# Supplementary material for: Interplay Between BALL and CREB Binding Protein Maintains H3K27 Acetylation on Active Genes in Drosophila
Source: Front Cell Dev Biol. 2021 Sep 28;9:740866. doi: 10.3389/fcell.2021.740866 (PMC8509297; doi:10.3389/fcell.2021.740866)
Supplement: Supplementary file 1 [file Table_1.XLSX]

## Sheet: Sheet1
Active genes S2 cells	CBP bound genes	BALL bound genes	Active genes that CBP bound	Active genes that BALL bound	Genes bound by both CBP and BALL	Active genes that both BALL and CBP bound
eEF1alpha1	312	312	312	312	128up	312
Hsp83	2021-09-01	2021-09-01	2021-09-01	2021-09-01	14-3-3epsilon	2021-09-01
eEF2	2021-09-04	2021-09-02	2021-09-04	2021-09-02	14-3-3zeta	128up
Hsc70-4	128up	2021-09-05	128up	2021-09-05	18w	14-3-3epsilon
lncRNA:CR34335	14-3-3epsilon	128up	14-3-3epsilon	128up	26-29-p	14-3-3zeta
Act5C	14-3-3zeta	14-3-3epsilon	14-3-3zeta	14-3-3epsilon	312	18w
RpL5	18w	14-3-3zeta	18w	14-3-3zeta	4E-T	26-29-p
zfh1	26-29-p	18w	26-29-p	18w	a	4E-T
RpL3	4E-T	26-29-p	4E-T	26-29-p	A16	a
RpL6	a	4E-T	a	4E-T	Aatf	A16
alphaTub84B	A16	5PtaseI	A16	5PtaseI	ABCB7	Aatf
ImpL2	Aatf	a	Aatf	a	ABCD	ABCB7
pAbp	ABCA	A16	ABCA	A16	Abl	ABCD
RpL4	ABCB7	a6	ABCB7	a6	Abp1	Abl
eIF4A	ABCD	Aasdh	ABCD	Aasdh	Ac76E	Abp1
RpS8	Abl	Aatf	Abl	Aatf	ACC	Ac76E
RpS3A	Abp1	ABCB7	Abp1	ABCB7	AcCoAS	ACC
RpS3	Ac76E	ABCD	Ac76E	ABCD	Acf	AcCoAS
RpS2	ACC	Abi	ACC	Abi	Ack	Acf
RpS7	AcCoAS	Abl	AcCoAS	Abl	Ack-like	Ack
Act42A	Acf	Abp1	Acf	Abp1	Acn	Ack-like
RpL7	Ack	abs	Ack	abs	Acox57D-p	Acn
Xbp1	Ack-like	Ac76E	Ack-like	Ac76E	Acph-1	Acox57D-p
RpS6	Acn	ACC	Acn	ACC	Acsl	Acph-1
RpS4	Acox57D-p	AcCoAS	Acox57D-p	AcCoAS	Act42A	Acsl
betaTub56D	Acph-1	Acf	Acph-1	Acf	Act5C	Act42A
Xrp1	Acsl	Ack	Acsl	Ack	Actn	Act5C
eEF1gamma	Act42A	Ack-like	Act42A	Ack-like	Ada2a	Actn
CycG	Act5C	Acn	Act5C	Acn	Ada2b	Ada2a
RpL13A	Actn	Acox57D-p	Actn	Acox57D-p	AdamTS-A	Ada2b
Moe	Ada2a	Acph-1	Ada2a	Acph-1	Adar	AdamTS-A
LanA	Ada2b	Acsl	Ada2b	Acsl	Adck	Adar
RpL23A	AdamTS-A	Act42A	AdamTS-A	Act42A	AdenoK	Adck
RpL13	Adar	Act5C	Adar	Act5C	Adf1	AdenoK
FASN1	Adck	Actn	Adck	Actn	Adgf-A	Adf1
RpS11	AdenoK	Ada2a	AdenoK	Ada2a	Adi1	Adgf-A
sty	Adf1	Ada2b	Adf1	Ada2b	AdipoR	Adi1
Hsc70-3	Adgf-A	AdamTS-A	Adgf-A	AdamTS-A	Adk1	AdipoR
RpLP1	Adi1	Adar	Adi1	Adar	Adk2	Adk1
sta	AdipoR	Adck	AdipoR	Adck	AdSL	Adk2
kay	Adk1	ADD1	Adk1	ADD1	AdSS	AdSL
betaTub60D	Adk2	AdenoK	Adk2	AdenoK	Aduk	AdSS
RpL27A	AdSL	Adf1	AdSL	Adf1	Ady43A	Aduk
ap	AdSS	Adgf-A	AdSS	Adgf-A	ago	Ady43A
Ppn	Aduk	Adi1	Aduk	Adi1	AGO1	ago
RpS5a	Ady43A	AdipoR	Ady43A	AdipoR	AGO2	AGO1
RpL26	Afti	Adk1	Afti	Adk1	Agpat2	AGO2
RpLP2	ago	Adk2	ago	Adk2	Agpat3	Agpat2
RpS29	AGO1	AdSL	AGO1	AdSL	agt	Agpat3
RpL9	AGO2	AdSS	AGO2	AdSS	AIMP2	agt
Eno	Agpat2	Aduk	Agpat2	Aduk	AIMP3	AIMP2
RpL15	Agpat3	Ady43A	Agpat3	Ady43A	Akap200	AIMP3
sqd	agt	Aef1	agt	Aef1	akirin	Akap200
RpL28	AIMP2	aft	AIMP2	aft	Akt1	akirin
RpS26	AIMP3	AGBE	AIMP3	AGBE	AlaRS	Akt1
Pdi	Akap200	ago	Akap200	ago	AlaRS-m	AlaRS
RpL27	akirin	AGO1	akirin	AGO1	alc	AlaRS-m
Non1	Akt1	AGO2	Akt1	AGO2	Ald1	alc
RpL11	AlaRS	Agpat2	AlaRS	Agpat2	Aldh	Ald1
Rack1	AlaRS-m	Agpat3	AlaRS-m	Agpat3	Aldh-III	Aldh
Gp150	alc	agt	alc	agt	Alg1	Aldh-III
Frl	Ald1	Ahcy	Ald1	Ahcy	Alg11	Alg1
Rm62	Aldh	AhcyL1	Aldh	AhcyL1	Alg2	Alg11
RpLP0	Aldh7A1	AIF	Aldh7A1	AIF	Alg3	Alg2
Tctp	Aldh-III	AIMP1	Aldh-III	AIMP1	Alg9	Alg3
RpL10Ab	Alg1	AIMP2	Alg1	AIMP2	Alh	Alg9
lncRNA:CR42862	Alg11	AIMP3	Alg11	AIMP3	ALiX	Alh
RpS9	Alg2	Akap200	Alg2	Akap200	Alp12	ALiX
14-3-3epsilon	Alg3	akirin	Alg3	akirin	alph	Alp12
RpL17	Alg9	Akt1	Alg9	Akt1	alpha-Cat	alph
SREBP	Alh	Aladin	Alh	Aladin	alpha-Est10	alpha-Cat
RpL23	ALiX	AlaRS	ALiX	AlaRS	alpha-Est9	alpha-Est10
eIF3c	Alp12	AlaRS-m	Alp12	AlaRS-m	alpha-Man-Ia	alpha-Est9
Vha16-1	alph	Alas	alph	Alas	alpha-Man-IIb	alpha-Man-Ia
Lk6	alpha-Cat	alc	alpha-Cat	alc	alphaSnap	alpha-Man-IIb
RpL37a	alpha-Est1	Ald1	alpha-Est1	Ald1	alphaTub84B	alphaSnap
RpS25	alpha-Est10	Aldh	alpha-Est10	Aldh	AMPdeam	alphaTub84B
RpL14	alpha-Est3	Aldh-III	alpha-Est3	Aldh-III	Amun	AMPdeam
RpL8	alpha-Est7	Alg1	alpha-Est7	Alg1	Ankle2	Amun
Hsp60A	alpha-Est9	Alg11	alpha-Est9	Alg11	anne	Ankle2
RpL18A	alpha-Man-Ia	Alg2	alpha-Man-Ia	Alg2	AnxB9	anne
Uba1	alpha-Man-IIb	Alg-2	alpha-Man-IIb	Alg-2	aop	AnxB9
RpL7A	alphaSnap	Alg3	alphaSnap	Alg3	aos	aop
Sap-r	alpha-Spec	Alg9	alpha-Spec	Alg9	Aos1	aos
lost	alphaTub84B	Alh	alphaTub84B	Alh	AOX1	Aos1
Fer1HCH	alt	ALiX	alt	ALiX	AOX3	AOX1
kis	AMPdeam	Alp12	AMPdeam	Alp12	ap	AOX3
LanB1	AMPKalpha	alph	AMPKalpha	alph	AP-1gamma	ap
RpL10	Amt	alpha-Cat	Amt	alpha-Cat	AP-1mu	AP-1gamma
zfh2	Amun	alpha-Est10	Amun	alpha-Est10	AP-1sigma	AP-1mu
alpha-Spec	anchor	alpha-Est9	anchor	alpha-Est9	AP-2alpha	AP-1sigma
cher	Ankle2	alpha-Man-Ia	Ankle2	alpha-Man-Ia	Apc	AP-2alpha
RpS23	anne	alpha-Man-IIb	anne	alpha-Man-IIb	aPKC	Apc
Nacalpha	AnxB10	alphaSnap	AnxB10	alphaSnap	app	aPKC
RpS27A	AnxB11	alphaTub84B	AnxB11	alphaTub84B	Aps	app
Karybeta3	AnxB9	Alr	AnxB9	Alr	apt	Aps
Dgp-1	aop	amn	aop	amn	aqz	apt
Msp300	aos	AMPdeam	aos	AMPdeam	Arc1	aqz
RpL35	Aos1	Amun	Aos1	Amun	Arc2	Arc1
RpL31	AOX1	Ankle2	AOX1	Ankle2	Archease	Arc2
Akap200	AOX3	anne	AOX3	anne	Arf102F	Archease
Svil	ap	AnxB9	ap	AnxB9	Arf51F	Arf102F
RpL19	AP-1-2beta	aop	AP-1-2beta	aop	Arf79F	Arf51F
RpL21	AP-1gamma	aos	AP-1gamma	aos	ArfGAP1	Arf79F
RpS19a	AP-1mu	Aos1	AP-1mu	Aos1	ArfGAP3	ArfGAP1
RpL36	AP-1sigma	AOX1	AP-1sigma	AOX1	Argk	ArfGAP3
RpS18	AP-2alpha	AOX3	AP-2alpha	AOX3	ArgRS	Argk
Rip11	Apc	ap	Apc	ap	ArgRS-m	ArgRS
drongo	aPKC	AP-1gamma	aPKC	AP-1gamma	ari-2	ArgRS-m
mys	Apoltp	AP-1mu	Apoltp	AP-1mu	Arl1	ari-2
Meltrin	app	AP-1sigma	app	AP-1sigma	Arl2	Arl1
path	Aps	AP-2alpha	Aps	AP-2alpha	Arl4	Arl2
larp	apt	Apc	apt	Apc	Arl5	Arl4
Ldh	aqz	Apc2	aqz	Apc2	Arl6IP1	Arl5
Hrb27C	aralar1	aPKC	aralar1	aPKC	Arl8	Arl6IP1
Chc	Arc1	app	Arc1	app	arm	Arl8
RpS21	Arc2	Aps	Arc2	Aps	Arp1	arm
RpS13	Archease	apt	Archease	apt	Arp2	Arp1
ERp60	Arf102F	aqz	Arf102F	aqz	Arp5	Arp2
RpL36A	Arf51F	Arc1	Arf51F	Arc1	Arpc1	Arp5
crol	Arf79F	Arc2	Arf79F	Arc2	Arpc2	Arpc1
RpS10b	ArfGAP1	Arc42	ArfGAP1	Arc42	Arpc4	Arpc2
rhea	ArfGAP3	Archease	ArfGAP3	Archease	arr	Arpc4
Hsc70Cb	Argk	Arf102F	Argk	Arf102F	Ars2	arr
RpL32	ArgRS	Arf51F	ArgRS	Arf51F	Art4	Ars2
RpS17	ArgRS-m	Arf79F	ArgRS-m	Arf79F	Art7	Art4
blw	ari-1	ArfGAP1	ari-1	ArfGAP1	Art8	Art7
sesB	ari-2	ArfGAP3	ari-2	ArfGAP3	aru	Art8
bic	Arl1	Arfip	Arl1	Arfip	Asap	aru
Pen	Arl2	Argk	Arl2	Argk	Asator	Asap
Not1	Arl4	ArgRS	Arl4	ArgRS	Asciz	Asator
RpL24	Arl5	ArgRS-m	Arl5	ArgRS-m	asf1	Asciz
Dp1	Arl6IP1	ari-2	Arl6IP1	ari-2	ash2	asf1
Pvr	Arl8	Arl1	Arl8	Arl1	Ask1	ash2
spen	arm	Arl2	arm	Arl2	asl	Ask1
RpS28b	Arp1	Arl4	Arp1	Arl4	AsnS	asl
eIF3b	Arp2	Arl5	Arp2	Arl5	asp	AsnS
msn	Arp3	Arl6IP1	Arp3	Arl6IP1	AspRS	asp
RpL40	Arp5	Arl8	Arp5	Arl8	asRNA:CR43629	AspRS
aqz	Arp8	arm	Arp8	arm	asRNA:CR43957	asRNA:CR43629
AspRS	Arpc1	armi	Arpc1	armi	asRNA:CR43964	asRNA:CR43957
Gp93	Arpc2	Arp1	Arpc2	Arp1	asRNA:CR44114	asRNA:CR43964
eIF3a	Arpc3A	Arp10	Arpc3A	Arp10	asRNA:CR44179	asRNA:CR44114
lig	Arpc4	Arp2	Arpc4	Arp2	asRNA:CR44375	asRNA:CR44179
Calr	Arpc5	Arp5	Arpc5	Arp5	asRNA:CR44969	asRNA:CR44375
msk	arr	Arpc1	arr	Arpc1	asRNA:CR44987	asRNA:CR44969
CCT6	Ars2	Arpc2	Ars2	Arpc2	asRNA:CR45126	asRNA:CR44987
RpL12	Art4	Arpc3B	Art4	Arpc3B	asRNA:CR45141	asRNA:CR45126
CG4822	Art7	Arpc4	Art7	Arpc4	asRNA:CR45396	asRNA:CR45141
Mpcp2	Art8	arr	Art8	arr	asRNA:CR45804	asRNA:CR45396
Cp1	aru	Ars2	aru	Ars2	asRNA:CR45875	asRNA:CR45804
beta-Spec	Asap	Art1	Asap	Art1	asRNA:CR46050	asRNA:CR45875
ThrRS	Asator	Art3	Asator	Art3	asRNA:CR46067	asRNA:CR46050
NAT1	Asciz	Art4	Asciz	Art4	asRNA:CR46105	asRNA:CR46067
Slik	asf1	Art7	asf1	Art7	asun	asRNA:CR46105
CG15099	ash2	Art8	ash2	Art8	Asx	asun
Sam-S	Ask1	Arts	Ask1	Arts	Atac1	Asx
mask	asl	aru	asl	aru	Atac3	Atac1
chic	AsnS	Asap	AsnS	Asap	Atet	Atac3
Sec61alpha	asp	Asator	asp	Asator	Atf-2	Atet
ATPsyngamma	AspRS	Asciz	AspRS	Asciz	Atf6	Atf-2
yata	asRNA:CR43629	asf1	asRNA:CR43629	asf1	Atg13	Atf6
ATPsynbeta	asRNA:CR43957	ash2	asRNA:CR43957	ash2	Atg14	Atg13
asRNA:CR45141	asRNA:CR43964	Ask1	asRNA:CR43964	Ask1	Atg16	Atg14
ctrip	asRNA:CR44047	asl	asRNA:CR44047	asl	Atg17	Atg16
Chd64	asRNA:CR44114	AsnRS	asRNA:CR44114	AsnRS	Atg18a	Atg17
Ect4	asRNA:CR44179	AsnS	asRNA:CR44179	AsnS	Atg18b	Atg18a
14-3-3zeta	asRNA:CR44375	asp	asRNA:CR44375	asp	Atg2	Atg18b
eEF1beta	asRNA:CR44962	AspRS	asRNA:CR44962	AspRS	Atg3	Atg2
Rho1	asRNA:CR44969	AspRS-m	asRNA:CR44969	AspRS-m	Atg5	Atg3
RpS24	asRNA:CR44976	asRNA:CR43257	asRNA:CR44976	asRNA:CR43257	Atg6	Atg5
RpL34b	asRNA:CR44987	asRNA:CR43629	asRNA:CR44987	asRNA:CR43629	Atg8a	Atg6
Hsc70-5	asRNA:CR45108	asRNA:CR43957	asRNA:CR45108	asRNA:CR43957	Atg9	Atg8a
fs(1)h	asRNA:CR45126	asRNA:CR43964	asRNA:CR45126	asRNA:CR43964	atms	Atg9
Gale	asRNA:CR45141	asRNA:CR44053	asRNA:CR45141	asRNA:CR44053	Atox1	atms
Droj2	asRNA:CR45145	asRNA:CR44114	asRNA:CR45145	asRNA:CR44114	ATP6AP2	Atox1
Pep	asRNA:CR45396	asRNA:CR44179	asRNA:CR45396	asRNA:CR44179	ATP7	ATP6AP2
CG8184	asRNA:CR45528	asRNA:CR44375	asRNA:CR45528	asRNA:CR44375	ATP8B	ATP7
RpL41	asRNA:CR45682	asRNA:CR44690	asRNA:CR45682	asRNA:CR44690	Atpalpha	ATP8B
ncd	asRNA:CR45778	asRNA:CR44969	asRNA:CR45778	asRNA:CR44969	ATPCL	Atpalpha
zip	asRNA:CR45798	asRNA:CR44987	asRNA:CR45798	asRNA:CR44987	ATPsynbeta	ATPCL
alt	asRNA:CR45804	asRNA:CR45126	asRNA:CR45804	asRNA:CR45126	ATPsynC	ATPsynbeta
cora	asRNA:CR45875	asRNA:CR45141	asRNA:CR45875	asRNA:CR45141	ATPsynCF6	ATPsynC
CG11357	asRNA:CR45885	asRNA:CR45367	asRNA:CR45885	asRNA:CR45367	ATPsynD	ATPsynCF6
RpS20	asRNA:CR45999	asRNA:CR45371	asRNA:CR45999	asRNA:CR45371	ATPsynE	ATPsynD
RpS15	asRNA:CR46050	asRNA:CR45396	asRNA:CR46050	asRNA:CR45396	ATPsynF	ATPsynE
prominin-like	asRNA:CR46067	asRNA:CR45804	asRNA:CR46067	asRNA:CR45804	ATPsynG	ATPsynF
kst	asRNA:CR46105	asRNA:CR45806	asRNA:CR46105	asRNA:CR45806	ATPsyngamma	ATPsynG
AGO2	asRNA:CR46128	asRNA:CR45875	asRNA:CR46128	asRNA:CR45875	ATPsynO	ATPsyngamma
nocte	asRNA:CR46137	asRNA:CR45928	asRNA:CR46137	asRNA:CR45928	Atx2	ATPsynO
Pvf2	asun	asRNA:CR46050	asun	asRNA:CR46050	Atxn7	Atx2
fry	Asx	asRNA:CR46067	Asx	asRNA:CR46067	aurB	Atxn7
Hsp26	Atac1	asRNA:CR46105	Atac1	asRNA:CR46105	awd	aurB
CCT2	Atac3	asun	Atac3	asun	Axn	awd
CNBP	Atet	Asx	Atet	Asx	Axs	Axn
CCT1	Atf-2	Atac1	Atf-2	Atac1	Axud1	Axs
eIF5B	Atf3	Atac2	Atf3	Atac2	B4	Axud1
vsg	Atf6	Atac3	Atf6	Atac3	B52	B4
RpL22	Atg1	Ate1	Atg1	Ate1	babo	B52
CG46385	Atg13	Atet	Atg13	Atet	Bacc	babo
eIF3d1	Atg14	Atf-2	Atg14	Atf-2	baf	Bacc
CCT3	Atg16	Atf6	Atg16	Atf6	Baldspot	baf
SPARC	Atg17	Atg13	Atg17	Atg13	Bap170	Baldspot
eff	Atg18a	Atg14	Atg18a	Atg14	Bap55	Bap170
AsnRS	Atg18b	Atg16	Atg18b	Atg16	Bap60	Bap55
LanB2	Atg2	Atg17	Atg2	Atg17	baz	Bap60
vir-1	Atg3	Atg18a	Atg3	Atg18a	bbc	baz
Dscam1	Atg4a	Atg18b	Atg4a	Atg18b	bbg	bbc
AlaRS	Atg5	Atg2	Atg5	Atg2	bc10	bbg
eIF3g1	Atg6	Atg3	Atg6	Atg3	bchs	bc10
TER94	Atg8a	Atg5	Atg8a	Atg5	BCL7-like	bchs
Arc1	Atg9	Atg6	Atg9	Atg6	bcn92	BCL7-like
His3.3B	atms	Atg8a	atms	Atg8a	bdg	bcn92
bel	Atox1	Atg9	Atox1	Atg9	be	bdg
Nup358	ATP6AP2	atms	ATP6AP2	atms	BEAF-32	be
PI4KIIIalpha	ATP7	Atox1	ATP7	Atox1	beg	BEAF-32
pix	ATP8B	ATP6AP2	ATP8B	ATP6AP2	bel	beg
wge	Atpalpha	ATP7	Atpalpha	ATP7	Best1	bel
Ten-m	ATPCL	ATP8A	ATPCL	ATP8A	Bet1	Best1
Stip1	ATPsynbeta	ATP8B	ATPsynbeta	ATP8B	Bet3	Bet1
ps	ATPsynC	Atpalpha	ATPsynC	Atpalpha	beta-Man	Bet3
Trxr-1	ATPsynCF6	ATPCL	ATPsynCF6	ATPCL	beta-PheRS	betaggt-II
CG15784	ATPsynD	ATPsynB	ATPsynD	ATPsynB	betaggt-II	beta-Man
Su(Tpl)	ATPsynE	ATPsynbeta	ATPsynE	ATPsynbeta	betaTub56D	beta-PheRS
Atpalpha	ATPsynF	ATPsynC	ATPsynF	ATPsynC	BHD	betaTub56D
lola	ATPsynG	ATPsynCF6	ATPsynG	ATPsynCF6	BI-1	BHD
osa	ATPsyngamma	ATPsynD	ATPsyngamma	ATPsynD	BicD	BI-1
Ran	ATPsynO	ATPsyndelta	ATPsynO	ATPsyndelta	bif	BicD
hpRNA:CR18854	Atx2	ATPsynE	Atx2	ATPsynE	Bin1	bif
MRP	Atxn7	ATPsynF	Atxn7	ATPsynF	bin3	Bin1
RpS30	aurB	ATPsynG	aurB	ATPsynG	Blm	bin3
CG9674	awd	ATPsyngamma	awd	ATPsyngamma	blow	Blm
Idgf6	Axn	ATPsynO	Axn	ATPsynO	blw	blow
CG3164	Axs	Atu	Axs	Atu	bmm	blw
tsr	Axud1	Atx2	Axud1	Atx2	bnl	bmm
Socs36E	B4	Atxn7	B4	Atxn7	BOD1	bnl
asRNA:CR45874	B52	aurB	B52	aurB	boi	BOD1
CCT8	babo	aux	babo	aux	bon	boi
Nc73EF	Bacc	awd	Bacc	awd	bor	bon
pnt	baf	Axn	baf	Axn	borr	bor
Cam	Baldspot	Axs	Baldspot	Axs	bowl	borr
ATP8B	Bap111	Axud1	Bap111	Axud1	br	bowl
RpL35A	Bap170	az2	Bap170	az2	brat	br
ctp	Bap55	B4	Bap55	B4	Brca2	brat
CG7791	Bap60	B52	Bap60	B52	Brd8	Brca2
tud	barc	babo	barc	babo	Bre1	Brd8
rin	barr	Bacc	barr	Bacc	Brf	Bre1
h	baz	baf	baz	baf	brk	Brf
Ald1	bbc	Baldspot	bbc	Baldspot	bru2	brk
dre4	bbg	Bap170	bbg	Bap170	BRWD3	bru2
CCT4	bc10	Bap55	bc10	Bap55	brwl	BRWD3
alphaCOP	bchs	Bap60	bchs	Bap60	Bsg	brwl
CG4364	BCL7-like	baz	BCL7-like	baz	Bsg25D	Bsg
foi	bcn92	bbc	bcn92	bbc	BtbVII	Bsg25D
Unr	bdg	bbg	bdg	bbg	BthD	BtbVII
eIF3e	Bdp1	bc10	Bdp1	bc10	Btk29A	BthD
faf	be	bchs	be	bchs	btn	Btk29A
Tig	BEAF-32	BCL7-like	BEAF-32	BCL7-like	BubR1	btn
eEF5	beg	bcn92	beg	bcn92	BuGZ	BubR1
CG6512	bel	Bdbt	bel	Bdbt	bun	BuGZ
RpS15Aa	ben	bdg	ben	bdg	Bx	bun
ush	Best1	be	Best1	be	by	Bx
Jupiter	Bet1	BEAF-32	Bet1	BEAF-32	c11.1	by
porin	Bet3	beg	Bet3	beg	c12.1	c11.1
kra	beta'COP	bel	beta'COP	bel	C1GalTA	c12.1
CCT7	betaggt-I	Bem46	betaggt-I	Bem46	C3G	C1GalTA
Hers	betaggt-II	Best1	betaggt-II	Best1	ca	C3G
srp	beta-Man	Bet1	beta-Man	Bet1	CaBP1	ca
CG9281	beta-PheRS	Bet3	beta-PheRS	Bet3	cact	CaBP1
CD98hc	beta-Spec	Bet5	beta-Spec	Bet5	Cad87A	cact
bsf	betaTub56D	beta4GalNAcTA	betaTub56D	beta4GalNAcTA	Caf1-180	Cad87A
Gapdh1	BHD	beta4GalT7	BHD	beta4GalT7	CAH3	Caf1-180
ref(2)P	BI-1	betaCOP	BI-1	betaCOP	CalpA	CAH3
GluProRS	bic	betaggt-II	bic	betaggt-II	CalpB	CalpA
RpS12	BicD	betaGlu	BicD	betaGlu	Calr	CalpB
CCT5	bif	beta-Man	bif	beta-Man	Cals	Calr
NTPase	Bin1	beta-PheRS	Bin1	beta-PheRS	Cam	Cals
KrT95D	bin3	betaTub56D	bin3	betaTub56D	CaMKII	Cam
CG7414	Blm	betaTub60D	Blm	betaTub60D	Camp	CaMKII
tmod	blow	Bgb	blow	Bgb	Camta	Camp
stg	blw	BHD	blw	BHD	cana	Camta
Nup98-96	bmm	BI-1	bmm	BI-1	CanA-14F	cana
eIF4G1	bnl	BicD	bnl	BicD	CanB2	CanA-14F
asRNA:CR45926	BOD1	bif	BOD1	bif	CAP	CanB2
CG6701	boi	Bin1	boi	Bin1	Cap-H2	CAP
RhoGAP71E	bon	bin3	bon	bin3	Caper	Caper
NUCB1	bor	bip2	bor	bip2	Capr	Cap-H2
Lam	borr	blanks	borr	blanks	caps	Capr
Smr	bowl	Blm	bowl	Blm	capt	caps
dom	br	blow	br	blow	capu	capt
Hrb98DE	brat	blw	brat	blw	CASK	capu
CG15098	Brca2	Bmcp	Brca2	Bmcp	cass	CASK
CG5346	Brd8	bmm	Brd8	bmm	Cat	cass
betaCOP	Bre1	bnl	Bre1	bnl	cathD	Cat
Mmp1	Brf	BOD1	Brf	BOD1	cav	cathD
CG10232	brk	boi	brk	boi	Cbl	cav
trio	bru2	bon	bru2	bon	cbs	Cbl
S6k	BRWD3	bor	BRWD3	bor	cbt	Cbs
stc	brwl	bora	brwl	bora	Ccdc58	cbt
Nap1	Bsg	borr	Bsg	borr	CCT1	Ccdc58
CG7518	Bsg25D	bowl	Bsg25D	bowl	CCT2	CCT1
NKAIN	BtbVII	br	BtbVII	br	CCT4	CCT2
Tet	BthD	Br140	BthD	Br140	CCT5	CCT4
Apc	Btk29A	brat	Btk29A	brat	CCT6	CCT5
brat	btn	Brca2	btn	Brca2	CCT7	CCT6
AdSS	BubR1	Brd8	BubR1	Brd8	CCT8	CCT7
eIF3m	BuGZ	Bre1	BuGZ	Bre1	CD98hc	CCT8
Df31	bun	Brf	bun	Brf	cdc14	CD98hc
Arpc1	bves	brk	bves	brk	Cdc16	cdc14
poe	Bx	bru2	Bx	bru2	Cdc27	Cdc16
ATPsynC	by	Bruce	by	Bruce	Cdc37	Cdc27
UQCR-C1	bys	BRWD3	bys	BRWD3	Cdc42	Cdc37
ALiX	c11.1	brwl	c11.1	brwl	CDC50	Cdc42
Arf79F	c12.1	bs	c12.1	bs	Cdc6	CDC50
Top1	C1GalTA	Bsg	C1GalTA	Bsg	Cdc7	Cdc6
capt	C3G	Bsg25D	C3G	Bsg25D	Cdep	Cdc7
Larp4B	ca	bsk	ca	bsk	cdi	Cdep
Tudor-SN	CaBP1	BtbVII	CaBP1	BtbVII	Cdk12	cdi
Mrp4	cact	BthD	cact	BthD	Cdk2	Cdk12
mtgo	Cad87A	Btk29A	Cad87A	Btk29A	CDK2AP1	Cdk2
CtBP	Caf1-180	btn	Caf1-180	btn	Cdk4	CDK2AP1
ValRS	CAH3	Bub3	CAH3	Bub3	Cds	Cdk4
SerRS	CAH7	BubR1	CAH7	BubR1	ced-6	Cds
Inos	CalpA	Bug22	CalpA	Bug22	CenG1A	ced-6
CG14273	CalpB	BuGZ	CalpB	BuGZ	Cenp-C	CenG1A
CG8036	Calr	bun	Calr	bun	Cep135	Cenp-C
PyK	Cals	bwa	Cals	bwa	Cerk	Cep135
spri	Cam	Bx	Cam	Bx	cert	Cerk
eIF2beta	CaMKII	by	CaMKII	by	cg	cert
Capr	Camp	c11.1	Camp	c11.1	CG10011	cg
arm	Camta	c12.1	Camta	c12.1	CG10038	CG10011
Hipk	cana	C1GalTA	cana	C1GalTA	CG10055	CG10038
CG17660	CanA-14F	C3G	CanA-14F	C3G	CG10077	CG10055
bif	CanB2	ca	CanB2	ca	CG10082	CG10077
B52	CAP	CaBP1	CAP	CaBP1	CG10103	CG10082
tou	Cap-D2	cact	Cap-D2	cact	CG10165	CG10103
Diap1	Cap-D3	Cad87A	Cap-D3	Cad87A	CG10171	CG10165
ced-6	Caper	Caf1-180	Caper	Caf1-180	CG10188	CG10171
bun	Cap-H2	CAH3	Cap-H2	CAH3	CG10189	CG10188
par-1	Capr	cal1	Capr	cal1	CG10209	CG10189
aos	caps	CalpA	caps	CalpA	CG10214	CG10209
CG42684	capt	CalpB	capt	CalpB	CG10232	CG10214
Cpr	capu	Calr	capu	Calr	CG1024	CG10232
kuz	CASK	Cals	CASK	Cals	CG10254	CG1024
MFS3	cass	Cam	cass	Cam	CG10283	CG10254
Usp10	Cat	CaMKI	Cat	CaMKI	CG10286	CG10283
eRF3	cathD	CaMKII	cathD	CaMKII	CG10321	CG10286
Imp	cav	Camp	cav	Camp	CG10333	CG10321
pigs	Cbl	Camta	Cbl	Camta	CG10336	CG10333
Trf2	cbs	cana	cbs	cana	CG10337	CG10336
Marf1	cbt	CanA-14F	cbt	CanA-14F	CG10338	CG10337
eIF3l	Ccdc58	CanB2	Ccdc58	CanB2	CG10341	CG10338
Cnx99A	Ccm3	Cand1	Ccm3	Cand1	CG10343	CG10341
SERCA	CCT1	CAP	CCT1	CAP	CG10353	CG10343
HisRS	CCT2	Caper	CCT2	Caper	CG10365	CG10353
eIF3f1	CCT4	Cap-H2	CCT4	Cap-H2	CG10366	CG10365
gammaCOP	CCT5	Capr	CCT5	Capr	CG10413	CG10366
CG32549	CCT6	caps	CCT6	caps	CG10425	CG10413
teq	CCT7	capt	CCT7	capt	CG10433	CG10425
RpL30	CCT8	capu	CCT8	capu	CG10435	CG10433
cindr	CD98hc	CASK	CD98hc	CASK	CG10444	CG10435
Thd1	CDase	casp	CDase	casp	CG10445	CG10444
ACC	cdc14	cass	cdc14	cass	CG10463	CG10445
MetRS	Cdc16	Cat	Cdc16	Cat	CG10465	CG10463
LRR	Cdc27	cathD	Cdc27	cathD	CG10470	CG10465
LKRSDH	Cdc2rk	Catsup	Cdc2rk	Catsup	CG10492	CG10470
CG8108	Cdc37	cav	Cdc37	cav	CG10495	CG10492
AOX1	Cdc42	cbc	Cdc42	cbc	CG10516	CG10495
eIF3h	CDC50	Cbl	CDC50	Cbl	CG10527	CG10516
l(1)G0320	Cdc6	Cbp80	Cdc6	Cbp80	CG10543	CG10527
CG3376	Cdc7	cbs	Cdc7	cbs	CG10555	CG10543
RpS16	Cdep	cbt	Cdep	cbt	CG10565	CG10555
Prp8	cdi	Ccdc58	cdi	Ccdc58	CG10576	CG10565
PEK	cDIP	Cchl	cDIP	Cchl	CG10600	CG10576
pum	Cdk1	CCT1	Cdk1	CCT1	CG10602	CG10600
ex	Cdk12	CCT2	Cdk12	CCT2	CG10616	CG10602
LeuRS	Cdk2	CCT3	Cdk2	CCT3	CG10631	CG10616
Oda	CDK2AP1	CCT4	CDK2AP1	CCT4	CG10674	CG10631
Sec31	Cdk4	CCT5	Cdk4	CCT5	CG10737	CG10674
sima	Cds	CCT6	Cds	CCT6	CG1074	CG10737
iPLA2-VIA	Ced-12	CCT7	Ced-12	CCT7	CG10778	CG1074
Idgf3	ced-6	CCT8	ced-6	CCT8	CG10795	CG10778
AGO1	CenB1A	Ccz1	CenB1A	Ccz1	CG10809	CG10795
Bruce	CenG1A	CD98hc	CenG1A	CD98hc	CG10863	CG10809
aru	Cenp-C	cdc14	Cenp-C	cdc14	CG10874	CG10863
CG42674	Cep135	Cdc16	Cep135	Cdc16	CG10889	CG10874
pyd	Cerk	Cdc27	Cerk	Cdc27	CG10898	CG10889
Gpo1	cert	Cdc37	cert	Cdc37	CG1090	CG10898
CG10576	cerv	Cdc42	cerv	Cdc42	CG10903	CG1090
Rpn2	cg	CDC50	cg	CDC50	CG10904	CG10903
Sra-1	CG10011	Cdc6	CG10011	Cdc6	CG10914	CG10904
CG42668	CG10038	Cdc7	CG10038	Cdc7	CG10915	CG10914
RpL29	CG10055	Cdep	CG10055	Cdep	CG10916	CG10915
Ufd4	CG10077	CdGAPr	CG10077	CdGAPr	CG1092	CG10916
Tsp42Ee	CG10082	cdi	CG10082	cdi	CG10948	CG1092
hfp	CG10103	Cdk12	CG10103	Cdk12	CG10960	CG10948
capu	CG10165	Cdk2	CG10165	Cdk2	CG10962	CG10960
ct	CG10166	CDK2AP1	CG10166	CDK2AP1	CG1103	CG10962
Ubqn	CG10171	Cdk4	CG10171	Cdk4	CG11030	CG1103
Usp47	CG10188	Cdk7	CG10188	Cdk7	CG1105	CG11030
pzg	CG10189	Cdk9	CG10189	Cdk9	CG11050	CG1105
Map205	CG10209	cdm	CG10209	cdm	CG11070	CG11050
Abl	CG10214	Cds	CG10214	Cds	CG11089	CG11070
unc-13	CG10232	ced-6	CG10232	ced-6	CG11123	CG11089
Pcyt1	CG1024	CenG1A	CG1024	CenG1A	CG11137	CG11123
beta'COP	CG10254	Cenp-C	CG10254	Cenp-C	CG11151	CG11137
scra	CG10283	Cep135	CG10283	Cep135	CG11168	CG11151
Galphai	CG10286	Cep97	CG10286	Cep97	CG11178	CG11168
cpb	CG10300	Cerk	CG10300	Cerk	CG11180	CG11178
Msr-110	CG10321	cert	CG10321	cert	CG11210	CG11180
Spp	CG10333	cg	CG10333	cg	CG11247	CG11210
l(2)gl	CG10336	CG10011	CG10336	CG10011	CG11267	CG11247
pico	CG10337	CG10038	CG10337	CG10038	CG1129	CG11267
Dhc64C	CG10338	CG10055	CG10338	CG10055	CG11309	CG1129
egh	CG10341	CG10068	CG10341	CG10068	CG11357	CG11309
rgn	CG10343	CG10077	CG10343	CG10077	CG11360	CG11357
CG7324	CG10353	CG10082	CG10353	CG10082	CG11367	CG11360
fax	CG10365	CG10103	CG10365	CG10103	CG11377	CG11367
Karl	CG10366	CG10137	CG10366	CG10137	CG11399	CG11377
awd	CG10376	CG10139	CG10376	CG10139	CG11400	CG11399
Past1	CG10383	CG10165	CG10383	CG10165	CG11414	CG11400
CG45050	CG10413	CG10171	CG10413	CG10171	CG1142	CG11414
sgl	CG10425	CG10188	CG10425	CG10188	CG11444	CG1142
CG30122	CG10433	CG10189	CG10433	CG10189	CG11454	CG11444
GlyRS	CG10435	CG10194	CG10435	CG10194	CG1146	CG11454
kek1	CG10444	CG10209	CG10444	CG10209	CG11486	CG1146
Arp3	CG10445	CG10214	CG10445	CG10214	CG11504	CG11486
Gapdh2	CG10463	CG10222	CG10463	CG10222	CG11523	CG11504
Vinc	CG10465	CG10232	CG10465	CG10232	CG11537	CG11523
shep	CG10470	CG1024	CG10470	CG1024	CG11563	CG11537
Pp2A-29B	CG10492	CG10254	CG10492	CG10254	CG11583	CG11563
JhI-21	CG10495	CG10265	CG10495	CG10265	CG11586	CG11583
CG9663	CG10516	CG10268	CG10516	CG10268	CG11593	CG11586
mts	CG10527	CG10283	CG10527	CG10283	CG11596	CG11593
Pgi	CG10543	CG10286	CG10543	CG10286	CG11601	CG11596
RpII215	CG10555	CG10321	CG10555	CG10321	CG1161	CG11601
spoon	CG10565	CG10333	CG10565	CG10333	CG11658	CG1161
CG3558	CG10576	CG10336	CG10576	CG10336	CG11700	CG11658
CG10565	CG10600	CG10337	CG10600	CG10337	CG1172	CG11700
GlyP	CG10602	CG10338	CG10602	CG10338	CG11737	CG1172
RpL18	CG10616	CG10340	CG10616	CG10340	CG11753	CG11737
RhoGAP92B	CG10631	CG10341	CG10631	CG10341	CG11791	CG11753
Ssrp	CG10638	CG10343	CG10638	CG10343	CG11802	CG11791
ATPCL	CG10674	CG10353	CG10674	CG10353	CG11811	CG11802
lace	CG10737	CG10365	CG10737	CG10365	CG11837	CG11811
Hmgs	CG1074	CG10366	CG1074	CG10366	CG11857	CG11837
Cyt-c-p	CG10778	CG10413	CG10778	CG10413	CG11873	CG11857
asRNA:CR45371	CG10795	CG10417	CG10795	CG10417	CG11882	CG11873
Nop60B	CG10809	CG10425	CG10809	CG10425	CG11883	CG11882
upSET	CG10863	CG10428	CG10863	CG10428	CG11885	CG11883
Men	CG10874	CG10433	CG10874	CG10433	CG11899	CG11885
Tep4	CG10889	CG10435	CG10889	CG10435	CG11906	CG11899
woc	CG10898	CG10444	CG10898	CG10444	CG11920	CG11906
Desat1	CG1090	CG10445	CG1090	CG10445	CG11927	CG11920
Opa1	CG10903	CG10462	CG10903	CG10462	CG11961	CG11927
Uba2	CG10904	CG10463	CG10904	CG10463	CG11964	CG11961
Bsg	CG10914	CG10465	CG10914	CG10465	CG11970	CG11964
Sf3b3	CG10915	CG10467	CG10915	CG10467	CG11980	CG11970
Tep2	CG10916	CG10470	CG10916	CG10470	CG11986	CG11980
Nup205	CG1092	CG10492	CG1092	CG10492	CG12004	CG11986
mAcon1	CG10932	CG10495	CG10932	CG10495	CG12007	CG12004
p23	CG10948	CG10516	CG10948	CG10516	CG12010	CG12007
aop	CG10949	CG10527	CG10949	CG10527	CG12012	CG12010
RpS27	CG10960	CG10543	CG10960	CG10543	CG12024	CG12012
Sec23	CG10962	CG10555	CG10962	CG10555	CG12025	CG12024
Col4a1	CG10984	CG10565	CG10984	CG10565	CG12054	CG12025
shot	CG1103	CG10576	CG1103	CG10576	CG12065	CG12054
Top2	CG11030	CG10600	CG11030	CG10600	CG12075	CG12065
kdn	CG1105	CG10602	CG1105	CG10602	CG12081	CG12075
CG1910	CG11050	CG10616	CG11050	CG10616	CG12084	CG12081
Psa	CG11070	CG10631	CG11070	CG10631	CG12091	CG12084
CG1943	CG11089	CG10646	CG11089	CG10646	CG12099	CG12091
Sec24CD	CG11123	CG10674	CG11123	CG10674	CG12104	CG12099
puf	CG11137	CG10737	CG11137	CG10737	CG12107	CG12104
Amun	CG11141	CG1074	CG11141	CG1074	CG12112	CG12107
rempA	CG11151	CG10778	CG11151	CG10778	CG12118	CG12112
Stt3A	CG11168	CG10795	CG11168	CG10795	CG12121	CG12118
Ndf	CG11178	CG10802	CG11178	CG10802	CG12123	CG12121
nej	CG11180	CG10809	CG11180	CG10809	CG12128	CG12123
Phb2	CG11210	CG10863	CG11210	CG10863	CG12134	CG12128
msps	CG11247	CG10874	CG11247	CG10874	CG12159	CG12134
Crag	CG11267	CG10889	CG11267	CG10889	CG12163	CG12159
HmgD	CG1129	CG10898	CG1129	CG10898	CG12171	CG12163
Smg5	CG11307	CG1090	CG11307	CG1090	CG12173	CG12171
yin	CG11309	CG10903	CG11309	CG10903	CG1218	CG12173
PMCA	CG11357	CG10904	CG11357	CG10904	CG12219	CG1218
Gfat2	CG11360	CG10907	CG11360	CG10907	CG12224	CG12219
CG2017	CG11367	CG10914	CG11367	CG10914	CG12236	CG12224
CG42232	CG11377	CG10915	CG11377	CG10915	CG12279	CG12236
polo	CG11399	CG10916	CG11399	CG10916	CG12290	CG12279
Mi-2	CG11400	CG1092	CG11400	CG1092	CG12301	CG12290
Pect	CG11414	CG10948	CG11414	CG10948	CG12316	CG12301
dlg1	CG1142	CG10960	CG1142	CG10960	CG1233	CG12316
Gmap	CG11436	CG10962	CG11436	CG10962	CG12384	CG1233
eIF3i	CG11444	CG10973	CG11444	CG10973	CG12391	CG12384
Swip-1	CG11454	CG11007	CG11454	CG11007	CG12393	CG12391
Pax	CG1146	CG1103	CG1146	CG1103	CG12499	CG12393
Myo31DF	CG11486	CG11030	CG11486	CG11030	CG12512	CG12499
asRNA:CR31144	CG11504	CG11035	CG11504	CG11035	CG12520	CG12512
Atx2	CG11523	CG1105	CG11523	CG1105	CG12717	CG12520
mbc	CG11537	CG11050	CG11537	CG11050	CG12728	CG12717
CG32369	CG11563	CG11070	CG11563	CG11070	CG12730	CG12728
Sin3A	CG11583	CG11076	CG11583	CG11076	CG12746	CG12730
CG30015	CG11586	CG11077	CG11586	CG11077	CG12768	CG12746
Thor	CG11593	CG11089	CG11593	CG11089	CG12772	CG12768
SCAP	CG11596	CG11122	CG11596	CG11122	CG12848	CG12772
Sur-8	CG11601	CG11123	CG11601	CG11123	CG12863	CG12848
gw	CG1161	CG11125	CG1161	CG11125	CG12948	CG12863
eIF4G2	CG11655	CG11127	CG11655	CG11127	CG12975	CG12948
Tm1	CG11658	CG11137	CG11658	CG11137	CG13001	CG12975
sd	CG11700	CG11151	CG11700	CG11151	CG13025	CG13001
CG6891	CG1172	CG1116	CG1172	CG1116	CG1307	CG13025
E2f1	CG11723	CG11168	CG11723	CG11168	CG1309	CG1307
Indy	CG11737	CG11178	CG11737	CG11178	CG13096	CG1309
scf	CG11753	CG11180	CG11753	CG11180	CG13117	CG13096
Bap170	CG11791	CG11200	CG11791	CG11200	CG13124	CG13117
sol	CG11802	CG11210	CG11802	CG11210	CG1316	CG13124
Cortactin	CG11811	CG11247	CG11811	CG11247	CG13185	CG1316
eIF4E1	CG11837	CG11267	CG11837	CG11267	CG13192	CG13185
AnxB9	CG11857	CG1129	CG11857	CG1129	CG13252	CG13192
clu	CG11873	CG11309	CG11873	CG11309	CG13344	CG13252
tai	CG11882	CG11357	CG11882	CG11357	CG13366	CG13344
2021-09-02	CG11883	CG11360	CG11883	CG11360	CG13384	CG13366
CG5004	CG11885	CG11367	CG11885	CG11367	CG13398	CG13384
e(y)3	CG11899	CG11377	CG11899	CG11377	CG13531	CG13398
RpS14a	CG11906	CG11399	CG11906	CG11399	CG13551	CG13531
Naa15-16	CG11920	CG11400	CG11920	CG11400	CG1358	CG13551
wdb	CG11927	CG11403	CG11927	CG11403	CG13585	CG1358
OstDelta	CG11961	CG11414	CG11961	CG11414	CG13601	CG13585
sktl	CG11964	CG1142	CG11964	CG1142	CG13603	CG13601
cic	CG11970	CG11444	CG11970	CG11444	CG13604	CG13603
eRF1	CG11980	CG11454	CG11980	CG11454	CG13605	CG13604
psq	CG11986	CG1146	CG11986	CG1146	CG13631	CG13605
Cdc42	CG12004	CG11474	CG12004	CG11474	CG13667	CG13631
Jafrac1	CG12007	CG11486	CG12007	CG11486	CG13690	CG13667
InR	CG12010	CG11504	CG12010	CG11504	CG1371	CG13690
IntS11	CG12012	CG11523	CG12012	CG11523	CG13751	CG1371
l(3)02640	CG12024	CG11537	CG12024	CG11537	CG13773	CG13751
Irc	CG12025	CG11555	CG12025	CG11555	CG13775	CG13773
Doa	CG12054	CG11562	CG12054	CG11562	CG13784	CG13775
Tpi	CG12065	CG11563	CG12065	CG11563	CG13850	CG13784
Cp190	CG12075	CG11583	CG12075	CG11583	CG13868	CG13850
Ge-1	CG12081	CG11586	CG12081	CG11586	CG13887	CG13868
Unc-76	CG12084	CG11593	CG12084	CG11593	CG13893	CG13887
Pgm1	CG12091	CG11596	CG12091	CG11596	CG13895	CG13893
Dg	CG12093	CG11601	CG12093	CG11601	CG13896	CG13895
Vha55	CG12099	CG1161	CG12099	CG1161	CG13907	CG13896
CG6084	CG12104	CG11658	CG12104	CG11658	CG13917	CG13907
CG2926	CG12107	CG11699	CG12107	CG11699	CG13994	CG13917
Pgk	CG12112	CG11700	CG12112	CG11700	CG14043	CG13994
CG31523	CG12118	CG1172	CG12118	CG1172	CG14073	CG14043
CG7987	CG12121	CG11737	CG12121	CG11737	CG14100	CG14073
CaBP1	CG12123	CG11753	CG12123	CG11753	CG1416	CG14100
blanks	CG12128	CG11779	CG12128	CG11779	CG14207	CG1416
rush	CG12134	CG11790	CG12134	CG11790	CG14220	CG14207
CysRS	CG12159	CG11791	CG12159	CG11791	CG14253	CG14220
mib1	CG12163	CG11802	CG12163	CG11802	CG14273	CG14253
eIF4H1	CG12170	CG11807	CG12170	CG11807	CG14291	CG14273
Gyf	CG12171	CG11811	CG12171	CG11811	CG14341	CG14291
Nup153	CG12173	CG11837	CG12173	CG11837	CG1440	CG14341
CG10077	CG12177	CG11857	CG12177	CG11857	CG14408	CG1440
CDase	CG1218	CG11873	CG1218	CG11873	CG14414	CG14408
CG3638	CG12219	CG11882	CG12219	CG11882	CG14434	CG14414
Tlk	CG12224	CG11883	CG12224	CG11883	CG14435	CG14434
Mes2	CG12236	CG11885	CG12236	CG11885	CG14478	CG14435
Stat92E	CG12259	CG11899	CG12259	CG11899	CG14545	CG14478
SsRbeta	CG12267	CG11906	CG12267	CG11906	CG14561	CG14545
mod	CG12279	CG11920	CG12279	CG11920	CG14621	CG14561
eIF1	CG12288	CG11927	CG12288	CG11927	CG14641	CG14621
CG3168	CG12290	CG11929	CG12290	CG11929	CG14646	CG14641
Klp3A	CG12301	CG11961	CG12301	CG11961	CG14650	CG14646
Acsl	CG12316	CG11964	CG12316	CG11964	CG14657	CG14650
Wdfy2	CG12325	CG11970	CG12325	CG11970	CG14667	CG14657
Gtp-bp	CG1233	CG11975	CG1233	CG11975	CG14683	CG14667
bor	CG1236	CG11980	CG1236	CG11980	CG14696	CG14683
IP3K1	CG12384	CG11986	CG12384	CG11986	CG14710	CG14696
Pfk	CG12391	CG12004	CG12391	CG12004	CG14715	CG14710
RhoGAP18B	CG12393	CG12007	CG12393	CG12007	CG14764	CG14715
bbc	CG12499	CG12010	CG12499	CG12010	CG14767	CG14764
sov	CG12512	CG12012	CG12512	CG12012	CG14795	CG14767
rdog	CG12520	CG12024	CG12520	CG12024	CG14805	CG14795
c11.1	CG12567	CG12025	CG12567	CG12025	CG1486	CG14805
eIF2gamma	CG12576	CG12054	CG12576	CG12054	CG14883	CG1486
spi	CG12717	CG12065	CG12717	CG12065	CG14906	CG14883
east	CG12728	CG12075	CG12728	CG12075	CG14907	CG14906
hts	CG12730	CG12081	CG12730	CG12081	CG14965	CG14907
Fmr1	CG12746	CG12084	CG12746	CG12084	CG14985	CG14965
CG1882	CG1275	CG12091	CG1275	CG12091	CG14997	CG14985
PH4alphaEFB	CG12768	CG12099	CG12768	CG12099	CG15019	CG14997
l(1)G0289	CG12772	CG12104	CG12772	CG12104	CG15073	CG15019
Clic	CG12795	CG12106	CG12795	CG12106	CG15083	CG15073
rudhira	CG12811	CG12107	CG12811	CG12107	CG15093	CG15083
SNF4Agamma	CG12848	CG12112	CG12848	CG12112	CG15097	CG15093
Snx6	CG12863	CG12118	CG12863	CG12118	CG15098	CG15097
SdhA	CG12877	CG12121	CG12877	CG12121	CG15099	CG15098
chb	CG12883	CG12123	CG12883	CG12123	CG15111	CG15099
SCAR	CG12948	CG12128	CG12948	CG12128	CG15117	CG15111
velo	CG12975	CG12129	CG12975	CG12129	CG15141	CG15117
Chchd2	CG13001	CG12134	CG13001	CG12134	CG15160	CG15141
CG9425	CG13025	CG12155	CG13025	CG12155	CG15209	CG15160
Taf4	CG1307	CG12159	CG1307	CG12159	CG1532	CG15209
htt	CG1309	CG12163	CG1309	CG12163	CG15356	CG1532
IleRS	CG13096	CG12171	CG13096	CG12171	CG1542	CG15356
GLS	CG13117	CG12173	CG13117	CG12173	CG15435	CG1542
Incenp	CG13124	CG12179	CG13124	CG12179	CG1544	CG15435
HDAC4	CG1316	CG1218	CG1316	CG1218	CG15440	CG1544
Hrb87F	CG13185	CG12182	CG13185	CG12182	CG15445	CG15440
crp	CG13192	CG12213	CG13192	CG12213	CG15561	CG15445
emb	CG13252	CG12219	CG13252	CG12219	CG15611	CG15561
Idh	CG13344	CG12224	CG13344	CG12224	CG15625	CG15611
Mtor	CG13366	CG12236	CG13366	CG12236	CG15695	CG15625
Alas	CG13384	CG12279	CG13384	CG12279	CG15715	CG15695
mod(mdg4)	CG13397	CG12290	CG13397	CG12290	CG1572	CG15715
SH3PX1	CG13398	CG12299	CG13398	CG12299	CG15744	CG1572
Sec63	CG13531	CG12301	CG13531	CG12301	CG15747	CG15744
scrib	CG13551	CG12316	CG13551	CG12316	CG15771	CG15747
Mekk1	CG1358	CG1233	CG1358	CG1233	CG15784	CG15771
Vha100-2	CG13585	CG12333	CG13585	CG12333	CG15812	CG15784
Cdep	CG13601	CG12379	CG13601	CG12379	CG15890	CG15812
CG45263	CG13603	CG12384	CG13603	CG12384	CG1628	CG15890
kibra	CG13604	CG12391	CG13604	CG12391	CG1640	CG1628
yps	CG13605	CG12393	CG13605	CG12393	CG1647	CG1640
hdc	CG13631	CG12499	CG13631	CG12499	CG1671	CG1647
l(2)37Cc	CG13667	CG12512	CG13667	CG12512	CG16717	CG1671
Vha68-2	CG13690	CG12520	CG13690	CG12520	CG16721	CG16717
Cpsf6	CG1371	CG12608	CG1371	CG12608	CG1673	CG16721
CG1703	CG13751	CG1265	CG13751	CG1265	CG16753	CG1673
Fib	CG13773	CG12702	CG13773	CG12702	CG1677	CG16753
Rab11	CG13775	CG12717	CG13775	CG12717	CG16787	CG1677
l(3)72Ab	CG13784	CG12728	CG13784	CG12728	CG16791	CG16787
CG8839	CG13850	CG12730	CG13850	CG12730	CG16812	CG16791
Hmu	CG13868	CG12746	CG13868	CG12746	CG16903	CG16812
CG12163	CG13887	CG12768	CG13887	CG12768	CG16989	CG16903
Klp10A	CG13893	CG12772	CG13893	CG12772	CG1703	CG16989
RhoGEF2	CG13895	CG12848	CG13895	CG12848	CG17068	CG1703
Stt3B	CG13896	CG12863	CG13896	CG12863	CG17119	CG17068
l(1)G0193	CG13907	CG12909	CG13907	CG12909	CG17129	CG17119
Tao	CG13917	CG12926	CG13917	CG12926	CG17141	CG17129
Ank	CG13994	CG12945	CG13994	CG12945	CG17202	CG17141
Pak	CG14005	CG12948	CG14005	CG12948	CG17221	CG17202
CAH3	CG14043	CG12975	CG14043	CG12975	CG17224	CG17221
cg	CG1407	CG13001	CG1407	CG13001	CG17230	CG17224
shn	CG14073	CG13014	CG14073	CG13014	CG17233	CG17230
26-29-p	CG14100	CG13025	CG14100	CG13025	CG17249	CG17233
CG33129	CG1416	CG1307	CG1416	CG1307	CG17265	CG17249
CG4199	CG14207	CG1309	CG14207	CG1309	CG17271	CG17265
CG43736	CG14220	CG13096	CG14220	CG13096	CG17278	CG17271
Dek	CG14230	CG13097	CG14230	CG13097	CG17292	CG17278
Efa6	CG14253	CG13117	CG14253	CG13117	CG17337	CG17292
Khc	CG1427	CG13124	CG1427	CG13124	CG17385	CG17337
Mtpalpha	CG14273	CG13126	CG14273	CG13126	CG17486	CG17385
Hel89B	CG14291	CG13151	CG14291	CG13151	CG17508	CG17486
asRNA:CR44962	CG14341	CG1316	CG14341	CG1316	CG17514	CG17508
hyd	CG1440	CG1317	CG1440	CG1317	CG17528	CG17514
Letm1	CG14408	CG13185	CG14408	CG13185	CG17544	CG17528
Pp1-87B	CG14411	CG13192	CG14411	CG13192	CG17556	CG17544
Fs(2)Ket	CG14414	CG13252	CG14414	CG13252	CG17574	CG17556
Eps-15	CG14434	CG13344	CG14434	CG13344	CG1764	CG17574
Vha26	CG14435	CG13366	CG14435	CG13366	CG17660	CG1764
dop	CG14440	CG13384	CG14440	CG13384	CG17734	CG17660
asRNA:CR43787	CG14443	CG13390	CG14443	CG13390	CG17746	CG17734
atl	CG14478	CG13398	CG14478	CG13398	CG17754	CG17746
Rbcn-3A	CG14545	CG13531	CG14545	CG13531	CG17760	CG17754
Hsp23	CG14561	CG1354	CG14561	CG1354	CG17765	CG17760
CG3008	CG14613	CG13551	CG14613	CG13551	CG17841	CG17765
cv-c	CG14621	CG1358	CG14621	CG1358	CG1789	CG17841
RasGAP1	CG14629	CG13585	CG14629	CG13585	CG17896	CG1789
Sec71	CG14641	CG13601	CG14641	CG13601	CG17985	CG17896
Hel25E	CG14646	CG13603	CG14646	CG13603	CG18011	CG17985
Fkbp39	CG14650	CG13604	CG14650	CG13604	CG18048	CG18011
cnn	CG14657	CG13605	CG14657	CG13605	CG18081	CG18048
chinmo	CG14667	CG13625	CG14667	CG13625	CG18135	CG18081
loco	CG14683	CG13630	CG14683	CG13630	CG1815	CG18135
E(Pc)	CG14695	CG13631	CG14695	CG13631	CG18190	CG1815
CG1677	CG14696	CG13667	CG14696	CG13667	CG1827	CG18190
brm	CG14710	CG13690	CG14710	CG13690	CG18343	CG1827
RhoGDI	CG14712	CG1371	CG14712	CG1371	CG18476	CG18343
Cyp6a20	CG14715	CG13751	CG14715	CG13751	CG18528	CG18476
crc	CG14764	CG13773	CG14764	CG13773	CG18547	CG18528
NFAT	CG14767	CG13775	CG14767	CG13775	CG18549	CG18547
lva	CG14795	CG13784	CG14795	CG13784	CG18596	CG18549
sip2	CG14805	CG13850	CG14805	CG13850	CG18600	CG18596
CG6659	CG1486	CG13868	CG1486	CG13868	CG18659	CG18600
lncRNA:CR43334	CG14882	CG13887	CG14882	CG13887	CG18661	CG18659
Rap1	CG14883	CG13893	CG14883	CG13893	CG18766	CG18661
ena	CG14894	CG13895	CG14894	CG13895	CG18809	CG18766
vkg	CG14906	CG13896	CG14906	CG13896	CG18815	CG18809
Rel	CG14907	CG13907	CG14907	CG13907	CG1882	CG18815
HERC2	CG14945	CG13917	CG14945	CG13917	CG1888	CG1882
RpL39	CG14949	CG13994	CG14949	CG13994	CG1890	CG1888
klar	CG14965	CG14043	CG14965	CG14043	CG1902	CG1890
CG6686	CG14985	CG14057	CG14985	CG14057	CG1907	CG1902
hang	CG14997	CG14073	CG14997	CG14073	CG1910	CG1907
bdg	CG15012	CG14100	CG15012	CG14100	CG1927	CG1910
Elp1	CG15014	CG1416	CG15014	CG1416	CG1943	CG1927
Aldh	CG15019	CG14174	CG15019	CG14174	CG1951	CG1943
Not3	CG15073	CG14184	CG15073	CG14184	CG1998	CG1951
MBD-R2	CG15083	CG14194	CG15083	CG14194	CG2006	CG1998
Spg7	CG15093	CG14200	CG15093	CG14200	CG2017	CG2006
Ubr1	CG15097	CG14207	CG15097	CG14207	CG2023	CG2017
gpp	CG15098	CG14220	CG15098	CG14220	CG2064	CG2023
CG11122	CG15099	CG14253	CG15099	CG14253	CG2065	CG2064
Nmda1	CG15111	CG14273	CG15111	CG14273	CG2076	CG2065
CG31705	CG15117	CG14291	CG15117	CG14291	CG2091	CG2076
Cbs	CG15141	CG14322	CG15141	CG14322	CG2116	CG2091
LTV1	CG15160	CG14341	CG15160	CG14341	CG2124	CG2116
tacc	CG15209	CG1440	CG15209	CG1440	CG2162	CG2124
lid	CG15237	CG14407	CG15237	CG14407	CG2186	CG2162
Usp7	CG1532	CG14408	CG1532	CG14408	CG2199	CG2186
tyf	CG15356	CG14414	CG15356	CG14414	CG2201	CG2199
Cubn	CG1542	CG14434	CG1542	CG14434	CG2211	CG2201
CycB	CG15435	CG14435	CG15435	CG14435	CG2224	CG2211
hrg	CG1544	CG14442	CG1544	CG14442	CG2225	CG2224
nop5	CG15440	CG14478	CG15440	CG14478	CG2260	CG2225
sle	CG15445	CG14480	CG15445	CG14480	CG2277	CG2260
CG2918	CG15543	CG14544	CG15543	CG14544	CG2310	CG2277
spg	CG15561	CG14545	CG15561	CG14545	CG2493	CG2310
Rtnl1	CG15611	CG14561	CG15611	CG14561	CG2519	CG2493
CG13887	CG15625	CG14621	CG15625	CG14621	CG2685	CG2519
cpa	CG15673	CG14641	CG15673	CG14641	CG2747	CG2685
Pdcd4	CG15695	CG14646	CG15695	CG14646	CG2765	CG2747
RpL38	CG15706	CG14650	CG15706	CG14650	CG2767	CG2765
ytr	CG15715	CG14657	CG15715	CG14657	CG2794	CG2767
mbf1	CG1572	CG14667	CG1572	CG14667	CG2811	CG2794
REPTOR	CG15744	CG14683	CG15744	CG14683	CG2818	CG2811
Orct2	CG15747	CG14696	CG15747	CG14696	CG2852	CG2818
dos	CG15771	CG14710	CG15771	CG14710	CG2862	CG2852
su(r)	CG1578	CG14711	CG1578	CG14711	CG2865	CG2862
GstE6	CG15784	CG14715	CG15784	CG14715	CG2875	CG2865
Rab35	CG15812	CG14721	CG15812	CG14721	CG2889	CG2875
alph	CG15877	CG14764	CG15877	CG14764	CG2915	CG2889
sqh	CG15890	CG14767	CG15890	CG14767	CG2918	CG2915
Syx1A	CG15908	CG14795	CG15908	CG14795	CG2924	CG2918
Nepl3	CG1620	CG14805	CG1620	CG14805	CG2926	CG2924
Piezo	CG1628	CG1486	CG1628	CG1486	CG2930	CG2926
eIF2Bdelta	CG1635	CG14860	CG1635	CG14860	CG2991	CG2930
koi	CG1640	CG14883	CG1640	CG14883	CG30015	CG2991
CG2218	CG1647	CG14906	CG1647	CG14906	CG30020	CG30015
ens	CG1671	CG14907	CG1671	CG14907	CG30022	CG30020
Glg1	CG16717	CG14965	CG16717	CG14965	CG30069	CG30022
FeCH	CG16721	CG14969	CG16721	CG14969	CG3008	CG30069
l(1)G0196	CG1673	CG14971	CG1673	CG14971	CG30089	CG3008
Zn72D	CG16743	CG14985	CG16743	CG14985	CG30122	CG30089
oys	CG16753	CG14995	CG16753	CG14995	CG30159	CG30122
Zasp52	CG1677	CG14997	CG1677	CG14997	CG30291	CG30159
pst	CG16787	CG15019	CG16787	CG15019	CG30344	CG30291
Klp61F	CG16791	CG15073	CG16791	CG15073	CG30389	CG30344
Rpn1	CG16812	CG15083	CG16812	CG15083	CG30392	CG30389
asRNA:CR45604	CG16896	CG15093	CG16896	CG15093	CG30394	CG30392
Acn	CG16903	CG15097	CG16903	CG15097	CG3040	CG30394
CG8531	CG16974	CG15098	CG16974	CG15098	CG30423	CG3040
CG2691	CG16989	CG15099	CG16989	CG15099	CG3045	CG30423
Kap-alpha3	CG1703	CG15107	CG1703	CG15107	CG30456	CG3045
Kdm2	CG17068	CG15111	CG17068	CG15111	CG30466	CG30456
Naprt	CG17119	CG15117	CG17119	CG15117	CG30467	CG30466
Tis11	CG17129	CG1513	CG17129	CG1513	CG30496	CG30467
Tspo	CG17141	CG15141	CG17141	CG15141	CG3077	CG30496
CG8545	CG17202	CG15160	CG17202	CG15160	CG3085	CG3077
Rox8	CG17221	CG15209	CG17221	CG15209	CG3091	CG3085
CG31729	CG17224	CG1529	CG17224	CG1529	CG31038	CG3091
Arpc2	CG17230	CG1532	CG17230	CG1532	CG31064	CG31038
trol	CG17233	CG15356	CG17233	CG15356	CG3107	CG31064
ebd1	CG17249	CG1542	CG17249	CG1542	CG31075	CG3107
CG42788	CG17260	CG15435	CG17260	CG15435	CG31098	CG31075
CG18659	CG17265	CG15439	CG17265	CG15439	CG31122	CG31098
CG2765	CG17271	CG1544	CG17271	CG1544	CG31126	CG31122
mib2	CG17278	CG15440	CG17278	CG15440	CG31145	CG31126
CG10543	CG17292	CG15445	CG17292	CG15445	CG31195	CG31145
tum	CG17294	CG15561	CG17294	CG15561	CG31224	CG31195
CG7766	CG17337	CG15611	CG17337	CG15611	CG31249	CG31224
B4	CG17385	CG15625	CG17385	CG15625	CG31301	CG31249
CG7956	CG17454	CG15695	CG17454	CG15695	CG31324	CG31301
La	CG17486	CG15715	CG17486	CG15715	CG31342	CG31324
Chd1	CG17508	CG1572	CG17508	CG1572	CG31344	CG31342
CG4266	CG17514	CG15744	CG17514	CG15744	CG31357	CG31344
CG8230	CG17528	CG15747	CG17528	CG15747	CG31368	CG31357
CG31342	CG17544	CG15771	CG17544	CG15771	CG31370	CG31368
DnaJ-1	CG17556	CG15784	CG17556	CG15784	CG31388	CG31370
GlyS	CG17574	CG15812	CG17574	CG15812	CG31436	CG31388
Cyp9c1	CG17598	CG15814	CG17598	CG15814	CG31457	CG31436
scny	CG17612	CG15890	CG17612	CG15890	CG31510	CG31457
Nup154	CG1764	CG15891	CG1764	CG15891	CG31522	CG31510
Patronin	CG17660	CG1598	CG17660	CG1598	CG31523	CG31522
l(2)09851	CG17683	CG1603	CG17683	CG1603	CG3163	CG31523
htk	CG17691	CG1622	CG17691	CG1622	CG31635	CG3163
Hlc	CG17698	CG1628	CG17698	CG1628	CG31637	CG31635
ZAP3	CG17712	CG1636	CG17712	CG1636	CG3164	CG31637
Aps	CG17726	CG1637	CG17726	CG1637	CG31648	CG3164
Cirl	CG17734	CG1640	CG17734	CG1640	CG3165	CG31648
pic	CG17746	CG1646	CG17746	CG1646	CG31678	CG3165
Trx-2	CG17754	CG1647	CG17754	CG1647	CG3168	CG31678
spin	CG17760	CG1662	CG17760	CG1662	CG31688	CG3168
CG9646	CG17765	CG1671	CG17765	CG1671	CG31689	CG31688
nrv1	CG17841	CG16711	CG17841	CG16711	CG31694	CG31689
Lac	CG17883	CG16717	CG17883	CG16717	CG31705	CG31694
nonC	CG1789	CG16721	CG1789	CG16721	CG31717	CG31705
wdp	CG17896	CG1673	CG17896	CG1673	CG31729	CG31717
CG16974	CG17982	CG16734	CG17982	CG16734	CG31751	CG31729
RpA-70	CG17985	CG16753	CG17985	CG16753	CG31759	CG31751
Dlg5	CG18011	CG1677	CG18011	CG1677	CG31800	CG31759
Chro	CG18048	CG16787	CG18048	CG16787	CG31812	CG31800
Pgm2a	CG18081	CG16791	CG18081	CG16791	CG31886	CG31812
Ip259	CG1812	CG16812	CG1812	CG16812	CG31908	CG31886
CG31694	CG18135	CG16868	CG18135	CG16868	CG31998	CG31908
Nopp140	CG1815	CG16890	CG1815	CG16890	CG32032	CG31998
Ythdc1	CG18178	CG16903	CG18178	CG16903	CG32066	CG32032
Gug	CG18190	CG16908	CG18190	CG16908	CG32075	CG32066
enc	CG1827	CG16952	CG1827	CG16952	CG32095	CG32075
peng	CG18343	CG16953	CG18343	CG16953	CG32104	CG32095
CG11537	CG18476	CG16972	CG18476	CG16972	CG32112	CG32104
CG7546	CG18528	CG16989	CG18528	CG16989	CG32115	CG32112
Dip-B	CG18547	CG17002	CG18547	CG17002	CG32170	CG32115
Bap111	CG18549	CG17019	CG18549	CG17019	CG3224	CG32170
CG7556	CG18557	CG1703	CG18557	CG1703	CG32264	CG3224
TRAM	CG18596	CG17068	CG18596	CG17068	CG32276	CG32264
Trc8	CG18600	CG17078	CG18600	CG17078	CG32344	CG32276
Jwa	CG18659	CG17119	CG18659	CG17119	CG32368	CG32344
Rab1	CG18661	CG17129	CG18661	CG17129	CG32369	CG32368
dl	CG18766	CG17141	CG18766	CG17141	CG32409	CG32369
CG8677	CG18809	CG17202	CG18809	CG17202	CG32425	CG32409
und	CG18815	CG17221	CG18815	CG17221	CG32428	CG32425
Ranbp21	CG1882	CG17224	CG1882	CG17224	CG32473	CG32428
cDIP	CG1888	CG17230	CG1888	CG17230	CG32512	CG32473
smt3	CG1890	CG17233	CG1890	CG17233	CG32521	CG32512
Moca-cyp	CG1896	CG17249	CG1896	CG17249	CG32576	CG32521
LysRS	CG1902	CG17265	CG1902	CG17265	CG32579	CG32576
sti	CG1907	CG17271	CG1907	CG17271	CG3262	CG32579
Gdi	CG1910	CG17278	CG1910	CG17278	CG32687	CG3262
dikar	CG1927	CG17292	CG1927	CG17292	CG32758	CG32687
pnut	CG1943	CG17333	CG1943	CG17333	CG32767	CG32758
sgg	CG1951	CG17337	CG1951	CG17337	CG32772	CG32767
JhI-26	CG1998	CG1737	CG1998	CG1737	CG3295	CG32772
ScsbetaA	CG2004	CG17385	CG2004	CG17385	CG32982	CG3295
CG10737	CG2006	CG17486	CG2006	CG17486	CG3308	CG32982
AP-1-2beta	CG2017	CG17508	CG2017	CG17508	CG3309	CG3308
CG4552	CG2023	CG17514	CG2023	CG17514	CG33090	CG3309
Hex-A	CG2059	CG17528	CG2059	CG17528	CG33111	CG33090
Ide	CG2064	CG17544	CG2064	CG17544	CG33129	CG33111
THADA	CG2065	CG17556	CG2065	CG17556	CG33144	CG33129
hep	CG2076	CG17574	CG2076	CG17574	CG33229	CG33144
scyl	CG2091	CG17593	CG2091	CG17593	CG33298	CG33229
Ubr3	CG2116	CG1764	CG2116	CG1764	CG3335	CG33298
Gbeta13F	CG2124	CG17660	CG2124	CG17660	CG3337	CG3335
CG5554	CG2162	CG17734	CG2162	CG17734	CG3348	CG3337
coro	CG2186	CG17746	CG2186	CG17746	CG33506	CG3348
CG3356	CG2199	CG17754	CG2199	CG17754	CG33523	CG33506
Cat	CG2201	CG17760	CG2201	CG17760	CG3356	CG33523
PAPLA1	CG2211	CG17765	CG2211	CG17765	CG3358	CG3356
CG12065	CG2218	CG17841	CG2218	CG17841	CG3368	CG3358
CG4360	CG2224	CG1785	CG2224	CG1785	CG33695	CG3368
Fim	CG2225	CG1789	CG2225	CG1789	CG3376	CG33695
Ire1	CG2246	CG17896	CG2246	CG17896	CG33774	CG3376
Pde11	CG2258	CG17985	CG2258	CG17985	CG3386	CG33774
tral	CG2260	CG18004	CG2260	CG18004	CG33977	CG3386
Su(dx)	CG2277	CG18011	CG2277	CG18011	CG3402	CG33977
CG1416	CG2310	CG18048	CG2310	CG18048	CG3408	CG3402
Rif1	CG2493	CG18081	CG2493	CG18081	CG34125	CG3408
row	CG2519	CG18088	CG2519	CG18088	CG34126	CG34125
Eb1	CG2685	CG18135	CG2685	CG18135	CG34132	CG34126
Cul1	CG2701	CG1814	CG2701	CG1814	CG34133	CG34132
Myb	CG2747	CG1815	CG2747	CG1815	CG34159	CG34133
Nup214	CG2765	CG18190	CG2765	CG18190	CG34194	CG34159
mld	CG2767	CG18213	CG2767	CG18213	CG34195	CG34194
Myc	CG2790	CG1824	CG2790	CG1824	CG3420	CG34195
Pcf11	CG2794	CG1827	CG2794	CG1827	CG34200	CG3420
Rcc1	CG2811	CG18324	CG2811	CG18324	CG3434	CG34200
Rev1	CG2818	CG18343	CG2818	CG18343	CG3436	CG3434
mor	CG2841	CG1847	CG2841	CG1847	CG34376	CG3436
milt	CG2846	CG18476	CG2846	CG18476	CG34383	CG34376
Pde8	CG2852	CG18528	CG2852	CG18528	CG34401	CG34383
Iswi	CG2862	CG18547	CG2862	CG18547	CG34404	CG34401
CG3368	CG2865	CG18549	CG2865	CG18549	CG34417	CG34404
CG4887	CG2875	CG18596	CG2875	CG18596	CG3500	CG34417
Eip75B	CG2889	CG18600	CG2889	CG18600	CG3520	CG3500
Mbs	CG2906	CG18659	CG2906	CG18659	CG3529	CG3520
nsl1	CG2915	CG18661	CG2915	CG18661	CG3530	CG3529
ergic53	CG2918	CG18731	CG2918	CG18731	CG3542	CG3530
kcc	CG2924	CG18766	CG2924	CG18766	CG3552	CG3542
Bacc	CG2926	CG18809	CG2926	CG18809	CG3558	CG3552
Vha100-1	CG2930	CG18815	CG2930	CG18815	CG3566	CG3558
Rme-8	CG2991	CG1882	CG2991	CG1882	CG3594	CG3566
PNUTS	CG30015	CG18870	CG30015	CG18870	CG3618	CG3594
asRNA:CR44969	CG30020	CG1888	CG30020	CG1888	CG3626	CG3618
CenB1A	CG30022	CG1890	CG30022	CG1890	CG3631	CG3626
XNP	CG30069	CG1902	CG30069	CG1902	CG3632	CG3631
CG11873	CG3008	CG1907	CG3008	CG1907	CG3634	CG3632
tna	CG30089	CG1910	CG30089	CG1910	CG3635	CG3634
Cyp1	CG30109	CG1927	CG30109	CG1927	CG3638	CG3635
deltaCOP	CG30122	CG1943	CG30122	CG1943	CG3645	CG3638
tapas	CG30159	CG1951	CG30159	CG1951	CG3651	CG3645
ago	CG30183	CG1998	CG30183	CG1998	CG3662	CG3651
Itp-r83A	CG30187	CG2006	CG30187	CG2006	CG3663	CG3662
CycT	CG30291	CG2017	CG30291	CG2017	CG3703	CG3663
Mcr	CG30344	CG2023	CG30344	CG2023	CG3709	CG3703
Rpn6	CG30349	CG2034	CG30349	CG2034	CG3726	CG3709
SCaMC	CG30389	CG2061	CG30389	CG2061	CG3732	CG3726
Fkbp59	CG30392	CG2064	CG30392	CG2064	CG3735	CG3732
Nop56	CG30394	CG2065	CG30394	CG2065	CG3740	CG3735
glu	CG3040	CG2076	CG3040	CG2076	CG3756	CG3740
AP-2alpha	CG30423	CG2091	CG30423	CG2091	CG3760	CG3756
GstE9	CG3045	CG2116	CG3045	CG2116	CG3764	CG3760
Usp15-31	CG30456	CG2124	CG30456	CG2124	CG3776	CG3764
Ars2	CG30466	CG2126	CG30466	CG2126	CG3781	CG3776
CG13096	CG30467	CG2147	CG30467	CG2147	CG3788	CG3781
Pdk1	CG30496	CG2162	CG30496	CG2162	CG3808	CG3788
mei-P26	CG3077	CG2182	CG3077	CG2182	CG3860	CG3808
vap	CG3085	CG2186	CG3085	CG2186	CG3862	CG3860
cnc	CG3091	CG2199	CG3091	CG2199	CG3902	CG3862
Nipped-B	CG31038	CG2200	CG31038	CG2200	CG3907	CG3902
RhoGAP16F	CG31064	CG2201	CG31064	CG2201	CG3919	CG3907
CG1815	CG3107	CG2202	CG3107	CG2202	CG3939	CG3919
akirin	CG31075	CG2211	CG31075	CG2211	CG3961	CG3939
Herc4	CG31098	CG2224	CG31098	CG2224	CG3995	CG3961
eIF2alpha	CG31122	CG2225	CG31122	CG2225	CG40045	CG3995
Vap33	CG31126	CG2260	CG31126	CG2260	CG4022	CG40045
Lamp1	CG31142	CG2277	CG31142	CG2277	CG4036	CG4022
CG2493	CG31145	CG2310	CG31145	CG2310	CG4038	CG4036
flfl	CG31156	CG2493	CG31156	CG2493	CG4042	CG4038
Ugt302C1	CG31195	CG2519	CG31195	CG2519	CG4069	CG4042
Sar1	CG31211	CG2614	CG31211	CG2614	CG4078	CG4069
Tpr2	CG31224	CG2656	CG31224	CG2656	CG4080	CG4078
ncm	CG31249	CG2662	CG31249	CG2662	CG4199	CG4080
gry	CG31301	CG2685	CG31301	CG2685	CG42232	CG4199
pnr	CG31323	CG2691	CG31323	CG2691	CG42238	CG42232
srl	CG31324	CG2698	CG31324	CG2698	CG42240	CG42238
CG6051	CG31342	CG2747	CG31342	CG2747	CG42258	CG42240
bin3	CG31344	CG2765	CG31344	CG2765	CG42271	CG42258
Rok	CG31357	CG2767	CG31357	CG2767	CG4230	CG42271
Got1	CG31365	CG2794	CG31365	CG2794	CG42327	CG4230
CG17544	CG31368	CG2811	CG31368	CG2811	CG42336	CG42327
garz	CG31370	CG2818	CG31370	CG2818	CG42360	CG42336
CG9705	CG31388	CG2852	CG31388	CG2852	CG4238	CG42360
mars	CG31436	CG2862	CG31436	CG2862	CG42390	CG4238
Scsalpha1	CG31457	CG2865	CG31457	CG2865	CG42445	CG42390
NSD	CG31510	CG2875	CG31510	CG2875	CG42458	CG42445
Ns2	CG31522	CG2889	CG31522	CG2889	CG42514	CG42458
CG1673	CG31523	CG2909	CG31523	CG2909	CG42526	CG42514
LPCAT	CG31549	CG2915	CG31549	CG2915	CG42542	CG42526
Zw10	CG31550	CG2918	CG31550	CG2918	CG42553	CG42542
Gapvd1	CG3163	CG2924	CG3163	CG2924	CG42588	CG42553
Gp210	CG31635	CG2926	CG31635	CG2926	CG4266	CG42588
Ets21C	CG31637	CG2930	CG31637	CG2930	CG42663	CG4266
l(3)L1231	CG31638	CG2931	CG31638	CG2931	CG42668	CG42663
Ankle2	CG3164	CG2938	CG3164	CG2938	CG42672	CG42668
CG14767	CG31648	CG2991	CG31648	CG2991	CG42673	CG42672
Wnk	CG3165	CG30015	CG3165	CG30015	CG42674	CG42673
mop	CG31650	CG30020	CG31650	CG30020	CG42675	CG42674
AP-1gamma	CG31673	CG30022	CG31673	CG30022	CG42676	CG42675
CG1582	CG31678	CG30069	CG31678	CG30069	CG42684	CG42676
Fkbp14	CG3168	CG3008	CG3168	CG3008	CG42699	CG42684
cv-d	CG31688	CG30089	CG31688	CG30089	CG42709	CG42699
asRNA:CR45835	CG31689	CG30108	CG31689	CG30108	CG42724	CG42709
obe	CG31694	CG30122	CG31694	CG30122	CG42748	CG42724
pps	CG31705	CG30159	CG31705	CG30159	CG42788	CG42748
vig2	CG31712	CG30291	CG31712	CG30291	CG42797	CG42788
Ptp61F	CG31717	CG30344	CG31717	CG30344	CG42806	CG42797
TBCD	CG31729	CG30389	CG31729	CG30389	CG4281	CG42806
E(bx)	CG31751	CG30392	CG31751	CG30392	CG4287	CG4281
Tango1	CG31759	CG30394	CG31759	CG30394	CG4291	CG4287
CG5789	CG31777	CG3040	CG31777	CG3040	CG4293	CG4291
CG9372	CG31800	CG30423	CG31800	CG30423	CG4297	CG4293
Pino	CG31812	CG3045	CG31812	CG3045	CG43340	CG4297
CG7430	CG31855	CG30456	CG31855	CG30456	CG4364	CG43340
CG7029	CG31886	CG30466	CG31886	CG30466	CG43658	CG4364
feo	CG31908	CG30467	CG31908	CG30467	CG43736	CG43658
Elys	CG31998	CG30496	CG31998	CG30496	CG43783	CG43736
CG5522	CG32032	CG3077	CG32032	CG3077	CG4390	CG43783
CG8963	CG32066	CG3085	CG32066	CG3085	CG4452	CG4390
CG11790	CG32075	CG3091	CG32075	CG3091	CG44774	CG4452
CG17746	CG32095	CG31038	CG32095	CG31038	CG4496	CG44774
r	CG32100	CG31064	CG32100	CG31064	CG4502	CG4496
Pglym78	CG32104	CG3107	CG32104	CG3107	CG45049	CG4502
kug	CG32109	CG31075	CG32109	CG31075	CG45050	CG45049
ttk	CG32112	CG31098	CG32112	CG31098	CG45071	CG45050
Src42A	CG32115	CG31122	CG32115	CG31122	CG4511	CG45071
CG6695	CG32170	CG31126	CG32170	CG31126	CG4538	CG4511
CG42671	CG32176	CG31145	CG32176	CG31145	CG4552	CG4538
Rab10	CG3224	CG31195	CG3224	CG31195	CG4553	CG4552
CG34126	CG32264	CG31224	CG32264	CG31224	CG4554	CG4553
Dys	CG32276	CG31249	CG32276	CG31249	CG4572	CG4554
vig	CG32280	CG31301	CG32280	CG31301	CG4593	CG4572
Diap2	CG32344	CG31324	CG32344	CG31324	CG4598	CG4593
SRPK	CG32368	CG31342	CG32368	CG31342	CG4603	CG4598
Lpin	CG32369	CG31344	CG32369	CG31344	CG4610	CG4603
His2Av	CG32409	CG31357	CG32409	CG31357	CG4622	CG4610
Rab5	CG32425	CG31368	CG32425	CG31368	CG46280	CG4622
Tfb1	CG32428	CG31370	CG32428	CG31370	CG4629	CG46280
Mlf	CG3246	CG31388	CG3246	CG31388	CG4630	CG4629
ca	CG32473	CG31436	CG32473	CG31436	CG46385	CG4630
Pfas	CG32485	CG31441	CG32485	CG31441	CG4658	CG46385
CG2182	CG32486	CG31457	CG32486	CG31457	CG4662	CG4658
DppIII	CG32512	CG3149	CG32512	CG3149	CG4679	CG4662
Tsr1	CG32521	CG31510	CG32521	CG31510	CG4751	CG4679
Pngl	CG32549	CG31522	CG32549	CG31522	CG4806	CG4751
Dcr-2	CG32576	CG31523	CG32576	CG31523	CG4822	CG4806
Mob2	CG32579	CG3163	CG32579	CG3163	CG4825	CG4822
CrebA	CG3262	CG31635	CG3262	CG31635	CG4860	CG4825
sbb	CG32687	CG31637	CG32687	CG31637	CG4882	CG4860
PlexA	CG3270	CG3164	CG3270	CG3164	CG4887	CG4882
asRNA:CR45350	CG32758	CG31648	CG32758	CG31648	CG4896	CG4887
Hexo2	CG32767	CG3165	CG32767	CG3165	CG4908	CG4896
mfas	CG32772	CG31678	CG32772	CG31678	CG4968	CG4908
pod1	CG32813	CG3168	CG32813	CG3168	CG4970	CG4968
rump	CG32850	CG31688	CG32850	CG31688	CG5004	CG4970
CG44774	CG3295	CG31689	CG3295	CG31689	CG5009	CG5004
D1	CG32982	CG31694	CG32982	CG31694	CG5021	CG5009
Mkp3	CG33056	CG31705	CG33056	CG31705	CG5045	CG5021
Smg6	CG3308	CG31717	CG3308	CG31717	CG5056	CG5045
Dhx15	CG3309	CG31729	CG3309	CG31729	CG5059	CG5056
BtbVII	CG33090	CG31751	CG33090	CG31751	CG5068	CG5059
Caf1-55	CG33107	CG31759	CG33107	CG31759	CG5087	CG5068
Pgant5	CG33111	CG31793	CG33111	CG31793	CG5114	CG5087
Spt6	CG33129	CG31800	CG33129	CG31800	CG5149	CG5114
asRNA:CR46067	CG33144	CG31812	CG33144	CG31812	CG5151	CG5149
rgr	CG33170	CG31886	CG33170	CG31886	CG5181	CG5151
Dp	CG33229	CG31908	CG33229	CG31908	CG5191	CG5181
CG5953	CG33298	CG31915	CG33298	CG31915	CG5196	CG5191
Srp68	CG3335	CG31937	CG3335	CG31937	CG5235	CG5196
Jarid2	CG3337	CG3198	CG3337	CG3198	CG5273	CG5235
blow	CG3348	CG31998	CG3348	CG31998	CG5274	CG5273
RnrL	CG33506	CG32022	CG33506	CG32022	CG5276	CG5274
cathD	CG33523	CG32032	CG33523	CG32032	CG5290	CG5276
kto	CG3356	CG32066	CG3356	CG32066	CG5292	CG5290
CG8176	CG3358	CG32075	CG3358	CG32075	CG5316	CG5292
Ahcy	CG3368	CG32095	CG3368	CG32095	CG5323	CG5316
Mapmodulin	CG33695	CG32104	CG33695	CG32104	CG5335	CG5323
VhaAC45	CG3376	CG32112	CG3376	CG32112	CG5346	CG5335
CG17278	CG33774	CG32115	CG33774	CG32115	CG5359	CG5346
l(2)k05819	CG3386	CG32170	CG3386	CG32170	CG5380	CG5359
pbl	CG33926	CG32221	CG33926	CG32221	CG5382	CG5380
cbt	CG33977	CG3224	CG33977	CG3224	CG5399	CG5382
SF1	CG3402	CG3225	CG3402	CG3225	CG5445	CG5399
eIF3k	CG3408	CG3226	CG3408	CG3226	CG5447	CG5445
Liprin-beta	CG34125	CG32264	CG34125	CG32264	CG5500	CG5447
Men-b	CG34126	CG32276	CG34126	CG32276	CG5504	CG5500
mon2	CG34132	CG32344	CG34132	CG32344	CG5510	CG5504
gro	CG34133	CG32368	CG34133	CG32368	CG5521	CG5510
Dsp1	CG34159	CG32369	CG34159	CG32369	CG5522	CG5521
TppII	CG34194	CG32409	CG34194	CG32409	CG5532	CG5522
Hmt-1	CG34195	CG32425	CG34195	CG32425	CG5535	CG5532
Sos	CG3420	CG32428	CG3420	CG32428	CG5555	CG5535
trx	CG34200	CG32441	CG34200	CG32441	CG5590	CG5555
CG46280	CG3434	CG32473	CG3434	CG32473	CG5611	CG5590
CG9932	CG34357	CG3251	CG34357	CG3251	CG5641	CG5611
EMC1	CG3436	CG32512	CG3436	CG32512	CG5664	CG5641
lgs	CG34376	CG32521	CG34376	CG32521	CG5674	CG5664
Ack	CG34383	CG32576	CG34383	CG32576	CG5676	CG5674
asRNA:CR43730	CG34401	CG32579	CG34401	CG32579	CG5694	CG5676
Adk2	CG34404	CG3262	CG34404	CG3262	CG5721	CG5694
CG7611	CG34408	CG32687	CG34408	CG32687	CG5726	CG5721
Mdh2	CG34417	CG32708	CG34417	CG32708	CG5728	CG5726
flr	CG34449	CG32758	CG34449	CG32758	CG5734	CG5728
mamo	CG3500	CG32767	CG3500	CG32767	CG5742	CG5734
CG16903	CG3511	CG32772	CG3511	CG32772	CG5746	CG5742
eIF1A	CG3520	CG3281	CG3520	CG3281	CG5776	CG5746
DCP2	CG3529	CG3295	CG3529	CG3295	CG5787	CG5776
CG10600	CG3530	CG32982	CG3530	CG32982	CG5789	CG5787
CG2076	CG3542	CG33051	CG3542	CG33051	CG5805	CG5789
CG7920	CG3552	CG3308	CG3552	CG3308	CG5815	CG5805
Csk	CG3558	CG3309	CG3558	CG3309	CG5823	CG5815
Xpc	CG3566	CG33090	CG3566	CG33090	CG5830	CG5823
ocm	CG3594	CG33111	CG3594	CG33111	CG5835	CG5830
Rop	CG3609	CG33116	CG3609	CG33116	CG5850	CG5835
l(3)mbt	CG3618	CG33129	CG3618	CG33129	CG5853	CG5850
Shmt	CG3626	CG33144	CG3626	CG33144	CG5854	CG5853
Rpt1	CG3631	CG33156	CG3631	CG33156	CG5861	CG5854
Zcchc7	CG3632	CG33158	CG3632	CG33158	CG5862	CG5861
xmas	CG3634	CG33229	CG3634	CG33229	CG5877	CG5862
BicD	CG3635	CG33298	CG3635	CG33298	CG5880	CG5877
Snx3	CG3638	CG33303	CG3638	CG33303	CG5903	CG5880
GlnRS	CG3645	CG3335	CG3645	CG3335	CG5913	CG5903
KdelR	CG3651	CG3337	CG3651	CG3337	CG5946	CG5913
CG42324	CG3662	CG3348	CG3662	CG3348	CG5953	CG5946
2021-09-01	CG3663	CG33494	CG3663	CG33494	CG5958	CG5953
MESR3	CG3703	CG33506	CG3703	CG33506	CG5986	CG5958
Drp1	CG3709	CG33523	CG3709	CG33523	CG5989	CG5986
fdl	CG3719	CG3356	CG3719	CG3356	CG6040	CG5989
PHGPx	CG3726	CG3358	CG3726	CG3358	CG6051	CG6040
galectin	CG3732	CG3368	CG3732	CG3368	CG6071	CG6051
Sh3beta	CG3735	CG33695	CG3735	CG33695	CG6073	CG6071
CG13384	CG3740	CG3376	CG3740	CG3376	CG6084	CG6073
CG7878	CG3744	CG33774	CG3744	CG33774	CG6115	CG6084
Srp54	CG3756	CG3386	CG3756	CG3386	CG6145	CG6115
TM9SF2	CG3760	CG33969	CG3760	CG33969	CG6163	CG6145
cl	CG3764	CG33977	CG3764	CG33977	CG6175	CG6163
CG9917	CG3776	CG3402	CG3776	CG3402	CG6178	CG6175
Gart	CG3781	CG3408	CG3781	CG3408	CG6218	CG6178
bur	CG3788	CG34125	CG3788	CG34125	CG6230	CG6218
CycK	CG3793	CG34126	CG3793	CG34126	CG6231	CG6230
Nurf-38	CG3808	CG34132	CG3808	CG34132	CG6293	CG6231
Pak3	CG3860	CG34133	CG3860	CG34133	CG6310	CG6293
RpII140	CG3862	CG34159	CG3862	CG34159	CG6325	CG6310
Sec24AB	CG3902	CG34194	CG3902	CG34194	CG6330	CG6325
Tapdelta	CG3907	CG34195	CG3907	CG34195	CG6340	CG6330
ATPsynB	CG3909	CG3420	CG3909	CG3420	CG6420	CG6340
CkIalpha	CG3919	CG34200	CG3919	CG34200	CG6425	CG6420
Sec13	CG3939	CG3434	CG3939	CG3434	CG6428	CG6425
l(2)k09022	CG3961	CG34347	CG3961	CG34347	CG6443	CG6428
CG9776	CG3995	CG34348	CG3995	CG34348	CG6479	CG6443
CoRest	CG4004	CG3436	CG4004	CG3436	CG6488	CG6479
lncRNA:Hsromega	CG40045	CG34376	CG40045	CG34376	CG6512	CG6488
sau	CG4022	CG34383	CG4022	CG34383	CG6607	CG6512
DNApol-iota	CG4036	CG34401	CG4036	CG34401	CG6621	CG6607
Akt1	CG4038	CG34404	CG4038	CG34404	CG6659	CG6621
Ost48	CG4042	CG34417	CG4042	CG34417	CG6664	CG6659
PDZ-GEF	CG4069	CG3448	CG4069	CG3448	CG6693	CG6664
asRNA:CR45798	CG4078	CG3500	CG4078	CG3500	CG6700	CG6693
pita	CG4080	CG3505	CG4080	CG3505	CG6701	CG6700
shi	CG41099	CG3520	CG41099	CG3520	CG6707	CG6701
RanBPM	CG4199	CG3529	CG4199	CG3529	CG6712	CG6707
PAN2	CG42232	CG3530	CG42232	CG3530	CG6724	CG6712
Vps4	CG42238	CG3542	CG42238	CG3542	CG6729	CG6724
Pdha	CG42239	CG3552	CG42239	CG3552	CG6766	CG6729
l(3)05822	CG42240	CG3558	CG42240	CG3558	CG6767	CG6766
puc	CG42258	CG3566	CG42258	CG3566	CG6770	CG6767
Vrp1	CG42271	CG3589	CG42271	CG3589	CG6805	CG6770
rod	CG4230	CG3594	CG4230	CG3594	CG6833	CG6805
smid	CG42324	CG3618	CG42324	CG3618	CG6843	CG6833
Ack-like	CG42327	CG3626	CG42327	CG3626	CG6845	CG6843
Ggamma1	CG42336	CG3631	CG42336	CG3631	CG6878	CG6845
Arp2	CG42360	CG3632	CG42360	CG3632	CG6891	CG6878
Sec16	CG4238	CG3634	CG4238	CG3634	CG6907	CG6891
CG32276	CG42390	CG3635	CG42390	CG3635	CG6928	CG6907
DCTN1-p150	CG42445	CG3638	CG42445	CG3638	CG6966	CG6928
egr	CG42458	CG3645	CG42458	CG3645	CG6967	CG6966
CG12477	CG42514	CG3651	CG42514	CG3651	CG6983	CG6967
CG4825	CG42526	CG3652	CG42526	CG3652	CG7006	CG6983
cno	CG42542	CG3662	CG42542	CG3662	CG7011	CG7006
pins	CG42553	CG3663	CG42553	CG3663	CG7028	CG7011
CG12084	CG42588	CG3700	CG42588	CG3700	CG7029	CG7028
Pi3K92E	CG4259	CG3702	CG4259	CG3702	CG7049	CG7029
pcm	CG4266	CG3703	CG4266	CG3703	CG7054	CG7049
CG11414	CG42663	CG3709	CG42663	CG3709	CG7099	CG7054
Cand1	CG42668	CG3726	CG42668	CG3726	CG7110	CG7099
Ehbp1	CG42671	CG3732	CG42671	CG3732	CG7115	CG7110
cv-2	CG42672	CG3735	CG42672	CG3735	CG7130	CG7115
CG1371	CG42673	CG3740	CG42673	CG3740	CG7133	CG7130
CG5290	CG42674	CG3756	CG42674	CG3756	CG7137	CG7133
zf30C	CG42675	CG3760	CG42675	CG3760	CG7168	CG7137
CG17233	CG42676	CG3764	CG42676	CG3764	CG7182	CG7168
Hsp68	CG42684	CG3776	CG42684	CG3776	CG7206	CG7182
Gclc	CG42699	CG3781	CG42699	CG3781	CG7218	CG7206
mtd	CG42709	CG3788	CG42709	CG3788	CG7220	CG7218
Ubi-p63E	CG42724	CG3792	CG42724	CG3792	CG7246	CG7220
CG5787	CG42748	CG3808	CG42748	CG3808	CG7255	CG7246
l(1)G0007	CG42788	CG3817	CG42788	CG3817	CG7272	CG7255
Pabp2	CG42797	CG3847	CG42797	CG3847	CG7275	CG7272
Mondo	CG42806	CG3860	CG42806	CG3860	CG7289	CG7275
Pi4KIIalpha	CG4281	CG3862	CG4281	CG3862	CG7324	CG7289
Br140	CG4287	CG3902	CG4287	CG3902	CG7369	CG7324
CG1890	CG4291	CG3907	CG4291	CG3907	CG7372	CG7369
CG6907	CG4293	CG3918	CG4293	CG3918	CG7379	CG7372
CG14478	CG4297	CG3919	CG4297	CG3919	CG7394	CG7379
Spn88Ea	CG43340	CG3939	CG43340	CG3939	CG7414	CG7394
Cse1	CG4364	CG3961	CG4364	CG3961	CG7420	CG7414
CG1358	CG43658	CG3995	CG43658	CG3995	CG7430	CG7420
Prosap	CG43736	CG40045	CG43736	CG40045	CG7457	CG7430
CG5535	CG43783	CG40191	CG43783	CG40191	CG7484	CG7457
unc-5	CG43867	CG4022	CG43867	CG4022	CG7492	CG7484
l(2)k01209	CG4390	CG4036	CG4390	CG4036	CG7506	CG7492
Hcf	CG44250	CG4038	CG44250	CG4038	CG7518	CG7506
CG1646	CG44325	CG4041	CG44325	CG4041	CG7523	CG7518
Nplp2	CG4452	CG4042	CG4452	CG4042	CG7530	CG7523
bai	CG44774	CG4045	CG44774	CG4045	CG7544	CG7530
CG10527	CG44838	CG4069	CG44838	CG4069	CG7546	CG7544
Shc	CG4496	CG4078	CG4496	CG4078	CG7564	CG7546
CG34401	CG4502	CG4080	CG4502	CG4080	CG7565	CG7564
CG6293	CG45049	CG4098	CG45049	CG4098	CG7600	CG7565
cwo	CG45050	CG4101	CG45050	CG4101	CG7601	CG7600
shtd	CG45071	CG4119	CG45071	CG4119	CG7611	CG7601
Upf1	CG4511	CG4199	CG4511	CG4199	CG7627	CG7611
Cont	CG45263	CG4210	CG45263	CG4210	CG7637	CG7627
BRWD3	CG4538	CG42232	CG4538	CG42232	CG7639	CG7637
Rac1	CG4552	CG42238	CG4552	CG42238	CG7650	CG7639
SPoCk	CG4553	CG42240	CG4553	CG42240	CG7655	CG7650
ebi	CG4554	CG42258	CG4554	CG42258	CG7656	CG7655
CG11961	CG4572	CG42271	CG4572	CG42271	CG7668	CG7656
RtGEF	CG4593	CG4230	CG4593	CG4230	CG7692	CG7668
Lon	CG4598	CG42327	CG4598	CG42327	CG7737	CG7692
trbl	CG4603	CG42336	CG4603	CG42336	CG7739	CG7737
CG7971	CG4610	CG42360	CG4610	CG42360	CG7744	CG7739
stx	CG4622	CG4238	CG4622	CG4238	CG7745	CG7744
Nlp	CG46280	CG4239	CG46280	CG4239	CG7789	CG7745
eEF1delta	CG4629	CG42390	CG4629	CG42390	CG7800	CG7789
lark	CG4630	CG42445	CG4630	CG42445	CG7806	CG7800
Mlc-c	CG46385	CG42458	CG46385	CG42458	CG7824	CG7806
GstD1	CG4658	CG42514	CG4658	CG42514	CG7840	CG7824
Spn	CG4662	CG42526	CG4662	CG42526	CG7878	CG7840
TyrRS	CG4679	CG42542	CG4679	CG42542	CG7920	CG7878
skd	CG4743	CG42553	CG4743	CG42553	CG7945	CG7920
Cka	CG4751	CG42588	CG4751	CG42588	CG7956	CG7945
pav	CG4768	CG4266	CG4768	CG4266	CG7970	CG7956
MED14	CG4806	CG42663	CG4806	CG42663	CG7971	CG7970
RFeSP	CG4813	CG42668	CG4813	CG42668	CG7987	CG7971
sbr	CG4822	CG42672	CG4822	CG42672	CG8001	CG7987
CG8405	CG4825	CG42673	CG4825	CG42673	CG8031	CG8001
COX5A	CG4860	CG42674	CG4860	CG42674	CG8032	CG8031
Cap-G	CG4882	CG42675	CG4882	CG42675	CG8036	CG8032
Fkbp12	CG4887	CG42676	CG4887	CG42676	CG8038	CG8036
Madm	CG4896	CG42684	CG4896	CG42684	CG8046	CG8038
Tnpo	CG4908	CG42699	CG4908	CG42699	CG8067	CG8046
Stam	CG4911	CG42709	CG4911	CG42709	CG8108	CG8067
CG10321	CG4951	CG42724	CG4951	CG42724	CG8112	CG8108
Usp2	CG4953	CG42748	CG4953	CG42748	CG8128	CG8112
Hsp27	CG4968	CG42788	CG4968	CG42788	CG8149	CG8128
Myo61F	CG4970	CG42797	CG4970	CG42797	CG8176	CG8149
YME1L	CG5001	CG42806	CG5001	CG42806	CG8177	CG8176
brun	CG5003	CG4281	CG5003	CG4281	CG8184	CG8177
spir	CG5004	CG42813	CG5004	CG42813	CG8187	CG8184
tweek	CG5009	CG4287	CG5009	CG4287	CG8188	CG8187
tho2	CG5021	CG4291	CG5021	CG4291	CG8209	CG8188
ATPsynG	CG5027	CG4293	CG5027	CG4293	CG8223	CG8209
Klc	CG5044	CG4294	CG5044	CG4294	CG8243	CG8223
Trf4-1	CG5045	CG4297	CG5045	CG4297	CG8272	CG8243
Kcmf1	CG5056	CG43340	CG5056	CG43340	CG8281	CG8272
Ctr9	CG5059	CG43367	CG5059	CG43367	CG8292	CG8281
pcx	CG5068	CG4338	CG5068	CG4338	CG8298	CG8292
CG17896	CG5087	CG4360	CG5087	CG4360	CG8306	CG8298
Nedd4	CG5112	CG4364	CG5112	CG4364	CG8311	CG8306
spidey	CG5114	CG43658	CG5114	CG43658	CG8312	CG8311
CG8243	CG5149	CG43736	CG5149	CG43736	CG8314	CG8312
CG3702	CG5151	CG43783	CG5151	CG43783	CG8319	CG8314
Cyt-b5	CG5181	CG4390	CG5181	CG4390	CG8326	CG8319
alphaTub84D	CG5191	CG4407	CG5191	CG4407	CG8336	CG8326
luna	CG5196	CG4452	CG5196	CG4452	CG8360	CG8336
Su(var)2-HP2	CG5235	CG44774	CG5235	CG44774	CG8397	CG8360
Cul3	CG5273	CG4496	CG5273	CG4496	CG8405	CG8397
Prosalpha2	CG5274	CG4502	CG5274	CG4502	CG8414	CG8405
lqf	CG5276	CG45049	CG5276	CG45049	CG8441	CG8414
swm	CG5290	CG45050	CG5290	CG45050	CG8468	CG8441
zormin	CG5292	CG45071	CG5292	CG45071	CG8490	CG8468
CG7139	CG5316	CG4511	CG5316	CG4511	CG8500	CG8490
mahj	CG5321	CG4538	CG5321	CG4538	CG8516	CG8500
Nsf2	CG5323	CG4552	CG5323	CG4552	CG8520	CG8516
Scamp	CG5335	CG4553	CG5335	CG4553	CG8531	CG8520
CG2310	CG5346	CG4554	CG5346	CG4554	CG8547	CG8531
AhcyL1	CG5359	CG4558	CG5359	CG4558	CG8569	CG8547
Sgt	CG5380	CG4572	CG5380	CG4572	CG8602	CG8569
Ntf-2	CG5382	CG4587	CG5382	CG4587	CG8611	CG8602
mRpL28	CG5399	CG4593	CG5399	CG4593	CG8613	CG8611
Rpn8	CG5412	CG4598	CG5412	CG4598	CG8617	CG8613
CG7627	CG5445	CG4603	CG5445	CG4603	CG8635	CG8617
MTA1-like	CG5446	CG4610	CG5446	CG4610	CG8668	CG8635
Rad23	CG5447	CG4615	CG5447	CG4615	CG8671	CG8668
kraken	CG5500	CG4622	CG5500	CG4622	CG8675	CG8671
CG2698	CG5504	CG46280	CG5504	CG46280	CG8677	CG8675
CG8188	CG5510	CG4629	CG5510	CG4629	CG8728	CG8677
mxt	CG5521	CG4630	CG5521	CG4630	CG8765	CG8728
shrb	CG5522	CG46339	CG5522	CG46339	CG8768	CG8765
PSR	CG5532	CG46385	CG5532	CG46385	CG8786	CG8768
CG15771	CG5535	CG4645	CG5535	CG4645	CG8833	CG8786
Non2	CG5541	CG4658	CG5541	CG4658	CG8839	CG8833
Mdh1	CG5555	CG4662	CG5555	CG4662	CG8841	CG8839
GM130	CG5590	CG4679	CG5590	CG4679	CG8858	CG8841
RhoGAP15B	CG5611	CG4751	CG5611	CG4751	CG8878	CG8858
edl	CG5641	CG4806	CG5641	CG4806	CG8891	CG8878
Cdk12	CG5664	CG4822	CG5664	CG4822	CG8929	CG8891
CG14696	CG5674	CG4825	CG5674	CG4825	CG8939	CG8929
step	CG5676	CG4853	CG5676	CG4853	CG8963	CG8939
Atg1	CG5694	CG4860	CG5694	CG4860	CG8974	CG8963
CG1354	CG5704	CG4880	CG5704	CG4880	CG9005	CG8974
RpS14b	CG5721	CG4882	CG5721	CG4882	CG9044	CG9005
CycA	CG5726	CG4887	CG5726	CG4887	CG9065	CG9044
Osbp	CG5728	CG4896	CG5728	CG4896	CG9132	CG9065
CG31678	CG5734	CG4908	CG5734	CG4908	CG9135	CG9132
CalpB	CG5742	CG4936	CG5742	CG4936	CG9143	CG9135
Fur2	CG5746	CG4968	CG5746	CG4968	CG9147	CG9143
mfrn	CG5757	CG4970	CG5757	CG4970	CG9171	CG9147
EndoGI	CG5776	CG4972	CG5776	CG4972	CG9175	CG9171
MAPk-Ak2	CG5787	CG5004	CG5787	CG5004	CG9205	CG9175
ZnT63C	CG5789	CG5009	CG5789	CG5009	CG9213	CG9205
GCS2alpha	CG5805	CG5021	CG5805	CG5021	CG9220	CG9213
cnk	CG5815	CG5033	CG5815	CG5033	CG9231	CG9220
crq	CG5823	CG5045	CG5823	CG5045	CG9253	CG9231
mrt	CG5830	CG5056	CG5830	CG5056	CG9300	CG9253
px	CG5835	CG5059	CG5835	CG5059	CG9304	CG9300
CG12054	CG5850	CG5068	CG5850	CG5068	CG9328	CG9304
Golgin245	CG5853	CG5087	CG5853	CG5087	CG9331	CG9328
CG31908	CG5854	CG5098	CG5854	CG5098	CG9346	CG9331
fwd	CG5861	CG5104	CG5861	CG5104	CG9360	CG9346
Hydr2	CG5862	CG5114	CG5862	CG5114	CG9372	CG9360
TfIIA-L	CG5877	CG5149	CG5877	CG5149	CG9391	CG9372
ArfGAP3	CG5880	CG5151	CG5880	CG5151	CG9399	CG9391
Med	CG5888	CG5174	CG5888	CG5174	CG9426	CG9399
RpL24-like	CG5903	CG5180	CG5903	CG5180	CG9436	CG9426
SelD	CG5913	CG5181	CG5913	CG5181	CG9485	CG9436
Wsck	CG5946	CG5191	CG5946	CG5191	CG9547	CG9485
jvl	CG5953	CG5196	CG5953	CG5196	CG9588	CG9547
Ulp1	CG5958	CG5199	CG5958	CG5199	CG9609	CG9588
fru	CG5986	CG5235	CG5986	CG5235	CG9630	CG9609
rig	CG5989	CG5262	CG5989	CG5262	CG9646	CG9630
AcCoAS	CG6028	CG5270	CG6028	CG5270	CG9662	CG9646
mtRNApol	CG6040	CG5273	CG6040	CG5273	CG9663	CG9662
MESR4	CG6051	CG5274	CG6051	CG5274	CG9674	CG9663
Rrp1	CG6071	CG5276	CG6071	CG5276	CG9706	CG9674
CG7457	CG6073	CG5281	CG6073	CG5281	CG9723	CG9706
Pitslre	CG6084	CG5287	CG6084	CG5287	CG9743	CG9723
SdhB	CG6115	CG5290	CG6115	CG5290	CG9775	CG9743
CG11417	CG6145	CG5292	CG6145	CG5292	CG9776	CG9775
Flacc	CG6163	CG5316	CG6163	CG5316	CG9784	CG9776
pns	CG6175	CG5323	CG6175	CG5323	CG9795	CG9784
ND-39	CG6178	CG5335	CG6178	CG5335	CG9799	CG9795
ND-75	CG6218	CG5339	CG6218	CG5339	CG9855	CG9799
Su(var)2-10	CG6227	CG5346	CG6227	CG5346	CG9886	CG9855
CG5033	CG6230	CG5355	CG6230	CG5355	CG9902	CG9886
Uggt	CG6231	CG5359	CG6231	CG5359	CG9915	CG9902
CG12091	CG6293	CG5380	CG6293	CG5380	CG9922	CG9915
Vps13	CG6310	CG5382	CG6310	CG5382	CG9932	CG9922
CG7461	CG6325	CG5399	CG6325	CG5399	CG9934	CG9932
Pmp70	CG6330	CG5439	CG6330	CG5439	CG9945	CG9934
CG8223	CG6340	CG5445	CG6340	CG5445	CG9951	CG9945
Ncoa6	CG6420	CG5447	CG6420	CG5447	CG9986	CG9951
Pat1	CG6425	CG5500	CG6425	CG5500	chb	CG9986
stau	CG6428	CG5504	CG6428	CG5504	Chc	chb
Dlic	CG6443	CG5510	CG6443	CG5510	Chchd2	Chc
Plap	CG6479	CG5521	CG6479	CG5521	Chchd3	Chchd2
CG10011	CG6488	CG5522	CG6488	CG5522	Chd64	Chchd3
CG31224	CG6512	CG5532	CG6512	CG5532	cher	Chd64
CG4281	CG6550	CG5535	CG6550	CG5535	CHES-1-like	cher
Sema1b	CG6607	CG5554	CG6607	CG5554	Chi	CHES-1-like
C1GalTA	CG6621	CG5555	CG6621	CG5555	chic	Chi
aPKC	CG6638	CG5567	CG6638	CG5567	chico	chic
mus205	CG6659	CG5569	CG6659	CG5569	chif	chico
Nelf-A	CG6664	CG5589	CG6664	CG5589	chinmo	chif
PCNA	CG6693	CG5590	CG6693	CG5590	CHKov1	chinmo
Pdp1	CG6695	CG5608	CG6695	CG5608	CHKov2	CHKov1
fbl	CG6700	CG5611	CG6700	CG5611	chm	CHKov2
Abi	CG6701	CG5641	CG6701	CG5641	Chmp1	chm
MED15	CG6707	CG5664	CG6707	CG5664	CHMP2B	Chmp1
Ythdf	CG6712	CG5674	CG6712	CG5674	chn	CHMP2B
Cerk	CG6724	CG5676	CG6724	CG5676	chrb	chn
Cog1	CG6729	CG5694	CG6729	CG5694	Chro	chrb
CG6650	CG6762	CG5708	CG6762	CG5708	CIAPIN1	Chro
CycY	CG6766	CG5721	CG6766	CG5721	cib	CIAPIN1
Sac1	CG6767	CG5726	CG6767	CG5726	cic	cib
cert	CG6770	CG5728	CG6770	CG5728	cindr	cic
CG14200	CG6805	CG5734	CG6805	CG5734	Cip4	cindr
CG8728	CG6808	CG5742	CG6808	CG5742	ck	Cip4
TrpRS	CG6833	CG5745	CG6833	CG5745	Cka	ck
Rcd5	CG6843	CG5746	CG6843	CG5746	CkIalpha	Cka
CG3961	CG6845	CG5776	CG6845	CG5776	CkIIalpha	CkIalpha
CkIIbeta	CG6878	CG5787	CG6878	CG5787	CkIIalpha-i3	CkIIalpha
Baldspot	CG6891	CG5789	CG6891	CG5789	Cks30A	CkIIalpha-i3
Taf1	CG6903	CG5800	CG6903	CG5800	Clamp	Cks30A
simj	CG6907	CG5805	CG6907	CG5805	Claspin	Clamp
glo	CG6923	CG5808	CG6923	CG5808	ClC-b	Claspin
CHKov1	CG6928	CG5815	CG6928	CG5815	Clic	ClC-b
CG10979	CG6966	CG5823	CG6966	CG5823	CLIP-190	Clic
Rga	CG6967	CG5828	CG6967	CG5828	Cln7	CLIP-190
CG4853	CG6983	CG5830	CG6983	CG5830	CLS	Cln7
mahe	CG7006	CG5835	CG7006	CG5835	cmb	CLS
alpha-Est7	CG7011	CG5850	CG7011	CG5850	cnc	cmb
CG2064	CG7028	CG5853	CG7028	CG5853	cni	cnc
CG5854	CG7029	CG5854	CG7029	CG5854	cnk	cni
GCS2beta	CG7049	CG5861	CG7049	CG5861	cnn	cnk
MED1	CG7054	CG5862	CG7054	CG5862	cno	cnn
RhoGAPp190	CG7099	CG5877	CG7099	CG5877	Cnot4	cno
bip2	CG7110	CG5880	CG7110	CG5880	Cnx99A	Cnot4
key	CG7115	CG5903	CG7115	CG5903	Coa7	Cnx99A
Acf	CG7130	CG5913	CG7130	CG5913	Cog1	Coa7
Vps35	CG7133	CG5946	CG7133	CG5946	Coop	Cog1
eIF2D	CG7137	CG5953	CG7137	CG5953	Coq2	Coop
Ptip	CG7168	CG5958	CG7168	CG5958	Coq6	Coq2
CG5174	CG7182	CG5986	CG7182	CG5986	Coq7	Coq6
CG6511	CG7206	CG5989	CG7206	CG5989	cora	Coq7
CG14322	CG7218	CG6040	CG7218	CG6040	CoRest	cora
Nup93-1	CG7220	CG6051	CG7220	CG6051	coro	CoRest
Ctl1	CG7246	CG6071	CG7246	CG6071	COX4	coro
CrebB	CG7255	CG6073	CG7255	CG6073	COX5A	COX4
Ilp6	CG7265	CG6084	CG7265	CG6084	COX7C	COX5A
CG11486	CG7272	CG6115	CG7272	CG6115	COX8	COX7C
Pvf3	CG7275	CG6144	CG7275	CG6144	Cp1	COX8
P58IPK	CG7289	CG6145	CG7289	CG6145	cpa	Cp1
CG6454	CG7324	CG6163	CG7324	CG6163	cpb	cpa
kuk	CG7369	CG6171	CG7369	CG6171	Cpr	cpb
CG1513	CG7372	CG6175	CG7372	CG6175	Cpsf6	Cpr
CG5885	CG7379	CG6178	CG7379	CG6178	Cpsf73	Cpsf6
Sec8	CG7394	CG6204	CG7394	CG6204	CPT2	Cpsf73
jumu	CG7414	CG6218	CG7414	CG6218	crb	CPT2
Got2	CG7420	CG6230	CG7420	CG6230	CrebA	crb
Pcl	CG7430	CG6231	CG7430	CG6231	CrebB	CrebA
mre11	CG7457	CG6236	CG7457	CG6236	Crk	CrebB
Atg8a	CG7484	CG6254	CG7484	CG6254	crol	Crk
CG30349	CG7492	CG6276	CG7492	CG6276	crp	crol
CG8507	CG7506	CG6293	CG7506	CG6293	crq	crp
CG9330	CG7518	CG6310	CG7518	CG6310	Crtc	crq
Rpt2	CG7519	CG6325	CG7519	CG6325	Cse1	Crtc
Cnot4	CG7523	CG6330	CG7523	CG6330	Csk	Cse1
CG33303	CG7530	CG6340	CG7530	CG6340	Csl4	Csk
caz	CG7544	CG6420	CG7544	CG6420	CSN3	Csl4
fog	CG7546	CG6425	CG7546	CG6425	CSN6	CSN3
CG18088	CG7564	CG6428	CG7564	CG6428	CSN7	CSN6
Synj	CG7565	CG6443	CG7565	CG6443	CSN8	CSN7
Mitofilin	CG7600	CG6479	CG7600	CG6479	Csp	CSN8
RN-tre	CG7601	CG6488	CG7601	CG6488	csw	Csp
chif	CG7611	CG6512	CG7611	CG6512	CtBP	csw
rictor	CG7627	CG6607	CG7627	CG6607	CTCF	CtBP
Sf3b2	CG7637	CG6617	CG7637	CG6617	Ctl1	CTCF
mEFTu1	CG7639	CG6621	CG7639	CG6621	Ctl2	Ctl1
PI31	CG7650	CG6650	CG7650	CG6650	ctp	Ctl2
dome	CG7655	CG6659	CG7655	CG6659	Ctr1A	ctp
egl	CG7656	CG6664	CG7656	CG6664	ctrip	Ctr1A
ssh	CG7668	CG6665	CG7668	CG6665	cu	ctrip
MCPH1	CG7692	CG6693	CG7692	CG6693	cue	cu
Ctl2	CG7728	CG6700	CG7728	CG6700	Cul2	cue
Reps	CG7737	CG6701	CG7737	CG6701	Cul3	Cul2
CG2852	CG7739	CG6707	CG7739	CG6707	Cul4	Cul3
Clamp	CG7744	CG6712	CG7744	CG6712	Cul6	Cul4
Sec22	CG7745	CG6724	CG7745	CG6724	cutlet	Cul6
Sec61beta	CG7789	CG6729	CG7789	CG6729	cv-2	cutlet
pes	CG7800	CG6766	CG7800	CG6766	cv-c	cv-2
Fur1	CG7806	CG6767	CG7806	CG6767	cv-d	cv-c
AGBE	CG7824	CG6770	CG7824	CG6770	cwo	cv-d
CG7255	CG7840	CG6791	CG7840	CG6791	cyc	cwo
ken	CG7841	CG6805	CG7841	CG6805	CycA	cyc
DUBAI	CG7878	CG6833	CG7878	CG6833	CycB	CycA
Lrch	CG7889	CG6841	CG7889	CG6841	CycB3	CycB
aux	CG7900	CG6843	CG7900	CG6843	CycD	CycB3
cactin	CG7920	CG6845	CG7920	CG6845	CycE	CycD
CG17019	CG7945	CG6878	CG7945	CG6878	CycG	CycE
Cyt-c1	CG7956	CG6891	CG7956	CG6891	CycH	CycG
Drat	CG7970	CG6907	CG7970	CG6907	CycK	CycH
vir	CG7971	CG6928	CG7971	CG6928	CycT	CycK
Hip14	CG7987	CG6961	CG7987	CG6961	CycY	CycT
SrpRbeta	CG7988	CG6966	CG7988	CG6966	Cyp1	CycY
VhaSFD	CG8001	CG6967	CG8001	CG6967	Cyp310a1	Cyp1
Bap60	CG8031	CG6983	CG8031	CG6983	cyp33	Cyp310a1
PPP1R15	CG8032	CG6985	CG8032	CG6985	Cyp4e2	cyp33
CG4119	CG8034	CG7006	CG8034	CG7006	Cyp6a17	Cyp4e2
CG4829	CG8036	CG7011	CG8036	CG7011	Cyp6a20	Cyp6a17
Plp	CG8038	CG7028	CG8038	CG7028	Cyp6d4	Cyp6a20
SkpA	CG8046	CG7029	CG8046	CG7029	Cyp6v1	Cyp6d4
CG12773	CG8051	CG7049	CG8051	CG7049	Cyp9c1	Cyp6v1
POSH	CG8067	CG7054	CG8067	CG7054	Cyt-b5	Cyp9c1
CG10286	CG8078	CG7065	CG8078	CG7065	Cyt-c-p	Cyt-b5
CG32066	CG8108	CG7099	CG8108	CG7099	D1	Cyt-c-p
CG7182	CG8112	CG7110	CG8112	CG7110	D19A	D1
Cul2	CG8128	CG7115	CG8128	CG7115	D2hgdh	D19A
Nup107	CG8132	CG7130	CG8132	CG7130	da	D2hgdh
asRNA:CR45142	CG8142	CG7133	CG8142	CG7133	Dab	da
omd	CG8149	CG7137	CG8149	CG7137	Dak1	Dab
tws	CG8176	CG7139	CG8176	CG7139	dally	Dak1
CG13185	CG8177	CG7154	CG8177	CG7154	dap	dally
Gprk2	CG8184	CG7168	CG8184	CG7168	Dap160	dap
Slmap	CG8187	CG7182	CG8187	CG7182	daw	Dap160
CG43658	CG8188	CG7183	CG8188	CG7183	Daxx	daw
nito	CG8206	CG7206	CG8206	CG7206	dbo	Daxx
Sf3b1	CG8209	CG7218	CG8209	CG7218	Dbp73D	dbo
Strica	CG8223	CG7220	CG8223	CG7220	Dbp80	Dbp73D
Tsp42Ed	CG8243	CG7246	CG8243	CG7246	dbr	Dbp80
Syb	CG8272	CG7255	CG8272	CG7255	DCAF12	dbr
cass	CG8281	CG7272	CG8281	CG7272	Dci	DCAF12
CG10462	CG8289	CG7275	CG8289	CG7275	dco	Dci
Esyt2	CG8292	CG7289	CG8292	CG7289	Dcp-1	dco
Top3beta	CG8298	CG7324	CG8298	CG7324	DCP1	DCP1
Ubc2	CG8300	CG7332	CG8300	CG7332	DCP2	Dcp-1
CG9253	CG8306	CG7369	CG8306	CG7369	DCTN3-p24	DCP2
eIF2Bepsilon	CG8311	CG7372	CG8311	CG7372	DCTN4-p62	DCTN3-p24
ifc	CG8312	CG7379	CG8312	CG7379	DCTN5-p25	DCTN4-p62
CG13124	CG8314	CG7382	CG8314	CG7382	Debcl	DCTN5-p25
CG8635	CG8319	CG7394	CG8319	CG7394	Dek	Debcl
Pka-C1	CG8326	CG7414	CG8326	CG7414	del	Dek
Hmt4-20	CG8336	CG7420	CG8336	CG7420	Den1	del
N	CG8360	CG7430	CG8360	CG7430	Der-1	Den1
CG1902	CG8370	CG7457	CG8370	CG7457	Der-2	Der-1
AMPdeam	CG8397	CG7461	CG8397	CG7461	Dera	Der-2
Gnf1	CG8405	CG7483	CG8405	CG7483	Desat1	Dera
CG30020	CG8414	CG7484	CG8414	CG7484	Df31	Desat1
Rcd1	CG8441	CG7488	CG8441	CG7488	Dg	Df31
ari-1	CG8468	CG7492	CG8468	CG7492	Dgkepsilon	Dg
be	CG8490	CG7506	CG8490	CG7506	Dgp-1	Dgkepsilon
CG8939	CG8500	CG7518	CG8500	CG7518	dgt1	Dgp-1
Pdhb	CG8516	CG7523	CG8516	CG7523	Dhap-at	dgt1
Pkc98E	CG8520	CG7530	CG8520	CG7530	Dhc64C	Dhap-at
PpD3	CG8531	CG7544	CG8531	CG7544	DhpD	Dhc64C
mRNA-cap	CG8547	CG7546	CG8547	CG7546	Dhpr	DhpD
BI-1	CG8569	CG7564	CG8569	CG7564	Dhx15	Dhpr
CG9641	CG8602	CG7565	CG8602	CG7565	Diap1	Dhx15
aralar1	CG8611	CG7600	CG8611	CG7600	Diap2	Diap1
cmet	CG8613	CG7601	CG8613	CG7601	didum	Diap2
prtp	CG8617	CG7611	CG8617	CG7611	Dif	didum
CG8468	CG8620	CG7627	CG8620	CG7627	dikar	Dif
Pi3K21B	CG8635	CG7630	CG8635	CG7630	Dip-B	dikar
Pp2C1	CG8668	CG7637	CG8668	CG7637	Dip-C	DIP1
HBS1	CG8671	CG7639	CG8671	CG7639	DIP1	Dip-B
Rpn13	CG8675	CG7650	CG8675	CG7650	dj-1beta	Dip-C
UQCR-C2	CG8677	CG7655	CG8677	CG7655	dl	dj-1beta
CG2747	CG8728	CG7656	CG8728	CG7656	Dlc90F	dl
CG9416	CG8765	CG7668	CG8765	CG7668	dlg1	Dlc90F
Nulp1	CG8768	CG7692	CG8768	CG7692	Dlic	dlg1
CalpA	CG8786	CG7706	CG8786	CG7706	dmt	Dlic
JIL-1	CG8833	CG7718	CG8833	CG7718	Dmtn	dmt
sli	CG8839	CG7730	CG8839	CG7730	DnaJ-1	Dmtn
CG5521	CG8841	CG7737	CG8841	CG7737	DNAlig3	DnaJ-1
Liprin-alpha	CG8858	CG7739	CG8858	CG7739	DNApol-alpha180	DNAlig3
Rbf	CG8870	CG7741	CG8870	CG7741	DNApol-epsilon255	DNApol-alpha180
pds5	CG8878	CG7744	CG8878	CG7744	DNApol-iota	DNApol-epsilon255
plum	CG8891	CG7745	CG8891	CG7745	dnt	DNApol-iota
GstD9	CG8924	CG7789	CG8924	CG7789	Doa	dnt
Ote	CG8929	CG7791	CG8929	CG7791	dock	Doa
robo2	CG8939	CG7800	CG8939	CG7800	dod	dock
CG14650	CG8950	CG7806	CG8950	CG7806	dop	dod
CG3744	CG8963	CG7824	CG8963	CG7824	DOR	dop
Cdc37	CG8974	CG7840	CG8974	CG7840	dos	DOR
Cul5	CG8993	CG7857	CG8993	CG7857	Dp	dos
Mical	CG9003	CG7872	CG9003	CG7872	Dp1	Dp
CG18596	CG9005	CG7878	CG9005	CG7878	Dpck	Dp1
lds	CG9018	CG7879	CG9018	CG7879	Dph1	Dpck
CG7728	CG9044	CG7903	CG9044	CG7903	Dpy-30L1	Dph1
Fatp1	CG9065	CG7920	CG9065	CG7920	Drak	Dpy-30L1
Git	CG9132	CG7943	CG9132	CG7943	Drat	Drak
mnb	CG9135	CG7945	CG9135	CG7945	dre4	Drat
Dcr-1	CG9143	CG7946	CG9143	CG7946	Dref	dre4
MFS14	CG9147	CG7956	CG9147	CG7956	Drice	Dref
ATPsynD	CG9171	CG7970	CG9171	CG7970	Droj2	Drice
AnxB11	CG9175	CG7971	CG9175	CG7971	drongo	Droj2
CG12121	CG9205	CG7985	CG9205	CG7985	Drp1	drongo
mab-21	CG9213	CG7987	CG9213	CG7987	Dscam1	Drp1
Mink	CG9220	CG8001	CG9220	CG8001	Dsp1	Dscam1
Sfmbt	CG9231	CG8005	CG9231	CG8005	dtn	Dsp1
Smurf	CG9253	CG8010	CG9253	CG8010	Duba	dtn
dco	CG9270	CG8027	CG9270	CG8027	DUBAI	Duba
Vang	CG9281	CG8031	CG9281	CG8031	dwg	DUBAI
bowl	CG9300	CG8032	CG9300	CG8032	Dyb	dwg
Srp72	CG9304	CG8036	CG9304	CG8036	Dyrk2	Dyb
HDAC1	CG9328	CG8038	CG9328	CG8038	Dys	Dyrk2
Mcm6	CG9331	CG8042	CG9331	CG8042	dysc	Dys
Tailor	CG9346	CG8046	CG9346	CG8046	E(bx)	dysc
Vav	CG9360	CG8067	CG9360	CG8067	E(Pc)	E(bx)
fray	CG9372	CG8079	CG9372	CG8079	e(y)3	E(Pc)
mud	CG9391	CG8108	CG9391	CG8108	E2f1	e(y)3
Rpt5	CG9399	CG8112	CG9399	CG8112	Eaf	E2f1
SRm160	CG9426	CG8128	CG9426	CG8128	eas	Eaf
Nrx-IV	CG9436	CG8149	CG9436	CG8149	east	eas
hppy	CG9471	CG8159	CG9471	CG8159	Eb1	east
CG3061	CG9485	CG8176	CG9485	CG8176	ebd1	Eb1
CG7600	CG9547	CG8177	CG9547	CG8177	ebd2	ebd1
da	CG9588	CG8184	CG9588	CG8184	ec	ebd2
lilli	CG9596	CG8187	CG9596	CG8187	eco	ec
parvin	CG9609	CG8188	CG9609	CG8188	EcR	eco
stck	CG9630	CG8191	CG9630	CG8191	Ect3	EcR
wech	CG9646	CG8195	CG9646	CG8195	Ect4	Ect3
Rpn5	CG9662	CG8199	CG9662	CG8199	Edc3	Ect4
Strip	CG9663	CG8207	CG9663	CG8207	edl	Edc3
Zip99C	CG9674	CG8209	CG9674	CG8209	EDTP	edl
ArgRS	CG9684	CG8223	CG9684	CG8223	eEF1alpha1	EDTP
CG9467	CG9705	CG8230	CG9705	CG8230	eEF1beta	eEF1alpha1
IntS1	CG9706	CG8237	CG9706	CG8237	eEF1delta	eEF1beta
Asx	CG9723	CG8243	CG9723	CG8243	eEF1gamma	eEF1delta
CG9485	CG9727	CG8272	CG9727	CG8272	eEF2	eEF1gamma
Uev1A	CG9743	CG8281	CG9743	CG8281	eEF5	eEF2
CG5214	CG9775	CG8292	CG9775	CG8292	Efa6	eEF5
Ocrl	CG9776	CG8298	CG9776	CG8298	eff	Efa6
SMC2	CG9784	CG8306	CG9784	CG8306	Efr	eff
CG8671	CG9795	CG8311	CG9795	CG8311	egh	Efr
RhoGAP19D	CG9799	CG8312	CG9799	CG8312	egl	egh
ND-51	CG9855	CG8314	CG9855	CG8314	egr	egl
wapl	CG9886	CG8319	CG9886	CG8319	Ehbp1	egr
S	CG9902	CG8321	CG9902	CG8321	eIF2alpha	Ehbp1
polybromo	CG9915	CG8323	CG9915	CG8323	eIF2Bdelta	eIF2alpha
Nct	CG9922	CG8326	CG9922	CG8326	eIF2beta	eIF2Bdelta
Art1	CG9932	CG8336	CG9932	CG8336	eIF3c	eIF2beta
CAP	CG9934	CG8360	CG9934	CG8360	eIF3h	eIF3c
baf	CG9945	CG8366	CG9945	CG8366	eIF3i	eIF3h
Pgd	CG9951	CG8379	CG9951	CG8379	eIF3j	eIF3i
Cdc5	CG9986	CG8388	CG9986	CG8388	eIF4A	eIF3j
ND-49	CG9992	CG8397	CG9992	CG8397	eIF4E1	eIF4A
TfIIFalpha	chb	CG8405	chb	CG8405	eIF4EHP	eIF4E1
mnd	Chc	CG8412	Chc	CG8412	eIF4G1	eIF4EHP
Rab6	Chchd2	CG8414	Chchd2	CG8414	eIF4H1	eIF4G1
Vps52	Chchd3	CG8435	Chchd3	CG8435	eIF5B	eIF4H1
lin	Chd1	CG8441	Chd1	CG8441	Eip55E	eIF5B
CG9220	Chd64	CG8460	Chd64	CG8460	Eip63E	Eip55E
Hrs	cher	CG8468	cher	CG8468	Eip74EF	Eip63E
nclb	CHES-1-like	CG8478	CHES-1-like	CG8478	Eip75B	Eip74EF
Gadd45	Chi	CG8485	Chi	CG8485	EloA	Eip75B
Saf-B	chic	CG8490	chic	CG8490	EloB	EloA
prage	chico	CG8500	chico	CG8500	EloC	EloB
CASK	chif	CG8516	chif	CG8516	Elp2	EloC
Dlc90F	chinmo	CG8520	chinmo	CG8520	ema	Elp2
AMPKalpha	CHKov1	CG8531	CHKov1	CG8531	emb	ema
Dpit47	CHKov2	CG8547	CHKov2	CG8547	emc	emb
P32	chm	CG8549	chm	CG8549	EMC1	emc
Prosalpha6	Chmp1	CG8569	Chmp1	CG8569	EMC8-9	EMC1
Ube3a	CHMP2B	CG8602	CHMP2B	CG8602	ena	EMC8-9
svr	chn	CG8611	chn	CG8611	enc	ena
Bub3	chrb	CG8613	chrb	CG8613	EndoA	enc
Caper	Chro	CG8617	Chro	CG8617	EndoB	EndoA
VhaAC39-1	CIAPIN1	CG8635	CIAPIN1	CG8635	EndoGI	EndoB
CG11050	cib	CG8668	cib	CG8668	Eno	EndoGI
CG13366	cic	CG8671	cic	CG8671	enok	Eno
Caf1-180	cin	CG8675	cin	CG8675	ens	enok
Prosbeta5	cindr	CG8677	cindr	CG8677	Ent1	ens
eIF3j	Cip4	CG8726	Cip4	CG8726	Eogt	Ent1
Cap-D2	Cirl	CG8728	Cirl	CG8728	Epg5	Eogt
Eaf	ck	CG8765	ck	CG8765	Eph	Epg5
Nrg	Cka	CG8768	Cka	CG8768	eRF1	Eph
Ras85D	CkIalpha	CG8778	CkIalpha	CG8778	eRF3	eRF1
babo	CkIIalpha	CG8786	CkIIalpha	CG8786	ergic53	eRF3
mRpS22	CkIIalpha-i3	CG8833	CkIIalpha-i3	CG8833	ERp60	ergic53
CG9799	Cks30A	CG8839	Cks30A	CG8839	Es2	ERp60
Tsc1	cl	CG8841	cl	CG8841	esc	Es2
Chi	Clamp	CG8858	Clamp	CG8858	Etf-QO	esc
br	Claspin	CG8878	Claspin	CG8878	ETHR	Etf-QO
CG34133	Clc	CG8891	Clc	CG8891	Etl1	ETHR
Lsm12	ClC-b	CG8929	ClC-b	CG8929	Ets21C	Etl1
enok	Clic	CG8939	Clic	CG8939	Ets97D	Ets21C
uex	CLIP-190	CG8963	CLIP-190	CG8963	Evi5	Ets97D
ClC-c	Cln7	CG8974	Cln7	CG8974	ex	Evi5
Patr-1	CLS	CG9005	CLS	CG9005	Exn	ex
par-6	clu	CG9044	clu	CG9044	Exo70	Exn
asp	cmb	CG9062	cmb	CG9062	exu	Exo70
CG10444	cmet	CG9065	cmet	CG9065	fabp	exu
CdGAPr	CNBP	CG9114	CNBP	CG9114	Faf2	fabp
CG11791	cnc	CG9132	cnc	CG9132	Fak	Faf2
CG42663	cni	CG9135	cni	CG9135	Fancd2	Fak
Psn	cnk	CG9143	cnk	CG9143	FANCI	Fancd2
grsm	cnn	CG9147	cnn	CG9147	Fancm	FANCI
AspRS-m	cno	CG9149	cno	CG9149	FASN1	Fancm
Idh3a	Cnot4	CG9154	Cnot4	CG9154	fax	FASN1
CG9934	Cnx99A	CG9171	Cnx99A	CG9171	fbl	fax
His4r	Coa7	CG9175	Coa7	CG9175	Fbl6	fbl
RanBP3	Cog1	CG9205	Cog1	CG9205	FBXO11	Fbl6
CG11771	Cog3	CG9213	Cog3	CG9213	Fdh	FBXO11
CG5734	coil	CG9220	coil	CG9220	fdl	Fdh
Dis3	cold	CG9231	cold	CG9231	Fdx1	fdl
Charon	conu	CG9246	conu	CG9246	FeCH	Fdx1
jim	Coop	CG9248	Coop	CG9248	Fem-1	FeCH
muc	Coprox	CG9253	Coprox	CG9253	FER	Fem-1
CG10055	Coq2	CG9300	Coq2	CG9300	Fer1HCH	FER
CG5728	Coq6	CG9302	Coq6	CG9302	Fer2LCH	Fer1HCH
asRNA:CR44976	Coq7	CG9304	Coq7	CG9304	Fgop2	Fer2LCH
CG10962	cora	CG9328	cora	CG9328	Fhos	Fgop2
CG9911	CoRest	CG9331	CoRest	CG9331	Fic	Fhos
wcy	corn	CG9346	corn	CG9346	FIG4	Fic
CG10365	coro	CG9360	coro	CG9360	Fim	FIG4
CG1572	Cortactin	CG9372	Cortactin	CG9372	Fis1	Fim
Syx5	COX4	CG9391	COX4	CG9391	Fkbp12	Fis1
ebo	COX5A	CG9393	COX5A	CG9393	Fkbp14	Fkbp12
lwr	COX7C	CG9399	COX7C	CG9399	Fkbp39	Fkbp14
CG31998	COX8	CG9410	COX8	CG9410	Fkbp59	Fkbp39
asRNA:CR45396	Cp1	CG9425	Cp1	CG9425	fl(2)d	Fkbp59
tun	Cp190	CG9426	Cp190	CG9426	flfl	fl(2)d
ATP6AP2	cpa	CG9436	cpa	CG9436	fliI	flfl
Catsup	cpb	CG9485	cpb	CG9485	flw	fliI
Mcm7	Cpes	CG9536	Cpes	CG9536	Fmo-2	flw
CG5151	Cpr	CG9547	Cpr	CG9547	Fmr1	Fmo-2
HIPP1	Cpsf6	CG9578	Cpsf6	CG9578	fmt	Fmr1
CG10631	Cpsf73	CG9588	Cpsf73	CG9588	Fnta	fmt
Tor	CPT2	CG9601	CPT2	CG9601	fok	Fnta
CG7834	Crag	CG9609	Crag	CG9609	for	fok
Spt-I	crb	CG9630	crb	CG9630	FoxK	for
CG6115	crc	CG9646	crc	CG9646	foxo	FoxK
SP1173	CrebA	CG9662	CrebA	CG9662	fra	foxo
anne	CrebB	CG9663	CrebB	CG9663	FRG1	fra
Hem	Crk	CG9674	Crk	CG9674	frj	FRG1
TfIIEalpha	crm	CG9706	crm	CG9706	frtz	frj
CG12007	crol	CG9723	crol	CG9723	fru	frtz
l(1)G0020	crp	CG9743	crp	CG9743	fry	fru
Fum1	crq	CG9775	crq	CG9775	fs(1)h	fry
Kah	Crtc	CG9776	Crtc	CG9776	Fs(2)Ket	fs(1)h
CG11334	Cse1	CG9784	Cse1	CG9784	fs(2)ltoPP43	Fs(2)Ket
CG5850	Csk	CG9795	Csk	CG9795	ftz-f1	fs(2)ltoPP43
gfzf	Csl4	CG9799	Csl4	CG9799	FucT6	ftz-f1
Asap	CSN3	CG9849	CSN3	CG9849	Fur1	FucT6
CG1317	CSN6	CG9855	CSN6	CG9855	Fur2	Fur1
CG32767	CSN7	CG9886	CSN7	CG9886	fwd	Fur2
Clc	CSN8	CG9902	CSN8	CG9902	fwe	fwd
dia	Csp	CG9915	Csp	CG9915	fz4	fwe
wrd	csw	CG9922	csw	CG9922	fzr	fz4
CG32368	ct	CG9932	ct	CG9932	fzy	fzr
CG9302	cta	CG9934	cta	CG9934	g	fzy
godzilla	CtBP	CG9941	CtBP	CG9941	Gadd45	g
ssx	CTCF	CG9945	CTCF	CG9945	Gale	Gadd45
CG2991	Ctl1	CG9951	Ctl1	CG9951	galectin	Gale
Nup160	Ctl2	CG9986	Ctl2	CG9986	Galk	galectin
Thiolase	ctp	chb	ctp	chb	Galphai	Galk
CG31550	CTPsyn	Chc	CTPsyn	Chc	Galphao	Galphai
CG33298	Ctr1A	Chchd2	Ctr1A	Chchd2	Galphas	Galphao
Rs1	ctrip	Chchd3	ctrip	Chchd3	gammaCOP	Galphas
Tgi	CtsB1	Chd64	CtsB1	Chd64	gammaSnap1	gammaCOP
CG9171	cu	cher	cu	cher	Gapdh1	gammaSnap1
Naa35	cue	CHES-1-like	cue	CHES-1-like	Gapdh2	Gapdh1
Set	Cul1	Chi	Cul1	Chi	Gapvd1	Gapdh2
VhaPPA1-1	Cul2	chic	Cul2	chic	Gart	Gapvd1
Ziz	Cul3	chico	Cul3	chico	gas	Gart
vlc	Cul4	chif	Cul4	chif	GATAd	gas
Rassf	Cul6	chinmo	Cul6	chinmo	GatB	GATAd
Prp19	cutlet	CHKov1	cutlet	CHKov1	gbb	GatB
RapGAP1	cv	CHKov2	cv	CHKov2	Gbp1	gbb
asRNA:CR46135	cv-2	ChLD3	cv-2	ChLD3	Gbs-70E	Gbp1
gish	cv-c	chm	cv-c	chm	Gbs-76A	Gbs-70E
mino	cv-d	Chmp1	cv-d	Chmp1	gce	Gbs-76A
BOD1	cwo	CHMP2B	cwo	CHMP2B	Gclc	gce
CG8177	cyc	chn	cyc	chn	Gclm	Gclc
didum	CycA	CHOp24	CycA	CHOp24	Gdap2	Gclm
yellow-f	CycB	CHORD	CycB	CHORD	Gdh	Gdap2
CG6707	CycB3	chrb	CycB3	chrb	Gdi	Gdh
Marf	CycD	Chro	CycD	Chro	GEFmeso	Gdi
wdn	CycE	CIAPIN1	CycE	CIAPIN1	Gel	GEFmeso
Mfe2	CycG	cib	CycG	cib	Gem2	Gel
Irp-1A	CycH	cic	CycH	cic	Gfat2	Gem2
Atg4a	CycK	cindr	CycK	cindr	Gga	Gfat2
CG5746	CycT	Cip4	CycT	Cip4	Ggamma1	Gga
Miro	CycY	ck	CycY	ck	gig	Ggamma1
Spt5	Cyp1	Cka	Cyp1	Cka	GILT1	gig
pit	Cyp310a1	CkIalpha	Cyp310a1	CkIalpha	Gip	GILT1
CG3651	cyp33	CkIIalpha	cyp33	CkIIalpha	gish	Gip
asRNA:CR43944	Cyp4e2	CkIIalpha-i3	Cyp4e2	CkIIalpha-i3	Gk2	gish
CG3308	Cyp6a17	CkIIbeta	Cyp6a17	CkIIbeta	GlcAT-I	Gk2
Ubc6	Cyp6a20	Cks30A	Cyp6a20	Cks30A	GlcT	GlcAT-I
CG31324	Cyp6a23	Cks85A	Cyp6a23	Cks85A	glec	GlcT
Ptpmeg2	Cyp6d4	Clamp	Cyp6d4	Clamp	Glg1	glec
CG1824	Cyp6v1	Claspin	Cyp6v1	Claspin	Gli	Glg1
me31B	Cyp9c1	Clbn	Cyp9c1	Clbn	GlnRS	Gli
dpa	cype	ClC-b	cype	ClC-b	glob1	GlnRS
sip3	Cys	Clic	Cys	Clic	GLS	glob1
CG1578	Cyt-b5	CLIP-190	Cyt-b5	CLIP-190	glu	GLS
CG33969	Cyt-c-p	Cln7	Cyt-c-p	Cln7	Glut4EF	glu
Su(var)205	D1	Clp	D1	Clp	GlyP	Glut4EF
nolo	D19A	CLS	D19A	CLS	GlyS	GlyP
CG13784	D2hgdh	cmb	D2hgdh	cmb	Gmap	GlyS
CG9246	d4	Cnb	d4	Cnb	Gmer	Gmap
TM9SF3	da	cnc	da	cnc	GMF	Gmer
Wdr24	Dab	cni	Dab	cni	GNBP1	GMF
beta-PheRS	Dak1	cN-IIIB	Dak1	cN-IIIB	Gnf1	GNBP1
CG8878	dally	cnk	dally	cnk	Gnpnat	Gnf1
CG14411	dap	cnn	dap	cnn	godzilla	Gnpnat
CG4511	Dap160	cno	Dap160	cno	gol	godzilla
Ppa	dare	Cnot4	dare	Cnot4	Golgin245	gol
Synd	Dark	Cnx99A	Dark	Cnx99A	Gorab	Golgin245
lama	daw	Coa7	daw	Coa7	Got1	Gorab
CG14683	Daxx	Cog1	Daxx	Cog1	Got2	Got1
CG5390	dbe	Col4a1	dbe	Col4a1	Gp150	Got2
CG5805	dbo	Cont	dbo	Cont	Gp93	Gp150
msl-2	Dbp73D	Coop	Dbp73D	Coop	Gpat4	Gp93
Dref	Dbp80	Coq2	Dbp80	Coq2	Gpdh1	Gpat4
Lnpk	dbr	Coq5	dbr	Coq5	Gpo1	Gpdh1
C3G	DCAF12	Coq6	DCAF12	Coq6	gpp	Gpo1
CG16711	Dci	Coq7	Dci	Coq7	Graf	gpp
SoxN	dco	cora	dco	cora	GramD1B	Graf
CG17765	DCP1	CoRest	DCP1	CoRest	gro	GramD1B
CG9727	Dcp-1	coro	Dcp-1	coro	grp	gro
CG6664	DCP2	COX4	DCP2	COX4	Gs1	grp
slmb	Dcr-2	COX5A	Dcr-2	COX5A	gsb	Gs1
tam	DCTN2-p50	COX5B	DCTN2-p50	COX5B	GstD1	gsb
CG33523	DCTN3-p24	COX7C	DCTN3-p24	COX7C	GstD3	GstD1
CG7453	DCTN4-p62	COX8	DCTN4-p62	COX8	GstD9	GstD3
Wbp2	DCTN5-p25	Cp1	DCTN5-p25	Cp1	GstE11	GstD9
X11L	Debcl	cpa	Debcl	cpa	GstE12	GstE11
asRNA:CR44049	Dek	cpb	Dek	cpb	GstE13	GstE12
su(w[a])	del	Cpr	del	Cpr	GstE3	GstE13
RanGAP	Den1	Cpsf6	Den1	Cpsf6	GstE6	GstE3
rad50	Der-1	Cpsf73	Der-1	Cpsf73	GstE8	GstE6
slpr	Der-2	CPT2	Der-2	CPT2	GstT1	GstE8
CG1440	Dera	Cralbp	Dera	Cralbp	GstT2	GstT1
hob	Desat1	CRAT	Desat1	CRAT	Gug	GstT2
Asator	Df31	crb	Df31	crb	gukh	Gug
CG10602	Dg	CrebA	Dg	CrebA	gus	gukh
CG14073	Dgkepsilon	CrebB	Dgkepsilon	CrebB	gw	gus
CG3662	Dgp-1	CRIF	Dgp-1	CRIF	GXIVsPLA2	gw
CanA-14F	dgt1	Crk	dgt1	Crk	Gyf	GXIVsPLA2
mof	dgt3	CRMP	dgt3	CRMP	Gyg	Gyf
Trap1	dgt5	crok	dgt5	crok	h	Gyg
CG34449	Dhap-at	crol	Dhap-at	crol	Hacd1	h
CG6230	Dhc64C	crp	Dhc64C	crp	Hacd2	Hacd1
Sara	DhpD	crq	DhpD	crq	Hakai	Hacd2
trr	Dhpr	Crtc	Dhpr	Crtc	hang	Hakai
Dronc	Dhx15	Cse1	Dhx15	Cse1	Hat1	hang
AIF	dia	Csk	dia	Csk	Hcf	Hat1
CG14712	Diap1	Csl4	Diap1	Csl4	hdc	Hcf
Nfs1	Diap2	CSN3	Diap2	CSN3	hdly	hdc
dsd	Dic1	CSN6	Dic1	CSN6	HEATR2	hdly
CG10103	didum	CSN7	didum	CSN7	Hel25E	HEATR2
Grasp65	Dif	CSN8	Dif	CSN8	Hel89B	Hel25E
REG	dikar	Csp	dikar	Csp	HemK1	Hel89B
Pfdn2	DIP1	csul	DIP1	csul	hep	HemK1
schlank	Dip-B	csw	Dip-B	csw	heph	hep
Bre1	Dip-C	CtBP	Dip-C	CtBP	her	heph
Gpat4	dj-1beta	CTCF	dj-1beta	CTCF	HERC2	her
GstE8	dl	CtIP	dl	CtIP	Herp	HERC2
MTF-1	Dlc90F	Ctl1	Dlc90F	Ctl1	Hers	Herp
128up	dlg1	Ctl2	dlg1	Ctl2	Hex-A	Hers
CG4896	Dlic	ctp	Dlic	ctp	Hexo2	Hex-A
Socs16D	dlp	Ctr1A	dlp	Ctr1A	Hip1	Hexo2
qkr58E-2	dmt	ctrip	dmt	ctrip	Hipk	Hip1
Impbeta11	Dmtn	cu	Dmtn	cu	Hira	Hipk
ste24a	DnaJ-1	cue	DnaJ-1	cue	His2Av	Hira
RpL34a	DnaJ-H	Cul2	DnaJ-H	Cul2	His3.3B	His2Av
Atu	DNAlig3	Cul3	DNAlig3	Cul3	His4r	His3.3B
Cpsf5	DNAlig4	Cul4	DNAlig4	Cul4	HisRS	His4r
Rim2	DNApol-alpha180	Cul6	DNApol-alpha180	Cul6	Hmg-2	HisRS
kel	DNApol-epsilon255	cutlet	DNApol-epsilon255	cutlet	Hmgcr	Hmg-2
Rbm13	DNApol-iota	cv-2	DNApol-iota	cv-2	HmgD	Hmgcr
Rpn11	dnc	cv-c	dnc	cv-c	Hmgs	HmgD
SMC1	dnt	cv-d	dnt	cv-d	HmgZ	Hmgs
asRNA:CR44704	Doa	cwo	Doa	cwo	Hmt-1	HmgZ
CG3198	dock	cyc	dock	cyc	Hmt4-20	Hmt-1
CG7044	dod	CycA	dod	CycA	Hmu	Hmt4-20
CG10638	Dok	CycB	Dok	CycB	Hnf4	Hmu
CG2199	dome	CycB3	dome	CycB3	HnRNP-K	Hnf4
Su(var)3-7	dop	CycC	dop	CycC	how	HnRNP-K
fmt	dor	CycD	dor	CycD	Hph	how
rno	dos	CycE	dos	CycE	hpo	Hph
CG3542	Dp	CycG	Dp	CycG	hppy	hpo
Eato	Dp1	CycH	Dp1	CycH	hpRNA:CR33940	hppy
Pgant7	Dpck	CycK	Dpck	CycK	HPS4	hpRNA:CR33940
yem	Dph1	CycT	Dph1	CycT	Hr78	HPS4
CG10802	Dpy-30L1	CycY	Dpy-30L1	CycY	Hrb27C	Hr78
HnRNP-K	Drak	CYLD	Drak	CYLD	Hrb87F	Hrb27C
roq	Drat	Cyp1	Drat	Cyp1	Hrb98DE	Hrb87F
CG11070	dre4	Cyp310a1	dre4	Cyp310a1	hrg	Hrb98DE
CG32425	Dref	cyp33	Dref	cyp33	Hrs	hrg
asRNA:CR46089	Drice	Cyp4d2	Drice	Cyp4d2	Hs2st	Hrs
eIF6	drk	Cyp4e2	drk	Cyp4e2	Hs6st	Hs2st
tth	Droj2	Cyp6a17	Droj2	Cyp6a17	Hsc70-3	Hs6st
CG11857	Dronc	Cyp6a20	Dronc	Cyp6a20	Hsc70-4	Hsc70-3
CkIIalpha	drongo	Cyp6d4	drongo	Cyp6d4	Hsc70Cb	Hsc70-4
RhoGEF3	Drp1	Cyp6v1	Drp1	Cyp6v1	Hsf	Hsc70Cb
drpr	drpr	Cyp9c1	drpr	Cyp9c1	Hsp23	Hsf
COX6B	Dscam1	Cyp9f3	Dscam1	Cyp9f3	Hsp26	Hsp23
Coq6	dsd	CysRS	dsd	CysRS	Hsp60A	Hsp26
ana1	Dsp1	Cyt-b5	Dsp1	Cyt-b5	Hsp68	Hsp60A
CG6227	dtn	Cyt-c1	dtn	Cyt-c1	htk	Hsp68
FoxK	Duba	Cyt-c-p	Duba	Cyt-c-p	htl	htk
Mcm2	DUBAI	D1	DUBAI	D1	hts	htl
Nnp-1	dup	D19A	dup	D19A	Hus1-like	hts
AsnS	dwg	D2hgdh	dwg	D2hgdh	hwt	Hus1-like
GAA1	dx	da	dx	da	Hyccin	hwt
ND-42	Dyb	Dab	Dyb	Dab	hyd	Hyccin
Psc	Dyrk2	Dak1	Dyrk2	Dak1	Hydr2	hyd
Tpc1	Dys	dally	Dys	dally	hyx	Hydr2
CG13895	dysc	dap	dysc	dap	I-2	hyx
CG30022	E(bx)	Dap160	E(bx)	Dap160	Ice1	I-2
LRP1	E(Pc)	daw	E(Pc)	daw	Ice2	Ice1
Nup50	E(var)3-9	Daxx	E(var)3-9	Daxx	ics	Ice2
TSG101	e(y)3	dbo	e(y)3	dbo	Ide	ics
TTLL12	E2f1	Dbp73D	E2f1	Dbp73D	Idgf1	Ide
Faf2	Eaf	Dbp80	Eaf	Dbp80	Idgf2	Idgf1
Ipk2	eas	dbr	eas	dbr	Idgf3	Idgf2
Mms19	east	DCAF12	east	DCAF12	Idgf6	Idgf3
tay	Eb1	Dci	Eb1	Dci	Idh	Idgf6
CG42748	ebd1	dco	ebd1	dco	Ids	Idh
Cyp6a17	ebd2	DCP1	ebd2	DCP1	ifc	Ids
CG6767	ec	Dcp-1	ec	Dcp-1	ihog	ifc
Prosalpha4	eco	DCP2	eco	DCP2	IleRS-m	ihog
Sp7	EcR	DCTN3-p24	EcR	DCTN3-p24	imd	IleRS-m
CG15347	Ect3	DCTN4-p62	Ect3	DCTN4-p62	Imp	imd
Prp31	Ect4	DCTN5-p25	Ect4	DCTN5-p25	ImpL2	Imp
Sxl	Edc3	Deaf1	Edc3	Deaf1	inaE	ImpL2
twi	edl	Debcl	edl	Debcl	inc	inaE
wfs1	EDTP	defl	EDTP	defl	Indy	inc
CG8858	eEF1alpha1	Dek	eEF1alpha1	Dek	Ing3	Indy
Sk2	eEF1beta	del	eEF1beta	del	Inos	Ing3
l(3)psg2	eEF1delta	Den1	eEF1delta	Den1	InR	Inos
Best1	eEF1gamma	Der-1	eEF1gamma	Der-1	insc	InR
Kat60	eEF2	Der-2	eEF2	Der-2	IntS11	insc
vimar	eEF5	Dera	eEF5	Dera	IntS3	IntS11
CG8370	Efa6	Desat1	Efa6	Desat1	IntS4	IntS3
CG8516	eff	Det	eff	Det	IntS6	IntS4
Paics	Efr	Df31	Efr	Df31	IntS8	IntS6
Rac2	egg	Dg	egg	Dg	Invadolysin	IntS8
mRpS30	egh	Dgkepsilon	egh	Dgkepsilon	Inx2	Invadolysin
Apc2	egl	Dgp-1	egl	Dgp-1	Ip259	Inx2
Irbp	egr	dgt1	egr	dgt1	IP3K1	Ip259
Ranbp9	Ehbp1	Dhap-at	Ehbp1	Dhap-at	IP3K2	IP3K1
Mkk4	eIF1	Dhc64C	eIF1	Dhc64C	Ipp	IP3K2
Tango14	eIF1A	DhpD	eIF1A	DhpD	Irbp	Ipp
CG5028	eIF2alpha	Dhpr	eIF2alpha	Dhpr	Irc	Irbp
CG16989	eIF2Bdelta	Dhx15	eIF2Bdelta	Dhx15	Iru	Irc
CG9135	eIF2beta	Diap1	eIF2beta	Diap1	isopeptidase-T-3	Iru
Fdh	eIF2Bgamma	Diap2	eIF2Bgamma	Diap2	isoQC	isopeptidase-T-3
Rpt6	eIF3b	didum	eIF3b	didum	ItgaPS4	isoQC
Ttd14	eIF3c	Dif	eIF3c	Dif	ITP	ItgaPS4
CG17514	eIF3h	dikar	eIF3h	dikar	Itp-r83A	ITP
CG3226	eIF3i	Dim1	eIF3i	Dim1	Jafrac1	Itp-r83A
Cul4	eIF3j	DIP1	eIF3j	DIP1	Jafrac2	Jafrac1
SF2	eIF4A	DIP2	eIF4A	DIP2	jagn	Jafrac2
mgl	eIF4E1	Dip-B	eIF4E1	Dip-B	jar	jagn
AdipoR	eIF4EHP	Dip-C	eIF4EHP	Dip-C	Jheh2	jar
CG5903	eIF4G1	dj-1beta	eIF4G1	dj-1beta	JhI-26	Jheh2
Su(z)12	eIF4H1	dl	eIF4H1	dl	jigr1	JhI-26
alphaSnap	eIF5B	Dlc90F	eIF5B	Dlc90F	JIL-1	jigr1
ebd2	Eip55E	dlg1	Eip55E	dlg1	jim	JIL-1
mute	Eip63E	Dlic	Eip63E	Dlic	jing	jim
CG10082	Eip71CD	dmpd	Eip71CD	dmpd	JMJD4	jing
Trp1	Eip74EF	dmt	Eip74EF	dmt	jp	JMJD4
cue	Eip75B	Dmtn	Eip75B	Dmtn	Jra	jp
msl-1	Eip93F	DnaJ-1	Eip93F	DnaJ-1	jumu	Jra
Gdh	elav	DNAlig3	elav	DNAlig3	Jupiter	jumu
Kr-h2	elgi	DNApol-alpha180	elgi	DNApol-alpha180	jvl	Jupiter
Rpn3	elm	DNApol-alpha60	elm	DNApol-alpha60	Jwa	jvl
CG1637	EloA	DNApol-epsilon255	EloA	DNApol-epsilon255	Kal1	Jwa
Cbl	EloB	DNApol-iota	EloB	DNApol-iota	Karybeta3	Kal1
Lmpt	EloC	dnt	EloC	dnt	Kat60	Karybeta3
Sf3a1	Elp2	Doa	Elp2	Doa	kay	Kat60
Aatf	Elp3	dock	Elp3	dock	Kcmf1	kay
CG10492	Elys	dod	Elys	dod	KdelR	Kcmf1
CG10376	ema	dop	ema	dop	Kdm2	KdelR
CG31122	emb	DOR	emb	DOR	kdn	Kdm2
endos	emc	dos	emc	dos	Keap1	kdn
CG10254	EMC1	Dp	EMC1	Dp	kek1	Keap1
Pop2	EMC8-9	Dp1	EMC8-9	Dp1	kek5	kek1
rb	ena	Dpck	ena	Dpck	kel	kek5
Agpat3	enc	Dph1	enc	Dph1	ken	kel
CG43367	EndoA	DppIII	EndoA	DppIII	kermit	ken
CG6420	EndoB	Dpy-30L1	EndoB	Dpy-30L1	Khc-73	kermit
l(2)gd1	EndoGI	Drak	EndoGI	Drak	kibra	Khc-73
RpI1	endos	Drat	endos	Drat	kin17	kibra
UbcE2M	Eno	dre4	Eno	dre4	kis	kin17
psidin	enok	Dredd	enok	Dredd	klar	kis
Cbp80	ens	Dref	ens	Dref	Klp68D	klar
nAChRbeta3	Ent1	Drice	Ent1	Drice	Klp98A	Klp68D
Pits	Eogt	Droj2	Eogt	Droj2	koi	Klp98A
ovo	Epg5	drongo	Epg5	drongo	Kr-h1	koi
CG12004	Eph	Drp1	Eph	Drp1	kra	kra
Sdc	epsilonCOP	Dscam1	epsilonCOP	Dscam1	KrT95D	Kr-h1
ast	eRF1	dsh	eRF1	dsh	kst	KrT95D
eco	eRF3	Dsp1	eRF3	Dsp1	kto	kst
fliI	ergic53	dtn	ergic53	dtn	Ku80	kto
CG10960	ERp60	Duba	ERp60	Duba	kug	Ku80
CG6729	Es2	DUBAI	Es2	DUBAI	kune	kug
Dyrk2	esc	dwg	esc	dwg	kuz	kune
Prosbeta2	Esyt2	Dyb	Esyt2	Dyb	Kyat	kuz
Tango5	Etf-QO	Dyrk2	Etf-QO	Dyrk2	l(1)G0007	Kyat
cdm	ETHR	Dys	ETHR	Dys	l(1)G0193	l(1)G0007
CG11141	Etl1	dysc	Etl1	dysc	l(1)G0196	l(1)G0193
IntS2	Ets21C	E(bx)	Ets21C	E(bx)	l(1)G0289	l(1)G0196
Taldo	Ets97D	E(Pc)	Ets97D	E(Pc)	l(2)09851	l(1)G0289
AIMP2	Evi5	e(r)	Evi5	e(r)	l(2)37Cg	l(2)09851
Srp54k	ewg	e(y)1	ewg	e(y)1	l(2)dtl	l(2)37Cg
asRNA:CR46104	ex	e(y)3	ex	e(y)3	l(2)gl	l(2)dtl
cact	exd	E2f1	exd	E2f1	l(2)k01209	l(2)gl
Mer	Exd2	E2f2	Exd2	E2f2	l(2)k09913	l(2)k01209
smash	Exn	Eaf	Exn	Eaf	l(2)k14505	l(2)k09913
zetaCOP	Exo70	eas	Exo70	eas	l(2)SH0834	l(2)k14505
Surf4	exu	east	exu	east	l(3)05822	l(2)SH0834
Pp1alpha-96A	fabp	Eato	fabp	Eato	l(3)L1231	l(3)05822
pygo	Fadd	Eb1	Fadd	Eb1	l(3)psg2	l(3)L1231
Usp14	faf	ebd1	faf	ebd1	L2HGDH	l(3)psg2
exd	Faf2	ebd2	Faf2	ebd2	La	L2HGDH
unc-45	Fak	ebo	Fak	ebo	Lac	La
CG8602	Fancd2	ec	Fancd2	ec	lace	Lac
Usp16-45	FANCI	ecd	FANCI	ecd	lama	lace
Axn	Fancm	Echs1	Fancm	Echs1	LamC	lama
CG1737	Fas2	eco	Fas2	eco	Lamp1	LamC
Nop17l	FASN1	EcR	FASN1	EcR	LanA	Lamp1
Rab2	fax	ECSIT	fax	ECSIT	LanB1	LanA
dtn	fbl	Ect3	fbl	Ect3	LanB2	LanB1
Bx42	Fbl6	Ect4	Fbl6	Ect4	lap	LanB2
Cdc27	FBXO11	Edc3	FBXO11	Edc3	Lap1	lap
CG4259	Fdh	Edem1	Fdh	Edem1	larp	Lap1
CG7154	fdl	edl	fdl	edl	Larp4B	larp
Mec2	Fdx1	EDTP	Fdx1	EDTP	Larp7	Larp4B
Rab7	FeCH	eEF1alpha1	FeCH	eEF1alpha1	Las	Larp7
U2af50	Fem-1	eEF1beta	Fem-1	eEF1beta	lawc	Las
Skp2	FER	eEF1delta	FER	eEF1delta	Ldh	lawc
Smox	Fer1HCH	eEF1gamma	Fer1HCH	eEF1gamma	lectin-46Cb	Ldh
baz	Fer2LCH	eEF2	Fer2LCH	eEF2	lid	lectin-46Cb
CG13868	Fgop2	eEF5	Fgop2	eEF5	lig	lid
CG3530	Fhos	Efa6	Fhos	Efa6	lili	lig
Cip4	Fibp	eff	Fibp	eff	lilli	lili
CG1620	Fic	Efr	Fic	Efr	LIMK1	lilli
Rab8	FIG4	egh	FIG4	egh	Liprin-alpha	LIMK1
CG15012	Fim	egl	Fim	egl	Liprin-beta	Liprin-alpha
Rpt3	Fis1	Egm	Fis1	Egm	Lis-1	Liprin-beta
spd-2	Fkbp12	egr	Fkbp12	egr	Lk6	Lis-1
su(Hw)	Fkbp14	Ehbp1	Fkbp14	Ehbp1	LManII	Lk6
CG42724	Fkbp39	eIF2alpha	Fkbp39	eIF2alpha	Lmpt	LManII
CG6418	Fkbp59	eIF2Bdelta	Fkbp59	eIF2Bdelta	lncRNA:CR31044	Lmpt
phol	fl(2)d	eIF2beta	fl(2)d	eIF2beta	lncRNA:CR40469	lncRNA:CR31044
sra	flfl	eIF2gamma	flfl	eIF2gamma	lncRNA:CR42862	lncRNA:CR40469
BubR1	fliI	eIF3c	fliI	eIF3c	lncRNA:CR43334	lncRNA:CR42862
CG4751	Flo1	eIF3d1	Flo1	eIF3d1	lncRNA:CR43423	lncRNA:CR43334
DCTN2-p50	Flo2	eIF3f1	Flo2	eIF3f1	lncRNA:CR43685	lncRNA:CR43423
MED19	flr	eIF3g1	flr	eIF3g1	lncRNA:CR43883	lncRNA:CR43685
TTLL4A	flw	eIF3h	flw	eIF3h	lncRNA:CR44138	lncRNA:CR43883
asRNA:CR45871	Fmo-2	eIF3i	Fmo-2	eIF3i	lncRNA:CR44331	lncRNA:CR44138
mmy	Fmr1	eIF3j	Fmr1	eIF3j	lncRNA:CR44953	lncRNA:CR44331
Bub1	fmt	eIF3k	fmt	eIF3k	lncRNA:CR45018	lncRNA:CR44953
CG3847	Fnta	eIF4A	Fnta	eIF4A	lncRNA:CR45048	lncRNA:CR45018
COX4	fog	eIF4E1	fog	eIF4E1	lncRNA:CR45962	lncRNA:CR45048
Shark	foi	eIF4EHP	foi	eIF4EHP	lncRNA:CR45973	lncRNA:CR45962
Usp32	fok	eIF4G1	fok	eIF4G1	lncRNA:CR46258	lncRNA:CR45973
Alg1	for	eIF4H1	for	eIF4H1	lncRNA:Hsromega	lncRNA:CR46258
CG7456	FoxK	eIF5B	FoxK	eIF5B	lncRNA:roX2	lncRNA:Hsromega
Mctp	foxo	Eip55E	foxo	Eip55E	Lnk	lncRNA:roX2
casp	fra	Eip63E	fra	Eip63E	Lnpk	Lnk
e(r)	fray	Eip74EF	fray	Eip74EF	loco	Lnpk
ec	FRG1	Eip75B	FRG1	Eip75B	lola	loco
r-l	frj	EloA	frj	EloA	lolal	lola
Myd88	frtz	EloB	frtz	EloB	Lon	lolal
Ptpmeg	fru	EloC	fru	EloC	LPCAT	Lon
Rpn9	fry	Elp2	fry	Elp2	Lpin	LPCAT
gbb	fs(1)h	ema	fs(1)h	ema	LpR2	Lpin
wgn	Fs(2)Ket	emb	Fs(2)Ket	emb	lqf	LpR2
CG2186	fs(2)ltoPP43	emc	fs(2)ltoPP43	emc	LRP1	lqf
GramD1B	ftz-f1	EMC1	ftz-f1	EMC1	LRR	LRP1
Rilpl	fu	EMC8-9	fu	EMC8-9	Lrrk	LRR
[truncated: 4,444 more rows]
