# Supplementary material for: Interplay Between BALL and CREB Binding Protein Maintains H3K27 Acetylation on Active Genes in Drosophila
Source: Front Cell Dev Biol. 2021 Sep 28;9:740866. doi: 10.3389/fcell.2021.740866 (PMC8509297; doi:10.3389/fcell.2021.740866)
Supplement: Supplementary file 2 [file Table_2.XLSX]

## Sheet: CBP & BALL cobound peaks
Chrom	Start	End	Filter_SAM_or_BAM__output_SAM_or_BAM_on_data_207__bam_peak_2	X87	.	X2.70627	X10.41792	X8.70929	X121	annotation	geneChr	geneStart	geneEnd	geneLength	geneStrand	transcriptId	distanceToTSS	geneName	geneId
chr4	1112824	1113292	Filter_SAM_or_BAM__output_SAM_or_BAM_on_data_207__bam_peak_9575	397	.	2.89536	42.1429	39.7261	240	3' UTR	5	1112874	1122965	10092	2	NM_001297793	9673	Cals	Cals
chr2L	18513419	18513717	Filter_SAM_or_BAM__output_SAM_or_BAM_on_data_207__bam_peak_1733	493	.	5.8008	51.9972	49.3862	135	3' UTR	1	18517487	18531780	14294	1	NM_136039	-3770	CG10211	CG10211
chr2L	15096769	15097105	Filter_SAM_or_BAM__output_SAM_or_BAM_on_data_207__bam_peak_1506	171	.	2.57617	19.0692	17.1335	171	3' UTR	1	15109405	15113092	3688	1	NM_135895	-12300	CG15269	CG15269
chrX	4657960	4658275	Filter_SAM_or_BAM__output_SAM_or_BAM_on_data_207__bam_peak_10012	591	.	5.31988	61.9262	59.1162	155	3' UTR	6	4651955	4654497	2543	2	NM_131951	-3464	CG15473	CG15473
chr3L	2499191	2499398	Filter_SAM_or_BAM__output_SAM_or_BAM_on_data_207__bam_peak_4625	226	.	3.49404	24.7638	22.6996	99	3' UTR	3	2499372	2502815	3444	2	NM_206247	3417	CG16758	CG16758
chrX	796298	797009	Filter_SAM_or_BAM__output_SAM_or_BAM_on_data_207__bam_peak_9642	222	.	3.39887	24.3524	22.2972	554	3' UTR	6	793147	797061	3915	1	NM_001297832	3152	CG16989	CG16989
chr2R	9540375	9540782	Filter_SAM_or_BAM__output_SAM_or_BAM_on_data_207__bam_peak_2562	591	.	3.7611	61.9121	59.1023	154	3' UTR	2	9541947	9546958	5012	2	NM_001273899	6176	CG1888	CG1888
chr3R	15688503	15688814	Filter_SAM_or_BAM__output_SAM_or_BAM_on_data_207__bam_peak_7868	475	.	3.99173	50.1304	47.556	158	3' UTR	4	15693086	15694194	1109	1	NM_001275681	-4272	CG31446	CG31446
chrX	6719346	6719726	Filter_SAM_or_BAM__output_SAM_or_BAM_on_data_207__bam_peak_10204	156	.	3.39865	17.5428	15.6427	235	3' UTR	6	6720475	6727229	6755	2	NM_001298030	7503	CG3168	CG3168
chrX	17751622	17751990	Filter_SAM_or_BAM__output_SAM_or_BAM_on_data_207__bam_peak_11223	372	.	3.98987	39.5868	37.2212	194	3' UTR	6	17738413	17751685	13273	1	NM_001298459	13210	CG42684	CG42684
chr3R	9359430	9359623	Filter_SAM_or_BAM__output_SAM_or_BAM_on_data_207__bam_peak_7229	70	.	2.05045	8.69631	7.0427	115	3' UTR	4	9355956	9359189	3234	1	NM_001300318	3475	CG45050	CG45050
chrX	5992166	5992516	Filter_SAM_or_BAM__output_SAM_or_BAM_on_data_207__bam_peak_10137	861	.	6.58965	89.5386	86.1074	166	3' UTR	6	5988791	5992640	3850	1	NM_132058	3376	CG5966	CG5966
chr3L	12007970	12008356	Filter_SAM_or_BAM__output_SAM_or_BAM_on_data_207__bam_peak_5571	597	.	3.95961	62.5432	59.7197	205	3' UTR	3	12004393	12008051	3659	1	NM_168486	3578	CG6928	CG6928
chr3R	22794001	22794315	Filter_SAM_or_BAM__output_SAM_or_BAM_on_data_207__bam_peak_8604	224	.	3.86021	24.5007	22.4426	165	3' UTR	4	22804291	22806489	2199	1	NM_142844	-9976	CG7031	CG7031
chrX	7241874	7242204	Filter_SAM_or_BAM__output_SAM_or_BAM_on_data_207__bam_peak_10254	642	.	8.4221	67.1534	64.232	158	3' UTR	6	7226455	7241538	15084	1	NM_001370055	15420	CG9650	CG9650
chr3R	27082752	27083110	Filter_SAM_or_BAM__output_SAM_or_BAM_on_data_207__bam_peak_9047	710	.	6.13269	74.1279	71.055	174	3' UTR	4	27083130	27086619	3490	2	NM_143272	3509	Cpr97Ea	Cpr97Ea
chrX	2112591	2113111	Filter_SAM_or_BAM__output_SAM_or_BAM_on_data_207__bam_peak_9769	1011	.	6.49634	105.002	101.197	235	3' UTR	6	2108249	2113664	5416	1	NM_166928	4343	csw	csw
chrX	19028523	19028931	Filter_SAM_or_BAM__output_SAM_or_BAM_on_data_207__bam_peak_11307	163	.	3.24755	18.234	16.3177	161	3' UTR	6	19050442	19050975	534	1	NM_001103558	-21511	Diedel3	Diedel3
chr2L	6526941	6527295	Filter_SAM_or_BAM__output_SAM_or_BAM_on_data_207__bam_peak_655	515	.	3.90254	54.2152	51.5611	169	3' UTR	1	6527447	6530509	3063	2	NM_001258984	3214	eya	eya
chr3R	22681570	22681786	Filter_SAM_or_BAM__output_SAM_or_BAM_on_data_207__bam_peak_8588	130	.	3.0393	14.8915	13.0584	82	3' UTR	4	22685006	22686510	1505	2	NM_001275916	4724	Gclm	Gclm
chr3R	9954453	9955163	Filter_SAM_or_BAM__output_SAM_or_BAM_on_data_207__bam_peak_7311	381	.	4.07218	40.5201	38.1359	187	3' UTR	4	9928917	9995364	66448	1	NM_001260083	25537	Glut4EF	Glut4EF
chr3R	6392936	6393239	Filter_SAM_or_BAM__output_SAM_or_BAM_on_data_207__bam_peak_6939	83	.	1.94119	10.0628	8.36502	178	3' UTR	4	6384335	6388304	3970	1	NM_169140	8602	godzilla	godzilla
chr3R	31945655	31946000	Filter_SAM_or_BAM__output_SAM_or_BAM_on_data_207__bam_peak_9485	451	.	4.8043	47.6353	45.11	184	3' UTR	4	31851020	31937392	86373	2	NM_001170321	-8264	heph	heph
chr3R	5268545	5268871	Filter_SAM_or_BAM__output_SAM_or_BAM_on_data_207__bam_peak_6841	571	.	4.40446	59.9437	57.1748	153	3' UTR	4	5264939	5269507	4569	1	NM_169037	3607	Hph	Hph
chr2L	15504612	15504877	Filter_SAM_or_BAM__output_SAM_or_BAM_on_data_207__bam_peak_1525	124	.	2.46958	14.3029	12.4853	136	3' UTR	1	15499127	15505018	5892	1	NM_057266	5486	lace	lace
chr3R	16004049	16004428	Filter_SAM_or_BAM__output_SAM_or_BAM_on_data_207__bam_peak_7899	220	.	2.39009	24.0498	22.0011	198	3' UTR	4	16004321	16008073	3753	2	NR_048407	3645	lncRNA:CR42839	lncRNA:CR42839
chr2L	5365748	5366305	Filter_SAM_or_BAM__output_SAM_or_BAM_on_data_207__bam_peak_563	1118	.	5.41831	115.887	111.822	347	3' UTR	1	5379095	5381074	1980	2	NR_124086	14769	lncRNA:CR42850	lncRNA:CR42850
chrX	3343756	3344138	Filter_SAM_or_BAM__output_SAM_or_BAM_on_data_207__bam_peak_9896	123	.	2.90571	14.1347	12.3221	168	3' UTR	6	3313333	3348400	35068	2	NR_123781	4262	lncRNA:CR44886	lncRNA:CR44886
chrX	13134809	13135159	Filter_SAM_or_BAM__output_SAM_or_BAM_on_data_207__bam_peak_10780	475	.	4.17778	50.1634	47.588	166	3' UTR	6	13131516	13134565	3050	1	NM_132629	3294	MFS10	MFS10
chr3R	21626518	21626961	Filter_SAM_or_BAM__output_SAM_or_BAM_on_data_207__bam_peak_8468	337	.	2.74863	36.002	33.7082	268	3' UTR	4	21622497	21622571	75	2	NR_048453	-3948	mir-11	mir-11
chrX	2005887	2006092	Filter_SAM_or_BAM__output_SAM_or_BAM_on_data_207__bam_peak_9747	82	.	2.82899	9.92994	8.23679	114	3' UTR	6	2007911	2009364	1454	2	NM_130612	3272	PIG-K	PIG-K
chr2L	20783068	20783451	Filter_SAM_or_BAM__output_SAM_or_BAM_on_data_207__bam_peak_1940	384	.	3.72753	40.8623	38.4715	295	3' UTR	1	20787656	20789098	1443	1	NM_136213	-4205	Pomp	Pomp
chrX	21060519	21060942	Filter_SAM_or_BAM__output_SAM_or_BAM_on_data_207__bam_peak_11432	195	.	2.76172	21.5626	19.5693	178	5' UTR	6	21062422	21064190	1769	2	NM_001272825	3248	CG32512	CG32512
chr3R	27057845	27058210	Filter_SAM_or_BAM__output_SAM_or_BAM_on_data_207__bam_peak_9043	947	.	4.88828	98.4376	94.7972	185	5' UTR	4	27062216	27063059	844	1	NM_001104471	-4006	CG34292	CG34292
chr3R	19044758	19044958	Filter_SAM_or_BAM__output_SAM_or_BAM_on_data_207__bam_peak_8195	64	.	2.31	8.08952	6.45562	57	5' UTR	4	19033538	19044693	11156	1	NM_142521	11221	CG6026	CG6026
chrX	17175801	17176110	Filter_SAM_or_BAM__output_SAM_or_BAM_on_data_207__bam_peak_11161	436	.	4.18285	46.1402	43.6437	157	5' UTR	6	17182880	17183242	363	2	NR_073660	7132	lncRNA:CR44026	lncRNA:CR44026
chr2R	20106198	20106894	Filter_SAM_or_BAM__output_SAM_or_BAM_on_data_207__bam_peak_3811	1180	.	8.54923	122.232	118.017	357	Distal Intergenic	2	20111511	20116932	5422	1	NM_057466	-4617	18w	18w
chr2R	20937991	20938427	Filter_SAM_or_BAM__output_SAM_or_BAM_on_data_207__bam_peak_3863	523	.	7.47004	54.9927	52.3236	217	Distal Intergenic	2	20944021	20946431	2411	1	NM_079076	-5594	Act57B	Act57B
chr2R	17114782	17115118	Filter_SAM_or_BAM__output_SAM_or_BAM_on_data_207__bam_peak_3495	160	.	3.53883	17.9837	16.0728	149	Distal Intergenic	2	17118636	17120303	1668	2	NM_001299589	5185	Amy-p	Amy-p
chr2R	5735719	5736377	Filter_SAM_or_BAM__output_SAM_or_BAM_on_data_207__bam_peak_2138	321	.	2.98153	34.3627	32.1017	542	Distal Intergenic	2	5707224	5727525	20302	2	NM_001169588	-8195	ap	ap
chr3R	28345276	28345602	Filter_SAM_or_BAM__output_SAM_or_BAM_on_data_207__bam_peak_9135	370	.	5.25462	39.3731	37.0116	182	Distal Intergenic	4	28340412	28340800	389	2	NR_133476	-4477	asRNA:CR46105	asRNA:CR46105
chr3L	15267807	15268076	Filter_SAM_or_BAM__output_SAM_or_BAM_on_data_207__bam_peak_5835	247	.	4.98002	26.8498	24.7414	112	Distal Intergenic	3	15298958	15300942	1985	1	NM_001104139	-30882	Best4	Best4
chr4	1295024	1295375	Filter_SAM_or_BAM__output_SAM_or_BAM_on_data_207__bam_peak_9585	79	.	1.83997	9.6761	7.99051	185	Distal Intergenic	5	1231883	1271759	39877	1	NM_001258511	63142	Cadps	Cadps
chr4	1305819	1306907	Filter_SAM_or_BAM__output_SAM_or_BAM_on_data_207__bam_peak_9586	363	.	2.54981	38.7032	36.3552	890	Distal Intergenic	5	1231883	1271759	39877	1	NM_001258511	73937	Cadps	Cadps
chr4	1318111	1319341	Filter_SAM_or_BAM__output_SAM_or_BAM_on_data_207__bam_peak_9587	582	.	4.18051	60.9993	58.2086	700	Distal Intergenic	5	1231883	1271759	39877	1	NM_001258511	86229	Cadps	Cadps
chr2L	20120796	20121332	Filter_SAM_or_BAM__output_SAM_or_BAM_on_data_207__bam_peak_1895	1199	.	6.41659	124.241	119.974	347	Distal Intergenic	1	20133755	20134923	1169	2	NM_001299166	13591	CG10651	CG10651
chr2L	20148505	20148765	Filter_SAM_or_BAM__output_SAM_or_BAM_on_data_207__bam_peak_1896	223	.	4.1733	24.4271	22.3704	147	Distal Intergenic	1	20133805	20134923	1119	2	NM_136185	-13583	CG10651	CG10651
chr2R	20226993	20227404	Filter_SAM_or_BAM__output_SAM_or_BAM_on_data_207__bam_peak_3823	390	.	5.60936	41.4172	39.0154	287	Distal Intergenic	2	20231829	20234927	3099	1	NM_137612	-4425	CG11044	CG11044
chr3R	4969262	4969544	Filter_SAM_or_BAM__output_SAM_or_BAM_on_data_207__bam_peak_6808	437	.	4.73151	46.2415	43.7433	122	Distal Intergenic	4	4965445	4968485	3041	1	NM_141252	3818	CG1124	CG1124
chr3R	4970505	4971194	Filter_SAM_or_BAM__output_SAM_or_BAM_on_data_207__bam_peak_6809	567	.	3.40436	59.5111	56.7505	383	Distal Intergenic	4	4965445	4968485	3041	1	NM_141252	5061	CG1124	CG1124
chr3R	4973252	4973552	Filter_SAM_or_BAM__output_SAM_or_BAM_on_data_207__bam_peak_6810	179	.	3.51031	19.9372	17.9806	140	Distal Intergenic	4	4965445	4968485	3041	1	NM_141252	7808	CG1124	CG1124
chr3R	31086444	31086686	Filter_SAM_or_BAM__output_SAM_or_BAM_on_data_207__bam_peak_9417	247	.	4.1089	26.8823	24.7731	111	Distal Intergenic	4	31090712	31097321	6610	2	NM_001276204	10635	CG11317	CG11317
chr3L	90861	91086	Filter_SAM_or_BAM__output_SAM_or_BAM_on_data_207__bam_peak_4331	146	.	2.94815	16.4737	14.6006	149	Distal Intergenic	3	97628	98375	748	2	NM_144069	7289	CG12483	CG12483
chr3L	92037	92271	Filter_SAM_or_BAM__output_SAM_or_BAM_on_data_207__bam_peak_4332	218	.	3.02723	23.8445	21.8007	161	Distal Intergenic	3	97628	98375	748	2	NM_144069	6104	CG12483	CG12483
chr3L	103549	103771	Filter_SAM_or_BAM__output_SAM_or_BAM_on_data_207__bam_peak_4333	148	.	2.58869	16.7068	14.8276	95	Distal Intergenic	3	97628	98375	748	2	NM_144069	-5175	CG12483	CG12483
chr3L	104130	104506	Filter_SAM_or_BAM__output_SAM_or_BAM_on_data_207__bam_peak_4334	380	.	3.35706	40.424	38.0419	233	Distal Intergenic	3	97628	98375	748	2	NM_144069	-5756	CG12483	CG12483
chr2L	20287331	20287607	Filter_SAM_or_BAM__output_SAM_or_BAM_on_data_207__bam_peak_1905	207	.	3.51374	22.8081	20.7868	121	Distal Intergenic	1	20294693	20295320	628	1	NM_144332	-7086	CG12617	CG12617
chr2L	20290613	20291087	Filter_SAM_or_BAM__output_SAM_or_BAM_on_data_207__bam_peak_1906	371	.	3.3428	39.5311	37.1668	185	Distal Intergenic	1	20294693	20295320	628	1	NM_144332	-3606	CG12617	CG12617
chr2R	12957395	12957617	Filter_SAM_or_BAM__output_SAM_or_BAM_on_data_207__bam_peak_3010	84	.	2.26291	10.2014	8.4992	119	Distal Intergenic	2	12953553	12955170	1618	1	NM_136987	3843	CG13321	CG13321
chr2R	13032194	13032608	Filter_SAM_or_BAM__output_SAM_or_BAM_on_data_207__bam_peak_3027	487	.	3.92975	51.4001	48.8	168	Distal Intergenic	2	13044695	13047256	2562	2	NM_001299441	14648	CG13323	CG13323
chr2R	13035057	13035835	Filter_SAM_or_BAM__output_SAM_or_BAM_on_data_207__bam_peak_3029	503	.	4.25749	53.01	50.379	239	Distal Intergenic	2	13044695	13047256	2562	2	NM_001299441	11421	CG13323	CG13323
chr2R	13038653	13039195	Filter_SAM_or_BAM__output_SAM_or_BAM_on_data_207__bam_peak_3030	611	.	6.55935	64.018	61.164	253	Distal Intergenic	2	13044695	13047256	2562	2	NM_001299441	8061	CG13323	CG13323
chr3L	784756	784945	Filter_SAM_or_BAM__output_SAM_or_BAM_on_data_207__bam_peak_4438	140	.	3.39428	15.9254	14.0661	183	Distal Intergenic	3	803427	804051	625	2	NM_138214	19106	CG13898	CG13898
chr2L	8334815	8335079	Filter_SAM_or_BAM__output_SAM_or_BAM_on_data_207__bam_peak_878	274	.	3.48369	29.5873	27.4226	93	Distal Intergenic	1	8338287	8342056	3770	1	NM_135368	-3208	CG14274	CG14274
chr3R	29287295	29287770	Filter_SAM_or_BAM__output_SAM_or_BAM_on_data_207__bam_peak_9228	617	.	4.59634	64.6405	61.7727	239	Distal Intergenic	4	29293743	29297180	3438	2	NM_001276138	9410	CG14506	CG14506
chrX	22433077	22433285	Filter_SAM_or_BAM__output_SAM_or_BAM_on_data_207__bam_peak_11479	199	.	4.26063	21.9926	19.9897	91	Distal Intergenic	6	22444227	22447181	2955	1	NM_001298593	-10942	CG14621	CG14621
chr3R	4835227	4835686	Filter_SAM_or_BAM__output_SAM_or_BAM_on_data_207__bam_peak_6798	923	.	7.23649	95.9579	92.376	270	Distal Intergenic	4	4830849	4831297	449	2	NM_141246	-3931	CG14659	CG14659
chr3L	4440295	4440497	Filter_SAM_or_BAM__output_SAM_or_BAM_on_data_207__bam_peak_4864	95	.	3.22237	11.2795	9.5461	145	Distal Intergenic	3	4436721	4438311	1591	1	NM_139645	3575	CG15021	CG15021
chr2L	14706122	14706635	Filter_SAM_or_BAM__output_SAM_or_BAM_on_data_207__bam_peak_1491	1246	.	6.93846	129.068	124.676	246	Distal Intergenic	1	14712471	14713118	648	1	NM_001299010	-5836	CG15282	CG15282
chr2R	16800021	16800391	Filter_SAM_or_BAM__output_SAM_or_BAM_on_data_207__bam_peak_3441	322	.	2.84116	34.5095	32.2452	181	Distal Intergenic	2	16793119	16796407	3289	2	NM_137315	-3615	CG15615	CG15615
chr2R	20184688	20184888	Filter_SAM_or_BAM__output_SAM_or_BAM_on_data_207__bam_peak_3820	62	.	2.46646	7.85402	6.22762	169	Distal Intergenic	2	20211585	20212619	1035	2	NM_137611	27731	CG16894	CG16894
chr2R	13304147	13304448	Filter_SAM_or_BAM__output_SAM_or_BAM_on_data_207__bam_peak_3050	82	.	2.71479	9.98131	8.28693	188	Distal Intergenic	2	13299599	13301547	1949	1	NM_137021	4549	CG17047	CG17047
chr2L	10671615	10671895	Filter_SAM_or_BAM__output_SAM_or_BAM_on_data_207__bam_peak_1154	414	.	3.9832	43.9311	41.4793	108	Distal Intergenic	1	10677198	10679707	2510	1	NM_001273429	-5303	CG17104	CG17104
chr3L	673354	673853	Filter_SAM_or_BAM__output_SAM_or_BAM_on_data_207__bam_peak_4422	1567	.	14.6061	161.948	156.706	239	Distal Intergenic	3	677879	680326	2448	2	NM_138204	6473	CG17129	CG17129
chrX	22552989	22553224	Filter_SAM_or_BAM__output_SAM_or_BAM_on_data_207__bam_peak_11497	82	.	2.33804	9.9946	8.29993	32	Distal Intergenic	6	22547097	22548056	960	1	NM_134627	5893	CG17601	CG17601
chr3R	26103517	26103725	Filter_SAM_or_BAM__output_SAM_or_BAM_on_data_207__bam_peak_8955	131	.	2.83619	15.0242	13.1879	157	Distal Intergenic	4	26106868	26130190	23323	1	NM_170259	-3143	CG31324	CG31324
chr2L	13732237	13732601	Filter_SAM_or_BAM__output_SAM_or_BAM_on_data_207__bam_peak_1406	472	.	4.06796	49.8145	47.2458	159	Distal Intergenic	1	13736138	13736790	653	1	NM_165053	-3537	CG31813	CG31813
chr3L	13934836	13935209	Filter_SAM_or_BAM__output_SAM_or_BAM_on_data_207__bam_peak_5703	567	.	5.27172	59.545	56.7835	149	Distal Intergenic	3	13939250	13962647	23398	1	NM_168563	-4041	CG32137	CG32137
chr3L	22982096	22982336	Filter_SAM_or_BAM__output_SAM_or_BAM_on_data_207__bam_peak_6682	186	.	2.44727	20.616	18.6442	158	Distal Intergenic	3	22987642	22988262	621	1	NM_001170026	-5306	CG32457	CG32457
chrX	2419482	2419929	Filter_SAM_or_BAM__output_SAM_or_BAM_on_data_207__bam_peak_9820	411	.	4.07056	43.6189	41.1735	260	Distal Intergenic	6	2424925	2425855	931	2	NM_166939	5926	CG32797	CG32797
chr2R	21596116	21596380	Filter_SAM_or_BAM__output_SAM_or_BAM_on_data_207__bam_peak_3950	389	.	5.12404	41.3385	38.938	109	Distal Intergenic	2	21590432	21591584	1153	1	NM_206196	5685	CG33225	CG33225
chrX	5289679	5290067	Filter_SAM_or_BAM__output_SAM_or_BAM_on_data_207__bam_peak_10052	456	.	4.3486	48.1443	45.6082	201	Distal Intergenic	6	5296066	5302894	6829	1	NM_131981	-5999	CG42749	CG42749
chr3L	10736722	10737450	Filter_SAM_or_BAM__output_SAM_or_BAM_on_data_207__bam_peak_5426	1074	.	4.75027	111.365	107.405	755	Distal Intergenic	3	10771925	10773399	1475	1	NM_001259780	-34475	CG43245	CG43245
chr3L	10738335	10738737	Filter_SAM_or_BAM__output_SAM_or_BAM_on_data_207__bam_peak_5427	820	.	5.33464	85.3478	82.0191	186	Distal Intergenic	3	10771925	10773399	1475	1	NM_001259780	-33188	CG43245	CG43245
chr3L	10739034	10739568	Filter_SAM_or_BAM__output_SAM_or_BAM_on_data_207__bam_peak_5428	596	.	4.5822	62.4987	59.6767	181	Distal Intergenic	3	10771925	10773399	1475	1	NM_001259780	-32357	CG43245	CG43245
chr3L	10775714	10776117	Filter_SAM_or_BAM__output_SAM_or_BAM_on_data_207__bam_peak_5432	696	.	4.41102	72.7345	69.6924	300	Distal Intergenic	3	10771925	10773399	1475	1	NM_001274759	3790	CG43245	CG43245
chr3L	10776586	10776954	Filter_SAM_or_BAM__output_SAM_or_BAM_on_data_207__bam_peak_5432	696	.	4.41102	72.7345	69.6924	300	Distal Intergenic	3	10771925	10773399	1475	1	NM_001274759	4662	CG43245	CG43245
chr3R	15650784	15651306	Filter_SAM_or_BAM__output_SAM_or_BAM_on_data_207__bam_peak_7862	750	.	7.70181	78.1857	75.0212	195	Distal Intergenic	4	15637168	15638181	1014	1	NM_001260193	13617	CG43336	CG43336
chr2L	11474979	11475352	Filter_SAM_or_BAM__output_SAM_or_BAM_on_data_207__bam_peak_1207	545	.	4.109	57.253	54.5389	188	Distal Intergenic	1	11484707	11486949	2243	1	NM_001259059	-9355	CG43355	CG43355
chr2L	1462360	1462885	Filter_SAM_or_BAM__output_SAM_or_BAM_on_data_207__bam_peak_172	188	.	2.91957	20.7838	18.808	462	Distal Intergenic	1	1442726	1443316	591	1	NM_001258909	19635	CG43402	CG43402
chr2R	21848491	21848693	Filter_SAM_or_BAM__output_SAM_or_BAM_on_data_207__bam_peak_3980	179	.	2.43532	19.903	17.9475	194	Distal Intergenic	2	21837605	21838798	1194	2	NM_137771	-9694	CG4372	CG4372
chr3R	20066589	20066813	Filter_SAM_or_BAM__output_SAM_or_BAM_on_data_207__bam_peak_8286	73	.	2.02781	9.02046	7.35686	113	Distal Intergenic	4	20056418	20059750	3333	2	NM_169887	-6840	CG4390	CG4390
chr2L	14094582	14094982	Filter_SAM_or_BAM__output_SAM_or_BAM_on_data_207__bam_peak_1442	509	.	4.46275	53.5742	50.9323	162	Distal Intergenic	1	14104090	14106791	2702	1	NM_001347776	-9108	CG46301	CG46301
chr3R	20154719	20154956	Filter_SAM_or_BAM__output_SAM_or_BAM_on_data_207__bam_peak_8287	93	.	2.71464	11.1178	9.38844	138	Distal Intergenic	4	20169435	20174872	5438	1	NM_142610	-14479	CG5023	CG5023
chr3L	17916044	17916564	Filter_SAM_or_BAM__output_SAM_or_BAM_on_data_207__bam_peak_6150	424	.	3.92999	44.8818	42.4109	406	Distal Intergenic	3	17909483	17912565	3083	2	NM_140769	-3480	CG5290	CG5290
chr3L	17922217	17922517	Filter_SAM_or_BAM__output_SAM_or_BAM_on_data_207__bam_peak_6152	979	.	6.38186	101.711	97.9898	834	Distal Intergenic	3	17909483	17912565	3083	2	NM_140769	-9653	CG5290	CG5290
chr3L	17922703	17923090	Filter_SAM_or_BAM__output_SAM_or_BAM_on_data_207__bam_peak_6152	979	.	6.38186	101.711	97.9898	834	Distal Intergenic	3	17909483	17912565	3083	2	NM_140769	-10139	CG5290	CG5290
chrX	17305558	17305867	Filter_SAM_or_BAM__output_SAM_or_BAM_on_data_207__bam_peak_11177	337	.	3.74899	36.0125	33.7183	130	Distal Intergenic	6	17302470	17305475	3006	1	NM_176748	3089	CG5445	CG5445
chr2L	18298049	18298352	Filter_SAM_or_BAM__output_SAM_or_BAM_on_data_207__bam_peak_1720	173	.	3.52677	19.3391	17.3967	179	Distal Intergenic	1	18294840	18297347	2508	1	NM_001299108	3210	CG5790	CG5790
chr3R	22093942	22094337	Filter_SAM_or_BAM__output_SAM_or_BAM_on_data_207__bam_peak_8525	118	.	2.13531	13.6049	11.806	158	Distal Intergenic	4	22087183	22088501	1319	1	NM_001316505	6760	CG5791	CG5791
chr2R	13761573	13761777	Filter_SAM_or_BAM__output_SAM_or_BAM_on_data_207__bam_peak_3096	48	.	2.06757	6.413	4.84039	32	Distal Intergenic	2	13753964	13758971	5008	1	NM_137054	7610	CG6280	CG6280
chr3R	10664990	10665364	Filter_SAM_or_BAM__output_SAM_or_BAM_on_data_207__bam_peak_7380	394	.	6.3715	41.8569	39.446	190	Distal Intergenic	4	10675560	10677251	1692	2	NM_141747	11887	CG6465	CG6465
chr3L	18957001	18957348	Filter_SAM_or_BAM__output_SAM_or_BAM_on_data_207__bam_peak_6284	381	.	4.15234	40.5473	38.1624	143	Distal Intergenic	3	18950629	18955406	4778	1	NM_140822	6373	CG6836	CG6836
chrX	15653513	15653902	Filter_SAM_or_BAM__output_SAM_or_BAM_on_data_207__bam_peak_10985	222	.	4.1049	24.2721	22.2186	97	Distal Intergenic	6	15662585	15663319	735	1	NM_132822	-8683	CG8119	CG8119
chr2R	25279631	25280243	Filter_SAM_or_BAM__output_SAM_or_BAM_on_data_207__bam_peak_4326	361	.	6.07856	38.5347	36.1902	177	Distal Intergenic	2	25185126	25255318	70193	2	NM_001274250	-24314	CG9380	CG9380
chr2R	25285267	25286002	Filter_SAM_or_BAM__output_SAM_or_BAM_on_data_207__bam_peak_4327	998	.	5.91925	103.638	99.8681	365	Distal Intergenic	2	25185126	25255318	70193	2	NM_001274250	-29950	CG9380	CG9380
chr3L	16741695	16741952	Filter_SAM_or_BAM__output_SAM_or_BAM_on_data_207__bam_peak_6006	229	.	3.37851	25.0612	22.9908	91	Distal Intergenic	3	16733546	16739364	5819	1	NM_140661	8150	CG9701	CG9701
chr2L	13074668	13075106	Filter_SAM_or_BAM__output_SAM_or_BAM_on_data_207__bam_peak_1335	779	.	4.60137	81.231	77.998	175	Distal Intergenic	1	13022671	13060140	37470	2	NM_135755	-14529	CG9932	CG9932
chr3L	21479542	21480038	Filter_SAM_or_BAM__output_SAM_or_BAM_on_data_207__bam_peak_6563	736	.	5.7689	76.7403	73.609	248	Distal Intergenic	3	21474133	21476479	2347	2	NM_079478	-3064	croc	croc
chr3R	29207190	29207289	Filter_SAM_or_BAM__output_SAM_or_BAM_on_data_207__bam_peak_9211	275	.	3.2154	29.741	27.5728	164	Distal Intergenic	4	29202660	29204133	1474	2	NM_143426	-3058	Cyt-c1L	Cyt-c1L
chr3L	1913562	1913859	Filter_SAM_or_BAM__output_SAM_or_BAM_on_data_207__bam_peak_4571	298	.	3.64673	32.0846	29.8695	137	Distal Intergenic	3	1900494	1910197	9704	2	NM_001274370	-3366	dsb	dsb
chr3R	21487709	21488129	Filter_SAM_or_BAM__output_SAM_or_BAM_on_data_207__bam_peak_8440	948	.	6.62472	98.5382	94.8947	235	Distal Intergenic	4	21482325	21487444	5120	1	NM_001275877	5385	Fancm	Fancm
chr3R	14051510	14051880	Filter_SAM_or_BAM__output_SAM_or_BAM_on_data_207__bam_peak_7675	394	.	3.80403	41.8779	39.4665	190	Distal Intergenic	4	14056945	14087978	31034	1	NM_001316497	-5065	foxo	foxo
chr3R	14052367	14052866	Filter_SAM_or_BAM__output_SAM_or_BAM_on_data_207__bam_peak_7676	711	.	4.37379	74.2214	71.1463	390	Distal Intergenic	4	14056945	14087978	31034	1	NM_001316497	-4079	foxo	foxo
chr3R	6870935	6871149	Filter_SAM_or_BAM__output_SAM_or_BAM_on_data_207__bam_peak_6976	94	.	2.41796	11.1492	9.41934	82	Distal Intergenic	4	6864324	6866244	1921	1	NM_058150	6612	ftz	ftz
chr2R	25066220	25066637	Filter_SAM_or_BAM__output_SAM_or_BAM_on_data_207__bam_peak_4308	492	.	4.35378	51.8724	49.2638	363	Distal Intergenic	2	25061964	25064643	2680	1	NM_079139	4257	gsb	gsb
chr3L	8679988	8680614	Filter_SAM_or_BAM__output_SAM_or_BAM_on_data_207__bam_peak_5207	1007	.	5.19974	104.539	100.746	308	Distal Intergenic	3	8675955	8679253	3299	1	NM_079253	4034	h	h
chr3L	14603283	14603523	Filter_SAM_or_BAM__output_SAM_or_BAM_on_data_207__bam_peak_5766	166	.	2.83097	18.6191	16.6933	134	Distal Intergenic	3	14583222	14599540	16319	2	NM_144357	-3744	HGTX	HGTX
chr2L	21553424	21553662	Filter_SAM_or_BAM__output_SAM_or_BAM_on_data_207__bam_peak_2033	254	.	5.05326	27.5878	25.4638	113	Distal Intergenic	1	21538228	21538720	493	1	NM_001032215_10	15197	His2A:CG33865	His2A:CG33865
chr3L	769314	769570	Filter_SAM_or_BAM__output_SAM_or_BAM_on_data_207__bam_peak_4436	384	.	3.65478	40.8791	38.4879	166	Distal Intergenic	3	737680	755489	17810	2	NM_001274293	-13826	hng3	hng3
chr3L	774186	775369	Filter_SAM_or_BAM__output_SAM_or_BAM_on_data_207__bam_peak_4437	717	.	3.81849	74.8539	71.766	331	Distal Intergenic	3	737680	755489	17810	2	NM_001274293	-18698	hng3	hng3
chr3R	18063182	18063566	Filter_SAM_or_BAM__output_SAM_or_BAM_on_data_207__bam_peak_8080	322	.	5.71238	34.4989	32.2349	209	Distal Intergenic	4	18045216	18052984	7769	2	NM_079670	-10199	htl	htl
chr2R	13403652	13403986	Filter_SAM_or_BAM__output_SAM_or_BAM_on_data_207__bam_peak_3060	409	.	5.66283	43.3586	40.9178	136	Distal Intergenic	2	13407011	13408103	1093	1	NM_165982	-3025	IMPPP	IMPPP
chrX	1517670	1517927	Filter_SAM_or_BAM__output_SAM_or_BAM_on_data_207__bam_peak_9702	190	.	4.03864	21.018	19.0373	142	Distal Intergenic	6	1513070	1517615	4546	1	NM_130570	4601	inc	inc
chrX	1517995	1518209	Filter_SAM_or_BAM__output_SAM_or_BAM_on_data_207__bam_peak_9703	183	.	4.01636	20.3279	18.3627	45	Distal Intergenic	6	1513070	1517615	4546	1	NM_130570	4926	inc	inc
chr2L	16374432	16374640	Filter_SAM_or_BAM__output_SAM_or_BAM_on_data_207__bam_peak_1593	126	.	3.15586	14.4631	12.6413	95	Distal Intergenic	1	16365903	16367039	1137	1	NM_001299051	8530	jhamt	jhamt
chr2R	5745150	5745581	Filter_SAM_or_BAM__output_SAM_or_BAM_on_data_207__bam_peak_2139	628	.	4.25041	65.6981	62.8075	196	Distal Intergenic	2	5754517	5756052	1536	1	NM_136338	-8936	l(2)09851	l(2)09851
chr2L	21558202	21558416	Filter_SAM_or_BAM__output_SAM_or_BAM_on_data_207__bam_peak_2034	18	.	1.62646	3.27075	1.84469	159	Distal Intergenic	1	21573389	21577103	3715	1	NM_136267	-14973	Lamp1	Lamp1
chr2L	21559769	21559987	Filter_SAM_or_BAM__output_SAM_or_BAM_on_data_207__bam_peak_2035	67	.	2.0552	8.37153	6.72861	139	Distal Intergenic	1	21573389	21577103	3715	1	NM_136267	-13402	Lamp1	Lamp1
chr2L	20222890	20223604	Filter_SAM_or_BAM__output_SAM_or_BAM_on_data_207__bam_peak_1902	240	.	2.75943	26.1649	24.0707	203	Distal Intergenic	1	20248039	20248872	834	1	NR_124392	-24435	lncRNA:CR40341	lncRNA:CR40341
chrX	52775	52995	Filter_SAM_or_BAM__output_SAM_or_BAM_on_data_207__bam_peak_9593	60	.	1.49127	7.61925	6.00227	174	Distal Intergenic	6	122493	122706	214	1	NR_003723	-69498	lncRNA:CR40469	lncRNA:CR40469
chrX	53706	54135	Filter_SAM_or_BAM__output_SAM_or_BAM_on_data_207__bam_peak_9594	89	.	1.63698	10.6734	8.95755	297	Distal Intergenic	6	122493	122706	214	1	NR_003723	-68358	lncRNA:CR40469	lncRNA:CR40469
chr2R	18372488	18372874	Filter_SAM_or_BAM__output_SAM_or_BAM_on_data_207__bam_peak_3625	337	.	3.2279	36.0053	33.7114	192	Distal Intergenic	2	18377487	18378196	710	1	NR_124617	-4613	lncRNA:CR42736	lncRNA:CR42736
chr3R	30752030	30752303	Filter_SAM_or_BAM__output_SAM_or_BAM_on_data_207__bam_peak_9376	321	.	3.27479	34.3645	32.1034	168	Distal Intergenic	4	30746685	30747172	488	2	NR_048515	-4859	lncRNA:CR43238	lncRNA:CR43238
chr3R	8190813	8191196	Filter_SAM_or_BAM__output_SAM_or_BAM_on_data_207__bam_peak_7090	1268	.	12.3481	131.26	126.814	192	Distal Intergenic	4	8197320	8197711	392	2	NR_048343	6515	lncRNA:CR43302	lncRNA:CR43302
chr2R	22287252	22287622	Filter_SAM_or_BAM__output_SAM_or_BAM_on_data_207__bam_peak_4018	469	.	3.69884	49.5622	46.9982	248	Distal Intergenic	2	22291717	22292395	679	1	NR_048188	-4095	lncRNA:CR43422	lncRNA:CR43422
chr3R	20683582	20683910	Filter_SAM_or_BAM__output_SAM_or_BAM_on_data_207__bam_peak_8329	135	.	3.63584	15.3637	13.5187	169	Distal Intergenic	4	20678183	20679079	897	1	NR_048437	5400	lncRNA:CR43452	lncRNA:CR43452
chr2L	16223739	16224146	Filter_SAM_or_BAM__output_SAM_or_BAM_on_data_207__bam_peak_1557	557	.	4.43359	58.4986	55.7591	211	Distal Intergenic	1	16216239	16217044	806	2	NR_073790	-6696	lncRNA:CR43840	lncRNA:CR43840
chr4	431806	432233	Filter_SAM_or_BAM__output_SAM_or_BAM_on_data_207__bam_peak_9528	872	.	5.81406	90.6615	87.2035	184	Distal Intergenic	5	427331	431769	4439	1	NR_073617	4476	lncRNA:CR44024	lncRNA:CR44024
chr2L	13085185	13085499	Filter_SAM_or_BAM__output_SAM_or_BAM_on_data_207__bam_peak_1340	505	.	3.77546	53.1475	50.5147	311	Distal Intergenic	1	13089803	13090559	757	1	NR_073767	-4304	lncRNA:CR44197	lncRNA:CR44197
chr2L	14251863	14252123	Filter_SAM_or_BAM__output_SAM_or_BAM_on_data_207__bam_peak_1458	245	.	2.92578	26.6741	24.5694	86	Distal Intergenic	1	14241144	14241732	589	1	NR_073771	10720	lncRNA:CR44216	lncRNA:CR44216
chr2L	3534193	3534629	Filter_SAM_or_BAM__output_SAM_or_BAM_on_data_207__bam_peak_384	967	.	6.94634	100.472	96.7799	417	Distal Intergenic	1	3537844	3538333	490	1	NR_124052	-3215	lncRNA:CR44308	lncRNA:CR44308
chr3L	8688586	8689032	Filter_SAM_or_BAM__output_SAM_or_BAM_on_data_207__bam_peak_5210	417	.	4.30019	44.2484	41.7902	154	Distal Intergenic	3	8692703	8693191	489	1	NR_124833	-3671	lncRNA:CR44526	lncRNA:CR44526
chr3L	8700297	8700517	Filter_SAM_or_BAM__output_SAM_or_BAM_on_data_207__bam_peak_5214	148	.	3.19322	16.7808	14.8997	59	Distal Intergenic	3	8692703	8693191	489	1	NR_124833	7595	lncRNA:CR44526	lncRNA:CR44526
chr3L	8704997	8705263	Filter_SAM_or_BAM__output_SAM_or_BAM_on_data_207__bam_peak_5215	277	.	3.92838	29.9051	27.7336	153	Distal Intergenic	3	8692703	8693191	489	1	NR_124833	12295	lncRNA:CR44526	lncRNA:CR44526
chr3L	816600	816833	Filter_SAM_or_BAM__output_SAM_or_BAM_on_data_207__bam_peak_4439	42	.	1.91126	5.78289	4.23547	121	Distal Intergenic	3	813300	814487	1188	1	NR_124747	3301	lncRNA:CR44537	lncRNA:CR44537
chr2L	1632822	1633045	Filter_SAM_or_BAM__output_SAM_or_BAM_on_data_207__bam_peak_180	72	.	2.48062	8.90112	7.24014	60	Distal Intergenic	1	1618637	1626021	7385	2	NR_124020	-6802	lncRNA:CR44603	lncRNA:CR44603
chr2R	22678010	22678200	Filter_SAM_or_BAM__output_SAM_or_BAM_on_data_207__bam_peak_4056	95	.	2.7681	11.291	9.55724	95	Distal Intergenic	2	22673195	22673695	501	2	NR_124702	-4316	lncRNA:CR44761	lncRNA:CR44761
chr2R	22678312	22678870	Filter_SAM_or_BAM__output_SAM_or_BAM_on_data_207__bam_peak_4057	914	.	4.88746	94.9775	91.4178	363	Distal Intergenic	2	22673195	22673695	501	2	NR_124702	-4618	lncRNA:CR44761	lncRNA:CR44761
chr2R	22680776	22681128	Filter_SAM_or_BAM__output_SAM_or_BAM_on_data_207__bam_peak_4058	722	.	4.48909	75.3681	72.2681	229	Distal Intergenic	2	22673195	22673695	501	2	NR_124702	-7082	lncRNA:CR44761	lncRNA:CR44761
chr2L	12837128	12837372	Filter_SAM_or_BAM__output_SAM_or_BAM_on_data_207__bam_peak_1319	700	.	6.2027	73.129	70.0786	152	Distal Intergenic	1	12840895	12841323	429	1	NR_124225	-3523	lncRNA:CR44970	lncRNA:CR44970
chr3L	10837957	10838770	Filter_SAM_or_BAM__output_SAM_or_BAM_on_data_207__bam_peak_5440	924	.	6.52963	96.0379	92.4535	974	Distal Intergenic	3	10850070	10850690	621	2	NR_124862	11920	lncRNA:CR45169	lncRNA:CR45169
chr3L	10842055	10842350	Filter_SAM_or_BAM__output_SAM_or_BAM_on_data_207__bam_peak_5441	475	.	5.47691	50.151	47.5761	154	Distal Intergenic	3	10850070	10850690	621	2	NR_124862	8340	lncRNA:CR45169	lncRNA:CR45169
chr2R	20161415	20161695	Filter_SAM_or_BAM__output_SAM_or_BAM_on_data_207__bam_peak_3819	236	.	3.71568	25.7082	23.624	163	Distal Intergenic	2	20150683	20150945	263	1	NR_124648	10733	lncRNA:CR45229	lncRNA:CR45229
chrX	21174985	21175253	Filter_SAM_or_BAM__output_SAM_or_BAM_on_data_207__bam_peak_11440	251	.	3.41325	27.221	25.1048	145	Distal Intergenic	6	21187979	21188759	781	1	NR_123975	-12726	lncRNA:CR45506	lncRNA:CR45506
chr3L	18968654	18968881	Filter_SAM_or_BAM__output_SAM_or_BAM_on_data_207__bam_peak_6285	191	.	3.60391	21.0907	19.1083	183	Distal Intergenic	3	18979368	18979590	223	1	NR_124995	-10487	lncRNA:CR45689	lncRNA:CR45689
chr2R	6418853	6419140	Filter_SAM_or_BAM__output_SAM_or_BAM_on_data_207__bam_peak_2193	272	.	4.17337	29.3945	27.2333	162	Distal Intergenic	2	6501032	6501772	741	2	NR_133106	82632	lncRNA:CR46075	lncRNA:CR46075
chr2R	6422742	6422948	Filter_SAM_or_BAM__output_SAM_or_BAM_on_data_207__bam_peak_2195	106	.	3.36884	12.398	10.6319	182	Distal Intergenic	2	6501032	6501772	741	2	NR_133106	78824	lncRNA:CR46075	lncRNA:CR46075
chr2L	4660920	4661231	Filter_SAM_or_BAM__output_SAM_or_BAM_on_data_207__bam_peak_482	354	.	3.83484	37.795	35.4651	227	Distal Intergenic	1	4655478	4656209	732	2	NR_156780	-4712	lncRNA:TS6	lncRNA:TS6
chr2L	22282558	22282904	Filter_SAM_or_BAM__output_SAM_or_BAM_on_data_207__bam_peak_2075	47	.	2.49001	6.29828	4.72979	178	Distal Intergenic	1	22308755	22368796	60042	1	NM_001259203	-25851	Marf1	Marf1
chr2R	13316670	13316985	Filter_SAM_or_BAM__output_SAM_or_BAM_on_data_207__bam_peak_3052	185	.	4.3209	20.5029	18.5336	181	Distal Intergenic	2	13329402	13329501	100	2	NR_048100	12516	mir-184	mir-184
chr4	406896	407165	Filter_SAM_or_BAM__output_SAM_or_BAM_on_data_207__bam_peak_9524	153	.	3.14462	17.2472	15.3542	145	Distal Intergenic	5	400703	400765	63	2	NR_144673	-6132	mir-9385	mir-9385
chr3L	6994672	6995004	Filter_SAM_or_BAM__output_SAM_or_BAM_on_data_207__bam_peak_5031	626	.	7.80023	65.557	62.6694	141	Distal Intergenic	3	6998843	7052555	53713	1	NM_001169885	-3839	Mp	Mp
chr3R	25512771	25513058	Filter_SAM_or_BAM__output_SAM_or_BAM_on_data_207__bam_peak_8903	657	.	5.62484	68.7213	65.7657	157	Distal Intergenic	4	25516118	25601136	85019	1	NM_001260374	-3060	msi	msi
chr2L	21397351	21397591	Filter_SAM_or_BAM__output_SAM_or_BAM_on_data_207__bam_peak_2031	115	.	2.33847	13.3093	11.5184	32	Distal Intergenic	1	21380133	21393319	13187	1	NM_165379	17219	nrv3	nrv3
chrX	8624800	8625320	Filter_SAM_or_BAM__output_SAM_or_BAM_on_data_207__bam_peak_10403	747	.	9.22769	77.9423	74.7835	192	Distal Intergenic	6	8630159	8643176	13018	2	NM_001272417	17856	oc	oc
chr2R	19776443	19776749	Filter_SAM_or_BAM__output_SAM_or_BAM_on_data_207__bam_peak_3798	419	.	5.24206	44.4574	41.9948	164	Distal Intergenic	2	19769461	19771233	1773	2	NM_079072	-5211	Or56a	Or56a
chr3L	8660217	8660696	Filter_SAM_or_BAM__output_SAM_or_BAM_on_data_207__bam_peak_5200	822	.	6.77703	85.5905	82.2541	259	Distal Intergenic	3	8649471	8651011	1541	1	NM_001144442	10747	Pex7	Pex7
chr2R	16919932	16920332	Filter_SAM_or_BAM__output_SAM_or_BAM_on_data_207__bam_peak_3460	417	.	3.43521	44.1966	41.7395	469	Distal Intergenic	2	16924655	16945126	20472	1	NM_001274106	-4323	Pkc53E	Pkc53E
chr2R	6267075	6267605	Filter_SAM_or_BAM__output_SAM_or_BAM_on_data_207__bam_peak_2191	458	.	3.06264	48.4023	45.8613	268	Distal Intergenic	2	6245512	6255266	9755	1	NM_165472	21564	Pld	Pld
chr3L	6904126	6904487	Filter_SAM_or_BAM__output_SAM_or_BAM_on_data_207__bam_peak_5017	226	.	4.76032	24.674	22.6121	166	Distal Intergenic	3	6911999	6913964	1966	2	NM_168181	9477	Prat2	Prat2
chr2R	10553881	10554254	Filter_SAM_or_BAM__output_SAM_or_BAM_on_data_207__bam_peak_2707	212	.	3.32951	23.2601	21.2286	179	Distal Intergenic	2	10557888	10616248	58361	1	NM_078962	-3634	psq	psq
chr2R	8645157	8645435	Filter_SAM_or_BAM__output_SAM_or_BAM_on_data_207__bam_peak_2456	187	.	3.72495	20.6761	18.7027	147	Distal Intergenic	2	8649649	8665223	15575	1	NM_078937	-4214	ptc	ptc
chrX	1399662	1400018	Filter_SAM_or_BAM__output_SAM_or_BAM_on_data_207__bam_peak_9693	261	.	5.12649	28.3319	26.1927	171	Distal Intergenic	6	1393054	1397337	4284	1	NM_130554	6609	Rilpl	Rilpl
chr3L	18402189	18402618	Filter_SAM_or_BAM__output_SAM_or_BAM_on_data_207__bam_peak_6212	567	.	5.00691	59.506	56.7454	1290	Distal Intergenic	3	18397535	18398435	901	2	NM_079414	-3755	rpr	rpr
chr3L	18402880	18403180	Filter_SAM_or_BAM__output_SAM_or_BAM_on_data_207__bam_peak_6212	567	.	5.00691	59.506	56.7454	1290	Distal Intergenic	3	18397535	18398435	901	2	NM_079414	-4446	rpr	rpr
chrX	13421055	13421443	Filter_SAM_or_BAM__output_SAM_or_BAM_on_data_207__bam_peak_10832	125	.	2.35332	14.3364	12.5179	192	Distal Intergenic	6	13413242	13421024	7783	1	NM_132660	7814	Set2	Set2
chr3L	14607715	14608029	Filter_SAM_or_BAM__output_SAM_or_BAM_on_data_207__bam_peak_5767	512	.	3.91592	53.8931	51.245	158	Distal Intergenic	3	14614458	14622205	7748	1	NM_001274914	-6429	shd	shd
chr3L	14609424	14609728	Filter_SAM_or_BAM__output_SAM_or_BAM_on_data_207__bam_peak_5768	84	.	2.58568	10.1349	8.43491	305	Distal Intergenic	3	14614458	14622205	7748	1	NM_001274914	-4730	shd	shd
chr3L	5288044	5288240	Filter_SAM_or_BAM__output_SAM_or_BAM_on_data_207__bam_peak_4919	258	.	4.68952	27.9503	25.8192	164	Distal Intergenic	3	5160686	5277944	117259	2	NM_168111	-10101	shep	shep
chr3R	13078246	13078765	Filter_SAM_or_BAM__output_SAM_or_BAM_on_data_207__bam_peak_7606	597	.	5.41045	62.5248	59.702	167	Distal Intergenic	4	13072399	13078124	5726	1	NM_079616	5848	sim	sim
chr3R	20332748	20333044	Filter_SAM_or_BAM__output_SAM_or_BAM_on_data_207__bam_peak_8306	71	.	2.20281	8.80811	7.14966	124	Distal Intergenic	4	20328465	20330915	2451	1	NM_001300493	4284	Sirt2	Sirt2
chr2L	22574241	22574762	Filter_SAM_or_BAM__output_SAM_or_BAM_on_data_207__bam_peak_2077	321	.	3.16776	34.4567	32.1937	223	Distal Intergenic	1	22579072	22585843	6772	1	NM_001042934	-4310	Slmap	Slmap
chrX	16244778	16245116	Filter_SAM_or_BAM__output_SAM_or_BAM_on_data_207__bam_peak_11051	470	.	5.74771	49.566	47.002	196	Distal Intergenic	6	16254008	16254117	110	2	NR_002129	9001	snRNA:U5:14B	snRNA:U5:14B
chr3L	8709097	8709245	Filter_SAM_or_BAM__output_SAM_or_BAM_on_data_207__bam_peak_5216	97	.	2.59446	11.5412	9.79993	70	Distal Intergenic	3	8718949	8720225	1277	2	NM_001274667	10980	SrpRbeta	SrpRbeta
chr2R	13009118	13009662	Filter_SAM_or_BAM__output_SAM_or_BAM_on_data_207__bam_peak_3024	882	.	7.15443	91.7415	88.2592	259	Distal Intergenic	2	12997123	13007802	10680	1	NM_079002	11996	Su(z)2	Su(z)2
chr2R	13014621	13015135	Filter_SAM_or_BAM__output_SAM_or_BAM_on_data_207__bam_peak_3025	333	.	3.41154	35.6186	33.332	742	Distal Intergenic	2	12997123	13007802	10680	1	NM_079002	17499	Su(z)2	Su(z)2
chr2R	13015601	13016115	Filter_SAM_or_BAM__output_SAM_or_BAM_on_data_207__bam_peak_3026	1255	.	9.10408	129.961	125.547	274	Distal Intergenic	2	12997123	13007802	10680	1	NM_079002	18479	Su(z)2	Su(z)2
chr3R	30844827	30845085	Filter_SAM_or_BAM__output_SAM_or_BAM_on_data_207__bam_peak_9395	373	.	4.33328	39.7512	37.3822	152	Distal Intergenic	4	30852315	30854400	2086	1	NM_079857	-7230	tll	tll
chr2L	9089609	9090233	Filter_SAM_or_BAM__output_SAM_or_BAM_on_data_207__bam_peak_964	175	.	2.68384	19.4799	17.5343	160	Distal Intergenic	1	9084107	9089440	5334	1	NM_078795	5503	Toll-4	Toll-4
chr3L	15229091	15229528	Filter_SAM_or_BAM__output_SAM_or_BAM_on_data_207__bam_peak_5831	521	.	4.02295	54.7711	52.1065	296	Distal Intergenic	3	15235619	15242832	7214	1	NM_080018	-6091	Tollo	Tollo
chr3L	15230356	15230456	Filter_SAM_or_BAM__output_SAM_or_BAM_on_data_207__bam_peak_5832	990	.	5.56714	102.813	99.0631	897	Distal Intergenic	3	15235619	15242832	7214	1	NM_080018	-5163	Tollo	Tollo
chr3L	15231881	15232372	Filter_SAM_or_BAM__output_SAM_or_BAM_on_data_207__bam_peak_5832	990	.	5.56714	102.813	99.0631	897	Distal Intergenic	3	15235619	15242832	7214	1	NM_080018	-3247	Tollo	Tollo
chrX	5563739	5563795	Filter_SAM_or_BAM__output_SAM_or_BAM_on_data_207__bam_peak_10080	275	.	3.76498	29.7388	27.5708	157	Distal Intergenic	6	5528927	5560183	31257	2	NM_001297968	-3557	Vsx2	Vsx2
chr2L	14252306	14252929	Filter_SAM_or_BAM__output_SAM_or_BAM_on_data_207__bam_peak_1459	271	.	3.00997	29.3481	27.1885	152	Distal Intergenic	1	14263027	14326280	63254	1	NM_057442	-10098	wb	wb
chr2L	7281411	7281855	Filter_SAM_or_BAM__output_SAM_or_BAM_on_data_207__bam_peak_743	1006	.	5.94361	104.424	100.634	284	Distal Intergenic	1	7255848	7277171	21324	2	NM_001273258	-4241	Wnt4	Wnt4
chr3R	7508422	7508746	Filter_SAM_or_BAM__output_SAM_or_BAM_on_data_207__bam_peak_7033	359	.	3.45702	38.3221	35.9823	140	Downstream (<1kb)	4	7494097	7505098	11002	2	NM_079534	-3325	alpha-Est9	alpha-Est9
chr3L	19483037	19483391	Filter_SAM_or_BAM__output_SAM_or_BAM_on_data_207__bam_peak_6328	390	.	3.34135	41.4949	39.0913	150	Downstream (<1kb)	3	19483826	19486498	2673	2	NM_140859	3107	brv1	brv1
chr3L	5966895	5967227	Filter_SAM_or_BAM__output_SAM_or_BAM_on_data_207__bam_peak_4973	820	.	5.01255	85.3659	82.0368	168	Downstream (<1kb)	3	5967545	5976007	8463	2	NM_001274529	8780	CG10479	CG10479
chr3R	19792747	19793344	Filter_SAM_or_BAM__output_SAM_or_BAM_on_data_207__bam_peak_8250	312	.	4.02012	33.5038	31.2598	399	Downstream (<1kb)	4	19783522	19785519	1998	1	NM_142575	9226	CG11453	CG11453
chr2R	7317551	7317908	Filter_SAM_or_BAM__output_SAM_or_BAM_on_data_207__bam_peak_2285	363	.	3.27464	38.6568	36.31	170	Downstream (<1kb)	2	7311395	7313495	2101	1	NM_001299228	6157	CG12164	CG12164
chr3L	18167131	18167482	Filter_SAM_or_BAM__output_SAM_or_BAM_on_data_207__bam_peak_6198	414	.	4.40532	43.8656	41.4151	176	Downstream (<1kb)	3	18154897	18162522	7626	2	NM_140776	-4610	CG13699	CG13699
chr3R	15888967	15889184	Filter_SAM_or_BAM__output_SAM_or_BAM_on_data_207__bam_peak_7884	49	.	1.76834	6.49414	4.91771	124	Downstream (<1kb)	4	15889194	15896078	6885	2	NM_142250	6894	CG14877	CG14877
chrX	4956109	4956536	Filter_SAM_or_BAM__output_SAM_or_BAM_on_data_207__bam_peak_10033	353	.	4.6648	37.681	35.3541	239	Downstream (<1kb)	6	4959929	4961128	1200	2	NM_131972	4592	CG15468	CG15468
chr2L	15643882	15644102	Filter_SAM_or_BAM__output_SAM_or_BAM_on_data_207__bam_peak_1530	101	.	2.72847	11.8609	10.1102	51	Downstream (<1kb)	1	15630083	15634987	4905	1	NM_001299032	13800	CG18480	CG18480
chr3R	7779629	7780189	Filter_SAM_or_BAM__output_SAM_or_BAM_on_data_207__bam_peak_7044	933	.	4.41312	96.9214	93.3161	239	Downstream (<1kb)	4	7780884	7783446	2563	2	NM_144393	3257	CG18747	CG18747
chr2R	9541599	9541883	Filter_SAM_or_BAM__output_SAM_or_BAM_on_data_207__bam_peak_2563	450	.	4.456	47.5354	45.0119	168	Downstream (<1kb)	2	9541947	9546958	5012	2	NM_001273899	5075	CG1888	CG1888
chr3R	17231748	17232058	Filter_SAM_or_BAM__output_SAM_or_BAM_on_data_207__bam_peak_8028	186	.	3.97263	20.6308	18.6589	152	Downstream (<1kb)	4	17217116	17223074	5959	2	NM_169752	-8675	CG31262	CG31262
chr3R	6149620	6150063	Filter_SAM_or_BAM__output_SAM_or_BAM_on_data_207__bam_peak_6919	661	.	6.46911	69.0744	66.1116	188	Downstream (<1kb)	4	6150116	6157235	7120	2	NM_169127	7172	CG31559	CG31559
chr2L	18666004	18666300	Filter_SAM_or_BAM__output_SAM_or_BAM_on_data_207__bam_peak_1757	203	.	1.98281	22.3172	20.3068	128	Downstream (<1kb)	1	18666892	18670043	3152	2	NM_165257	3743	CG43338	CG43338
chr3R	12121094	12121131	Filter_SAM_or_BAM__output_SAM_or_BAM_on_data_207__bam_peak_7513	49	.	1.75289	6.57689	4.99773	151	Downstream (<1kb)	4	12121583	12128201	6619	2	NM_001260141	7070	CG4702	CG4702
chr3R	18798716	18799092	Filter_SAM_or_BAM__output_SAM_or_BAM_on_data_207__bam_peak_8173	921	.	5.76902	95.6806	92.1037	192	Downstream (<1kb)	4	18759236	18795169	35934	2	NM_142496	-3548	CG7720	CG7720
chrX	17455898	17456160	Filter_SAM_or_BAM__output_SAM_or_BAM_on_data_207__bam_peak_11179	352	.	5.32022	37.5841	35.2586	103	Downstream (<1kb)	6	17448990	17452543	3554	2	NM_132989	-3356	CG8568	CG8568
chr2R	25182946	25183345	Filter_SAM_or_BAM__output_SAM_or_BAM_on_data_207__bam_peak_4315	82	.	1.85884	9.93971	8.24619	66	Downstream (<1kb)	2	25183628	25188808	5181	2	NM_001043106	5463	CG9380	CG9380
chr3L	1850553	1850884	Filter_SAM_or_BAM__output_SAM_or_BAM_on_data_207__bam_peak_4560	570	.	3.89899	59.8063	57.0401	173	Downstream (<1kb)	3	1850915	1855309	4395	2	NM_001274365	4425	CNMa	CNMa
chr2L	833280	833571	Filter_SAM_or_BAM__output_SAM_or_BAM_on_data_207__bam_peak_120	340	.	3.29326	36.3604	34.059	117	Downstream (<1kb)	1	825969	833241	7273	1	NM_164390	7312	dock	dock
chr2R	8992339	8992600	Filter_SAM_or_BAM__output_SAM_or_BAM_on_data_207__bam_peak_2493	221	.	2.65424	24.2352	22.1825	116	Downstream (<1kb)	2	8969346	8985900	16555	2	NM_136591	-6440	flz	flz
chr3R	6388570	6388977	Filter_SAM_or_BAM__output_SAM_or_BAM_on_data_207__bam_peak_6937	228	.	2.85998	24.8839	22.8172	262	Downstream (<1kb)	4	6384335	6388304	3970	1	NM_169140	4236	godzilla	godzilla
chrX	1523362	1523533	Filter_SAM_or_BAM__output_SAM_or_BAM_on_data_207__bam_peak_9704	226	.	3.78465	24.7187	22.6551	139	Downstream (<1kb)	6	1513070	1517615	4546	1	NM_130570	10293	inc	inc
chr2L	7641710	7641935	Filter_SAM_or_BAM__output_SAM_or_BAM_on_data_207__bam_peak_788	158	.	2.70421	17.8003	15.8944	159	Downstream (<1kb)	1	7636951	7637324	374	1	NR_124135	4760	lncRNA:CR44800	lncRNA:CR44800
chr3L	3400816	3401149	Filter_SAM_or_BAM__output_SAM_or_BAM_on_data_207__bam_peak_4743	917	.	6.74304	95.3613	91.7918	183	Downstream (<1kb)	3	3394088	3394607	520	1	NR_124771	6729	lncRNA:CR45737	lncRNA:CR45737
chr2R	18553649	18554108	Filter_SAM_or_BAM__output_SAM_or_BAM_on_data_207__bam_peak_3654	686	.	5.17899	71.6889	68.6692	159	Downstream (<1kb)	2	18541144	18542454	1311	1	NR_133131	12506	lncRNA:CR46271	lncRNA:CR46271
chr3R	14391260	14391597	Filter_SAM_or_BAM__output_SAM_or_BAM_on_data_207__bam_peak_7728	451	.	4.91364	47.6712	45.1448	155	Downstream (<1kb)	4	14396399	14396501	103	2	NR_048389	4904	mir-2281	mir-2281
chr2R	9686975	9687324	Filter_SAM_or_BAM__output_SAM_or_BAM_on_data_207__bam_peak_2585	227	.	3.31076	24.8352	22.7696	190	Downstream (<1kb)	2	9611139	9683858	72720	2	NM_206066	-3118	Mmp2	Mmp2
chr3L	21483834	21484338	Filter_SAM_or_BAM__output_SAM_or_BAM_on_data_207__bam_peak_6564	1418	.	6.15051	146.725	141.841	274	Downstream (<1kb)	3	21484891	21490586	5696	2	NM_001275231	6248	Neu2	Neu2
chr3L	14111395	14111769	Filter_SAM_or_BAM__output_SAM_or_BAM_on_data_207__bam_peak_5726	446	.	4.57093	47.2112	44.6939	180	Downstream (<1kb)	3	14103481	14108118	4638	2	NM_140437	-3278	Sox21a	Sox21a
chr2L	16507669	16507973	Filter_SAM_or_BAM__output_SAM_or_BAM_on_data_207__bam_peak_1605	153	.	2.34305	17.2817	15.3879	140	Downstream (<1kb)	1	16501918	16507350	5433	1	NM_001273571	5752	Tpr2	Tpr2
chrX	18239328	18239684	Filter_SAM_or_BAM__output_SAM_or_BAM_on_data_207__bam_peak_11248	261	.	5.12649	28.3319	26.1927	129	Downstream (<1kb)	6	18240654	18243284	2631	2	NM_001370039	3600	upd2	upd2
chr3R	16309483	16309943	Filter_SAM_or_BAM__output_SAM_or_BAM_on_data_207__bam_peak_7953	410	.	3.6142	43.5005	41.0571	987	Downstream (<1kb)	4	16305758	16308700	2943	1	NM_080499	3726	Zip89B	Zip89B
chr3R	7485006	7485227	Filter_SAM_or_BAM__output_SAM_or_BAM_on_data_207__bam_peak_7025	260	.	3.71242	28.2226	26.0859	116	Downstream (1-2kb)	4	7486583	7488751	2169	2	NM_001260034	3524	alpha-Est10	alpha-Est10
chr2R	13043187	13043626	Filter_SAM_or_BAM__output_SAM_or_BAM_on_data_207__bam_peak_3033	331	.	3.38147	35.4295	33.1467	241	Downstream (1-2kb)	2	13044695	13047256	2562	2	NM_001299441	3630	CG13323	CG13323
chr3R	29291291	29291803	Filter_SAM_or_BAM__output_SAM_or_BAM_on_data_207__bam_peak_9230	987	.	4.41346	102.501	98.7603	1104	Downstream (1-2kb)	4	29293743	29297180	3438	2	NM_001276138	5377	CG14506	CG14506
chr3L	17657977	17658764	Filter_SAM_or_BAM__output_SAM_or_BAM_on_data_207__bam_peak_6120	354	.	3.10217	37.814	35.4837	586	Downstream (1-2kb)	3	17654617	17655645	1029	1	NM_140743	3361	CG7484	CG7484
chrX	12754962	12755276	Filter_SAM_or_BAM__output_SAM_or_BAM_on_data_207__bam_peak_10757	1870	.	9.74328	193.548	187.066	330	Downstream (1-2kb)	6	12751867	12754571	2705	1	NR_123887	3096	lncRNA:CR44619	lncRNA:CR44619
chr2L	1006435	1006961	Filter_SAM_or_BAM__output_SAM_or_BAM_on_data_207__bam_peak_140	609	.	4.63174	63.8508	60.9995	203	Downstream (1-2kb)	1	987807	991300	3494	2	NR_144656	-15136	lncRNA:CR44801	lncRNA:CR44801
chrX	19325804	19326011	Filter_SAM_or_BAM__output_SAM_or_BAM_on_data_207__bam_peak_11345	89	.	3.05854	10.7103	8.9931	42	Downstream (1-2kb)	6	19311025	19322106	11082	2	NM_133150	-3699	out	out
chr3R	13360180	13360394	Filter_SAM_or_BAM__output_SAM_or_BAM_on_data_207__bam_peak_7618	203	.	3.40766	22.3866	20.3747	148	Downstream (1-2kb)	4	13361816	13364588	2773	2	NM_001202286	4194	poly	poly
chr2L	17784613	17784938	Filter_SAM_or_BAM__output_SAM_or_BAM_on_data_207__bam_peak_1701	553	.	5.20236	58.072	55.3412	169	Downstream (2-3kb)	1	17647053	17778340	131288	2	NM_165227	-6274	CadN	CadN
chr2R	13042036	13042520	Filter_SAM_or_BAM__output_SAM_or_BAM_on_data_207__bam_peak_3031	625	.	5.85023	65.4507	62.5652	382	Downstream (2-3kb)	2	13044695	13047256	2562	2	NM_001299441	4736	CG13323	CG13323
chr3R	7090241	7090318	Filter_SAM_or_BAM__output_SAM_or_BAM_on_data_207__bam_peak_6993	155	.	2.69969	17.4325	15.5352	476	Downstream (2-3kb)	4	7092347	7093707	1361	2	NR_073988	3389	lncRNA:CR43685	lncRNA:CR43685
chr2L	14184174	14184480	Filter_SAM_or_BAM__output_SAM_or_BAM_on_data_207__bam_peak_1444	102	.	2.65106	11.9549	10.2016	178	Exon (NM_001038817/Dyrk2, exon 1 of 11)	1	14163508	14180686	17179	2	NM_176037	-3489	CG43333	CG43333
chr2L	8185037	8185331	Filter_SAM_or_BAM__output_SAM_or_BAM_on_data_207__bam_peak_857	239	.	2.94735	26.0516	23.9603	123	Exon (NM_001042881/Piezo, exon 22 of 30)	1	8190297	8190781	485	2	NM_001042882	5450	CG34134	CG34134
chr2R	20884320	20884898	Filter_SAM_or_BAM__output_SAM_or_BAM_on_data_207__bam_peak_3861	377	.	4.40395	40.1364	37.7599	415	Exon (NM_001043098/otp, exon 1 of 6)	2	20879930	20882663	2734	1	NM_137679	4391	Cib2	Cib2
chr3L	2122384	2122638	Filter_SAM_or_BAM__output_SAM_or_BAM_on_data_207__bam_peak_4585	241	.	4.36371	26.2472	24.1515	158	Exon (NM_001043112/zormin, exon 1 of 18)	3	2118498	2119567	1070	1	NR_133160	3887	asRNA:CR45802	asRNA:CR45802
chr3L	16930523	16930853	Filter_SAM_or_BAM__output_SAM_or_BAM_on_data_207__bam_peak_6040	408	.	5.01686	43.3393	40.8989	186	Exon (NM_001104154/CG11905, exon 1 of 4)	3	16924338	16927434	3097	2	NM_140678	-3090	CG13023	CG13023
chr3R	6392681	6392749	Filter_SAM_or_BAM__output_SAM_or_BAM_on_data_207__bam_peak_6938	114	.	2.06129	13.2336	11.445	143	Exon (NM_001144543/Dmtn, exon 8 of 10)	4	6384335	6388304	3970	1	NM_169140	8347	godzilla	godzilla
chr3R	21580151	21580438	Filter_SAM_or_BAM__output_SAM_or_BAM_on_data_207__bam_peak_8445	210	.	3.57127	23.035	21.0087	120	Exon (NM_001144623/InR, exon 10 of 12)	4	21570248	21590191	19944	2	NM_001144623	9753	InR	InR
chrX	17624462	17624884	Filter_SAM_or_BAM__output_SAM_or_BAM_on_data_207__bam_peak_11195	885	.	6.6937	92.0559	88.5657	348	Exon (NM_001144745/stas, exon 1 of 3)	6	17623221	17627895	4675	2	NM_132997	3011	stas	stas
chr2R	6089027	6089253	Filter_SAM_or_BAM__output_SAM_or_BAM_on_data_207__bam_peak_2163	227	.	3.01276	24.8212	22.7559	156	Exon (NM_001169590/EcR, exon 1 of 6)	2	6080828	6085625	4798	2	NM_165460	-3403	Ars2	Ars2
chr3L	18828443	18828662	Filter_SAM_or_BAM__output_SAM_or_BAM_on_data_207__bam_peak_6258	83	.	2.10873	10.0215	8.32513	51	Exon (NM_001169994/Indy, exon 1 of 9)	3	18822604	18828188	5585	1	NM_080483	5840	Cat	Cat
chr3L	4219310	4219648	Filter_SAM_or_BAM__output_SAM_or_BAM_on_data_207__bam_peak_4830	799	.	5.93866	83.2676	79.9869	142	Exon (NM_001202119/CG43367, exon 24 of 26)	3	4221704	4222734	1031	2	NR_048228	3086	asRNA:CR32252	asRNA:CR32252
chr2L	8355386	8355773	Filter_SAM_or_BAM__output_SAM_or_BAM_on_data_207__bam_peak_880	419	.	2.90981	44.4462	41.9842	124	Exon (NM_001259014/CG7627, exon 1 of 10)	1	8352187	8355172	2986	1	NM_164808	3200	Mur29B	Mur29B
chr3L	14513169	14513633	Filter_SAM_or_BAM__output_SAM_or_BAM_on_data_207__bam_peak_5758	256	.	3.27819	27.7404	25.6136	293	Exon (NM_001259826/bbg, exon 7 of 9)	3	14412991	14510074	97084	2	NM_001144481	-3096	bbg	bbg
chr3R	12121239	12121607	Filter_SAM_or_BAM__output_SAM_or_BAM_on_data_207__bam_peak_7514	664	.	4.61226	69.4189	66.4475	185	Exon (NM_001260141/CG4702, exon 1 of 6)	4	12121583	12128201	6619	2	NM_001260141	6594	CG4702	CG4702
chrX	8757834	8758139	Filter_SAM_or_BAM__output_SAM_or_BAM_on_data_207__bam_peak_10414	369	.	6.15179	39.3576	36.9963	153	Exon (NM_001272429/Lim1, exon 1 of 5)	6	8756539	8785353	28815	2	NM_001272429	27214	Lim1	Lim1
chrX	12757067	12757391	Filter_SAM_or_BAM__output_SAM_or_BAM_on_data_207__bam_peak_10759	272	.	4.93336	29.3942	27.2332	171	Exon (NM_001272564/Paics, exon 1 of 5)	6	12757036	12760617	3582	2	NM_001272564	3226	Paics	Paics
chr2L	3748783	3749035	Filter_SAM_or_BAM__output_SAM_or_BAM_on_data_207__bam_peak_411	256	.	3.44428	27.7733	25.6456	94	Exon (NM_001273073/CG10019, exon 7 of 13)	1	3745394	3754617	9224	1	NM_134961	3390	CG10019	CG10019
chr2L	13513325	13513594	Filter_SAM_or_BAM__output_SAM_or_BAM_on_data_207__bam_peak_1386	410	.	4.46248	43.5278	41.084	86	Exon (NM_001273516/B4, exon 4 of 7)	1	13527841	13528537	697	1	NM_001032084	-14247	CG33640	CG33640
chr2L	22145681	22145869	Filter_SAM_or_BAM__output_SAM_or_BAM_on_data_207__bam_peak_2068	159	.	3.25656	17.8737	15.9655	157	Exon (NM_001273754/CG42748, exon 6 of 9)	1	22140121	22159611	19491	1	NM_136290	5561	CG42748	CG42748
chr2R	7688167	7688568	Filter_SAM_or_BAM__output_SAM_or_BAM_on_data_207__bam_peak_2337	1129	.	5.79144	117.029	112.938	188	Exon (NM_001273859/LRR, exon 21 of 22)	2	7677070	7681836	4767	2	NM_165549	-6332	LRR	LRR
chr2R	15762316	15762591	Filter_SAM_or_BAM__output_SAM_or_BAM_on_data_207__bam_peak_3313	199	.	3.19414	21.9917	19.9889	179	Exon (NM_001274081/Zasp52, exon 1 of 7)	2	15762565	15776062	13498	2	NM_001274081	13471	Zasp52	Zasp52
chr3L	9203051	9203350	Filter_SAM_or_BAM__output_SAM_or_BAM_on_data_207__bam_peak_5274	193	.	2.53935	21.3168	19.3289	182	Exon (NM_001274691/Slc45-1, exon 1 of 4)	3	9203065	9206613	3549	2	NM_001274691	3263	Slc45-1	Slc45-1
chr3R	9043630	9044119	Filter_SAM_or_BAM__output_SAM_or_BAM_on_data_207__bam_peak_7185	915	.	5.08343	95.132	91.5692	223	Exon (NM_001275469/Nmdmc, exon 2 of 3)	4	9044183	9047200	3018	2	NM_206465	3081	Rel	Rel
chr3R	9057016	9058266	Filter_SAM_or_BAM__output_SAM_or_BAM_on_data_207__bam_peak_7193	831	.	5.46672	86.5369	83.1782	672	Exon (NM_001275471/Kdm2, exon 3 of 6)	4	9053291	9063245	9955	1	NM_001275473	3726	Kdm2	Kdm2
chr3R	9214263	9214621	Filter_SAM_or_BAM__output_SAM_or_BAM_on_data_207__bam_peak_7202	650	.	4.66869	67.9927	65.0529	180	Exon (NM_001275474/pum, exon 7 of 13)	4	9067578	9226840	159263	2	NM_169260	12219	pum	pum
chr3R	13232781	13233110	Filter_SAM_or_BAM__output_SAM_or_BAM_on_data_207__bam_peak_7610	288	.	4.85632	31.0024	28.8087	181	Exon (NM_001275601/Ace, exon 2 of 10)	4	13219644	13220578	935	2	NM_169497	-12204	CG8476	CG8476
chr3R	16310241	16310602	Filter_SAM_or_BAM__output_SAM_or_BAM_on_data_207__bam_peak_7953	410	.	3.6142	43.5005	41.0571	987	Exon (NM_001275697/Sulf1, exon 1 of 11)	4	16305758	16308700	2943	1	NM_080499	4484	Zip89B	Zip89B
chr4	1113374	1113718	Filter_SAM_or_BAM__output_SAM_or_BAM_on_data_207__bam_peak_9576	910	.	5.44374	94.6102	91.0584	151	Exon (NM_001297793/Cals, exon 1 of 12)	5	1112874	1122965	10092	2	NM_001297793	9247	Cals	Cals
chrX	16458613	16458922	Filter_SAM_or_BAM__output_SAM_or_BAM_on_data_207__bam_peak_11087	446	.	4.57093	47.2112	44.6939	269	Exon (NM_001298403/para, exon 1 of 31)	6	16449152	16453615	4464	1	NM_001298402	9462	eIF4H1	eIF4H1
chrX	19326776	19327131	Filter_SAM_or_BAM__output_SAM_or_BAM_on_data_207__bam_peak_11346	550	.	5.31385	57.747	55.0226	185	Exon (NM_001298507/nAChRalpha7, exon 1 of 17)	6	19311025	19322106	11082	2	NM_133150	-4671	out	out
chr2L	16279006	16279317	Filter_SAM_or_BAM__output_SAM_or_BAM_on_data_207__bam_peak_1571	52	.	1.85662	6.88755	5.29623	187	Exon (NM_001299047/crp, exon 2 of 3)	1	16263556	16287730	24175	2	NM_001299047	8413	crp	crp
chr2L	17368495	17368844	Filter_SAM_or_BAM__output_SAM_or_BAM_on_data_207__bam_peak_1677	317	.	2.93038	34.0221	31.7676	177	Exon (NM_001299083/Lrch, exon 1 of 7)	1	17363496	17364351	856	1	NM_165211	5000	CG31804	CG31804
chr2L	18936198	18936515	Filter_SAM_or_BAM__output_SAM_or_BAM_on_data_207__bam_peak_1783	464	.	5.12925	48.9764	46.4241	172	Exon (NM_001299140/ssp3, exon 6 of 11)	1	18916347	18943960	27614	2	NM_001299140	7445	ssp3	ssp3
chr2R	8051900	8052108	Filter_SAM_or_BAM__output_SAM_or_BAM_on_data_207__bam_peak_2395	94	.	2.75538	11.2114	9.4798	64	Exon (NM_001299252/CG12769, exon 1 of 5)	2	8053829	8058551	4723	2	NM_136503	6443	CG12769	CG12769
chr2R	23652269	23652658	Filter_SAM_or_BAM__output_SAM_or_BAM_on_data_207__bam_peak_4130	200	.	2.37513	22.0068	20.0034	193	Exon (NM_001299844/retn, exon 10 of 12)	2	23657567	23679108	21542	1	NM_001169807	-4909	Pde8	Pde8
chr3R	13833591	13833870	Filter_SAM_or_BAM__output_SAM_or_BAM_on_data_207__bam_peak_7659	321	.	3.81777	34.4424	32.1796	123	Exon (NM_001300390/Nsf2, exon 1 of 4)	4	13833497	13837991	4495	2	NM_001300390	4121	Nsf2	Nsf2
chr2R	6235945	6236412	Filter_SAM_or_BAM__output_SAM_or_BAM_on_data_207__bam_peak_2187	808	.	7.74435	84.1347	80.8339	97	Exon (NM_078902/bin3, exon 3 of 7)	2	6242004	6255266	13263	1	NM_165469	-5592	Pld	Pld
chr3L	16470051	16470412	Filter_SAM_or_BAM__output_SAM_or_BAM_on_data_207__bam_peak_5966	450	.	3.35862	47.5607	45.0367	180	Exon (NM_079383/aos, exon 1 of 4)	3	16470386	16483650	13265	2	NM_079383	13238	aos	aos
chrX	10832408	10832754	Filter_SAM_or_BAM__output_SAM_or_BAM_on_data_207__bam_peak_10585	1140	.	10.4091	118.18	114.063	188	Exon (NM_079921/sbr, exon 1 of 10)	6	10833295	10837479	4185	2	NM_001369981	4725	sbr	sbr
chr3L	7813419	7813887	Filter_SAM_or_BAM__output_SAM_or_BAM_on_data_207__bam_peak_5093	520	.	5.08526	54.6707	52.0075	147	Exon (NM_080093/Pdp1, exon 1 of 6)	3	7777105	7809825	32721	2	NM_001259731	-3595	CG32369	CG32369
chr3L	7815597	7816058	Filter_SAM_or_BAM__output_SAM_or_BAM_on_data_207__bam_peak_5094	198	.	2.92101	21.8894	19.8885	268	Exon (NM_080093/Pdp1, exon 1 of 6)	3	7777105	7809825	32721	2	NM_001259731	-5773	CG32369	CG32369
chrX	3841294	3841783	Filter_SAM_or_BAM__output_SAM_or_BAM_on_data_207__bam_peak_9964	462	.	5.1908	48.804	46.255	148	Exon (NM_130722/ec, exon 3 of 6)	6	3845898	3857621	11724	1	NM_001103407	-4115	ec	ec
chr2L	7447767	7448025	Filter_SAM_or_BAM__output_SAM_or_BAM_on_data_207__bam_peak_768	188	.	3.11353	20.8221	18.8456	126	Exon (NM_135277/santa-maria, exon 4 of 4)	1	7445355	7451244	5890	2	NM_135277	3219	santa-maria	santa-maria
chr2R	8396531	8397023	Filter_SAM_or_BAM__output_SAM_or_BAM_on_data_207__bam_peak_2432	980	.	6.25336	101.722	98.0002	237	Exon (NM_136534/CG2121, exon 1 of 6)	2	8387370	8396280	8911	1	NM_136533	9162	pdm3	pdm3
chr3L	13860032	13860416	Filter_SAM_or_BAM__output_SAM_or_BAM_on_data_207__bam_peak_5694	501	.	3.78645	52.8155	50.1883	192	Exon (NM_140408/CG8745, exon 1 of 4)	3	13860027	13866905	6879	2	NM_140408	6489	CG8745	CG8745
chr3R	21020786	21021124	Filter_SAM_or_BAM__output_SAM_or_BAM_on_data_207__bam_peak_8368	104	.	2.30675	12.2526	10.4914	184	Exon (NM_143973/CG17278, exon 1 of 3)	4	21021044	21024163	3120	2	NM_143973	3039	CG17278	CG17278
chr2R	5677028	5677292	Filter_SAM_or_BAM__output_SAM_or_BAM_on_data_207__bam_peak_2128	227	.	3.08034	24.8447	22.7788	93	Exon (NM_165441/scaf, exon 1 of 7)	2	5671741	5672800	1060	1	NM_136335	5288	kune	kune
chr2R	8607960	8608357	Filter_SAM_or_BAM__output_SAM_or_BAM_on_data_207__bam_peak_2451	486	.	3.55742	51.279	48.6821	526	Exon (NM_165611/rgr, exon 2 of 5)	2	8611379	8614155	2777	2	NM_136552	5798	CG8642	CG8642
chr3L	11641987	11642218	Filter_SAM_or_BAM__output_SAM_or_BAM_on_data_207__bam_peak_5544	95	.	2.48631	11.2956	9.56131	147	Exon (NM_168468/CG32091, exon 6 of 7)	3	11642906	11646033	3128	2	NM_140231	3815	CG6071	CG6071
chr3R	10203581	10203878	Filter_SAM_or_BAM__output_SAM_or_BAM_on_data_207__bam_peak_7348	152	.	3.02477	17.0992	15.2102	115	Exon (NM_169336/Timp, exon 1 of 5)	4	10203875	10213007	9133	2	NM_169336	9129	Timp	Timp
chr3R	26253918	26254162	Filter_SAM_or_BAM__output_SAM_or_BAM_on_data_207__bam_peak_8975	198	.	2.51112	21.8789	19.8785	91	Exon (NM_170262/Ald1, exon 1 of 4)	4	26255204	26258279	3076	2	NM_170264	4117	Ald1	Ald1
chr3R	30800342	30800682	Filter_SAM_or_BAM__output_SAM_or_BAM_on_data_207__bam_peak_9387	1210	.	6.81	125.312	121.015	658	Exon (NM_170524/wts, exon 7 of 8)	4	30789625	30806619	16995	2	NM_170524	5937	wts	wts
chr3R	32061194	32061637	Filter_SAM_or_BAM__output_SAM_or_BAM_on_data_207__bam_peak_9492	345	.	2.77506	36.9003	34.5881	326	Exon (NM_170586/Map205, exon 2 of 3)	4	32055279	32068441	13163	2	NM_001276225	6804	Map205	Map205
chr3R	5270917	5271196	Filter_SAM_or_BAM__output_SAM_or_BAM_on_data_207__bam_peak_6842	44	.	1.63896	6.01345	4.45697	176	Exon (NM_170644/mtd, exon 1 of 5)	4	5264939	5269507	4569	1	NM_169037	5979	Hph	Hph
chr3R	6908159	6908389	Filter_SAM_or_BAM__output_SAM_or_BAM_on_data_207__bam_peak_6978	130	.	2.80251	14.9225	13.0888	74	Exon (NM_206454/Antp, exon 1 of 5)	4	6903442	6904682	1241	2	NR_125091	-3478	lncRNA:CR43252	lncRNA:CR43252
chr3L	632493	633048	Filter_SAM_or_BAM__output_SAM_or_BAM_on_data_207__bam_peak_4408	170	.	1.82697	18.9668	17.0332	225	Exon (NR_048209/lncRNA:CR43334, exon 1 of 1)	3	628470	642303	13834	1	NR_073904	4024	lncRNA:CR43334	lncRNA:CR43334
chr3L	633888	634137	Filter_SAM_or_BAM__output_SAM_or_BAM_on_data_207__bam_peak_4411	363	.	2.78891	38.7088	36.3606	139	Exon (NR_048209/lncRNA:CR43334, exon 1 of 1)	3	637486	638041	556	2	NR_048211	3904	lncRNA:CR43423	lncRNA:CR43423
chr3L	633128	633396	Filter_SAM_or_BAM__output_SAM_or_BAM_on_data_207__bam_peak_4409	438	.	2.68917	46.3892	43.8884	119	Exon (NR_048209/lncRNA:CR43334, exon 1 of 1)	3	637486	638041	556	2	NR_048211	4645	lncRNA:CR43423	lncRNA:CR43423
chr3L	633553	633797	Filter_SAM_or_BAM__output_SAM_or_BAM_on_data_207__bam_peak_4410	197	.	2.28295	21.7524	19.7552	143	Exon (NR_048209/lncRNA:CR43334, exon 1 of 1)	3	637486	638041	556	2	NR_048211	4244	lncRNA:CR43423	lncRNA:CR43423
chr3L	12646127	12646453	Filter_SAM_or_BAM__output_SAM_or_BAM_on_data_207__bam_peak_5623	507	.	5.37158	53.4191	50.7807	167	Exon (NR_124907/lncRNA:CR32111, exon 7 of 7)	3	12648907	12653090	4184	2	NR_048272	6637	lncRNA:CR43431	lncRNA:CR43431
chr2L	7534901	7535342	Filter_SAM_or_BAM__output_SAM_or_BAM_on_data_207__bam_peak_779	892	.	5.62248	92.7161	89.2113	233	Intron (NM_001014479/RapGAP1, intron 2 of 4)	1	7497805	7530574	32770	2	NM_001014478	-4328	RapGAP1	RapGAP1
chr3L	17569841	17570705	Filter_SAM_or_BAM__output_SAM_or_BAM_on_data_207__bam_peak_6095	995	.	6.03705	103.328	99.5677	395	Intron (NM_001014590/Eip74EF, intron 1 of 3)	3	17566042	17566162	121	2	NR_003871	-3680	snoRNA:Me28S-A576	snoRNA:Me28S-A576
chr3L	19903541	19903749	Filter_SAM_or_BAM__output_SAM_or_BAM_on_data_207__bam_peak_6383	158	.	2.49552	17.7606	15.8554	167	Intron (NM_001014591/Mi-2, intron 1 of 4)	3	19909365	19910203	839	1	NR_073953	-5616	asRNA:CR43889	asRNA:CR43889
chr3L	19904728	19905070	Filter_SAM_or_BAM__output_SAM_or_BAM_on_data_207__bam_peak_6384	380	.	3.7153	40.4449	38.0622	196	Intron (NM_001014591/Mi-2, intron 1 of 4)	3	19909365	19910203	839	1	NR_073953	-4295	asRNA:CR43889	asRNA:CR43889
chr3R	10622122	10622584	Filter_SAM_or_BAM__output_SAM_or_BAM_on_data_207__bam_peak_7379	595	.	8.05592	62.3971	59.5776	238	Intron (NM_001014613/hth, intron 1 of 7)	4	10585284	10614276	28993	2	NM_001031999	-7847	hth	hth
chr3R	17062577	17062981	Filter_SAM_or_BAM__output_SAM_or_BAM_on_data_207__bam_peak_8011	81	.	2.46366	9.89039	8.19807	302	Intron (NM_001014629/Dad, intron 3 of 7)	4	17054897	17070408	15512	1	NM_169740	7681	Dad	Dad
chr3R	17065332	17065470	Filter_SAM_or_BAM__output_SAM_or_BAM_on_data_207__bam_peak_8012	120	.	2.44303	13.8957	12.0893	140	Intron (NM_001014629/Dad, intron 5 of 7)	4	17070523	17072675	2153	2	NM_169742	7205	Ns1	Ns1
chrX	2524507	2524816	Filter_SAM_or_BAM__output_SAM_or_BAM_on_data_207__bam_peak_9827	409	.	5.34787	43.4137	40.9719	153	Intron (NM_001031862/trol, intron 2 of 34)	6	2470460	2517647	47188	2	NM_001258566	-6861	trol	trol
chr3R	9350792	9350902	Filter_SAM_or_BAM__output_SAM_or_BAM_on_data_207__bam_peak_7226	382	.	3.22944	40.6594	38.2723	163	Intron (NM_001031991/CG45050, intron 1 of 4)	4	9354268	9354342	75	1	NR_003890	-3366	snoRNA:Me18S-G1358a	snoRNA:Me18S-G1358a
chr3R	22072603	22072917	Filter_SAM_or_BAM__output_SAM_or_BAM_on_data_207__bam_peak_8524	315	.	3.12522	33.8024	31.5523	126	Intron (NM_001032032/how, intron 7 of 7)	4	22080382	22083473	3092	1	NM_142750	-7465	CG13408	CG13408
chr2R	15781177	15781406	Filter_SAM_or_BAM__output_SAM_or_BAM_on_data_207__bam_peak_3314	249	.	3.37322	27.0278	24.9155	68	Intron (NM_001032249/Zasp52, intron 5 of 14)	2	15762565	15776062	13498	2	NM_001316422	-5116	Zasp52	Zasp52
chr3R	14687636	14688010	Filter_SAM_or_BAM__output_SAM_or_BAM_on_data_207__bam_peak_7759	436	.	3.6894	46.1373	43.6411	170	Intron (NM_001032403/Meltrin, intron 1 of 7)	4	14664907	14697292	32386	2	NM_001032403	9282	Meltrin	Meltrin
chrX	1963098	1963478	Filter_SAM_or_BAM__output_SAM_or_BAM_on_data_207__bam_peak_9742	108	.	2.3476	12.6674	10.8941	227	Intron (NM_001038734/Hr4, intron 3 of 10)	6	1941940	2007956	66017	1	NM_001272234	21159	Hr4	Hr4
chr2L	14219578	14219919	Filter_SAM_or_BAM__output_SAM_or_BAM_on_data_207__bam_peak_1450	700	.	4.11448	73.0953	70.0455	460	Intron (NM_001038817/Dyrk2, intron 3 of 10)	1	14184478	14234108	49631	2	NM_001038817	14189	Dyrk2	Dyrk2
chr3R	26332372	26332743	Filter_SAM_or_BAM__output_SAM_or_BAM_on_data_207__bam_peak_8981	400	.	3.82922	42.4731	40.0496	186	Intron (NM_001038982/CG33970, intron 2 of 8)	4	26324499	26325294	796	2	NR_125269	-7079	lncRNA:CR42765	lncRNA:CR42765
chr2L	8171999	8172038	Filter_SAM_or_BAM__output_SAM_or_BAM_on_data_207__bam_peak_856	108	.	2.3476	12.6674	10.8941	172	Intron (NM_001042881/Piezo, intron 1 of 29)	1	8163073	8190137	27065	1	NM_164795	8927	Piezo	Piezo
chr2L	12361008	12361237	Filter_SAM_or_BAM__output_SAM_or_BAM_on_data_207__bam_peak_1261	66	.	2.52007	8.28453	6.64412	57	Intron (NM_001042891/bru2, intron 4 of 9)	1	12356441	12357906	1466	1	NM_135716	4568	CG17010	CG17010
chr2L	12529591	12530028	Filter_SAM_or_BAM__output_SAM_or_BAM_on_data_207__bam_peak_1292	618	.	3.9585	64.7132	61.8442	422	Intron (NM_001042894/bun, intron 5 of 6)	1	12456577	12540902	84326	2	NM_001298946	10874	bun	bun
chr2L	12513861	12514045	Filter_SAM_or_BAM__output_SAM_or_BAM_on_data_207__bam_peak_1288	83	.	2.39034	10.0216	8.32517	108	Intron (NM_001042894/bun, intron 5 of 6)	1	12508108	12508254	147	1	NR_047947	5754	snoRNA:CG43051-a	snoRNA:CG43051-a
chr2L	12514116	12514391	Filter_SAM_or_BAM__output_SAM_or_BAM_on_data_207__bam_peak_1289	507	.	5.68072	53.4271	50.7885	183	Intron (NM_001042894/bun, intron 5 of 6)	1	12508108	12508254	147	1	NR_047947	6009	snoRNA:CG43051-a	snoRNA:CG43051-a
chr2L	12520220	12520742	Filter_SAM_or_BAM__output_SAM_or_BAM_on_data_207__bam_peak_1290	295	.	3.66149	31.7456	29.5373	400	Intron (NM_001042894/bun, intron 5 of 6)	1	12508108	12508254	147	1	NR_047947	12113	snoRNA:CG43051-a	snoRNA:CG43051-a
chr2R	15135074	15135275	Filter_SAM_or_BAM__output_SAM_or_BAM_on_data_207__bam_peak_3259	135	.	3.08467	15.4037	13.5573	125	Intron (NM_001043082/chn, intron 1 of 5)	2	15128826	15144783	15958	1	NM_137169	6249	chn	chn
chr2R	15135348	15135847	Filter_SAM_or_BAM__output_SAM_or_BAM_on_data_207__bam_peak_3260	1102	.	8.18524	114.245	110.217	188	Intron (NM_001043082/chn, intron 1 of 5)	2	15128826	15144783	15958	1	NM_137169	6523	chn	chn
chr2R	15136377	15136692	Filter_SAM_or_BAM__output_SAM_or_BAM_on_data_207__bam_peak_3261	496	.	4.76196	52.2529	49.6372	173	Intron (NM_001043082/chn, intron 1 of 5)	2	15128826	15144783	15958	1	NM_137169	7552	chn	chn
chr2R	15137255	15137331	Filter_SAM_or_BAM__output_SAM_or_BAM_on_data_207__bam_peak_3262	13	.	1.46173	2.74519	1.35247	249	Intron (NM_001043082/chn, intron 1 of 5)	2	15144968	15145519	552	2	NM_001103849	8188	Rpb12	Rpb12
chr2R	15137432	15137943	Filter_SAM_or_BAM__output_SAM_or_BAM_on_data_207__bam_peak_3263	262	.	3.945	28.4097	26.2693	342	Intron (NM_001043082/chn, intron 1 of 5)	2	15144968	15145519	552	2	NM_001103849	7576	Rpb12	Rpb12
chr2R	25038433	25038801	Filter_SAM_or_BAM__output_SAM_or_BAM_on_data_207__bam_peak_4306	692	.	5.24962	72.2461	69.2144	182	Intron (NM_001043105/Nplp1, intron 4 of 4)	2	25032377	25040377	8001	1	NM_001144288	6057	Nplp1	Nplp1
chr3L	3570748	3571050	Filter_SAM_or_BAM__output_SAM_or_BAM_on_data_207__bam_peak_4777	105	.	2.47238	12.2816	10.5193	128	Intron (NM_001043116/Eip63E, intron 2 of 9)	3	3555631	3556299	669	2	NR_133166	-14450	lncRNA:CR45820	lncRNA:CR45820
chr3R	11665502	11665900	Filter_SAM_or_BAM__output_SAM_or_BAM_on_data_207__bam_peak_7471	724	.	6.23216	75.5773	72.4734	207	Intron (NM_001043241/CG42327, intron 1 of 4)	4	11674221	11674923	703	1	NM_141844	-8321	CG14715	CG14715
chr3R	24595910	24596081	Filter_SAM_or_BAM__output_SAM_or_BAM_on_data_207__bam_peak_8817	58	.	1.88363	7.5072	5.89332	186	Intron (NM_001043289/mld, intron 2 of 5)	4	24589162	24623899	34738	1	NM_143016	6749	mld	mld
chr3R	27301131	27301711	Filter_SAM_or_BAM__output_SAM_or_BAM_on_data_207__bam_peak_9075	485	.	5.25042	51.1828	48.5872	171	Intron (NM_001043297/CG3339, intron 26 of 31)	4	27291535	27292209	675	2	NM_144004	-8923	CG3348	CG3348
chr3R	28895081	28895338	Filter_SAM_or_BAM__output_SAM_or_BAM_on_data_207__bam_peak_9176	97	.	2.99391	11.5379	9.79684	172	Intron (NM_001043300/Doa, intron 3 of 12)	4	28891892	28922772	30881	1	NM_001014678	3190	Doa	Doa
chrX	2317412	2317923	Filter_SAM_or_BAM__output_SAM_or_BAM_on_data_207__bam_peak_9813	548	.	6.03772	57.6196	54.8977	290	Intron (NM_001103397/Raf, intron 2 of 6)	6	2321758	2322264	507	2	NR_047740	4341	lncRNA:CR34052	lncRNA:CR34052
chrX	2301021	2301225	Filter_SAM_or_BAM__output_SAM_or_BAM_on_data_207__bam_peak_9805	233	.	4.33713	25.4669	23.3875	128	Intron (NM_001103397/Raf, intron 2 of 6)	6	2295466	2343870	48405	1	NM_001103397	5556	Raf	Raf
chrX	2301327	2301520	Filter_SAM_or_BAM__output_SAM_or_BAM_on_data_207__bam_peak_9806	273	.	4.83724	29.5146	27.3514	102	Intron (NM_001103397/Raf, intron 2 of 6)	6	2295466	2343870	48405	1	NM_001103397	5862	Raf	Raf
chrX	2305865	2306289	Filter_SAM_or_BAM__output_SAM_or_BAM_on_data_207__bam_peak_9811	641	.	4.91261	67.0686	64.1487	204	Intron (NM_001103397/Raf, intron 2 of 6)	6	2295466	2343870	48405	1	NM_001103397	10400	Raf	Raf
chrX	9889755	9890030	Filter_SAM_or_BAM__output_SAM_or_BAM_on_data_207__bam_peak_10520	134	.	3.62234	15.2948	13.4517	108	Intron (NM_001103459/CG15249, intron 1 of 4)	6	9884442	9885044	603	1	NM_167206	5314	CG9691	CG9691
chrX	18282327	18282593	Filter_SAM_or_BAM__output_SAM_or_BAM_on_data_207__bam_peak_11255	509	.	6.47678	53.561	50.9195	187	Intron (NM_001103544/upd3, intron 3 of 3)	6	18277233	18284596	7364	1	NM_001103544	5095	upd3	upd3
chr2L	1902230	1902694	Filter_SAM_or_BAM__output_SAM_or_BAM_on_data_207__bam_peak_202	64	.	2.13802	8.09043	6.45638	180	Intron (NM_001103581/Wdr62, intron 1 of 18)	1	1911742	1943818	32077	1	NM_001258915	-9048	Wdr62	Wdr62
chr2L	3682134	3682455	Filter_SAM_or_BAM__output_SAM_or_BAM_on_data_207__bam_peak_403	312	.	3.31871	33.4591	31.216	161	Intron (NM_001103605/Drgx, intron 4 of 7)	1	3692123	3692587	465	2	NM_001298664	10132	CG16704	CG16704
chr2L	7914838	7915204	Filter_SAM_or_BAM__output_SAM_or_BAM_on_data_207__bam_peak_812	813	.	6.08587	84.6243	81.312	421	Intron (NM_001103646/Snoo, intron 2 of 2)	1	7889288	7890704	1417	2	NM_001370007	-24135	Spn28Db	Spn28Db
chr2L	13571798	13572174	Filter_SAM_or_BAM__output_SAM_or_BAM_on_data_207__bam_peak_1396	369	.	4.17346	39.3184	36.9583	115	Intron (NM_001103689/kuz, intron 3 of 10)	1	13582569	13583033	465	1	NR_124237	-10395	lncRNA:CR44973	lncRNA:CR44973
chr2L	13572479	13572995	Filter_SAM_or_BAM__output_SAM_or_BAM_on_data_207__bam_peak_1397	941	.	4.78683	97.7377	94.1135	191	Intron (NM_001103689/kuz, intron 3 of 10)	1	13582569	13583033	465	1	NR_124237	-9574	lncRNA:CR44973	lncRNA:CR44973
chr2L	13615504	13615711	Filter_SAM_or_BAM__output_SAM_or_BAM_on_data_207__bam_peak_1400	785	.	5.7203	81.7651	78.5192	333	Intron (NM_001103689/kuz, intron 5 of 10)	1	13609974	13610068	95	1	NR_047948	5531	mir-2489	mir-2489
chr2L	13614875	13615352	Filter_SAM_or_BAM__output_SAM_or_BAM_on_data_207__bam_peak_1400	785	.	5.7203	81.7651	78.5192	333	Intron (NM_001103689/kuz, intron 5 of 10)	1	13609974	13610068	95	1	NR_047948	4902	mir-2489	mir-2489
chr2R	10870943	10871219	Filter_SAM_or_BAM__output_SAM_or_BAM_on_data_207__bam_peak_2741	240	.	3.61987	26.1329	24.0395	153	Intron (NM_001103792/CG30015, intron 1 of 8)	2	10839102	10874771	35670	2	NM_001103792	3552	CG30015	CG30015
chr2R	14322425	14322721	Filter_SAM_or_BAM__output_SAM_or_BAM_on_data_207__bam_peak_3190	671	.	4.98213	70.1095	67.1231	219	Intron (NM_001103837/Shrm, intron 2 of 9)	2	14332384	14351802	19419	1	NM_166047	-9663	Shrm	Shrm
chr3L	16632577	16632863	Filter_SAM_or_BAM__output_SAM_or_BAM_on_data_207__bam_peak_5986	64	.	1.97308	8.05815	6.42558	161	Intron (NM_001104153/Abl, intron 1 of 8)	3	16615866	16647882	32017	2	NM_001104153	15019	Abl	Abl
chr3L	16630427	16630877	Filter_SAM_or_BAM__output_SAM_or_BAM_on_data_207__bam_peak_5985	598	.	3.62813	62.6573	59.8316	333	Intron (NM_001104153/Abl, intron 2 of 8)	3	16613574	16615472	1899	2	NM_001275029	-14956	Mo25	Mo25
chr3L	19569058	19569381	Filter_SAM_or_BAM__output_SAM_or_BAM_on_data_207__bam_peak_6338	521	.	4.19711	54.8198	52.1537	176	Intron (NM_001104176/Shal, intron 6 of 6)	3	19565131	19565208	78	1	NR_048299	3928	mir-9a	mir-9a
chr3R	23871313	23871615	Filter_SAM_or_BAM__output_SAM_or_BAM_on_data_207__bam_peak_8716	324	.	3.32983	34.7093	32.441	420	Intron (NM_001104420/Pli, intron 2 of 9)	4	23859467	23859630	164	2	NR_002077_3	-11684	snRNA:U1:95Cb	snRNA:U1:95Cb
chr3R	23864341	23864623	Filter_SAM_or_BAM__output_SAM_or_BAM_on_data_207__bam_peak_8713	189	.	3.48727	20.947	18.9678	159	Intron (NM_001104420/Pli, intron 3 of 9)	4	23859467	23859630	164	2	NR_002077_3	-4712	snRNA:U1:95Cb	snRNA:U1:95Cb
chr2R	13934220	13934847	Filter_SAM_or_BAM__output_SAM_or_BAM_on_data_207__bam_peak_3117	622	.	3.17416	65.1086	62.2307	337	Intron (NM_001144185/shot, intron 1 of 29)	2	13864237	13942110	77874	2	NM_001144185	7263	shot	shot
chr2L	11904227	11904498	Filter_SAM_or_BAM__output_SAM_or_BAM_on_data_207__bam_peak_1226	161	.	2.26934	18.0636	16.1513	168	Intron (NM_001144348/Pde1c, intron 3 of 9)	1	11815985	11896778	80794	2	NM_001144346	-7450	Pde1c	Pde1c
chr2L	16612750	16613004	Filter_SAM_or_BAM__output_SAM_or_BAM_on_data_207__bam_peak_1628	548	.	5.05867	57.6058	54.8843	415	Intron (NM_001144357/mtgo, intron 2 of 4)	1	16607370	16610037	2668	1	NM_135955	5381	CG4631	CG4631
chr2L	16610906	16611158	Filter_SAM_or_BAM__output_SAM_or_BAM_on_data_207__bam_peak_1627	369	.	3.37407	39.3554	36.9945	86	Intron (NM_001144357/mtgo, intron 2 of 4)	1	16607370	16610037	2668	1	NM_135955	3537	CG4631	CG4631
chr2L	16637258	16637757	Filter_SAM_or_BAM__output_SAM_or_BAM_on_data_207__bam_peak_1630	801	.	3.69204	83.3906	80.1075	381	Intron (NM_001144357/mtgo, intron 2 of 4)	1	16628752	16629173	422	2	NR_073791	-8086	lncRNA:CR44151	lncRNA:CR44151
chr2L	16639432	16639959	Filter_SAM_or_BAM__output_SAM_or_BAM_on_data_207__bam_peak_1631	487	.	4.03815	51.3622	48.7636	565	Intron (NM_001144357/mtgo, intron 2 of 4)	1	16628752	16629173	422	2	NR_073791	-10260	lncRNA:CR44151	lncRNA:CR44151
chr2L	16587720	16588390	Filter_SAM_or_BAM__output_SAM_or_BAM_on_data_207__bam_peak_1622	443	.	2.69871	46.8254	44.3158	254	Intron (NM_001144357/mtgo, intron 2 of 4)	1	16601827	16663218	61392	1	NM_001273575	-13437	mtgo	mtgo
chr2L	16588540	16588963	Filter_SAM_or_BAM__output_SAM_or_BAM_on_data_207__bam_peak_1623	470	.	3.1171	49.662	47.0962	198	Intron (NM_001144357/mtgo, intron 2 of 4)	1	16601827	16663218	61392	1	NM_001273575	-12864	mtgo	mtgo
chr3L	20193824	20193837	Filter_SAM_or_BAM__output_SAM_or_BAM_on_data_207__bam_peak_6409	136	.	2.08098	15.4954	13.6471	178	Intron (NM_001144512/CG42674, intron 1 of 14)	3	20149614	20198317	48704	2	NM_001144512	4480	CG42674	CG42674
chr3R	6401154	6401244	Filter_SAM_or_BAM__output_SAM_or_BAM_on_data_207__bam_peak_6945	144	.	2.46756	16.3205	14.4511	102	Intron (NM_001144543/Dmtn, intron 1 of 9)	4	6389162	6405895	16734	2	NM_001144543	4651	Dmtn	Dmtn
chr3R	6401390	6401623	Filter_SAM_or_BAM__output_SAM_or_BAM_on_data_207__bam_peak_6946	69	.	2.04906	8.59183	6.94145	124	Intron (NM_001144543/Dmtn, intron 1 of 9)	4	6389162	6405895	16734	2	NM_001144543	4272	Dmtn	Dmtn
chrX	12255163	12255525	Filter_SAM_or_BAM__output_SAM_or_BAM_on_data_207__bam_peak_10697	254	.	5.05326	27.5878	25.4638	170	Intron (NM_001169259/Ten-a, intron 6 of 19)	6	12274635	12275155	521	1	NM_001298222	-19110	CG45603	CG45603
chrX	12219447	12220027	Filter_SAM_or_BAM__output_SAM_or_BAM_on_data_207__bam_peak_10696	476	.	6.00528	50.2512	47.6739	513	Intron (NM_001169259/Ten-a, intron 6 of 19)	6	12229923	12332165	102243	1	NM_001169258	-9896	Ten-a	Ten-a
chr2R	6120422	6120998	Filter_SAM_or_BAM__output_SAM_or_BAM_on_data_207__bam_peak_2166	434	.	3.7798	45.9654	43.4729	171	Intron (NM_001169590/EcR, intron 2 of 5)	2	6087873	6131841	43969	2	NM_001169590	10843	EcR	EcR
chr2R	11626301	11626690	Filter_SAM_or_BAM__output_SAM_or_BAM_on_data_207__bam_peak_2845	564	.	4.65125	59.2126	56.4585	305	Intron (NM_001169647/CG9005, intron 2 of 7)	2	11619479	11632515	13037	2	NM_001169647	5825	CG9005	CG9005
chr2R	11628356	11628434	Filter_SAM_or_BAM__output_SAM_or_BAM_on_data_207__bam_peak_2846	253	.	3.14903	27.4645	25.3435	178	Intron (NM_001169647/CG9005, intron 2 of 7)	2	11619479	11632515	13037	2	NM_001169647	4081	CG9005	CG9005
chr2R	18342276	18342530	Filter_SAM_or_BAM__output_SAM_or_BAM_on_data_207__bam_peak_3618	176	.	2.88934	19.5664	17.6187	98	Intron (NM_001169720/sbb, intron 2 of 11)	2	18278198	18357296	79099	2	NM_001169720	14766	sbb	sbb
chr2R	18349852	18350109	Filter_SAM_or_BAM__output_SAM_or_BAM_on_data_207__bam_peak_3619	144	.	3.02909	16.3633	14.4928	185	Intron (NM_001169720/sbb, intron 2 of 11)	2	18278198	18357296	79099	2	NM_001169720	7187	sbb	sbb
chr2R	18351574	18352242	Filter_SAM_or_BAM__output_SAM_or_BAM_on_data_207__bam_peak_3621	577	.	4.50789	60.4879	57.7079	282	Intron (NM_001169720/sbb, intron 2 of 11)	2	18278198	18357296	79099	2	NM_001169720	5054	sbb	sbb
chr2R	18307700	18308255	Filter_SAM_or_BAM__output_SAM_or_BAM_on_data_207__bam_peak_3615	645	.	6.01444	67.4647	64.5365	199	Intron (NM_001169720/sbb, intron 2 of 11)	2	18311822	18311998	177	1	NM_144112	-3567	Tango8	Tango8
chr2R	25076389	25076784	Filter_SAM_or_BAM__output_SAM_or_BAM_on_data_207__bam_peak_4309	453	.	3.35406	47.9174	45.3862	218	Intron (NM_001169829/gol, intron 3 of 7)	2	25072627	25084347	11721	2	NM_001169829	7563	gol	gol
chr3L	14781067	14781480	Filter_SAM_or_BAM__output_SAM_or_BAM_on_data_207__bam_peak_5786	664	.	5.61257	69.3726	66.4028	476	Intron (NM_001169974/bmm, intron 1 of 6)	3	14776496	14786412	9917	2	NM_001169974	4932	bmm	bmm
chr3R	31928441	31928781	Filter_SAM_or_BAM__output_SAM_or_BAM_on_data_207__bam_peak_9484	737	.	7.66746	76.9092	73.7743	172	Intron (NM_001170322/heph, intron 3 of 12)	4	31851020	31935170	84151	2	NM_079964	6389	heph	heph
chrX	14947310	14947620	Filter_SAM_or_BAM__output_SAM_or_BAM_on_data_207__bam_peak_10923	603	.	5.50539	63.1453	60.3098	336	Intron (NM_001201661/pdgy, intron 4 of 7)	6	14934040	14950749	16710	2	NM_132760	3129	pdgy	pdgy
chrX	14960995	14961270	Filter_SAM_or_BAM__output_SAM_or_BAM_on_data_207__bam_peak_10927	147	.	3.77304	16.5759	14.7004	122	Intron (NM_001201662/eag, intron 2 of 12)	6	14955477	15009989	54513	1	NM_078603	5519	eag	eag
chr2L	1657142	1657448	Filter_SAM_or_BAM__output_SAM_or_BAM_on_data_207__bam_peak_183	217	.	3.27182	23.7985	21.7556	170	Intron (NM_001201751/chinmo, intron 2 of 6)	1	1651258	1704682	53425	1	NM_001258910	5885	chinmo	chinmo
chr2L	8601740	8602028	Filter_SAM_or_BAM__output_SAM_or_BAM_on_data_207__bam_peak_925	86	.	2.15487	10.3861	8.67826	143	Intron (NM_001201802/Sema1a, intron 4 of 22)	1	8590370	8594489	4120	2	NR_073744	-7252	lncRNA:CR43855	lncRNA:CR43855
chr2L	8619780	8619994	Filter_SAM_or_BAM__output_SAM_or_BAM_on_data_207__bam_peak_927	46	.	1.74801	6.23196	4.66635	190	Intron (NM_001201802/Sema1a, intron 4 of 22)	1	8590370	8594489	4120	2	NR_073744	-25292	lncRNA:CR43855	lncRNA:CR43855
chr2R	12732055	12733013	Filter_SAM_or_BAM__output_SAM_or_BAM_on_data_207__bam_peak_2984	338	.	3.30774	36.1418	33.8449	999	Intron (NM_001201986/CG42663, intron 2 of 8)	2	12751483	12752936	1454	2	NM_136973	19923	Mos	Mos
chr3R	15125299	15125807	Filter_SAM_or_BAM__output_SAM_or_BAM_on_data_207__bam_peak_7800	384	.	3.65478	40.8791	38.4879	324	Intron (NM_001202293/CG42788, intron 1 of 9)	4	15130754	15130859	106	2	NR_048392	5052	mir-2493	mir-2493
chr4	384551	384695	Filter_SAM_or_BAM__output_SAM_or_BAM_on_data_207__bam_peak_9521	126	.	2.49704	14.4459	12.6248	82	Intron (NM_001258493/dati, intron 2 of 8)	5	375640	388322	12683	2	NM_001258493	3627	dati	dati
chrX	546678	547106	Filter_SAM_or_BAM__output_SAM_or_BAM_on_data_207__bam_peak_9619	767	.	4.71557	79.9864	76.7802	468	Intron (NM_001258520/Appl, intron 2 of 10)	6	531170	579044	47875	1	NM_001258519	15509	Appl	Appl
chr2L	166410	166946	Filter_SAM_or_BAM__output_SAM_or_BAM_on_data_207__bam_peak_35	1080	.	5.98183	112.076	108.099	447	Intron (NM_001258887/spen, intron 2 of 12)	1	159032	203397	44366	1	NM_079979	7379	spen	spen
chr2L	22182269	22182552	Filter_SAM_or_BAM__output_SAM_or_BAM_on_data_207__bam_peak_2072	526	.	5.72098	55.3658	52.6891	272	Intron (NM_001259202/CG3635, intron 1 of 2)	1	22175415	22183991	8577	1	NM_136294	6855	CG3635	CG3635
chr2R	9056055	9056396	Filter_SAM_or_BAM__output_SAM_or_BAM_on_data_207__bam_peak_2497	736	.	6.98586	76.8026	73.6699	170	Intron (NM_001259285/CG13743, intron 2 of 9)	2	9044850	9059907	15058	2	NM_001259285	3511	CG13743	CG13743
chr2R	11637183	11637832	Filter_SAM_or_BAM__output_SAM_or_BAM_on_data_207__bam_peak_2854	461	.	3.8559	48.6692	46.1227	546	Intron (NM_001259338/CG9005, intron 1 of 7)	2	11619850	11640941	21092	2	NM_001259338	3109	CG9005	CG9005
chr2R	14083771	14083912	Filter_SAM_or_BAM__output_SAM_or_BAM_on_data_207__bam_peak_3157	569	.	4.08547	59.7241	56.9593	299	Intron (NM_001259386/Prosap, intron 3 of 10)	2	14090325	14090972	648	1	NM_001144193	-6413	CG42287	CG42287
chr3L	2531333	2531673	Filter_SAM_or_BAM__output_SAM_or_BAM_on_data_207__bam_peak_4627	144	.	2.93328	16.3515	14.4814	165	Intron (NM_001259647/Spn, intron 2 of 14)	3	2525799	2526973	1175	2	NM_167954	-4361	CG32295	CG32295
chr3L	2851774	2852189	Filter_SAM_or_BAM__output_SAM_or_BAM_on_data_207__bam_peak_4664	524	.	4.00745	55.0842	52.4133	185	Intron (NM_001259652/Tet, intron 3 of 9)	3	2786207	2879158	92952	2	NM_001259652	26969	Tet	Tet
chr3L	2867594	2867729	Filter_SAM_or_BAM__output_SAM_or_BAM_on_data_207__bam_peak_4666	773	.	6.06145	80.5455	77.327	160	Intron (NM_001259652/Tet, intron 3 of 9)	3	2786207	2879158	92952	2	NM_001259652	11429	Tet	Tet
chr3L	3456931	3457200	Filter_SAM_or_BAM__output_SAM_or_BAM_on_data_207__bam_peak_4762	250	.	3.32712	27.1991	25.0833	193	Intron (NM_001259671/eIF5B, intron 4 of 7)	3	3428658	3460603	31946	2	NM_001259671	3403	eIF5B	eIF5B
chr3L	3432864	3433391	Filter_SAM_or_BAM__output_SAM_or_BAM_on_data_207__bam_peak_4749	1028	.	6.06832	106.736	102.889	1121	Intron (NM_001259671/eIF5B, intron 7 of 7)	3	3401153	3424935	23783	2	NM_168031	-7930	sty	sty
chr3L	3437367	3437771	Filter_SAM_or_BAM__output_SAM_or_BAM_on_data_207__bam_peak_4752	672	.	4.71117	70.2854	67.2953	349	Intron (NM_001259671/eIF5B, intron 7 of 7)	3	3401153	3424935	23783	2	NM_168031	-12433	sty	sty
chr3L	3438410	3438413	Filter_SAM_or_BAM__output_SAM_or_BAM_on_data_207__bam_peak_4753	345	.	3.88984	36.8238	34.5132	104	Intron (NM_001259671/eIF5B, intron 7 of 7)	3	3401153	3424935	23783	2	NM_168031	-13476	sty	sty
chr3L	3439497	3439733	Filter_SAM_or_BAM__output_SAM_or_BAM_on_data_207__bam_peak_4755	128	.	2.56697	14.713	12.8851	70	Intron (NM_001259671/eIF5B, intron 7 of 7)	3	3401153	3424935	23783	2	NM_168031	-14563	sty	sty
chr3L	7781734	7781942	Filter_SAM_or_BAM__output_SAM_or_BAM_on_data_207__bam_peak_5084	120	.	2.32327	13.8694	12.0638	142	Intron (NM_001259731/CG32369, intron 2 of 6)	3	7763970	7775603	11634	2	NM_001014576	-6132	Clk	Clk
chr3L	10508028	10508228	Filter_SAM_or_BAM__output_SAM_or_BAM_on_data_207__bam_peak_5395	98	.	3.07503	11.5818	9.83954	96	Intron (NM_001259779/Rbfox1, intron 2 of 13)	3	10516003	10590925	74923	1	NM_001104104	-7775	Rbfox1	Rbfox1
chr3L	10522393	10523016	Filter_SAM_or_BAM__output_SAM_or_BAM_on_data_207__bam_peak_5399	353	.	4.58833	37.695	35.3677	187	Intron (NM_001259779/Rbfox1, intron 2 of 13)	3	10516003	10594012	78010	1	NM_168412	6391	Rbfox1	Rbfox1
chr3L	14212287	14212720	Filter_SAM_or_BAM__output_SAM_or_BAM_on_data_207__bam_peak_5733	246	.	3.65719	26.7141	24.6085	269	Intron (NM_001259820/nuf, intron 6 of 11)	3	14218204	14218974	771	1	NM_140440	-5484	CG7768	CG7768
chr3L	16061318	16061417	Filter_SAM_or_BAM__output_SAM_or_BAM_on_data_207__bam_peak_5923	144	.	2.68079	16.2867	14.4181	82	Intron (NM_001259858/Mbs, intron 2 of 16)	3	16051959	16082026	30068	1	NM_168648	9360	Mbs	Mbs
chr3L	16061573	16061737	Filter_SAM_or_BAM__output_SAM_or_BAM_on_data_207__bam_peak_5924	185	.	2.89749	20.5472	18.5768	144	Intron (NM_001259858/Mbs, intron 2 of 16)	3	16051959	16082026	30068	1	NM_168648	9615	Mbs	Mbs
chr3L	16158028	16158766	Filter_SAM_or_BAM__output_SAM_or_BAM_on_data_207__bam_peak_5936	802	.	5.0304	83.5356	80.2496	283	Intron (NM_001259861/CG5151, intron 1 of 4)	3	16137802	16164701	26900	2	NM_001259861	5935	CG5151	CG5151
chr3L	17603656	17604301	Filter_SAM_or_BAM__output_SAM_or_BAM_on_data_207__bam_peak_6105	639	.	4.7013	66.8225	63.9079	370	Intron (NM_001259887/Eip74EF, intron 1 of 7)	3	17560158	17619325	59168	2	NM_001259887	15024	Eip74EF	Eip74EF
chr3L	17606565	17607327	Filter_SAM_or_BAM__output_SAM_or_BAM_on_data_207__bam_peak_6106	798	.	4.46421	83.0772	79.8013	372	Intron (NM_001259887/Eip74EF, intron 1 of 7)	3	17560158	17619325	59168	2	NM_001259887	11998	Eip74EF	Eip74EF
chr3L	17612077	17612389	Filter_SAM_or_BAM__output_SAM_or_BAM_on_data_207__bam_peak_6107	127	.	2.73745	14.5499	12.7262	163	Intron (NM_001259887/Eip74EF, intron 1 of 7)	3	17560158	17619325	59168	2	NM_001259887	6936	Eip74EF	Eip74EF
chr3L	17612532	17612645	Filter_SAM_or_BAM__output_SAM_or_BAM_on_data_207__bam_peak_6108	84	.	2.33283	10.1981	8.49665	129	Intron (NM_001259887/Eip74EF, intron 1 of 7)	3	17560158	17619325	59168	2	NM_001259887	6680	Eip74EF	Eip74EF
chr3L	17613867	17614516	Filter_SAM_or_BAM__output_SAM_or_BAM_on_data_207__bam_peak_6110	607	.	3.5614	63.6001	60.7542	579	Intron (NM_001259887/Eip74EF, intron 1 of 7)	3	17560158	17619325	59168	2	NM_001259887	4809	Eip74EF	Eip74EF
chr3L	17590285	17591305	Filter_SAM_or_BAM__output_SAM_or_BAM_on_data_207__bam_peak_6103	937	.	7.27524	97.3298	93.7153	455	Intron (NM_001259887/Eip74EF, intron 5 of 7)	3	17560158	17576626	16469	2	NM_168741	-13660	Eip74EF	Eip74EF
chr3L	17596941	17597150	Filter_SAM_or_BAM__output_SAM_or_BAM_on_data_207__bam_peak_6104	119	.	3.17171	13.7353	11.9328	160	Intron (NM_001259887/Eip74EF, intron 5 of 7)	3	17560158	17576626	16469	2	NM_168741	-20316	Eip74EF	Eip74EF
chr3L	17994255	17994651	Filter_SAM_or_BAM__output_SAM_or_BAM_on_data_207__bam_peak_6167	865	.	5.7358	89.98	86.539	1326	Intron (NM_001259893/Eip75B, intron 3 of 7)	3	17952162	17999821	47660	2	NM_168756	5170	Eip75B	Eip75B
chr3L	17995436	17995806	Filter_SAM_or_BAM__output_SAM_or_BAM_on_data_207__bam_peak_6167	865	.	5.7358	89.98	86.539	1326	Intron (NM_001259893/Eip75B, intron 3 of 7)	3	17952162	17999821	47660	2	NM_168756	4015	Eip75B	Eip75B
chr3L	18019627	18019916	Filter_SAM_or_BAM__output_SAM_or_BAM_on_data_207__bam_peak_6177	61	.	1.9335	7.76311	6.13981	170	Intron (NM_001259893/Eip75B, intron 3 of 7)	3	17953358	18026032	72675	2	NM_001316451	6116	Eip75B	Eip75B
chr3L	18029411	18029931	Filter_SAM_or_BAM__output_SAM_or_BAM_on_data_207__bam_peak_6179	399	.	3.09965	42.3278	39.9074	207	Intron (NM_001259893/Eip75B, intron 3 of 7)	3	17953358	18026032	72675	2	NM_001316451	-3380	Eip75B	Eip75B
chr3L	17988159	17988461	Filter_SAM_or_BAM__output_SAM_or_BAM_on_data_207__bam_peak_6165	621	.	3.98827	65.0041	62.1285	171	Intron (NM_001259893/Eip75B, intron 4 of 7)	3	17981321	17981841	521	2	NR_133261	-6319	lncRNA:CR45921	lncRNA:CR45921
chr3L	17958113	17958474	Filter_SAM_or_BAM__output_SAM_or_BAM_on_data_207__bam_peak_6158	696	.	4.55676	72.7176	69.676	661	Intron (NM_001259893/Eip75B, intron 6 of 7)	3	17953358	17961814	8457	2	NM_168757	3340	Eip75B	Eip75B
chr3L	18760672	18760986	Filter_SAM_or_BAM__output_SAM_or_BAM_on_data_207__bam_peak_6241	148	.	3.08147	16.7661	14.8856	127	Intron (NM_001259895/ftz-f1, intron 1 of 7)	3	18751749	18764956	13208	2	NM_168775	3970	ftz-f1	ftz-f1
chr3L	18758867	18759730	Filter_SAM_or_BAM__output_SAM_or_BAM_on_data_207__bam_peak_6240	1349	.	7.32908	139.593	134.922	464	Intron (NM_001259895/ftz-f1, intron 1 of 7)	3	18753797	18754085	289	2	NR_133269	-4783	lncRNA:CR45938	lncRNA:CR45938
chr3L	21262441	21262829	Filter_SAM_or_BAM__output_SAM_or_BAM_on_data_207__bam_peak_6536	345	.	3.2439	36.8878	34.5757	193	Intron (NM_001259934/Eip78C, intron 4 of 6)	3	21258020	21258758	739	1	NM_001259935	4422	CG43218	CG43218
chr3R	10392569	10392936	Filter_SAM_or_BAM__output_SAM_or_BAM_on_data_207__bam_peak_7364	979	.	4.91177	101.676	97.9561	273	Intron (NM_001260095/cwo, intron 1 of 2)	4	10388258	10400752	12495	1	NM_080036	4312	cwo	cwo
chr3R	14346735	14347407	Filter_SAM_or_BAM__output_SAM_or_BAM_on_data_207__bam_peak_7716	1080	.	7.4914	112.004	108.028	492	Intron (NM_001260174/NK7.1, intron 3 of 5)	4	14358356	14361786	3431	2	NM_169581	14379	HEATR2	HEATR2
chr3R	20261685	20262193	Filter_SAM_or_BAM__output_SAM_or_BAM_on_data_207__bam_peak_8293	496	.	3.03994	52.2957	49.6788	591	Intron (NM_001260274/cic, intron 2 of 18)	4	20252770	20303942	51173	1	NM_001275826	8916	cic	cic
chr3R	20286916	20287208	Filter_SAM_or_BAM__output_SAM_or_BAM_on_data_207__bam_peak_8297	270	.	3.05647	29.237	27.0791	129	Intron (NM_001260274/cic, intron 2 of 18)	4	20293044	20301377	8334	1	NM_001260275	-5836	cic	cic
chr3R	23788848	23789042	Filter_SAM_or_BAM__output_SAM_or_BAM_on_data_207__bam_peak_8707	146	.	2.75235	16.4943	14.6205	143	Intron (NM_001260338/mbc, intron 1 of 14)	4	23781765	23801634	19870	1	NM_057796	7084	mbc	mbc
chr3R	25528568	25528963	Filter_SAM_or_BAM__output_SAM_or_BAM_on_data_207__bam_peak_8907	776	.	4.71153	80.9122	77.6859	263	Intron (NM_001260374/msi, intron 2 of 6)	4	25518323	25601136	82814	1	NM_170229	10246	msi	msi
chr3R	26504608	26504901	Filter_SAM_or_BAM__output_SAM_or_BAM_on_data_207__bam_peak_8994	46	.	1.85199	6.21185	4.64686	64	Intron (NM_001260388/plum, intron 2 of 10)	4	26509539	26510100	562	2	NR_133460	5199	lncRNA:CR46083	lncRNA:CR46083
chr4	508478	508807	Filter_SAM_or_BAM__output_SAM_or_BAM_on_data_207__bam_peak_9536	548	.	4.09226	57.5586	54.8391	1214	Intron (NM_001272130/zfh2, intron 2 of 12)	5	501810	540874	39065	1	NM_001258496	6669	zfh2	zfh2
chr4	507502	507910	Filter_SAM_or_BAM__output_SAM_or_BAM_on_data_207__bam_peak_9536	548	.	4.09226	57.5586	54.8391	1214	Intron (NM_001272130/zfh2, intron 2 of 12)	5	501810	540874	39065	1	NM_001258496	5693	zfh2	zfh2
chr4	519642	519898	Filter_SAM_or_BAM__output_SAM_or_BAM_on_data_207__bam_peak_9537	137	.	3.00685	15.6194	13.7677	110	Intron (NM_001272130/zfh2, intron 3 of 12)	5	501810	540874	39065	1	NM_001258496	17833	zfh2	zfh2
chr4	941481	941700	Filter_SAM_or_BAM__output_SAM_or_BAM_on_data_207__bam_peak_9562	128	.	2.94844	14.6262	12.8004	119	Intron (NM_001272148/mGluR, intron 3 of 5)	5	936819	949441	12623	1	NM_001272147	4663	mGluR	mGluR
chrX	2289186	2289443	Filter_SAM_or_BAM__output_SAM_or_BAM_on_data_207__bam_peak_9799	70	.	2.85619	8.65474	7.00239	239	Intron (NM_001272255/CG2865, intron 2 of 2)	6	2278031	2293411	15381	2	NM_001272255	3968	CG2865	CG2865
chrX	10561296	10561651	Filter_SAM_or_BAM__output_SAM_or_BAM_on_data_207__bam_peak_10554	114	.	2.86049	13.2785	11.4882	155	Intron (NM_001272486/spri, intron 4 of 10)	6	10490347	10557362	67016	2	NM_001272492	-3935	spri	spri
chrX	10735574	10735889	Filter_SAM_or_BAM__output_SAM_or_BAM_on_data_207__bam_peak_10564	141	.	3.57707	16.036	14.1737	94	Intron (NM_001272497/stx, intron 1 of 3)	6	10744502	10748806	4305	1	NM_167240	-8613	ras	ras
chrX	10721863	10722048	Filter_SAM_or_BAM__output_SAM_or_BAM_on_data_207__bam_peak_10562	700	.	8.32461	73.0614	70.0125	207	Intron (NM_001272497/stx, intron 2 of 3)	6	10744502	10748806	4305	1	NM_167240	-22454	ras	ras
chrX	11684373	11684703	Filter_SAM_or_BAM__output_SAM_or_BAM_on_data_207__bam_peak_10647	386	.	5.09063	41.0804	38.6852	337	Intron (NM_001272526/bif, intron 3 of 4)	6	11678970	11694740	15771	1	NM_167295	5404	bif	bif
chrX	12574828	12575149	Filter_SAM_or_BAM__output_SAM_or_BAM_on_data_207__bam_peak_10712	228	.	3.61652	24.8732	22.8068	204	Intron (NM_001272557/Pits, intron 1 of 2)	6	12516634	12568452	51819	2	NM_001272555	-6377	hwt	hwt
chrX	12735130	12735554	Filter_SAM_or_BAM__output_SAM_or_BAM_on_data_207__bam_peak_10749	1133	.	10.6546	117.406	113.305	625	Intron (NM_001272562/Smr, intron 2 of 10)	6	12717624	12730953	13330	2	NR_073653	-4178	lncRNA:CR43963	lncRNA:CR43963
chrX	12735823	12736150	Filter_SAM_or_BAM__output_SAM_or_BAM_on_data_207__bam_peak_10749	1133	.	10.6546	117.406	113.305	625	Intron (NM_001272562/Smr, intron 2 of 10)	6	12717624	12730953	13330	2	NR_073653	-4871	lncRNA:CR43963	lncRNA:CR43963
chrX	12724245	12724768	Filter_SAM_or_BAM__output_SAM_or_BAM_on_data_207__bam_peak_10743	658	.	5.2702	68.8039	65.8464	272	Intron (NM_001272562/Smr, intron 3 of 10)	6	12717624	12718460	837	2	NR_073654	-5786	lncRNA:CR43963	lncRNA:CR43963
chrX	14862419	14862645	Filter_SAM_or_BAM__output_SAM_or_BAM_on_data_207__bam_peak_10919	52	.	1.89666	6.81074	5.22207	155	Intron (NM_001272623/Flo2, intron 2 of 6)	6	14854328	14856361	2034	2	NM_132750	-6059	CG9519	CG9519
chr2L	313416	313745	Filter_SAM_or_BAM__output_SAM_or_BAM_on_data_207__bam_peak_58	179	.	2.89044	19.9353	17.9788	178	Intron (NM_001272889/Plc21C, intron 1 of 15)	1	310200	347927	37728	1	NM_205883	3217	Plc21C	Plc21C
chr2L	484467	484847	Filter_SAM_or_BAM__output_SAM_or_BAM_on_data_207__bam_peak_76	942	.	5.45555	97.8628	94.2348	639	Intron (NM_001272901/ush, intron 1 of 7)	1	476446	479688	3243	2	NM_164384	-4780	cbt	cbt
chr2L	485364	486132	Filter_SAM_or_BAM__output_SAM_or_BAM_on_data_207__bam_peak_77	679	.	3.89365	70.9846	67.9801	504	Intron (NM_001272901/ush, intron 1 of 7)	1	490835	492649	1815	1	NR_133060	-4703	lncRNA:CR46258	lncRNA:CR46258
chr2L	505291	505605	Filter_SAM_or_BAM__output_SAM_or_BAM_on_data_207__bam_peak_88	208	.	2.89793	22.8841	20.861	406	Intron (NM_001272901/ush, intron 1 of 7)	1	500873	502236	1364	2	NR_133062	-3056	lncRNA:CR46259	lncRNA:CR46259
chr2L	519273	519728	Filter_SAM_or_BAM__output_SAM_or_BAM_on_data_207__bam_peak_91	951	.	5.86979	98.7896	95.1388	274	Intron (NM_001272901/ush, intron 1 of 7)	1	523466	540560	17095	1	NM_057432	-3738	ush	ush
chr2L	519781	519807	Filter_SAM_or_BAM__output_SAM_or_BAM_on_data_207__bam_peak_92	29	.	1.66269	4.39206	2.90719	219	Intron (NM_001272901/ush, intron 1 of 7)	1	523466	540560	17095	1	NM_057432	-3659	ush	ush
chr2L	1406468	1406706	Filter_SAM_or_BAM__output_SAM_or_BAM_on_data_207__bam_peak_163	99	.	2.16136	11.6921	9.94617	171	Intron (NM_001272939/robo2, intron 1 of 13)	1	1380086	1420453	40368	2	NM_001272939	13747	robo2	robo2
chr2L	2169096	2169511	Filter_SAM_or_BAM__output_SAM_or_BAM_on_data_207__bam_peak_235	362	.	3.74691	38.5549	36.21	189	Intron (NM_001272979/aop, intron 2 of 4)	1	2156792	2161527	4736	2	NM_001272980	-7570	aop	aop
chr2L	9182580	9183063	Filter_SAM_or_BAM__output_SAM_or_BAM_on_data_207__bam_peak_979	599	.	4.55515	62.7554	59.9277	304	Intron (NM_001273351/tai, intron 1 of 12)	1	9176358	9250211	73854	1	NM_001201819	6223	tai	tai
chr2L	9231798	9232012	Filter_SAM_or_BAM__output_SAM_or_BAM_on_data_207__bam_peak_988	45	.	2.01519	6.07293	4.51477	91	Intron (NM_001273351/tai, intron 2 of 12)	1	9250048	9251042	995	2	NM_001298846	19030	aust	aust
chr2L	9203311	9203943	Filter_SAM_or_BAM__output_SAM_or_BAM_on_data_207__bam_peak_982	538	.	4.35928	56.5309	53.8313	351	Intron (NM_001273351/tai, intron 2 of 12)	1	9176358	9250211	73854	1	NM_001201819	26954	tai	tai
chr2L	9237425	9238040	Filter_SAM_or_BAM__output_SAM_or_BAM_on_data_207__bam_peak_989	1065	.	5.4988	110.531	106.593	362	Intron (NM_001273351/tai, intron 4 of 12)	1	9250048	9251042	995	2	NM_001298846	13002	aust	aust
chr2L	11045090	11045496	Filter_SAM_or_BAM__output_SAM_or_BAM_on_data_207__bam_peak_1181	630	.	4.12976	65.924	63.0283	780	Intron (NM_001273443/Samuel, intron 2 of 6)	1	11034795	11035308	514	1	NM_144308	10296	CG18666	CG18666
chr2L	13514157	13514652	Filter_SAM_or_BAM__output_SAM_or_BAM_on_data_207__bam_peak_1387	1180	.	6.66395	122.234	118.019	121	Intron (NM_001273516/B4, intron 3 of 6)	1	13527841	13528537	697	1	NM_001032084	-13189	CG33640	CG33640
chr2L	13516215	13516340	Filter_SAM_or_BAM__output_SAM_or_BAM_on_data_207__bam_peak_1388	44	.	1.79202	6.0312	4.47427	26	Intron (NM_001273516/B4, intron 3 of 6)	1	13527841	13528537	697	1	NM_001032084	-11501	CG33640	CG33640
chr2L	13511376	13511775	Filter_SAM_or_BAM__output_SAM_or_BAM_on_data_207__bam_peak_1384	668	.	5.35682	69.8616	66.8815	199	Intron (NM_001273516/B4, intron 4 of 6)	1	13496085	13500427	4343	1	NM_165045	15292	CG42784	CG42784
chr2L	19887442	19887882	Filter_SAM_or_BAM__output_SAM_or_BAM_on_data_207__bam_peak_1876	748	.	5.09104	78.0555	74.8941	175	Intron (NM_001273674/sick, intron 4 of 15)	1	19890201	19892550	2350	2	NM_206009	4668	CG10481	CG10481
chr2L	20913153	20913525	Filter_SAM_or_BAM__output_SAM_or_BAM_on_data_207__bam_peak_1966	547	.	2.99767	57.4203	54.7027	1143	Intron (NM_001273721/sky, intron 1 of 10)	1	20871335	20917461	46127	2	NM_001273721	3936	sky	sky
chr2L	20913948	20914435	Filter_SAM_or_BAM__output_SAM_or_BAM_on_data_207__bam_peak_1967	361	.	2.65543	38.4647	36.1219	246	Intron (NM_001273721/sky, intron 1 of 10)	1	20871335	20917461	46127	2	NM_001273721	3026	sky	sky
chr2R	7378313	7378786	Filter_SAM_or_BAM__output_SAM_or_BAM_on_data_207__bam_peak_2291	207	.	3.03187	22.7434	20.7234	385	Intron (NM_001273835/Dscam1, intron 1 of 21)	2	7319554	7381869	62316	2	NM_001043011	3083	Dscam1	Dscam1
chr2R	7352296	7352800	Filter_SAM_or_BAM__output_SAM_or_BAM_on_data_207__bam_peak_2286	645	.	6.48687	67.448	64.5203	248	Intron (NM_001273835/Dscam1, intron 6 of 21)	2	7343345	7343695	351	1	NR_073851	8952	asRNA:CR44071	asRNA:CR44071
chr2R	7691480	7691730	Filter_SAM_or_BAM__output_SAM_or_BAM_on_data_207__bam_peak_2338	120	.	2.67054	13.8284	12.0236	94	Intron (NM_001273859/LRR, intron 1 of 21)	2	7677070	7695381	18312	2	NM_136472	3651	LRR	LRR
chr2R	11089999	11090433	Filter_SAM_or_BAM__output_SAM_or_BAM_on_data_207__bam_peak_2756	432	.	4.06286	45.7867	43.2983	188	Intron (NM_001273950/luna, intron 2 of 4)	2	11086245	11086845	601	2	NM_001259332	-3155	CG43189	CG43189
chr2R	11096388	11096860	Filter_SAM_or_BAM__output_SAM_or_BAM_on_data_207__bam_peak_2758	490	.	3.41976	51.6771	49.0724	411	Intron (NM_001273950/luna, intron 2 of 4)	2	11086245	11086845	601	2	NM_001259332	-9544	CG43189	CG43189
chr2R	11098351	11098646	Filter_SAM_or_BAM__output_SAM_or_BAM_on_data_207__bam_peak_2759	143	.	2.42334	16.1877	14.3215	65	Intron (NM_001273950/luna, intron 2 of 4)	2	10977956	11106816	128861	2	NM_001273950	8170	luna	luna
chr2R	11192047	11192368	Filter_SAM_or_BAM__output_SAM_or_BAM_on_data_207__bam_peak_2778	263	.	4.25303	28.5177	26.3746	152	Intron (NM_001273953/shn, intron 2 of 7)	2	11198276	11217394	19119	1	NM_134279	-5908	shn	shn
chr2R	11192929	11193212	Filter_SAM_or_BAM__output_SAM_or_BAM_on_data_207__bam_peak_2779	111	.	2.71239	12.8846	11.1057	154	Intron (NM_001273953/shn, intron 2 of 7)	2	11198276	11217394	19119	1	NM_134279	-5064	shn	shn
chr2R	11601273	11601725	Filter_SAM_or_BAM__output_SAM_or_BAM_on_data_207__bam_peak_2835	108	.	2.53902	12.5724	10.8021	428	Intron (NM_001273970/tou, intron 1 of 15)	2	11578880	11604936	26057	2	NM_001273970	3211	tou	tou
chr2R	14536606	14536910	Filter_SAM_or_BAM__output_SAM_or_BAM_on_data_207__bam_peak_3210	99	.	2.52182	11.7166	9.97	143	Intron (NM_001274042/ttv, intron 1 of 9)	2	14544150	14546372	2223	2	NM_166059	9462	CG30076	CG30076
chr2R	14534850	14535188	Filter_SAM_or_BAM__output_SAM_or_BAM_on_data_207__bam_peak_3209	355	.	4.32892	37.8849	35.5536	189	Intron (NM_001274042/ttv, intron 1 of 9)	2	14526576	14585321	58746	1	NM_057883	8275	ttv	ttv
chr2R	19315505	19315902	Filter_SAM_or_BAM__output_SAM_or_BAM_on_data_207__bam_peak_3747	288	.	3.26687	31.039	28.8448	100	Intron (NM_001274158/Rgk1, intron 6 of 10)	2	19307447	19310665	3219	2	NM_166340	-4841	EndoB	EndoB
chr2R	19620304	19620513	Filter_SAM_or_BAM__output_SAM_or_BAM_on_data_207__bam_peak_3786	64	.	2.03854	8.04253	6.41135	155	Intron (NM_001274164/sm, intron 2 of 10)	2	19523752	19630397	106646	2	NM_001259498	9884	sm	sm
chr2R	22554169	22554493	Filter_SAM_or_BAM__output_SAM_or_BAM_on_data_207__bam_peak_4040	271	.	4.05944	29.3506	27.1907	114	Intron (NM_001274207/px, intron 3 of 14)	2	22550094	22552113	2020	1	NM_137834	4076	gas	gas
chr2R	22569668	22570163	Filter_SAM_or_BAM__output_SAM_or_BAM_on_data_207__bam_peak_4043	662	.	5.39914	69.2353	66.2683	564	Intron (NM_001274208/dnr1, intron 1 of 3)	2	22562307	22563131	825	1	NM_137835	7362	CG11362	CG11362
chr2R	25215081	25215512	Filter_SAM_or_BAM__output_SAM_or_BAM_on_data_207__bam_peak_4319	418	.	5.52275	44.3291	41.8694	150	Intron (NM_001274250/CG9380, intron 2 of 8)	2	25226611	25229519	2909	1	NM_079143	-11099	Kr	Kr
chr3L	967775	967989	Filter_SAM_or_BAM__output_SAM_or_BAM_on_data_207__bam_peak_4458	184	.	3.41848	20.4207	18.4533	91	Intron (NM_001274306/Glut1, intron 3 of 8)	3	962756	963099	344	1	NR_133148	5020	lncRNA:CR45810	lncRNA:CR45810
chr3L	968235	968563	Filter_SAM_or_BAM__output_SAM_or_BAM_on_data_207__bam_peak_4459	391	.	5.50876	41.518	39.1138	163	Intron (NM_001274306/Glut1, intron 3 of 8)	3	962756	963099	344	1	NR_133148	5480	lncRNA:CR45810	lncRNA:CR45810
chr3L	1083318	1084245	Filter_SAM_or_BAM__output_SAM_or_BAM_on_data_207__bam_peak_4469	241	.	2.64733	26.2836	24.1873	733	Intron (NM_001274310/bab1, intron 1 of 3)	3	1036369	1101089	64721	2	NM_001274310	16844	bab1	bab1
chr3L	1085854	1086013	Filter_SAM_or_BAM__output_SAM_or_BAM_on_data_207__bam_peak_4470	126	.	2.76611	14.456	12.6347	127	Intron (NM_001274310/bab1, intron 1 of 3)	3	1036369	1101089	64721	2	NM_001274310	15076	bab1	bab1
chr3L	1096693	1097024	Filter_SAM_or_BAM__output_SAM_or_BAM_on_data_207__bam_peak_4473	134	.	3.09652	15.287	13.4443	145	Intron (NM_001274310/bab1, intron 1 of 3)	3	1036369	1101089	64721	2	NM_001274310	4065	bab1	bab1
chr3L	2424348	2424680	Filter_SAM_or_BAM__output_SAM_or_BAM_on_data_207__bam_peak_4614	380	.	3.7153	40.4449	38.0622	161	Intron (NM_001274398/Svil, intron 1 of 9)	3	2428910	2464849	35940	1	NM_139464	-4230	Svil	Svil
chr3L	8948133	8948431	Filter_SAM_or_BAM__output_SAM_or_BAM_on_data_207__bam_peak_5242	665	.	5.29997	69.5418	66.5683	272	Intron (NM_001274676/CG43783, intron 3 of 9)	3	8942499	8944893	2395	2	NM_168302	-3241	orb2	orb2
chr3L	10680987	10681282	Filter_SAM_or_BAM__output_SAM_or_BAM_on_data_207__bam_peak_5416	582	.	4.66652	61.0563	58.264	129	Intron (NM_001274755/simj, intron 1 of 8)	3	10691024	10692598	1575	1	NM_140151	-9742	CG11811	CG11811
chr3L	10683135	10683502	Filter_SAM_or_BAM__output_SAM_or_BAM_on_data_207__bam_peak_5419	334	.	4.16978	35.7825	33.4932	187	Intron (NM_001274755/simj, intron 1 of 8)	3	10691024	10692598	1575	1	NM_140151	-7522	CG11811	CG11811
chr3L	14006680	14007139	Filter_SAM_or_BAM__output_SAM_or_BAM_on_data_207__bam_peak_5713	251	.	3.04022	27.2748	25.1573	284	Intron (NM_001274890/upSET, intron 2 of 7)	3	14002127	14020148	18022	1	NM_140424	4554	upSET	upSET
chr3L	14059579	14059648	Filter_SAM_or_BAM__output_SAM_or_BAM_on_data_207__bam_peak_5724	175	.	2.42912	19.5469	17.5998	172	Intron (NM_001274895/Frl, intron 1 of 9)	3	14053100	14054304	1205	2	NR_133236	-5276	asRNA:CR46067	asRNA:CR46067
chr3L	14363494	14363801	Filter_SAM_or_BAM__output_SAM_or_BAM_on_data_207__bam_peak_5749	1035	.	6.4462	107.435	103.572	413	Intron (NM_001274907/fz, intron 4 of 4)	3	14368925	14369707	783	2	NM_001274908	5906	CG13481	CG13481
chr3L	15008281	15008572	Filter_SAM_or_BAM__output_SAM_or_BAM_on_data_207__bam_peak_5801	194	.	3.58366	21.4313	19.4409	106	Intron (NM_001274924/Reck, intron 2 of 7)	3	15001238	15014062	12825	2	NM_001274924	5490	Reck	Reck
chr3L	15010418	15010693	Filter_SAM_or_BAM__output_SAM_or_BAM_on_data_207__bam_peak_5803	311	.	3.82253	33.4406	31.198	318	Intron (NM_001274924/Reck, intron 2 of 7)	3	15001238	15014062	12825	2	NM_001274924	3369	Reck	Reck
chr3L	16698058	16698467	Filter_SAM_or_BAM__output_SAM_or_BAM_on_data_207__bam_peak_5999	403	.	4.54953	42.8154	40.3852	268	Intron (NM_001275037/CG43954, intron 1 of 6)	3	16700829	16701469	641	2	NR_133255	3002	lncRNA:CR45897	lncRNA:CR45897
chr3L	17007137	17007488	Filter_SAM_or_BAM__output_SAM_or_BAM_on_data_207__bam_peak_6055	432	.	4.85161	45.7061	43.2187	211	Intron (NM_001275048/CG3764, intron 1 of 6)	3	16994717	17002360	7644	2	NM_140686	-4778	CG3764	CG3764
chr3L	17665084	17665644	Filter_SAM_or_BAM__output_SAM_or_BAM_on_data_207__bam_peak_6121	499	.	4.38082	52.5266	49.9055	392	Intron (NM_001275068/Crtc, intron 1 of 1)	3	17668588	17668730	143	2	NR_002488	3086	snmRNA:641	snmRNA:641
chr3L	18812220	18812557	Filter_SAM_or_BAM__output_SAM_or_BAM_on_data_207__bam_peak_6253	718	.	5.89592	74.9386	71.8483	201	Intron (NM_001275093/CG14073, intron 2 of 5)	3	18802265	18820675	18411	2	NM_001275093	8118	CG14073	CG14073
chr3L	18813910	18814555	Filter_SAM_or_BAM__output_SAM_or_BAM_on_data_207__bam_peak_6254	558	.	4.51098	58.6277	55.8854	347	Intron (NM_001275093/CG14073, intron 2 of 5)	3	18802265	18820675	18411	2	NM_001275093	6120	CG14073	CG14073
chr3L	19076043	19076330	Filter_SAM_or_BAM__output_SAM_or_BAM_on_data_207__bam_peak_6303	355	.	2.90337	37.8453	35.5146	147	Intron (NM_001275103/Mkp3, intron 1 of 4)	3	19067732	19072396	4665	2	NM_168785	-3648	Mkp3	Mkp3
chr3L	19078999	19079680	Filter_SAM_or_BAM__output_SAM_or_BAM_on_data_207__bam_peak_6305	713	.	3.48333	74.3919	71.3136	309	Intron (NM_001275103/Mkp3, intron 1 of 4)	3	19067732	19072396	4665	2	NM_168785	-6604	Mkp3	Mkp3
chr3L	19079735	19079822	Filter_SAM_or_BAM__output_SAM_or_BAM_on_data_207__bam_peak_6306	309	.	2.48258	33.1865	30.9488	265	Intron (NM_001275103/Mkp3, intron 1 of 4)	3	19066155	19086426	20272	2	NM_001275103	6604	Mkp3	Mkp3
chr3L	19081434	19081740	Filter_SAM_or_BAM__output_SAM_or_BAM_on_data_207__bam_peak_6307	424	.	3.32182	44.8892	42.4179	188	Intron (NM_001275103/Mkp3, intron 1 of 4)	3	19066155	19086426	20272	2	NM_001275103	4686	Mkp3	Mkp3
chr3L	21164347	21164547	Filter_SAM_or_BAM__output_SAM_or_BAM_on_data_207__bam_peak_6515	95	.	2.46245	11.2436	9.51126	151	Intron (NM_001275209/Ac78C, intron 1 of 23)	3	21136447	21171930	35484	2	NM_001275209	7383	Ac78C	Ac78C
chr3L	21604361	21604714	Filter_SAM_or_BAM__output_SAM_or_BAM_on_data_207__bam_peak_6578	167	.	2.65514	18.6721	16.7454	103	Intron (NM_001275248/TfAP-2, intron 1 of 7)	3	21608123	21613349	5227	1	NM_001275250	-3409	TfAP-2	TfAP-2
chr3R	9212600	9212872	Filter_SAM_or_BAM__output_SAM_or_BAM_on_data_207__bam_peak_7201	102	.	2.90945	11.9832	10.2288	146	Intron (NM_001275474/pum, intron 8 of 12)	4	9067578	9226840	159263	2	NM_169260	13968	pum	pum
chr3R	9120883	9121348	Filter_SAM_or_BAM__output_SAM_or_BAM_on_data_207__bam_peak_7196	1032	.	5.82619	107.085	103.23	284	Intron (NM_001275475/pum, intron 1 of 5)	4	9066343	9157950	91608	2	NM_001275475	36602	pum	pum
chr3R	9122867	9123112	Filter_SAM_or_BAM__output_SAM_or_BAM_on_data_207__bam_peak_7197	170	.	2.54441	18.9517	17.0186	155	Intron (NM_001275475/pum, intron 1 of 5)	4	9066343	9157950	91608	2	NM_001275475	34838	pum	pum
chr3R	9128989	9129599	Filter_SAM_or_BAM__output_SAM_or_BAM_on_data_207__bam_peak_7198	253	.	3.14903	27.4645	25.3435	435	Intron (NM_001275475/pum, intron 1 of 5)	4	9066343	9157950	91608	2	NM_001275475	28351	pum	pum
chr3R	11613210	11613636	Filter_SAM_or_BAM__output_SAM_or_BAM_on_data_207__bam_peak_7456	503	.	3.60973	52.9704	50.3402	369	Intron (NM_001275546/Jupiter, intron 1 of 2)	4	11590386	11619906	29521	2	NM_001275546	6270	Jupiter	Jupiter
chr3R	20546684	20547139	Filter_SAM_or_BAM__output_SAM_or_BAM_on_data_207__bam_peak_8310	708	.	4.79804	73.9654	70.8967	225	Intron (NM_001275828/Stat92E, intron 1 of 7)	4	20535693	20551107	15415	2	NM_001014643	3968	Stat92E	Stat92E
chr3R	20765534	20765597	Filter_SAM_or_BAM__output_SAM_or_BAM_on_data_207__bam_peak_8333	289	.	3.25894	31.1498	28.9535	171	Intron (NM_001275847/Syp, intron 1 of 12)	4	20757269	20762369	5101	2	NM_169923	-3166	CG31195	CG31195
chr3R	20765815	20766292	Filter_SAM_or_BAM__output_SAM_or_BAM_on_data_207__bam_peak_8334	872	.	5.25201	90.7569	87.2968	335	Intron (NM_001275847/Syp, intron 1 of 12)	4	20757269	20762369	5101	2	NM_169923	-3447	CG31195	CG31195
chr3R	20961120	20961479	Filter_SAM_or_BAM__output_SAM_or_BAM_on_data_207__bam_peak_8363	320	.	3.145	34.31	32.05	173	Intron (NM_001275861/Atpalpha, intron 2 of 9)	4	20957734	20975284	17551	1	NM_206528	3387	Atpalpha	Atpalpha
chrX	8111123	8111281	Filter_SAM_or_BAM__output_SAM_or_BAM_on_data_207__bam_peak_10345	106	.	3.01711	12.4333	10.6662	98	Intron (NM_001298072/Gclc, intron 1 of 4)	6	8102582	8107814	5233	2	NM_001298073	-3310	Gclc	Gclc
chrX	9470105	9470464	Filter_SAM_or_BAM__output_SAM_or_BAM_on_data_207__bam_peak_10476	407	.	3.7491	43.2037	40.7661	436	Intron (NM_001298124/mgl, intron 2 of 14)	6	9445815	9446212	398	2	NM_001298127	-23894	CG44815	CG44815
chrX	11427190	11427530	Filter_SAM_or_BAM__output_SAM_or_BAM_on_data_207__bam_peak_10614	249	.	4.39588	27.0714	24.9581	229	Intron (NM_001298192/Gs2, intron 2 of 4)	6	11423957	11430197	6241	1	NM_206685	3234	Gs2	Gs2
chrX	14759692	14759971	Filter_SAM_or_BAM__output_SAM_or_BAM_on_data_207__bam_peak_10908	90	.	3.14913	10.7346	9.0163	155	Intron (NM_001298316/CG15890, intron 2 of 4)	6	14757531	14765787	8257	2	NM_001298316	5816	CG15890	CG15890
chr2L	5292398	5293196	Filter_SAM_or_BAM__output_SAM_or_BAM_on_data_207__bam_peak_549	573	.	4.66933	60.1069	57.3345	345	Intron (NM_001298694/vri, intron 1 of 2)	1	5288944	5310996	22053	1	NM_001298694	3455	vri	vri
chr2L	8718013	8718579	Filter_SAM_or_BAM__output_SAM_or_BAM_on_data_207__bam_peak_941	404	.	4.07964	42.8769	40.4455	367	Intron (NM_001298831/raw, intron 1 of 8)	1	8709880	8714583	4704	2	NM_001298830	-3431	raw	raw
chr2L	16279904	16280254	Filter_SAM_or_BAM__output_SAM_or_BAM_on_data_207__bam_peak_1572	318	.	3.05835	34.1253	31.8689	145	Intron (NM_001299047/crp, intron 1 of 2)	1	16263556	16287730	24175	2	NM_001299047	7476	crp	crp
chr2L	16267895	16268374	Filter_SAM_or_BAM__output_SAM_or_BAM_on_data_207__bam_peak_1563	775	.	4.17878	80.7951	77.5715	522	Intron (NM_001299047/crp, intron 2 of 2)	1	16262141	16263483	1343	1	NM_135938	5755	CG4935	CG4935
chr2L	16269269	16269935	Filter_SAM_or_BAM__output_SAM_or_BAM_on_data_207__bam_peak_1564	1176	.	5.56475	121.877	117.671	630	Intron (NM_001299047/crp, intron 2 of 2)	1	16262141	16263483	1343	1	NM_135938	7129	CG4935	CG4935
chr2L	16271252	16271889	Filter_SAM_or_BAM__output_SAM_or_BAM_on_data_207__bam_peak_1566	679	.	5.09786	70.972	67.9677	447	Intron (NM_001299047/crp, intron 2 of 2)	1	16262141	16263483	1343	1	NM_135938	9112	CG4935	CG4935
chr2L	18576289	18576614	Filter_SAM_or_BAM__output_SAM_or_BAM_on_data_207__bam_peak_1745	430	.	3.66819	45.5602	43.0754	168	Intron (NM_001299116/Pde11, intron 2 of 17)	1	18532728	18572286	39559	2	NM_001103707	-4004	Pde11	Pde11
chr2L	18981836	18982272	Filter_SAM_or_BAM__output_SAM_or_BAM_on_data_207__bam_peak_1791	871	.	5.28723	90.5868	87.1306	348	Intron (NM_001299150/Swip-1, intron 1 of 1)	1	18977519	18987280	9762	2	NM_001299150	5008	Swip-1	Swip-1
chr2R	19191606	19192293	Filter_SAM_or_BAM__output_SAM_or_BAM_on_data_207__bam_peak_3734	657	.	4.80512	68.6556	65.7016	458	Intron (NM_001299675/hppy, intron 2 of 15)	2	19178738	19227193	48456	1	NM_166335	12869	hppy	hppy
chr2R	21134397	21135181	Filter_SAM_or_BAM__output_SAM_or_BAM_on_data_207__bam_peak_3892	738	.	3.8515	76.9563	73.82	488	Intron (NM_001299733/Magi, intron 2 of 5)	2	21129463	21139795	10333	2	NM_001299733	4614	Magi	Magi
chr2R	24552740	24552985	Filter_SAM_or_BAM__output_SAM_or_BAM_on_data_207__bam_peak_4240	110	.	2.27436	12.8467	11.0686	212	Intron (NM_001299916/ITP, intron 1 of 2)	2	24533374	24556300	22927	2	NM_001038882	3315	CG4622	CG4622
chr2R	25115424	25115727	Filter_SAM_or_BAM__output_SAM_or_BAM_on_data_207__bam_peak_4313	880	.	8.20242	91.4859	88.0087	170	Intron (NM_001299947/lov, intron 2 of 4)	2	25129432	25129985	554	1	NM_166706	-13705	CG30430	CG30430
chr3R	14649401	14649797	Filter_SAM_or_BAM__output_SAM_or_BAM_on_data_207__bam_peak_7756	345	.	3.82326	36.87	34.5585	131	Intron (NM_001300399/l(3)L1231, intron 1 of 5)	4	14642672	14655197	12526	2	NM_001300399	5400	l(3)L1231	l(3)L1231
chr3R	14711999	14712040	Filter_SAM_or_BAM__output_SAM_or_BAM_on_data_207__bam_peak_7765	104	.	2.54379	12.1795	10.42	130	Intron (NM_001300400/kibra, intron 1 of 8)	4	14697689	14724261	26573	2	NM_001300400	12221	kibra	kibra
chr3R	14714280	14714555	Filter_SAM_or_BAM__output_SAM_or_BAM_on_data_207__bam_peak_7766	240	.	3.80464	26.1839	24.0894	129	Intron (NM_001300400/kibra, intron 1 of 8)	4	14697689	14724261	26573	2	NM_001300400	9706	kibra	kibra
chr3R	16353647	16353928	Filter_SAM_or_BAM__output_SAM_or_BAM_on_data_207__bam_peak_7962	259	.	3.84592	28.112	25.9779	165	Intron (NM_001300435/CG10311, intron 1 of 3)	4	16350786	16357015	6230	2	NM_001300435	3087	CG10311	CG10311
chr3R	19220058	19220380	Filter_SAM_or_BAM__output_SAM_or_BAM_on_data_207__bam_peak_8212	135	.	2.72112	15.3867	13.5408	150	Intron (NM_001300473/vib, intron 2 of 8)	4	19215434	19226558	11125	2	NM_001300473	6178	vib	vib
chr3R	19831279	19831504	Filter_SAM_or_BAM__output_SAM_or_BAM_on_data_207__bam_peak_8256	60	.	2.01099	7.7161	6.09575	75	Intron (NM_001300482/bnl, intron 1 of 5)	4	19794075	19836817	42743	2	NM_001300482	5313	bnl	bnl
chr3R	19802558	19802829	Filter_SAM_or_BAM__output_SAM_or_BAM_on_data_207__bam_peak_8251	49	.	2.05853	6.54125	4.96331	125	Intron (NM_001300482/bnl, intron 2 of 5)	4	19783522	19785519	1998	1	NM_142575	19037	CG11453	CG11453
chr3R	20464203	20464819	Filter_SAM_or_BAM__output_SAM_or_BAM_on_data_207__bam_peak_8307	514	.	4.90216	54.134	51.4817	232	Intron (NM_001300495/Gfrl, intron 3 of 20)	4	20378996	20449687	70692	2	NM_001300494	-14517	Gfrl	Gfrl
chr3R	21256386	21256590	Filter_SAM_or_BAM__output_SAM_or_BAM_on_data_207__bam_peak_8419	84	.	2.94967	10.1799	8.47883	163	Intron (NM_001300510/ETHR, intron 1 of 4)	4	21247011	21265134	18124	1	NM_206533	9376	ETHR	ETHR
chr3R	21656477	21656712	Filter_SAM_or_BAM__output_SAM_or_BAM_on_data_207__bam_peak_8480	149	.	2.76933	16.8219	14.9399	47	Intron (NM_001300526/E2f1, intron 1 of 7)	4	21621368	21660432	39065	2	NM_169961	3720	E2f1	E2f1
chr3R	21652722	21653135	Filter_SAM_or_BAM__output_SAM_or_BAM_on_data_207__bam_peak_8477	476	.	3.30596	50.249	47.6719	186	Intron (NM_001300526/E2f1, intron 1 of 7)	4	21646301	21646603	303	1	NR_133433	6422	lncRNA:CR46057	lncRNA:CR46057
chr3R	21651400	21652105	Filter_SAM_or_BAM__output_SAM_or_BAM_on_data_207__bam_peak_8476	903	.	5.86858	93.8633	90.3298	739	Intron (NM_001300526/E2f1, intron 1 of 7)	4	21646301	21646603	303	1	NR_133433	5100	lncRNA:CR46057	lncRNA:CR46057
chr3R	27056201	27056560	Filter_SAM_or_BAM__output_SAM_or_BAM_on_data_207__bam_peak_9042	138	.	2.80927	15.6628	13.8101	220	Intron (NM_001300624/RYa-R, intron 4 of 5)	4	27062216	27063059	844	1	NM_001104471	-5656	CG34292	CG34292
chr2R	14484923	14485053	Filter_SAM_or_BAM__output_SAM_or_BAM_on_data_207__bam_peak_3203	356	.	3.66517	38.0282	35.6942	623	Intron (NM_001316420/PRAS40, intron 1 of 3)	2	14481187	14497312	16126	1	NM_001316420	3737	PRAS40	PRAS40
chr3L	22733664	22733992	Filter_SAM_or_BAM__output_SAM_or_BAM_on_data_207__bam_peak_6657	387	.	3.34645	41.1377	38.7416	219	Intron (NM_001316460/CG11241, intron 3 of 3)	3	22729766	22731600	1835	1	NM_168959	3899	CG32454	CG32454
chr3R	14070837	14071109	Filter_SAM_or_BAM__output_SAM_or_BAM_on_data_207__bam_peak_7687	126	.	2.56966	14.4458	12.6246	144	Intron (NM_001316497/foxo, intron 4 of 10)	4	14057919	14087978	30060	1	NM_001275628	12919	foxo	foxo
chr3R	14076379	14076804	Filter_SAM_or_BAM__output_SAM_or_BAM_on_data_207__bam_peak_7688	423	.	3.73481	44.7915	42.3227	186	Intron (NM_001316497/foxo, intron 4 of 10)	4	14089517	14092425	2909	1	NM_142074	-12713	Npc2b	Npc2b
chr3R	2086025	2086250	Filter_SAM_or_BAM__output_SAM_or_BAM_on_data_207__bam_peak_6717	89	.	1.63698	10.6734	8.95755	48	Intron (NM_001316563/Myo81F, intron 16 of 21)	4	1865108	1866008	901	2	NR_133318	-220018	lncRNA:CR46122	lncRNA:CR46122
chr3R	2087438	2087699	Filter_SAM_or_BAM__output_SAM_or_BAM_on_data_207__bam_peak_6718	62	.	1.44212	7.89293	6.26552	41	Intron (NM_001316563/Myo81F, intron 16 of 21)	4	1865108	1866008	901	2	NR_133318	-221431	lncRNA:CR46122	lncRNA:CR46122
chr3R	2088171	2088664	Filter_SAM_or_BAM__output_SAM_or_BAM_on_data_207__bam_peak_6719	135	.	1.77716	15.3872	13.5413	299	Intron (NM_001316563/Myo81F, intron 16 of 21)	4	1865108	1866008	901	2	NR_133318	-222164	lncRNA:CR46122	lncRNA:CR46122
chr2R	10130515	10130648	Filter_SAM_or_BAM__output_SAM_or_BAM_on_data_207__bam_peak_2659	320	.	3.737	34.3377	32.0773	218	Intron (NM_001347799/CG46319, intron 3 of 11)	2	10125912	10137472	11561	1	NM_165748	4604	gem	gem
chr3L	22634133	22634489	Filter_SAM_or_BAM__output_SAM_or_BAM_on_data_207__bam_peak_6650	819	.	5.62476	85.2667	81.9398	126	Intron (NM_001369979/CG14459, intron 1 of 4)	3	22573114	22637916	64803	2	NM_001369979	3427	CG14459	CG14459
chr2R	7774784	7775019	Filter_SAM_or_BAM__output_SAM_or_BAM_on_data_207__bam_peak_2356	71	.	1.93094	8.7596	7.10277	122	Intron (NM_001370031/CG46385, intron 2 of 2)	2	7739114	7782637	43524	2	NM_001370031	7618	CG46385	CG46385
chr2R	7751592	7751646	Filter_SAM_or_BAM__output_SAM_or_BAM_on_data_207__bam_peak_2349	39	.	2.34354	5.43855	3.90517	37	Intron (NM_001370032/CG46385, intron 1 of 1)	2	7737019	7745297	8279	2	NM_001273862	-6296	CG46385	CG46385
chr3R	10535710	10536139	Filter_SAM_or_BAM__output_SAM_or_BAM_on_data_207__bam_peak_7373	830	.	7.89686	86.3958	83.0409	313	Intron (NM_057228/hth, intron 8 of 13)	4	10513005	10513133	129	2	NR_048368	-22578	mir-4944	mir-4944
chr3R	6708930	6709165	Filter_SAM_or_BAM__output_SAM_or_BAM_on_data_207__bam_peak_6968	151	.	3.50557	17.0626	15.1748	90	Intron (NM_057321/pb, intron 8 of 8)	4	6704084	6704903	820	1	NM_141426	4847	Ccp84Aa	Ccp84Aa
chrX	2651311	2651548	Filter_SAM_or_BAM__output_SAM_or_BAM_on_data_207__bam_peak_9845	104	.	3.32601	12.1965	10.4366	166	Intron (NM_057367/sgg, intron 2 of 9)	6	2646637	2677846	31210	1	NM_001272264	4675	sgg	sgg
chr3R	14282724	14283008	Filter_SAM_or_BAM__output_SAM_or_BAM_on_data_207__bam_peak_7698	402	.	4.37881	42.6609	40.2343	117	Intron (NM_057421/trx, intron 1 of 7)	4	14263359	14286903	23545	2	NM_057421	3895	trx	trx
chr2L	21250389	21251330	Filter_SAM_or_BAM__output_SAM_or_BAM_on_data_207__bam_peak_2016	1138	.	5.21142	117.962	113.851	379	Intron (NM_057585/Hr39, intron 2 of 4)	1	21261168	21262287	1120	1	NM_136258	-9838	l(2)k14505	l(2)k14505
chr2L	16315016	16315181	Filter_SAM_or_BAM__output_SAM_or_BAM_on_data_207__bam_peak_1583	179	.	3.0394	19.9267	17.9705	177	Intron (NM_057594/cact, intron 4 of 6)	1	16310956	16313097	2142	1	NM_058153	4061	fzy	fzy
chr2L	19141175	19141850	Filter_SAM_or_BAM__output_SAM_or_BAM_on_data_207__bam_peak_1809	720	.	4.99361	75.196	72.0998	746	Intron (NM_057597/brat, intron 1 of 3)	1	19133023	19135233	2211	2	NM_001273634	-5943	l(2)37Cg	l(2)37Cg
chr2L	19140661	19141124	Filter_SAM_or_BAM__output_SAM_or_BAM_on_data_207__bam_peak_1809	720	.	4.99361	75.196	72.0998	746	Intron (NM_057597/brat, intron 1 of 3)	1	19133023	19135233	2211	2	NM_001273634	-5429	l(2)37Cg	l(2)37Cg
chr2L	3131684	3131991	Filter_SAM_or_BAM__output_SAM_or_BAM_on_data_207__bam_peak_343	254	.	3.31971	27.5569	25.4338	171	Intron (NM_057805/toc, intron 1 of 10)	1	3128635	3129489	855	1	NM_134905	3050	CG15403	CG15403
chr2R	9430635	9430992	Filter_SAM_or_BAM__output_SAM_or_BAM_on_data_207__bam_peak_2552	304	.	3.00274	32.6487	30.422	183	Intron (NM_057867/Pdk, intron 1 of 4)	2	9426439	9434638	8200	1	NM_001273896	4197	Pdk	Pdk
chr2L	6085614	6086140	Filter_SAM_or_BAM__output_SAM_or_BAM_on_data_207__bam_peak_621	521	.	4.02295	54.7711	52.1065	363	Intron (NM_058119/Kr-h1, intron 1 of 3)	1	6082603	6096498	13896	1	NM_058119	3012	Kr-h1	Kr-h1
chr2R	10601976	10602352	Filter_SAM_or_BAM__output_SAM_or_BAM_on_data_207__bam_peak_2717	78	.	2.32184	9.50248	7.82218	298	Intron (NM_078962/psq, intron 3 of 9)	2	10617662	10640990	23329	1	NM_136754	-15310	CG11883	CG11883
chr2R	10564067	10564763	Filter_SAM_or_BAM__output_SAM_or_BAM_on_data_207__bam_peak_2713	772	.	5.30553	80.4338	77.2185	940	Intron (NM_078962/psq, intron 3 of 9)	2	10568942	10616248	47307	1	NM_165792	-4179	psq	psq
chr2R	17436302	17436525	Filter_SAM_or_BAM__output_SAM_or_BAM_on_data_207__bam_peak_3523	86	.	2.69893	10.3738	8.66625	102	Intron (NM_079046/EDTP, intron 1 of 5)	2	17440297	17442483	2187	1	NM_137367	-3772	CG18467	CG18467
chr2R	18668806	18668905	Filter_SAM_or_BAM__output_SAM_or_BAM_on_data_207__bam_peak_3672	232	.	3.48276	25.3645	23.2876	353	Intron (NM_079062/edl, intron 1 of 1)	2	18664683	18665792	1110	2	NM_176224	-3015	CG33136	CG33136
chr3L	18172413	18172619	Filter_SAM_or_BAM__output_SAM_or_BAM_on_data_207__bam_peak_6201	57	.	2.06032	7.3936	5.78448	118	Intron (NM_079412/hid, intron 2 of 3)	3	18154897	18162522	7626	2	NM_140776	-9892	CG13699	CG13699
chr3L	18170855	18171380	Filter_SAM_or_BAM__output_SAM_or_BAM_on_data_207__bam_peak_6199	344	.	4.33334	36.7095	34.4014	366	Intron (NM_079412/hid, intron 3 of 3)	3	18154897	18162522	7626	2	NM_140776	-8334	CG13699	CG13699
chr3L	18171499	18171724	Filter_SAM_or_BAM__output_SAM_or_BAM_on_data_207__bam_peak_6200	207	.	3.29483	22.7205	20.7012	150	Intron (NM_079412/hid, intron 3 of 3)	3	18154897	18162522	7626	2	NM_140776	-8978	CG13699	CG13699
chr3L	18771372	18771986	Filter_SAM_or_BAM__output_SAM_or_BAM_on_data_207__bam_peak_6244	542	.	5.27746	57.0049	54.2953	409	Intron (NM_079419/ftz-f1, intron 2 of 9)	3	18750607	18765744	15138	2	NM_001316437	-5629	ftz-f1	ftz-f1
chr3L	18781773	18782064	Filter_SAM_or_BAM__output_SAM_or_BAM_on_data_207__bam_peak_6246	665	.	7.7045	69.5424	66.569	174	Intron (NM_079419/ftz-f1, intron 2 of 9)	3	18750607	18765744	15138	2	NM_001316437	-16030	ftz-f1	ftz-f1
chr3L	18786455	18786819	Filter_SAM_or_BAM__output_SAM_or_BAM_on_data_207__bam_peak_6248	195	.	3.50394	21.5464	19.5535	202	Intron (NM_079419/ftz-f1, intron 2 of 9)	3	18751749	18801309	49561	2	NM_079419	14490	ftz-f1	ftz-f1
chr3L	18791229	18791687	Filter_SAM_or_BAM__output_SAM_or_BAM_on_data_207__bam_peak_6249	1071	.	8.53746	111.143	107.187	442	Intron (NM_079419/ftz-f1, intron 2 of 9)	3	18751749	18801309	49561	2	NM_079419	9622	ftz-f1	ftz-f1
chr3L	22401602	22401810	Filter_SAM_or_BAM__output_SAM_or_BAM_on_data_207__bam_peak_6640	1026	.	5.55494	106.501	102.661	181	Intron (NM_079491/Ten-m, intron 1 of 8)	3	22348168	22407547	59380	2	NR_133305	5737	lncRNA:CR45962	lncRNA:CR45962
chr3R	8119226	8119254	Filter_SAM_or_BAM__output_SAM_or_BAM_on_data_207__bam_peak_7084	380	.	3.41472	40.4394	38.0569	298	Intron (NM_079549/puc, intron 3 of 3)	4	8122725	8125273	2549	1	NM_141510	-3471	CG7878	CG7878
chr3R	8119376	8119526	Filter_SAM_or_BAM__output_SAM_or_BAM_on_data_207__bam_peak_7085	1476	.	7.70518	152.606	147.602	562	Intron (NM_079549/puc, intron 3 of 3)	4	8122725	8125273	2549	1	NM_141510	-3199	CG7878	CG7878
chr3R	8117343	8117679	Filter_SAM_or_BAM__output_SAM_or_BAM_on_data_207__bam_peak_7083	49	.	1.88341	6.54818	4.96999	107	Intron (NM_079549/puc, intron 3 of 3)	4	8112699	8114003	1305	2	NR_125107	-3341	lncRNA:CR44331	lncRNA:CR44331
chr3R	10356237	10356828	Filter_SAM_or_BAM__output_SAM_or_BAM_on_data_207__bam_peak_7357	694	.	4.2489	72.505	69.4675	318	Intron (NM_079578/jumu, intron 1 of 2)	4	10350182	10361612	11431	1	NM_079578	6056	jumu	jumu
chr3R	17108947	17109190	Filter_SAM_or_BAM__output_SAM_or_BAM_on_data_207__bam_peak_8016	526	.	4.57587	55.3214	52.6454	62	Intron (NM_079659/cher, intron 4 of 15)	4	17091533	17119082	27550	2	NM_079659	9892	cher	cher
chr3R	18474212	18474979	Filter_SAM_or_BAM__output_SAM_or_BAM_on_data_207__bam_peak_8135	758	.	7.13371	79.0352	75.851	190	Intron (NM_079673/fru, intron 2 of 7)	4	18418716	18480676	61961	2	NM_206514	5697	fru	fru
chr3R	18483984	18484264	Filter_SAM_or_BAM__output_SAM_or_BAM_on_data_207__bam_peak_8141	327	.	4.98823	34.998	32.724	255	Intron (NM_079673/fru, intron 2 of 7)	4	18418716	18480676	61961	2	NM_206514	-3309	fru	fru
chr3R	21605607	21605760	Filter_SAM_or_BAM__output_SAM_or_BAM_on_data_207__bam_peak_8456	515	.	5.46142	54.2426	51.5879	155	Intron (NM_079712/InR, intron 1 of 12)	4	21615020	21615740	721	2	NR_074040	9980	lncRNA:CR44034	lncRNA:CR44034
chr3R	21606710	21606926	Filter_SAM_or_BAM__output_SAM_or_BAM_on_data_207__bam_peak_8457	262	.	4.50716	28.4263	26.2853	110	Intron (NM_079712/InR, intron 1 of 12)	4	21615020	21615740	721	2	NR_074040	8814	lncRNA:CR44034	lncRNA:CR44034
chr3R	21605378	21605454	Filter_SAM_or_BAM__output_SAM_or_BAM_on_data_207__bam_peak_8455	180	.	3.20937	20.0414	18.0827	181	Intron (NM_079712/InR, intron 1 of 12)	4	21615020	21615740	721	2	NR_074040	10286	lncRNA:CR44034	lncRNA:CR44034
chr3R	23325955	23327126	Filter_SAM_or_BAM__output_SAM_or_BAM_on_data_207__bam_peak_8659	960	.	4.63096	99.6967	96.024	771	Intron (NM_079737/pnt, intron 3 of 8)	4	23333504	23333803	300	2	NR_133438	6677	lncRNA:CR46090	lncRNA:CR46090
chr3R	23305034	23305338	Filter_SAM_or_BAM__output_SAM_or_BAM_on_data_207__bam_peak_8651	52	.	2.1069	6.865	5.27445	253	Intron (NM_079737/pnt, intron 6 of 8)	4	23290944	23314315	23372	2	NM_170651	8977	pnt	pnt
chr3R	23308887	23309091	Filter_SAM_or_BAM__output_SAM_or_BAM_on_data_207__bam_peak_8653	120	.	2.45183	13.8513	12.046	162	Intron (NM_079737/pnt, intron 6 of 8)	4	23290944	23314315	23372	2	NM_170651	5224	pnt	pnt
chr3R	24014183	24014699	Filter_SAM_or_BAM__output_SAM_or_BAM_on_data_207__bam_peak_8739	896	.	4.8994	93.1367	89.6206	313	Intron (NM_079749/KrT95D, intron 1 of 10)	4	23998440	24006578	8139	2	NM_170109	-7606	KrT95D	KrT95D
chr3R	24021938	24022244	Filter_SAM_or_BAM__output_SAM_or_BAM_on_data_207__bam_peak_8742	978	.	5.02636	101.531	97.8139	367	Intron (NM_079749/KrT95D, intron 1 of 10)	4	23997538	24031827	34290	2	NM_079749	9583	KrT95D	KrT95D
chr3R	26896115	26896581	Filter_SAM_or_BAM__output_SAM_or_BAM_on_data_207__bam_peak_9024	747	.	4.65459	77.9432	74.7843	815	Intron (NM_079798/T48, intron 2 of 2)	4	26881734	26910997	29264	1	NM_001276070	14382	T48	T48
chr3R	30282787	30282930	Filter_SAM_or_BAM__output_SAM_or_BAM_on_data_207__bam_peak_9331	169	.	2.62248	18.8976	16.9657	144	Intron (NM_079853/hdc, intron 1 of 5)	4	30277932	30372382	94451	1	NM_001276174	4856	hdc	hdc
chr3R	30338678	30338790	Filter_SAM_or_BAM__output_SAM_or_BAM_on_data_207__bam_peak_9337	87	.	2.83576	10.4895	8.77869	49	Intron (NM_079853/hdc, intron 2 of 5)	4	30357860	30362093	4234	1	NM_170478	-19070	hdc	hdc
chr2L	3348232	3348389	Filter_SAM_or_BAM__output_SAM_or_BAM_on_data_207__bam_peak_355	95	.	2.61616	11.2438	9.5114	162	Intron (NM_079909/E23, intron 2 of 8)	1	3334875	3354829	19955	2	NM_079909	6440	E23	E23
chr2R	10528469	10528799	Filter_SAM_or_BAM__output_SAM_or_BAM_on_data_207__bam_peak_2696	807	.	5.22086	84.0006	80.7035	465	Intron (NM_080027/lola, intron 5 of 5)	2	10504859	10534354	29496	2	NM_170619	5555	lola	lola
chr2R	10530445	10531004	Filter_SAM_or_BAM__output_SAM_or_BAM_on_data_207__bam_peak_2697	883	.	5.20617	91.838	88.354	371	Intron (NM_080027/lola, intron 5 of 5)	2	10504859	10534354	29496	2	NM_170619	3350	lola	lola
chr3L	1376007	1376302	Filter_SAM_or_BAM__output_SAM_or_BAM_on_data_207__bam_peak_4509	321	.	3.83537	34.3667	32.105	113	Intron (NM_080051/ru, intron 1 of 3)	3	1370628	1387437	16810	1	NM_080051	5380	ru	ru
chr3L	7836960	7837466	Filter_SAM_or_BAM__output_SAM_or_BAM_on_data_207__bam_peak_5098	103	.	2.37531	12.0626	10.306	260	Intron (NM_080093/Pdp1, intron 2 of 5)	3	7814337	7833073	18737	2	NM_168238	-3888	Pdp1	Pdp1
chr3R	16254581	16255535	Filter_SAM_or_BAM__output_SAM_or_BAM_on_data_207__bam_peak_7941	406	.	4.19374	43.0489	40.6141	253	Intron (NM_080255/tara, intron 1 of 1)	4	16261355	16264095	2741	2	NM_080257	8560	bor	bor
chr3R	16256053	16256344	Filter_SAM_or_BAM__output_SAM_or_BAM_on_data_207__bam_peak_7942	184	.	3.51458	20.4424	18.4745	155	Intron (NM_080255/tara, intron 1 of 1)	4	16261355	16264095	2741	2	NM_080257	7751	bor	bor
chr3R	16231561	16231882	Filter_SAM_or_BAM__output_SAM_or_BAM_on_data_207__bam_peak_7933	350	.	4.43682	37.3331	35.0127	137	Intron (NM_080255/tara, intron 1 of 1)	4	16225651	16260329	34679	1	NM_080255	5911	tara	tara
chr3R	16234202	16234746	Filter_SAM_or_BAM__output_SAM_or_BAM_on_data_207__bam_peak_7934	714	.	5.93741	74.5714	71.4897	1339	Intron (NM_080255/tara, intron 1 of 1)	4	16242816	16260329	17514	1	NM_169709	-8070	tara	tara
chr3R	16235056	16236014	Filter_SAM_or_BAM__output_SAM_or_BAM_on_data_207__bam_peak_7934	714	.	5.93741	74.5714	71.4897	1339	Intron (NM_080255/tara, intron 1 of 1)	4	16242816	16260329	17514	1	NM_169709	-6802	tara	tara
chr3R	16237009	16238027	Filter_SAM_or_BAM__output_SAM_or_BAM_on_data_207__bam_peak_7935	1013	.	7.02355	105.149	101.34	823	Intron (NM_080255/tara, intron 1 of 1)	4	16242816	16260329	17514	1	NM_169709	-4789	tara	tara
chr3R	16236325	16236784	Filter_SAM_or_BAM__output_SAM_or_BAM_on_data_207__bam_peak_7935	1013	.	7.02355	105.149	101.34	823	Intron (NM_080255/tara, intron 1 of 1)	4	16242816	16260329	17514	1	NM_169709	-6032	tara	tara
chr3R	16249344	16250921	Filter_SAM_or_BAM__output_SAM_or_BAM_on_data_207__bam_peak_7940	943	.	4.93596	97.9984	94.3679	964	Intron (NM_080255/tara, intron 1 of 1)	4	16242816	16260329	17514	1	NM_169709	6529	tara	tara
chr2L	11061040	11061575	Filter_SAM_or_BAM__output_SAM_or_BAM_on_data_207__bam_peak_1185	206	.	3.33216	22.6226	20.6052	479	Intron (NM_080362/Samuel, intron 1 of 6)	1	11028784	11057464	28681	2	NM_001273444	-3577	Samuel	Samuel
chr2R	13995379	13996306	Filter_SAM_or_BAM__output_SAM_or_BAM_on_data_207__bam_peak_3136	730	.	4.12258	76.1286	73.0111	470	Intron (NM_080376/mam, intron 2 of 6)	2	13991203	14058697	67495	1	NM_080376	4177	mam	mam
chr2R	14000657	14001150	Filter_SAM_or_BAM__output_SAM_or_BAM_on_data_207__bam_peak_3137	460	.	4.14742	48.5991	46.0545	303	Intron (NM_080376/mam, intron 2 of 6)	2	14005860	14006006	147	2	NR_048105	4856	mir-4978	mir-4978
chr2R	14024681	14024911	Filter_SAM_or_BAM__output_SAM_or_BAM_on_data_207__bam_peak_3145	716	.	6.19484	74.7657	71.6796	199	Intron (NM_080376/mam, intron 3 of 6)	2	14028620	14029096	477	1	NM_137079	-3709	CG18371	CG18371
chr2R	14012201	14012543	Filter_SAM_or_BAM__output_SAM_or_BAM_on_data_207__bam_peak_3142	37	.	1.79666	5.29851	3.7717	210	Intron (NM_080376/mam, intron 3 of 6)	2	14009199	14060356	51158	1	NM_166030	3003	mam	mam
chr2R	14037415	14037855	Filter_SAM_or_BAM__output_SAM_or_BAM_on_data_207__bam_peak_3152	563	.	4.1178	59.1126	56.3608	326	Intron (NM_080376/mam, intron 3 of 6)	2	14031663	14058882	27220	1	NM_206109	5753	mam	mam
chr2R	14018330	14018720	Filter_SAM_or_BAM__output_SAM_or_BAM_on_data_207__bam_peak_3143	272	.	3.44386	29.3823	27.2214	152	Intron (NM_080376/mam, intron 3 of 6)	2	14009199	14060356	51158	1	NM_166030	9132	mam	mam
chr3R	16702795	16703305	Filter_SAM_or_BAM__output_SAM_or_BAM_on_data_207__bam_peak_7986	1498	.	13.6039	154.925	149.862	324	Intron (NM_080504/Ubx, intron 3 of 3)	4	16656623	16734426	77804	2	NM_080504	31121	Ubx	Ubx
chrX	7162250	7162498	Filter_SAM_or_BAM__output_SAM_or_BAM_on_data_207__bam_peak_10251	271	.	4.75512	29.3517	27.1917	93	Intron (NM_132157/CG9650, intron 1 of 4)	6	7145600	7149850	4251	2	NR_002102	-12401	lncRNA:CR32730	lncRNA:CR32730
chrX	13890497	13890502	Filter_SAM_or_BAM__output_SAM_or_BAM_on_data_207__bam_peak_10873	1308	.	6.80544	135.431	130.867	1341	Intron (NM_132704/mamo, intron 4 of 10)	6	13858017	13933343	75327	2	NM_001201660	42841	mamo	mamo
chrX	13890604	13890823	Filter_SAM_or_BAM__output_SAM_or_BAM_on_data_207__bam_peak_10874	775	.	5.496	80.7919	77.5685	625	Intron (NM_132704/mamo, intron 4 of 10)	6	13858017	13933343	75327	2	NM_001201660	42520	mamo	mamo
chrX	14221369	14221737	Filter_SAM_or_BAM__output_SAM_or_BAM_on_data_207__bam_peak_10895	540	.	6.19754	56.7734	54.0691	251	Intron (NM_132719/l(1)G0007, intron 2 of 3)	6	14224647	14225879	1233	2	NM_132720	4142	CG11674	CG11674
chrX	14218549	14218573	Filter_SAM_or_BAM__output_SAM_or_BAM_on_data_207__bam_peak_10892	180	.	3.20937	20.0414	18.0827	187	Intron (NM_132719/l(1)G0007, intron 2 of 3)	6	14212415	14224732	12318	1	NM_167396	6135	l(1)G0007	l(1)G0007
chrX	14218628	14218927	Filter_SAM_or_BAM__output_SAM_or_BAM_on_data_207__bam_peak_10893	253	.	4.03728	27.4826	25.3612	196	Intron (NM_132719/l(1)G0007, intron 2 of 3)	6	14212415	14224732	12318	1	NM_167396	6214	l(1)G0007	l(1)G0007
chr2L	2865822	2866190	Filter_SAM_or_BAM__output_SAM_or_BAM_on_data_207__bam_peak_303	305	.	3.86284	32.7916	30.562	193	Intron (NM_134881/CG2991, intron 3 of 5)	1	2862537	2868548	6012	1	NM_164510	3286	CG2991	CG2991
chr2L	7199804	7200216	Filter_SAM_or_BAM__output_SAM_or_BAM_on_data_207__bam_peak_732	407	.	3.45465	43.139	40.7026	149	Intron (NM_135259/CG4502, intron 1 of 4)	1	7194908	7204264	9357	2	NM_135259	4048	CG4502	CG4502
chr2L	16422754	16423039	Filter_SAM_or_BAM__output_SAM_or_BAM_on_data_207__bam_peak_1594	694	.	5.02359	72.4497	69.4132	178	Intron (NM_135950/CG5888, intron 1 of 3)	1	16417750	16417884	135	2	NR_003760	-4871	snoRNA:Me28S-A2958	snoRNA:Me28S-A2958
chr2R	15745450	15745873	Filter_SAM_or_BAM__output_SAM_or_BAM_on_data_207__bam_peak_3311	984	.	7.75661	102.159	98.4251	222	Intron (NM_137212/CG30089, intron 3 of 6)	2	15735496	15762044	26549	1	NM_001299537	9955	CG30089	CG30089
chr2R	16163496	16163796	Filter_SAM_or_BAM__output_SAM_or_BAM_on_data_207__bam_peak_3374	451	.	4.50101	47.7249	45.1975	323	Intron (NM_137247/lbk, intron 1 of 8)	2	16157267	16158794	1528	2	NM_137246	-4703	CG10734	CG10734
chr2R	18561286	18561486	Filter_SAM_or_BAM__output_SAM_or_BAM_on_data_207__bam_peak_3655	138	.	3.32435	15.723	13.8689	148	Intron (NM_137499/GEFmeso, intron 1 of 7)	2	18541144	18542454	1311	1	NR_133131	20143	lncRNA:CR46271	lncRNA:CR46271
chr3L	11224621	11224684	Filter_SAM_or_BAM__output_SAM_or_BAM_on_data_207__bam_peak_5494	71	.	1.93094	8.7596	7.10277	189	Intron (NM_140197/CG42671, intron 4 of 6)	3	11229029	11229437	409	2	NR_133217	4753	asRNA:CR46050	asRNA:CR46050
chr3L	11224739	11224942	Filter_SAM_or_BAM__output_SAM_or_BAM_on_data_207__bam_peak_5495	116	.	2.90322	13.3936	11.6004	145	Intron (NM_140197/CG42671, intron 4 of 6)	3	11229029	11229437	409	2	NR_133217	4495	asRNA:CR46050	asRNA:CR46050
chr3L	15597157	15597512	Filter_SAM_or_BAM__output_SAM_or_BAM_on_data_207__bam_peak_5869	609	.	4.65392	63.8379	60.9867	454	Intron (NM_140527/RhoGAP71E, intron 1 of 4)	3	15588860	15609125	20266	1	NM_168629	8298	RhoGAP71E	RhoGAP71E
chr3L	18099817	18100051	Filter_SAM_or_BAM__output_SAM_or_BAM_on_data_207__bam_peak_6194	99	.	2.49713	11.66	9.91523	84	Intron (NM_140770/CG13698, intron 1 of 6)	3	18088417	18106149	17733	2	NM_140770	6098	CG13698	CG13698
chr3R	9543527	9543829	Filter_SAM_or_BAM__output_SAM_or_BAM_on_data_207__bam_peak_7264	79	.	1.99192	9.68325	7.99709	125	Intron (NM_141645/mura, intron 2 of 8)	4	9538154	9551338	13185	2	NM_169292	7509	mura	mura
chr3R	9609046	9609270	Filter_SAM_or_BAM__output_SAM_or_BAM_on_data_207__bam_peak_7272	423	.	4.05632	44.8565	42.3866	219	Intron (NM_141661/CG8312, intron 2 of 4)	4	9622944	9625073	2130	1	NM_176438	-13674	CG8312	CG8312
chr3R	13976212	13976473	Filter_SAM_or_BAM__output_SAM_or_BAM_on_data_207__bam_peak_7665	341	.	3.90972	36.5034	34.1993	173	Intron (NM_142069/rdx, intron 1 of 7)	4	13967955	13971800	3846	2	NM_169565	-4413	rdx	rdx
chr3R	18628686	18628898	Filter_SAM_or_BAM__output_SAM_or_BAM_on_data_207__bam_peak_8152	90	.	3.14913	10.7346	9.0163	93	Intron (NM_142478/qin, intron 3 of 9)	4	18592801	18621327	28527	2	NM_142474	-7360	CG14304	CG14304
chr3R	27570613	27570985	Filter_SAM_or_BAM__output_SAM_or_BAM_on_data_207__bam_peak_9081	262	.	2.58753	28.3763	26.2364	192	Intron (NM_143312/wdb, intron 1 of 8)	4	27559379	27561319	1941	2	NM_143311	-9295	CG5646	CG5646
chr3L	1031173	1031469	Filter_SAM_or_BAM__output_SAM_or_BAM_on_data_207__bam_peak_4466	121	.	3.14063	13.9603	12.1518	166	Intron (NM_143703/trio, intron 2 of 16)	3	1034697	1036298	1602	1	NM_138231	-3228	CG9205	CG9205
chr2L	1742602	1742918	Filter_SAM_or_BAM__output_SAM_or_BAM_on_data_207__bam_peak_198	143	.	3.13675	16.1724	14.3066	304	Intron (NM_164436/CG17646, intron 3 of 11)	1	1737467	1750612	13146	1	NM_134774	5136	CG17646	CG17646
chr2L	9692802	9693097	Filter_SAM_or_BAM__output_SAM_or_BAM_on_data_207__bam_peak_1036	67	.	2.17042	8.44615	6.79964	216	Intron (NM_164866/Pka-C1, intron 2 of 2)	1	9682315	9699297	16983	2	NM_164866	6200	Pka-C1	Pka-C1
chr2R	5537481	5537684	Filter_SAM_or_BAM__output_SAM_or_BAM_on_data_207__bam_peak_2123	32	.	2.03751	4.75239	3.25013	92	Intron (NM_165435/Ugt50B3, intron 2 of 5)	2	5527193	5549543	22351	1	NM_001273781	10289	Ugt50B3	Ugt50B3
chr2R	5718862	5719174	Filter_SAM_or_BAM__output_SAM_or_BAM_on_data_207__bam_peak_2135	129	.	2.09206	14.7288	12.9005	141	Intron (NM_165445/ap, intron 1 of 7)	2	5706202	5726832	20631	2	NM_165445	7658	ap	ap
chr2R	5716389	5716552	Filter_SAM_or_BAM__output_SAM_or_BAM_on_data_207__bam_peak_2134	85	.	1.8544	10.2955	8.59124	150	Intron (NM_165445/ap, intron 4 of 7)	2	5706202	5709292	3091	2	NM_078897	-7098	ap	ap
chr2R	6141167	6141821	Filter_SAM_or_BAM__output_SAM_or_BAM_on_data_207__bam_peak_2172	959	.	5.5859	99.6056	95.9351	503	Intron (NM_165463/EcR, intron 4 of 7)	2	6137303	6138411	1109	1	NM_136360	3865	CG14589	CG14589
chr2R	6144566	6144973	Filter_SAM_or_BAM__output_SAM_or_BAM_on_data_207__bam_peak_2176	615	.	5.23919	64.3643	61.5022	535	Intron (NM_165463/EcR, intron 4 of 7)	2	6137303	6138411	1109	1	NM_136360	7264	CG14589	CG14589
chr2R	6145418	6145750	Filter_SAM_or_BAM__output_SAM_or_BAM_on_data_207__bam_peak_2177	608	.	5.41255	63.6885	60.841	298	Intron (NM_165463/EcR, intron 4 of 7)	2	6137303	6138411	1109	1	NM_136360	8116	CG14589	CG14589
chr2R	6150922	6151563	Filter_SAM_or_BAM__output_SAM_or_BAM_on_data_207__bam_peak_2178	1037	.	5.24553	107.626	103.757	347	Intron (NM_165463/EcR, intron 4 of 7)	2	6090419	6157129	66711	2	NM_165463	5566	EcR	EcR
chr2R	6628129	6628566	Filter_SAM_or_BAM__output_SAM_or_BAM_on_data_207__bam_peak_2205	629	.	4.7524	65.8859	62.9916	289	Intron (NM_165474/Vha16-1, intron 2 of 3)	2	6623832	6624577	746	2	NM_001032222	-3553	CG33919	CG33919
chr2R	10019855	10020242	Filter_SAM_or_BAM__output_SAM_or_BAM_on_data_207__bam_peak_2625	458	.	4.5327	48.396	45.8553	169	Intron (NM_165723/Pka-R2, intron 2 of 9)	2	9993890	10026042	32153	2	NM_165723	5800	Pka-R2	Pka-R2
chr2R	16129795	16130599	Filter_SAM_or_BAM__output_SAM_or_BAM_on_data_207__bam_peak_3366	876	.	4.938	91.0797	87.6131	631	Intron (NM_166145/spin, intron 1 of 7)	2	16124981	16138238	13258	1	NM_166147	4815	spin	spin
chr2R	25000477	25000824	Filter_SAM_or_BAM__output_SAM_or_BAM_on_data_207__bam_peak_4300	164	.	2.46604	18.335	16.4164	326	Intron (NM_166704/zip, intron 4 of 13)	2	24990948	25011208	20261	2	NM_001202081	10384	zip	zip
chrX	10319280	10319628	Filter_SAM_or_BAM__output_SAM_or_BAM_on_data_207__bam_peak_10532	33	.	1.82977	4.86519	3.35722	154	Intron (NM_167223/alpha-Man-Ia, intron 2 of 7)	6	10266792	10325958	59167	2	NM_167223	6330	alpha-Man-Ia	alpha-Man-Ia
chrX	11446856	11447397	Filter_SAM_or_BAM__output_SAM_or_BAM_on_data_207__bam_peak_10616	205	.	3.34845	22.5466	20.5312	375	Intron (NM_167285/Evi5, intron 1 of 8)	6	11443177	11446010	2834	1	NM_132489	3680	Sk1	Sk1
chrX	11434019	11434322	Filter_SAM_or_BAM__output_SAM_or_BAM_on_data_207__bam_peak_10615	159	.	3.44541	17.8521	15.945	117	Intron (NM_167285/Evi5, intron 8 of 8)	6	11442539	11446012	3474	1	NM_167286	-8217	Sk1	Sk1
chr3L	557088	557322	Filter_SAM_or_BAM__output_SAM_or_BAM_on_data_207__bam_peak_4393	234	.	2.64042	25.555	23.4744	66	Intron (NM_167834/Hipk, intron 2 of 10)	3	553216	553739	524	1	NR_133144	3873	lncRNA:CR45808	lncRNA:CR45808
chr3L	557570	557879	Filter_SAM_or_BAM__output_SAM_or_BAM_on_data_207__bam_peak_4394	257	.	2.87597	27.9294	25.7987	134	Intron (NM_167834/Hipk, intron 2 of 10)	3	553216	553739	524	1	NR_133144	4355	lncRNA:CR45808	lncRNA:CR45808
chr3L	1366736	1367472	Filter_SAM_or_BAM__output_SAM_or_BAM_on_data_207__bam_peak_4507	362	.	3.38621	38.6443	36.2978	256	Intron (NM_167874/Ptp61F, intron 1 of 6)	3	1370628	1387437	16810	1	NM_080051	-3156	ru	ru
chr3L	6023215	6023518	Filter_SAM_or_BAM__output_SAM_or_BAM_on_data_207__bam_peak_4978	117	.	3.51531	13.5531	11.7555	150	Intron (NM_168153/PVRAP, intron 4 of 6)	3	6033199	6034611	1413	2	NM_139753	11093	CG10477	CG10477
chr3L	9571641	9571965	Filter_SAM_or_BAM__output_SAM_or_BAM_on_data_207__bam_peak_5320	156	.	3.26612	17.5137	15.6144	126	Intron (NM_168352/CG42673, intron 2 of 9)	3	9583550	9594509	10960	1	NM_168353	-11585	CG42673	CG42673
chr3L	11544520	11544888	Filter_SAM_or_BAM__output_SAM_or_BAM_on_data_207__bam_peak_5536	693	.	5.20654	72.4181	69.3824	198	Intron (NM_168461/Mob2, intron 1 of 4)	3	11552539	11552693	155	2	NR_048256	7805	mir-4968	mir-4968
chr3L	11543294	11543512	Filter_SAM_or_BAM__output_SAM_or_BAM_on_data_207__bam_peak_5535	90	.	2.45072	10.7453	9.02656	114	Intron (NM_168461/Mob2, intron 1 of 4)	3	11524296	11534478	10183	2	NM_001274784	-8817	Mob2	Mob2
chr3L	19349762	19350066	Filter_SAM_or_BAM__output_SAM_or_BAM_on_data_207__bam_peak_6326	470	.	7.03062	49.6159	47.0507	139	Intron (NM_168794/CG32206, intron 11 of 13)	3	19310894	19337609	26716	2	NM_176359	-12154	pip	pip
chr3L	21014372	21014892	Filter_SAM_or_BAM__output_SAM_or_BAM_on_data_207__bam_peak_6496	1085	.	10.1418	112.529	108.539	531	Intron (NM_168879/skd, intron 2 of 12)	3	21006379	21006520	142	2	NR_048303	-7853	scaRNA:PsiU6-40	scaRNA:PsiU6-40
chr3L	21011656	21012079	Filter_SAM_or_BAM__output_SAM_or_BAM_on_data_207__bam_peak_6494	602	.	5.94627	63.0758	60.2418	336	Intron (NM_168879/skd, intron 3 of 12)	3	21006379	21006520	142	2	NR_048303	-5137	scaRNA:PsiU6-40	scaRNA:PsiU6-40
chr3R	15293971	15294249	Filter_SAM_or_BAM__output_SAM_or_BAM_on_data_207__bam_peak_7831	41	.	1.71748	5.65239	4.1105	181	Intron (NM_169635/Tm1, intron 3 of 9)	4	15290946	15308779	17834	1	NM_001275661	3026	Tm1	Tm1
chr3R	21172799	21172937	Filter_SAM_or_BAM__output_SAM_or_BAM_on_data_207__bam_peak_8402	105	.	2.65889	12.3246	10.561	172	Intron (NM_169946/SNF4Agamma, intron 3 of 12)	4	21165498	21168205	2708	2	NM_142696	-4595	Snmp1	Snmp1
chr3R	22046575	22047085	Filter_SAM_or_BAM__output_SAM_or_BAM_on_data_207__bam_peak_8521	484	.	4.11668	51.064	48.471	326	Intron (NM_169992/how, intron 2 of 6)	4	22042191	22079321	37131	1	NM_079723	4385	how	how
chr3R	22053443	22053659	Filter_SAM_or_BAM__output_SAM_or_BAM_on_data_207__bam_peak_8523	67	.	2.17042	8.44615	6.79964	130	Intron (NM_169992/how, intron 2 of 6)	4	22042191	22079321	37131	1	NM_079723	11253	how	how
chr3R	24565910	24566236	Filter_SAM_or_BAM__output_SAM_or_BAM_on_data_207__bam_peak_8805	1298	.	5.39499	134.364	129.832	1522	Intron (NM_170151/REPTOR, intron 2 of 4)	4	24559789	24571965	12177	2	NM_001300576	5729	REPTOR	REPTOR
chr3R	30482984	30483160	Filter_SAM_or_BAM__output_SAM_or_BAM_on_data_207__bam_peak_9356	60	.	2.70972	7.67814	6.05901	21	Intron (NM_170492/PH4alphaEFB, intron 4 of 8)	4	30487016	30487928	913	2	NM_143542	4768	Jon99Fii	Jon99Fii
chr3R	30794812	30794818	Filter_SAM_or_BAM__output_SAM_or_BAM_on_data_207__bam_peak_9385	94	.	2.27154	11.2011	9.46973	103	Intron (NM_170524/wts, intron 2 of 7)	4	30791636	30791696	61	2	NR_048516	-3117	mir-1013	mir-1013
chr3R	8927439	8927736	Filter_SAM_or_BAM__output_SAM_or_BAM_on_data_207__bam_peak_7160	447	.	3.77692	47.218	44.7002	207	Intron (NM_170646/pyd, intron 1 of 13)	4	8827498	8931896	104399	2	NM_170646	4160	pyd	pyd
chr2L	5247339	5247949	Filter_SAM_or_BAM__output_SAM_or_BAM_on_data_207__bam_peak_544	194	.	2.49368	21.4695	19.4785	743	Intron (NM_175975/tkv, intron 1 of 3)	1	5219000	5244139	25140	2	NM_175976	-3201	tkv	tkv
chr2L	5224739	5225071	Filter_SAM_or_BAM__output_SAM_or_BAM_on_data_207__bam_peak_541	292	.	3.72572	31.4069	29.2052	220	Intron (NM_175978/tkv, intron 1 of 2)	1	5218254	5219053	800	1	NM_135071	6486	TpnC25D	TpnC25D
chr2L	8423418	8423772	Filter_SAM_or_BAM__output_SAM_or_BAM_on_data_207__bam_peak_905	233	.	2.82358	25.4233	23.3451	608	Intron (NM_175984/Akap200, intron 1 of 4)	1	8426773	8430977	4205	1	NM_058111	-3001	Akap200	Akap200
chr2L	9143173	9143620	Filter_SAM_or_BAM__output_SAM_or_BAM_on_data_207__bam_peak_970	623	.	4.79953	65.1916	62.3122	314	Intron (NM_176001/CG32982, intron 2 of 8)	1	9151199	9163721	12523	1	NM_176002	-7579	CG32982	CG32982
chr2L	9158376	9158648	Filter_SAM_or_BAM__output_SAM_or_BAM_on_data_207__bam_peak_972	368	.	3.40712	39.1869	36.8295	154	Intron (NM_176001/CG32982, intron 4 of 8)	1	9164235	9165426	1192	1	NM_135432	-5587	CG13108	CG13108
chr3R	15677547	15677921	Filter_SAM_or_BAM__output_SAM_or_BAM_on_data_207__bam_peak_7866	572	.	5.1183	60.0635	57.2923	267	Intron (NM_176504/pxb, intron 2 of 4)	4	15667978	15668676	699	1	NR_074016	9570	lncRNA:CR43849	lncRNA:CR43849
chr2R	9949467	9950021	Filter_SAM_or_BAM__output_SAM_or_BAM_on_data_207__bam_peak_2614	892	.	5.62248	92.7161	89.2113	555	Intron (NM_206067/Mef2, intron 1 of 9)	2	9915502	9944764	29263	2	NM_001273912	-4704	Mef2	Mef2
chr2R	9955023	9955651	Filter_SAM_or_BAM__output_SAM_or_BAM_on_data_207__bam_peak_2616	341	.	4.09061	36.4509	34.1479	354	Intron (NM_206067/Mef2, intron 1 of 9)	2	9913496	9958858	45363	2	NM_206067	3207	Mef2	Mef2
chr3L	21652804	21653199	Filter_SAM_or_BAM__output_SAM_or_BAM_on_data_207__bam_peak_6583	752	.	4.60871	78.4466	75.2763	176	Intron (NM_206420/CG43980, intron 2 of 7)	3	21658222	21666306	8085	1	NM_001275256	-5023	CG43980	CG43980
chr3R	6912210	6912561	Filter_SAM_or_BAM__output_SAM_or_BAM_on_data_207__bam_peak_6979	885	.	6.03844	92.0266	88.5369	167	Intron (NM_206444/Antp, intron 1 of 4)	4	6903442	6904682	1241	2	NR_125091	-7529	lncRNA:CR43252	lncRNA:CR43252
chr3R	6912753	6913173	Filter_SAM_or_BAM__output_SAM_or_BAM_on_data_207__bam_peak_6980	963	.	8.94282	100.065	96.3851	198	Intron (NM_206444/Antp, intron 1 of 4)	4	6903442	6904682	1241	2	NR_125091	-8072	lncRNA:CR43252	lncRNA:CR43252
chr3R	16764075	16764384	Filter_SAM_or_BAM__output_SAM_or_BAM_on_data_207__bam_peak_7988	614	.	4.68576	64.2856	61.4254	603	Intron (NR_002035/lncRNA:bxd, intron 1 of 2)	4	16742125	16773189	31065	2	NR_002035	8805	lncRNA:bxd	lncRNA:bxd
chr3R	16918987	16919371	Filter_SAM_or_BAM__output_SAM_or_BAM_on_data_207__bam_peak_7996	235	.	4.01222	25.6139	23.5318	248	Intron (NR_048412/lncRNA:iab8, intron 1 of 6)	4	16831116	16923127	92012	2	NR_048412	3756	lncRNA:iab8	lncRNA:iab8
chr3R	16869276	16869758	Filter_SAM_or_BAM__output_SAM_or_BAM_on_data_207__bam_peak_7994	1768	.	7.73397	182.656	176.869	219	Intron (NR_074020/lncRNA:iab8, intron 2 of 5)	4	16856275	16856342	68	2	NR_048417	-12935	mir-iab-8	mir-iab-8
chrX	7299777	7300092	Filter_SAM_or_BAM__output_SAM_or_BAM_on_data_207__bam_peak_10258	1098	.	9.51933	113.845	109.826	271	Intron (NR_123818/lncRNA:CR44357, intron 2 of 3)	6	7307939	7311132	3194	1	NM_078514	-7847	brk	brk
chrX	7300968	7301286	Filter_SAM_or_BAM__output_SAM_or_BAM_on_data_207__bam_peak_10258	1098	.	9.51933	113.845	109.826	271	Intron (NR_123818/lncRNA:CR44357, intron 2 of 3)	6	7307939	7311132	3194	1	NM_078514	-6653	brk	brk
chr3R	10087123	10087727	Filter_SAM_or_BAM__output_SAM_or_BAM_on_data_207__bam_peak_7326	960	.	5.04164	99.7006	96.0274	480	Intron (NR_125127/lncRNA:CR45054, intron 1 of 1)	4	10091126	10091217	92	1	NR_048356	-3399	mir-317	mir-317
chr3R	10087815	10087889	Filter_SAM_or_BAM__output_SAM_or_BAM_on_data_207__bam_peak_7327	113	.	2.25832	13.1238	11.338	170	Intron (NR_125127/lncRNA:CR45054, intron 1 of 1)	4	10091126	10091217	92	1	NR_048356	-3237	mir-317	mir-317
chr2R	13333328	13333995	Filter_SAM_or_BAM__output_SAM_or_BAM_on_data_207__bam_peak_3053	729	.	4.98427	76.1124	72.9952	302	Intron (NR_133117/lncRNA:CR44206, intron 1 of 1)	2	13329352	13337335	7984	2	NR_133117	3340	lncRNA:CR44206	lncRNA:CR44206
chr3L	10354660	10355088	Filter_SAM_or_BAM__output_SAM_or_BAM_on_data_207__bam_peak_5388	312	.	4.5923	33.5179	31.2735	256	Intron (NR_133209/lncRNA:CR46006, intron 3 of 3)	3	10364019	10367450	3432	1	NR_133213	-8931	lncRNA:CR46006	lncRNA:CR46006
chr2R	12037147	12037401	Filter_SAM_or_BAM__output_SAM_or_BAM_on_data_207__bam_peak_2894	106	.	2.19434	12.3846	10.6193	105	Promoter (<=1kb)	2	12037298	12038851	1554	1	NM_080485	0	128up	128up
chr3R	18242150	18242943	Filter_SAM_or_BAM__output_SAM_or_BAM_on_data_207__bam_peak_8096	162	.	3.15603	18.1525	16.2381	120	Promoter (<=1kb)	4	18242531	18250279	7749	1	NM_169797	0	14-3-3epsilon	14-3-3epsilon
chr2R	10099529	10099845	Filter_SAM_or_BAM__output_SAM_or_BAM_on_data_207__bam_peak_2648	467	.	3.82933	49.3232	46.7644	184	Promoter (<=1kb)	2	10099677	10108474	8798	1	NM_165744	0	14-3-3zeta	14-3-3zeta
chr2R	10100035	10100343	Filter_SAM_or_BAM__output_SAM_or_BAM_on_data_207__bam_peak_2649	205	.	3.00271	22.615	20.5978	98	Promoter (<=1kb)	2	10099677	10109687	10011	1	NM_206070	359	14-3-3zeta	14-3-3zeta
chr2R	10100576	10100721	Filter_SAM_or_BAM__output_SAM_or_BAM_on_data_207__bam_peak_2650	29	.	1.55392	4.38777	2.90311	86	Promoter (<=1kb)	2	10101036	10107695	6660	1	NM_001014516	-315	14-3-3zeta	14-3-3zeta
chr2R	10100773	10101380	Filter_SAM_or_BAM__output_SAM_or_BAM_on_data_207__bam_peak_2651	342	.	3.19759	36.5734	34.2677	369	Promoter (<=1kb)	2	10101036	10107695	6660	1	NM_001014516	0	14-3-3zeta	14-3-3zeta
chr2R	10101433	10101995	Filter_SAM_or_BAM__output_SAM_or_BAM_on_data_207__bam_peak_2652	734	.	6.00999	76.6141	73.4853	392	Promoter (<=1kb)	2	10101036	10109687	8652	1	NM_165745	398	14-3-3zeta	14-3-3zeta
chr2R	10103461	10103844	Filter_SAM_or_BAM__output_SAM_or_BAM_on_data_207__bam_peak_2653	224	.	2.92383	24.4669	22.4092	257	Promoter (<=1kb)	2	10104115	10108474	4360	1	NM_001273917	-271	14-3-3zeta	14-3-3zeta
chr2R	20110935	20111357	Filter_SAM_or_BAM__output_SAM_or_BAM_on_data_207__bam_peak_3812	521	.	4.64045	54.8208	52.1545	233	Promoter (<=1kb)	2	20111511	20116932	5422	1	NM_057466	-154	18w	18w
chr2R	20111465	20111653	Filter_SAM_or_BAM__output_SAM_or_BAM_on_data_207__bam_peak_3813	33	.	1.82977	4.86519	3.35722	145	Promoter (<=1kb)	2	20111511	20116932	5422	1	NM_057466	0	18w	18w
chr3L	13994042	13994478	Filter_SAM_or_BAM__output_SAM_or_BAM_on_data_207__bam_peak_5708	120	.	2.05531	13.8778	12.0721	199	Promoter (<=1kb)	3	13994231	13996571	2341	1	NM_138985	0	26-29-p	26-29-p
chr4	958253	958608	Filter_SAM_or_BAM__output_SAM_or_BAM_on_data_207__bam_peak_9563	210	.	2.77266	23.0333	21.0072	167	Promoter (<=1kb)	5	951542	958392	6851	2	NM_166796	0	4E-T	4E-T
chr2R	22136798	22137146	Filter_SAM_or_BAM__output_SAM_or_BAM_on_data_207__bam_peak_4002	484	.	4.05563	51.0524	48.4601	172	Promoter (<=1kb)	2	22136968	22172834	35867	1	NM_001014543	0	a	a
chr2L	13021252	13021640	Filter_SAM_or_BAM__output_SAM_or_BAM_on_data_207__bam_peak_1325	51	.	1.73254	6.70734	5.12462	60	Promoter (<=1kb)	1	13019575	13021312	1738	2	NM_135754	0	A16	A16
chr2L	6717147	6717703	Filter_SAM_or_BAM__output_SAM_or_BAM_on_data_207__bam_peak_677	324	.	3.81663	34.6929	32.4251	174	Promoter (<=1kb)	1	6717625	6719389	1765	1	NM_135222	0	Aatf	Aatf
chr3L	1618150	1618431	Filter_SAM_or_BAM__output_SAM_or_BAM_on_data_207__bam_peak_4536	61	.	2.09202	7.7334	6.11166	55	Promoter (<=1kb)	3	1618414	1623159	4746	1	NM_167903	0	ABCB7	ABCB7
chr4	193643	193912	Filter_SAM_or_BAM__output_SAM_or_BAM_on_data_207__bam_peak_9510	101	.	2.34916	11.9413	10.1886	130	Promoter (<=1kb)	5	184076	193829	9754	2	NM_166736	0	ABCD	ABCD
chr3R	16830086	16830366	Filter_SAM_or_BAM__output_SAM_or_BAM_on_data_207__bam_peak_7990	469	.	5.84611	49.4978	46.9359	160	Promoter (<=1kb)	4	16807214	16830049	22836	2	NM_001260216	-38	abd-A	abd-A
chr3R	16969411	16970417	Filter_SAM_or_BAM__output_SAM_or_BAM_on_data_207__bam_peak_8000	1279	.	5.4431	132.419	127.942	285	Promoter (<=1kb)	4	16927667	16968574	40908	2	NM_001316542	-838	Abd-B	Abd-B
chr3L	16647782	16648185	Filter_SAM_or_BAM__output_SAM_or_BAM_on_data_207__bam_peak_5991	378	.	3.02251	40.2204	37.8421	144	Promoter (<=1kb)	3	16615866	16647882	32017	2	NM_001104153	0	Abl	Abl
chr3L	13486157	13486440	Filter_SAM_or_BAM__output_SAM_or_BAM_on_data_207__bam_peak_5684	251	.	2.70856	27.3056	25.1876	141	Promoter (<=1kb)	3	13483533	13486280	2748	2	NM_140400	0	Abp1	Abp1
chr3L	19938996	19939425	Filter_SAM_or_BAM__output_SAM_or_BAM_on_data_207__bam_peak_6394	455	.	4.8887	48.1225	45.587	264	Promoter (<=1kb)	3	19939287	19977960	38674	1	NM_001259909	0	Ac76E	Ac76E
chr3L	21171778	21172190	Filter_SAM_or_BAM__output_SAM_or_BAM_on_data_207__bam_peak_6517	143	.	2.87701	16.2419	14.3744	340	Promoter (<=1kb)	3	21136447	21171930	35484	2	NM_001275209	0	Ac78C	Ac78C
chr2L	8162277	8162764	Filter_SAM_or_BAM__output_SAM_or_BAM_on_data_207__bam_peak_854	482	.	3.24299	50.8388	48.2502	148	Promoter (<=1kb)	1	8161796	8162418	623	2	NM_135343	0	Acbp1	Acbp1
chr3L	8787313	8787600	Filter_SAM_or_BAM__output_SAM_or_BAM_on_data_207__bam_peak_5226	442	.	4.64744	46.7159	44.2088	131	Promoter (<=1kb)	3	8788144	8788545	402	2	NM_139998	945	Acbp5	Acbp5
chr2R	7989582	7990018	Filter_SAM_or_BAM__output_SAM_or_BAM_on_data_207__bam_peak_2390	498	.	5.11261	52.4298	49.8102	1310	Promoter (<=1kb)	2	7974115	7989714	15600	2	NM_001299248	0	ACC	ACC
chr3L	21276946	21277393	Filter_SAM_or_BAM__output_SAM_or_BAM_on_data_207__bam_peak_6538	330	.	3.46046	35.3605	33.0792	164	Promoter (<=1kb)	3	21271209	21276345	5137	2	NM_079472	-602	AcCoAS	AcCoAS
chr3L	21279910	21280192	Filter_SAM_or_BAM__output_SAM_or_BAM_on_data_207__bam_peak_6540	351	.	3.67787	37.4385	35.116	135	Promoter (<=1kb)	3	21271209	21279981	8773	2	NM_001014599	0	AcCoAS	AcCoAS
chr3R	31793757	31794074	Filter_SAM_or_BAM__output_SAM_or_BAM_on_data_207__bam_peak_9478	200	.	2.94759	22.0042	20.0009	137	Promoter (<=1kb)	4	31793981	31799799	5819	1	NM_080486	0	Acf	Acf
chr3R	31794475	31794699	Filter_SAM_or_BAM__output_SAM_or_BAM_on_data_207__bam_peak_9479	194	.	3.07192	21.4112	19.4212	61	Promoter (<=1kb)	4	31793981	31799799	5819	1	NM_080486	495	Acf	Acf
chr3L	4108018	4108430	Filter_SAM_or_BAM__output_SAM_or_BAM_on_data_207__bam_peak_4820	210	.	3.28681	23.0795	21.0525	158	Promoter (<=1kb)	3	4108186	4114157	5972	1	NM_139602	0	Ack	Ack
chr2R	13152528	13152757	Filter_SAM_or_BAM__output_SAM_or_BAM_on_data_207__bam_peak_3037	187	.	2.81936	20.7337	18.7593	168	Promoter (<=1kb)	2	13142834	13152677	9844	2	NM_057738	0	Ack-like	Ack-like
chr2L	19045173	19045462	Filter_SAM_or_BAM__output_SAM_or_BAM_on_data_207__bam_peak_1797	41	.	1.71748	5.65239	4.1105	132	Promoter (<=1kb)	1	19045355	19048177	2823	1	NM_165273	0	Acn	Acn
chr2R	21386160	21386845	Filter_SAM_or_BAM__output_SAM_or_BAM_on_data_207__bam_peak_3929	172	.	2.42278	19.191	17.2519	178	Promoter (<=1kb)	2	21386309	21389276	2968	1	NM_079078	0	Acox57D-p	Acox57D-p
chr2R	8665358	8665847	Filter_SAM_or_BAM__output_SAM_or_BAM_on_data_207__bam_peak_2460	537	.	4.66477	56.4307	53.7331	708	Promoter (<=1kb)	2	8665813	8683022	17210	1	NM_001014511	0	Acsl	Acsl
chr2R	8665965	8666418	Filter_SAM_or_BAM__output_SAM_or_BAM_on_data_207__bam_peak_2460	537	.	4.66477	56.4307	53.7331	708	Promoter (<=1kb)	2	8666171	8682791	16621	1	NM_001014512	0	Acsl	Acsl
chr2R	6015440	6016201	Filter_SAM_or_BAM__output_SAM_or_BAM_on_data_207__bam_peak_2154	398	.	3.1361	42.2399	39.8214	251	Promoter (<=1kb)	2	6013910	6015689	1780	2	NM_078901	0	Act42A	Act42A
chrX	5900626	5901057	Filter_SAM_or_BAM__output_SAM_or_BAM_on_data_207__bam_peak_10123	721	.	3.574	75.2197	72.1225	1338	Promoter (<=1kb)	6	5900861	5904173	3313	1	NM_167053	0	Act5C	Act5C
chrX	5901622	5902270	Filter_SAM_or_BAM__output_SAM_or_BAM_on_data_207__bam_peak_10124	326	.	3.09245	34.8765	32.6052	282	Promoter (<=1kb)	6	5901982	5905227	3246	1	NM_078497	0	Act5C	Act5C
chr4	1084736	1085097	Filter_SAM_or_BAM__output_SAM_or_BAM_on_data_207__bam_peak_9574	431	.	4.3153	45.6275	43.1413	140	Promoter (<=1kb)	5	1077331	1084796	7466	2	NM_143685	0	Actbeta	Actbeta
chrX	2042157	2042579	Filter_SAM_or_BAM__output_SAM_or_BAM_on_data_207__bam_peak_9754	733	.	8.3465	76.4386	73.314	181	Promoter (<=1kb)	6	2023822	2042311	18490	2	NM_058137	0	Actn	Actn
chr3R	16978002	16978239	Filter_SAM_or_BAM__output_SAM_or_BAM_on_data_207__bam_peak_8001	139	.	3.08053	15.7703	13.9149	59	Promoter (<=1kb)	4	16975885	16977795	1911	2	NM_080062	-208	Actn3	Actn3
chr2L	13911740	13912100	Filter_SAM_or_BAM__output_SAM_or_BAM_on_data_207__bam_peak_1425	179	.	4.20407	19.9072	17.9516	178	Promoter (<=1kb)	1	13912083	13912596	514	1	NM_078839	0	Acyp	Acyp
chr3R	15792531	15792782	Filter_SAM_or_BAM__output_SAM_or_BAM_on_data_207__bam_peak_7872	203	.	2.69643	22.3357	20.3251	135	Promoter (<=1kb)	4	15792688	15793411	724	1	NM_142234	0	Acyp2	Acyp2
chr3R	9064999	9065267	Filter_SAM_or_BAM__output_SAM_or_BAM_on_data_207__bam_peak_7194	327	.	3.1398	35.038	32.7633	178	Promoter (<=1kb)	4	9065183	9066303	1121	1	NM_141609	0	Ada	Ada
chr3R	18255362	18255581	Filter_SAM_or_BAM__output_SAM_or_BAM_on_data_207__bam_peak_8102	79	.	1.99918	9.67942	7.99347	82	Promoter (<=1kb)	4	18252843	18255487	2645	2	NM_001014634	0	Ada2a	Ada2a
chr3R	8240250	8240704	Filter_SAM_or_BAM__output_SAM_or_BAM_on_data_207__bam_peak_7095	274	.	3.18705	29.5845	27.4199	300	Promoter (<=1kb)	4	8236632	8240515	3884	2	NM_001275438	0	Ada2b	Ada2b
chr3R	15476003	15476514	Filter_SAM_or_BAM__output_SAM_or_BAM_on_data_207__bam_peak_7852	326	.	3.42668	34.9115	32.6394	610	Promoter (<=1kb)	4	15442246	15476193	33948	2	NM_206496	0	AdamTS-A	AdamTS-A
chrX	1773547	1773882	Filter_SAM_or_BAM__output_SAM_or_BAM_on_data_207__bam_peak_9716	215	.	4.33014	23.5958	21.5574	195	Promoter (<=1kb)	6	1773725	1781160	7436	1	NM_001258541	0	Adar	Adar
chr2L	13811411	13811643	Filter_SAM_or_BAM__output_SAM_or_BAM_on_data_207__bam_peak_1411	123	.	2.07042	14.2033	12.3884	130	Promoter (<=1kb)	1	13808360	13811474	3115	2	NM_135832	0	Adat1	Adat1
chr2R	24611309	24611912	Filter_SAM_or_BAM__output_SAM_or_BAM_on_data_207__bam_peak_4249	250	.	3.0936	27.1773	25.062	212	Promoter (<=1kb)	2	24611703	24613906	2204	1	NM_138103	0	Adck	Adck
chr3L	13022378	13022795	Filter_SAM_or_BAM__output_SAM_or_BAM_on_data_207__bam_peak_5658	273	.	2.54083	29.4801	27.3174	461	Promoter (<=1kb)	3	13019715	13022688	2974	2	NM_001300125	0	AdenoK	AdenoK
chr2R	6661932	6662437	Filter_SAM_or_BAM__output_SAM_or_BAM_on_data_207__bam_peak_2215	335	.	3.44257	35.8132	33.5232	183	Promoter (<=1kb)	2	6662265	6668085	5821	1	NM_001273801	0	Adf1	Adf1
chr3L	17763988	17764475	Filter_SAM_or_BAM__output_SAM_or_BAM_on_data_207__bam_peak_6133	716	.	4.28669	74.7146	71.6296	861	Promoter (<=1kb)	3	17751731	17764158	12428	2	NM_079406	0	Adgf-A	Adgf-A
chr3L	10663135	10663710	Filter_SAM_or_BAM__output_SAM_or_BAM_on_data_207__bam_peak_5411	551	.	5.02111	57.8996	55.172	270	Promoter (<=1kb)	3	10663376	10664435	1060	1	NM_001104107	0	Adi1	Adi1
chr3R	22547749	22548024	Filter_SAM_or_BAM__output_SAM_or_BAM_on_data_207__bam_peak_8566	187	.	3.07746	20.6785	18.7049	112	Promoter (<=1kb)	4	22543693	22547846	4154	2	NM_142804	0	AdipoR	AdipoR
chr2R	24024017	24024346	Filter_SAM_or_BAM__output_SAM_or_BAM_on_data_207__bam_peak_4189	164	.	2.37554	18.3702	16.4508	173	Promoter (<=1kb)	2	24024207	24025877	1671	1	NM_079112	0	Adk2	Adk2
chr3R	10888641	10888951	Filter_SAM_or_BAM__output_SAM_or_BAM_on_data_207__bam_peak_7407	326	.	3.01683	34.9702	32.6965	273	Promoter (<=1kb)	4	10887345	10889281	1937	2	NM_001300351	330	Adk3	Adk3
chr3R	17020984	17021327	Filter_SAM_or_BAM__output_SAM_or_BAM_on_data_207__bam_peak_8007	151	.	2.46701	16.9922	15.1058	264	Promoter (<=1kb)	4	17018780	17021120	2341	2	NM_142329	0	AdSL	AdSL
chr3R	20829763	20830174	Filter_SAM_or_BAM__output_SAM_or_BAM_on_data_207__bam_peak_8346	587	.	5.70274	61.5939	58.7905	361	Promoter (<=1kb)	4	20824667	20830580	5914	2	NM_142661	406	AdSS	AdSS
chr3R	9334603	9334858	Filter_SAM_or_BAM__output_SAM_or_BAM_on_data_207__bam_peak_7216	255	.	3.11796	27.6834	25.5575	134	Promoter (<=1kb)	4	9332064	9334714	2651	2	NM_141625	0	Aduk	Aduk
chr2R	7245630	7246087	Filter_SAM_or_BAM__output_SAM_or_BAM_on_data_207__bam_peak_2276	557	.	4.15203	58.5075	55.7678	178	Promoter (<=1kb)	2	7243024	7245776	2753	2	NM_143738	0	Ady43A	Ady43A
chr3R	14326304	14326805	Filter_SAM_or_BAM__output_SAM_or_BAM_on_data_207__bam_peak_7713	205	.	3.25292	22.546	20.5308	411	Promoter (<=1kb)	4	14320191	14326689	6499	2	NM_001260173	0	Afti	Afti
chrX	5815697	5816082	Filter_SAM_or_BAM__output_SAM_or_BAM_on_data_207__bam_peak_10112	470	.	6.79147	49.6553	47.0895	157	Promoter (<=1kb)	6	5814864	5815820	957	2	NM_132040	0	AgmNAT	AgmNAT
chr3L	4252208	4252499	Filter_SAM_or_BAM__output_SAM_or_BAM_on_data_207__bam_peak_4841	68	.	2.05956	8.50297	6.85487	178	Promoter (<=1kb)	3	4246343	4252051	5709	2	NM_168072	-158	ago	ago
chr3L	4254110	4254406	Filter_SAM_or_BAM__output_SAM_or_BAM_on_data_207__bam_peak_4843	234	.	3.58256	25.5561	23.4753	137	Promoter (<=1kb)	3	4246343	4254306	7964	2	NM_079198	0	ago	ago
chr2R	13953686	13953823	Filter_SAM_or_BAM__output_SAM_or_BAM_on_data_207__bam_peak_3120	175	.	2.51204	19.512	17.5656	177	Promoter (<=1kb)	2	13945409	13954025	8617	2	NM_079010	202	AGO1	AGO1
chr2R	13953948	13954258	Filter_SAM_or_BAM__output_SAM_or_BAM_on_data_207__bam_peak_3121	189	.	2.61456	20.9133	18.9351	164	Promoter (<=1kb)	2	13945409	13954025	8617	2	NM_079010	0	AGO1	AGO1
chr2R	13957049	13957854	Filter_SAM_or_BAM__output_SAM_or_BAM_on_data_207__bam_peak_3122	678	.	3.62188	70.8625	67.8608	276	Promoter (<=1kb)	2	13943387	13958089	14703	2	NM_001259385	235	AGO1	AGO1
chr2R	13958022	13958407	Filter_SAM_or_BAM__output_SAM_or_BAM_on_data_207__bam_peak_3122	678	.	3.62188	70.8625	67.8608	276	Promoter (<=1kb)	2	13943387	13958089	14703	2	NM_001259385	0	AGO1	AGO1
chr3L	15553925	15554719	Filter_SAM_or_BAM__output_SAM_or_BAM_on_data_207__bam_peak_5856	464	.	3.43541	49.0118	46.4586	176	Promoter (<=1kb)	3	15554113	15561042	6930	1	NM_140518	0	AGO2	AGO2
chrX	12764720	12764998	Filter_SAM_or_BAM__output_SAM_or_BAM_on_data_207__bam_peak_10763	217	.	4.52765	23.7691	21.7269	115	Promoter (<=1kb)	6	12765266	12770978	5713	1	NM_132600	-268	Agpat1	Agpat1
chr2L	8463787	8464271	Filter_SAM_or_BAM__output_SAM_or_BAM_on_data_207__bam_peak_911	190	.	2.942	21.0232	19.0422	193	Promoter (<=1kb)	1	8449691	8463994	14304	2	NM_001169441	0	Agpat2	Agpat2
chr3L	16385369	16385593	Filter_SAM_or_BAM__output_SAM_or_BAM_on_data_207__bam_peak_5954	121	.	2.489	13.9493	12.1412	58	Promoter (<=1kb)	3	16381772	16385809	4038	2	NM_001259864	216	Agpat3	Agpat3
chr3L	16381538	16381867	Filter_SAM_or_BAM__output_SAM_or_BAM_on_data_207__bam_peak_5953	83	.	2.06091	9.99866	8.30353	253	Promoter (<=1kb)	3	16378974	16381570	2597	2	NM_001275013	0	Agpat4	Agpat4
chr3R	6659910	6660321	Filter_SAM_or_BAM__output_SAM_or_BAM_on_data_207__bam_peak_6963	507	.	5.09547	53.3391	50.7021	220	Promoter (<=1kb)	4	6658806	6660100	1295	2	NM_001316493	0	agt	agt
chr3L	15583466	15583666	Filter_SAM_or_BAM__output_SAM_or_BAM_on_data_207__bam_peak_5864	60	.	2.04297	7.71647	6.09598	150	Promoter (<=1kb)	3	15583638	15585347	1710	1	NM_140525	0	AIMP2	AIMP2
chr2R	23543870	23544073	Filter_SAM_or_BAM__output_SAM_or_BAM_on_data_207__bam_peak_4116	44	.	1.787	6.04996	4.49251	21	Promoter (<=1kb)	2	23544024	23544901	878	1	NM_145193	0	AIMP3	AIMP3
chr2R	12569737	12570001	Filter_SAM_or_BAM__output_SAM_or_BAM_on_data_207__bam_peak_2957	356	.	3.12146	37.9522	35.6194	110	Promoter (<=1kb)	2	12569014	12569847	834	2	NM_136953	0	Ak6	Ak6
chr2L	8416577	8416818	Filter_SAM_or_BAM__output_SAM_or_BAM_on_data_207__bam_peak_898	103	.	2.21624	12.0921	10.3347	80	Promoter (<=1kb)	1	8415743	8431297	15555	1	NM_001298823	835	Akap200	Akap200
chr2L	8419571	8419623	Filter_SAM_or_BAM__output_SAM_or_BAM_on_data_207__bam_peak_901	404	.	3.76216	42.8706	40.4393	201	Promoter (<=1kb)	1	8419872	8430977	11106	1	NM_001298824	-249	Akap200	Akap200
chr2L	8419755	8420040	Filter_SAM_or_BAM__output_SAM_or_BAM_on_data_207__bam_peak_902	407	.	3.01672	43.1489	40.7123	167	Promoter (<=1kb)	1	8419872	8430977	11106	1	NM_001298824	0	Akap200	Akap200
chr2L	8426099	8426398	Filter_SAM_or_BAM__output_SAM_or_BAM_on_data_207__bam_peak_906	319	.	3.01854	34.2374	31.979	265	Promoter (<=1kb)	1	8426773	8430977	4205	1	NM_058111	-375	Akap200	Akap200
chr3L	7370484	7370530	Filter_SAM_or_BAM__output_SAM_or_BAM_on_data_207__bam_peak_5056	275	.	3.61227	29.7467	27.5785	142	Promoter (<=1kb)	3	7370340	7373711	3372	1	NM_001202129	145	akirin	akirin
chr3R	16098587	16099505	Filter_SAM_or_BAM__output_SAM_or_BAM_on_data_207__bam_peak_7910	265	.	2.96786	28.7401	26.5927	583	Promoter (<=1kb)	4	16099228	16104515	5288	1	NM_169705	0	Akt1	Akt1
chr3R	16099636	16100162	Filter_SAM_or_BAM__output_SAM_or_BAM_on_data_207__bam_peak_7910	265	.	2.96786	28.7401	26.5927	583	Promoter (<=1kb)	4	16099228	16105670	6443	1	NM_001300425	409	Akt1	Akt1
chr2L	8381609	8381922	Filter_SAM_or_BAM__output_SAM_or_BAM_on_data_207__bam_peak_887	103	.	1.92308	12.0711	10.3143	139	Promoter (<=1kb)	1	8378262	8381764	3503	2	NM_078787	0	AlaRS	AlaRS
chr3L	5145931	5146182	Filter_SAM_or_BAM__output_SAM_or_BAM_on_data_207__bam_peak_4901	188	.	3.53829	20.8548	18.8776	150	Promoter (<=1kb)	3	5146098	5149852	3755	1	NM_079208	0	AlaRS-m	AlaRS-m
chr2R	9136719	9136883	Filter_SAM_or_BAM__output_SAM_or_BAM_on_data_207__bam_peak_2510	141	.	2.81242	16.0327	14.1705	54	Promoter (<=1kb)	2	9135375	9137370	1996	2	NM_206061	487	alc	alc
chr2R	9137832	9138060	Filter_SAM_or_BAM__output_SAM_or_BAM_on_data_207__bam_peak_2511	177	.	2.46521	19.6766	17.7267	90	Promoter (<=1kb)	2	9135375	9137933	2559	2	NM_136616	0	alc	alc
chr3R	26259768	26260068	Filter_SAM_or_BAM__output_SAM_or_BAM_on_data_207__bam_peak_8978	290	.	2.77363	31.2124	29.0147	331	Promoter (<=1kb)	4	26255204	26259835	4632	2	NM_170263	0	Ald1	Ald1
chr3R	26261168	26261791	Filter_SAM_or_BAM__output_SAM_or_BAM_on_data_207__bam_peak_8979	768	.	5.8768	80.0519	76.8441	372	Promoter (<=1kb)	4	26254069	26261591	7523	2	NM_170262	0	Ald1	Ald1
chr2L	9386344	9386582	Filter_SAM_or_BAM__output_SAM_or_BAM_on_data_207__bam_peak_995	273	.	3.29832	29.4912	27.3284	67	Promoter (<=1kb)	1	9387389	9391567	4179	1	NM_135441	-807	Aldh	Aldh
chr2L	9388092	9388464	Filter_SAM_or_BAM__output_SAM_or_BAM_on_data_207__bam_peak_998	616	.	4.90352	64.5253	61.6598	303	Promoter (<=1kb)	1	9387559	9391567	4009	1	NM_001273361	534	Aldh	Aldh
chr3R	17811087	17811638	Filter_SAM_or_BAM__output_SAM_or_BAM_on_data_207__bam_peak_8071	261	.	3.08663	28.2738	26.1359	401	Promoter (<=1kb)	4	17809401	17811134	1734	2	NM_142405	0	Alg1	Alg1
chr3L	3143712	3143977	Filter_SAM_or_BAM__output_SAM_or_BAM_on_data_207__bam_peak_4695	487	.	5.57962	51.3972	48.7972	102	Promoter (<=1kb)	3	3143808	3145284	1477	1	NM_139515	0	Alg2	Alg2
chr2R	23709734	23710007	Filter_SAM_or_BAM__output_SAM_or_BAM_on_data_207__bam_peak_4142	200	.	3.62902	22.0131	20.0094	156	Promoter (<=1kb)	2	23705439	23709792	4354	2	NM_079105	0	Alg3	Alg3
chr3R	25221429	25221673	Filter_SAM_or_BAM__output_SAM_or_BAM_on_data_207__bam_peak_8872	172	.	2.88819	19.1974	17.258	71	Promoter (<=1kb)	4	25221589	25224118	2530	1	NM_143096	0	Alg9	Alg9
chr3R	7107692	7108032	Filter_SAM_or_BAM__output_SAM_or_BAM_on_data_207__bam_peak_7000	729	.	4.75936	76.0467	72.9314	276	Promoter (<=1kb)	4	7094596	7108424	13829	2	NM_001104227	392	Alh	Alh
chr3R	7108343	7108724	Filter_SAM_or_BAM__output_SAM_or_BAM_on_data_207__bam_peak_7000	729	.	4.75936	76.0467	72.9314	276	Promoter (<=1kb)	4	7094596	7108424	13829	2	NM_001104227	0	Alh	Alh
chr3R	7123703	7124092	Filter_SAM_or_BAM__output_SAM_or_BAM_on_data_207__bam_peak_7004	82	.	2.29999	9.93065	8.23735	169	Promoter (<=1kb)	4	7097683	7123738	26056	2	NM_001275400	0	Alh	Alh
chr3R	7124145	7124697	Filter_SAM_or_BAM__output_SAM_or_BAM_on_data_207__bam_peak_7005	127	.	2.33602	14.6248	12.7992	424	Promoter (<=1kb)	4	7097683	7124185	26503	2	NM_001275399	0	Alh	Alh
chr3R	27699993	27700526	Filter_SAM_or_BAM__output_SAM_or_BAM_on_data_207__bam_peak_9101	478	.	3.97552	50.4457	47.8644	409	Promoter (<=1kb)	4	27696466	27700110	3645	2	NM_143325	0	ALiX	ALiX
chr2L	19425229	19425596	Filter_SAM_or_BAM__output_SAM_or_BAM_on_data_207__bam_peak_1840	1008	.	4.87329	104.66	100.864	1184	Promoter (<=1kb)	1	19426298	19429224	2927	1	NM_001273646	-702	Alp12	Alp12
chr2L	19425937	19426971	Filter_SAM_or_BAM__output_SAM_or_BAM_on_data_207__bam_peak_1840	1008	.	4.87329	104.66	100.864	1184	Promoter (<=1kb)	1	19426298	19429224	2927	1	NM_001273646	0	Alp12	Alp12
chr3R	29591596	29592008	Filter_SAM_or_BAM__output_SAM_or_BAM_on_data_207__bam_peak_9244	565	.	6.03325	59.2603	56.5047	164	Promoter (<=1kb)	4	29591831	29598942	7112	1	NM_001260427	0	alph	alph
chr3L	23337933	23338268	Filter_SAM_or_BAM__output_SAM_or_BAM_on_data_207__bam_peak_6690	173	.	2.45908	19.3186	17.3766	163	Promoter (<=1kb)	3	23318646	23338100	19455	2	NM_001300225	0	alpha-Cat	alpha-Cat
chr3R	7491378	7491940	Filter_SAM_or_BAM__output_SAM_or_BAM_on_data_207__bam_peak_7026	554	.	4.1699	58.2075	55.4742	384	Promoter (<=1kb)	4	7486583	7491603	5021	2	NM_079533	0	alpha-Est10	alpha-Est10
chr3R	7504896	7505367	Filter_SAM_or_BAM__output_SAM_or_BAM_on_data_207__bam_peak_7031	553	.	4.97647	58.0996	55.3681	291	Promoter (<=1kb)	4	7493921	7505098	11178	2	NM_169187	0	alpha-Est9	alpha-Est9
chrX	10325759	10325803	Filter_SAM_or_BAM__output_SAM_or_BAM_on_data_207__bam_peak_10535	111	.	2.60118	12.944	11.1633	256	Promoter (<=1kb)	6	10266792	10325958	59167	2	NM_167223	155	alpha-Man-Ia	alpha-Man-Ia
chr3R	15804046	15804272	Filter_SAM_or_BAM__output_SAM_or_BAM_on_data_207__bam_peak_7876	156	.	2.70982	17.5384	15.6385	89	Promoter (<=1kb)	4	15804248	15824118	19871	1	NM_142237	0	alpha-Man-IIb	alpha-Man-IIb
chr3L	20313585	20313786	Filter_SAM_or_BAM__output_SAM_or_BAM_on_data_207__bam_peak_6426	49	.	1.66635	6.53052	4.95289	36	Promoter (<=1kb)	3	20313632	20316577	2946	1	NM_079456	0	alphaSnap	alphaSnap
chr3R	7086264	7086921	Filter_SAM_or_BAM__output_SAM_or_BAM_on_data_207__bam_peak_6991	529	.	3.77085	55.6519	52.9699	354	Promoter (<=1kb)	4	7086599	7088839	2241	1	NM_057424	0	alphaTub84B	alphaTub84B
chrX	13845727	13846044	Filter_SAM_or_BAM__output_SAM_or_BAM_on_data_207__bam_peak_10871	86	.	2.33239	10.3168	8.61182	272	Promoter (<=1kb)	6	13830741	13845866	15126	2	NM_001258730	0	AMPdeam	AMPdeam
chr2R	12593392	12593835	Filter_SAM_or_BAM__output_SAM_or_BAM_on_data_207__bam_peak_2963	156	.	2.63995	17.5732	15.6725	92	Promoter (<=1kb)	2	12593604	12612068	18465	1	NM_001273990	0	Amph	Amph
chrX	11714737	11714938	Filter_SAM_or_BAM__output_SAM_or_BAM_on_data_207__bam_peak_10655	524	.	6.09758	55.1467	52.4744	175	Promoter (<=1kb)	6	11710824	11714905	4082	2	NM_001201651	0	Amun	Amun
chr2R	23693833	23694039	Filter_SAM_or_BAM__output_SAM_or_BAM_on_data_207__bam_peak_4138	61	.	1.92624	7.77196	6.14847	72	Promoter (<=1kb)	2	23694003	23695232	1230	1	NM_057856	0	angel	angel
chrX	17579058	17579278	Filter_SAM_or_BAM__output_SAM_or_BAM_on_data_207__bam_peak_11192	136	.	3.25933	15.5341	13.6846	132	Promoter (<=1kb)	6	17571854	17579229	7376	2	NM_001298446	0	Ankle2	Ankle2
chr4	132057	132336	Filter_SAM_or_BAM__output_SAM_or_BAM_on_data_207__bam_peak_9505	254	.	3.205	27.5224	25.4001	173	Promoter (<=1kb)	5	132220	140083	7864	1	NM_166728	0	anne	anne
chrX	10786669	10787102	Filter_SAM_or_BAM__output_SAM_or_BAM_on_data_207__bam_peak_10577	45	.	2.05978	6.08152	4.52221	162	Promoter (<=1kb)	6	10778954	10786907	7954	2	NM_176725	0	Ant2	Ant2
chr3R	21064888	21065478	Filter_SAM_or_BAM__output_SAM_or_BAM_on_data_207__bam_peak_8378	816	.	3.4587	85.0112	81.6903	291	Promoter (<=1kb)	4	21065241	21069754	4514	1	NM_001275868	0	AnxB9	AnxB9
chr2L	2161047	2161852	Filter_SAM_or_BAM__output_SAM_or_BAM_on_data_207__bam_peak_229	1024	.	6.84669	106.307	102.471	529	Promoter (<=1kb)	1	2156484	2161527	5044	2	NM_164457	0	aop	aop
chr2L	2162263	2163360	Filter_SAM_or_BAM__output_SAM_or_BAM_on_data_207__bam_peak_230	851	.	5.71799	88.5317	85.1258	168	Promoter (<=1kb)	1	2156792	2161527	4736	2	NM_001272980	-737	aop	aop
chr2L	2177794	2178266	Filter_SAM_or_BAM__output_SAM_or_BAM_on_data_207__bam_peak_242	510	.	3.83729	53.669	51.0251	263	Promoter (<=1kb)	1	2156484	2178754	22271	2	NM_001272979	488	aop	aop
chr2L	2178564	2179001	Filter_SAM_or_BAM__output_SAM_or_BAM_on_data_207__bam_peak_243	732	.	5.00053	76.3554	73.2335	383	Promoter (<=1kb)	1	2156484	2178754	22271	2	NM_001272979	0	aop	aop
chr3L	16484032	16484280	Filter_SAM_or_BAM__output_SAM_or_BAM_on_data_207__bam_peak_5968	111	.	3.44208	12.9711	11.1891	163	Promoter (<=1kb)	3	16470386	16483650	13265	2	NM_079383	-383	aos	aos
chr3R	12433776	12434194	Filter_SAM_or_BAM__output_SAM_or_BAM_on_data_207__bam_peak_7546	43	.	1.83886	5.89511	4.34227	278	Promoter (<=1kb)	4	12432533	12433822	1290	2	NM_141941	0	Aos1	Aos1
chr3R	15537057	15537521	Filter_SAM_or_BAM__output_SAM_or_BAM_on_data_207__bam_peak_7856	470	.	3.23441	49.5983	47.0336	401	Promoter (<=1kb)	4	15532137	15537292	5156	2	NM_142218	0	AOX1	AOX1
chr3R	15547440	15547737	Filter_SAM_or_BAM__output_SAM_or_BAM_on_data_207__bam_peak_7858	251	.	3.44019	27.2702	25.1531	111	Promoter (<=1kb)	4	15542748	15547736	4989	2	NM_142220	0	AOX3	AOX3
chr3R	15547801	15547889	Filter_SAM_or_BAM__output_SAM_or_BAM_on_data_207__bam_peak_7859	141	.	2.34574	15.9697	14.109	164	Promoter (<=1kb)	4	15542748	15547736	4989	2	NM_142220	-66	AOX3	AOX3
chr3R	15548130	15548494	Filter_SAM_or_BAM__output_SAM_or_BAM_on_data_207__bam_peak_7859	141	.	2.34574	15.9697	14.109	164	Promoter (<=1kb)	4	15542748	15548188	5441	2	NM_001316510	0	AOX3	AOX3
chr2R	5726572	5727397	Filter_SAM_or_BAM__output_SAM_or_BAM_on_data_207__bam_peak_2137	457	.	3.46039	48.3232	45.784	535	Promoter (<=1kb)	2	5706202	5726832	20631	2	NM_165445	0	ap	ap
chrX	9110477	9110771	Filter_SAM_or_BAM__output_SAM_or_BAM_on_data_207__bam_peak_10443	195	.	3.18515	21.4923	19.5006	149	Promoter (<=1kb)	6	9110642	9117741	7100	1	NM_001258660	0	AP-1gamma	AP-1gamma
chr3R	9559490	9559747	Filter_SAM_or_BAM__output_SAM_or_BAM_on_data_207__bam_peak_7266	128	.	2.59044	14.6435	12.8173	84	Promoter (<=1kb)	4	9557712	9559525	1814	2	NM_141649	0	AP-1mu	AP-1mu
chr3R	23958359	23958772	Filter_SAM_or_BAM__output_SAM_or_BAM_on_data_207__bam_peak_8734	126	.	2.68605	14.4346	12.6138	174	Promoter (<=1kb)	4	23958651	23960232	1582	1	NM_001275963	0	AP-1sigma	AP-1sigma
chr2L	414677	414853	Filter_SAM_or_BAM__output_SAM_or_BAM_on_data_207__bam_peak_61	272	.	3.93368	29.4065	27.2452	71	Promoter (<=1kb)	1	408030	414777	6748	2	NM_057471	0	AP-2alpha	AP-2alpha
chr3R	28842567	28842931	Filter_SAM_or_BAM__output_SAM_or_BAM_on_data_207__bam_peak_9164	146	.	3.13113	16.5374	14.6626	155	Promoter (<=1kb)	4	28832301	28842283	9983	2	NM_001276117	-285	Apc	Apc
chr3R	28843640	28843950	Filter_SAM_or_BAM__output_SAM_or_BAM_on_data_207__bam_peak_9165	76	.	2.08057	9.35622	7.68081	271	Promoter (<=1kb)	4	28832301	28844748	12448	2	NM_001316494	798	Apc	Apc
chr3R	28844415	28845375	Filter_SAM_or_BAM__output_SAM_or_BAM_on_data_207__bam_peak_9166	820	.	6.33642	85.3776	82.0481	867	Promoter (<=1kb)	4	28832301	28844748	12448	2	NM_001316494	0	Apc	Apc
chr2L	9938668	9938954	Filter_SAM_or_BAM__output_SAM_or_BAM_on_data_207__bam_peak_1077	196	.	2.3785	21.6888	19.6924	191	Promoter (<=1kb)	1	9938178	9938790	613	2	NM_164880	0	Apf	Apf
chr2R	14962788	14963452	Filter_SAM_or_BAM__output_SAM_or_BAM_on_data_207__bam_peak_3248	239	.	2.88367	26.0907	23.9986	166	Promoter (<=1kb)	2	14944458	14962969	18512	2	NM_080153	0	aPKC	aPKC
chr3L	16595072	16595490	Filter_SAM_or_BAM__output_SAM_or_BAM_on_data_207__bam_peak_5980	143	.	3.33449	16.2286	14.3617	167	Promoter (<=1kb)	3	16595181	16600459	5279	1	NM_001300155	0	Apl	Apl
chr3L	12265847	12265966	Filter_SAM_or_BAM__output_SAM_or_BAM_on_data_207__bam_peak_5589	473	.	4.25285	49.9701	47.3984	158	Promoter (<=1kb)	3	12206238	12265746	59509	2	NM_001300114	-102	app	app
chr3L	1884778	1885124	Filter_SAM_or_BAM__output_SAM_or_BAM_on_data_207__bam_peak_4568	678	.	4.56078	70.8594	67.8578	182	Promoter (<=1kb)	3	1883795	1884892	1098	2	NM_001299979	0	Aprt	Aprt
chr3L	10898878	10899587	Filter_SAM_or_BAM__output_SAM_or_BAM_on_data_207__bam_peak_5458	447	.	3.7318	47.299	44.7802	390	Promoter (<=1kb)	3	10894776	10899123	4348	2	NM_168426	0	Aps	Aps
chr2R	23564764	23565006	Filter_SAM_or_BAM__output_SAM_or_BAM_on_data_207__bam_peak_4122	105	.	3.21186	12.2851	10.5225	153	Promoter (<=1kb)	2	23564891	23599526	34636	1	NM_057831	0	apt	apt
chr2R	23580469	23581172	Filter_SAM_or_BAM__output_SAM_or_BAM_on_data_207__bam_peak_4124	684	.	6.3005	71.489	68.4744	182	Promoter (<=1kb)	2	23581090	23599526	18437	1	NM_057832	0	apt	apt
chr3R	8820594	8820866	Filter_SAM_or_BAM__output_SAM_or_BAM_on_data_207__bam_peak_7156	368	.	5.13388	39.241	36.8826	187	Promoter (<=1kb)	4	8813490	8820682	7193	2	NM_001275461	0	aqz	aqz
chr2R	14360077	14360511	Filter_SAM_or_BAM__output_SAM_or_BAM_on_data_207__bam_peak_3195	556	.	6.08453	58.4253	55.6877	258	Promoter (<=1kb)	2	14357927	14360297	2371	2	NM_137111	0	Arc1	Arc1
chr2R	14361663	14362136	Filter_SAM_or_BAM__output_SAM_or_BAM_on_data_207__bam_peak_3196	351	.	4.94803	37.5191	35.1949	237	Promoter (<=1kb)	2	14361924	14362825	902	1	NM_137112	0	Arc2	Arc2
chr3R	21662590	21663061	Filter_SAM_or_BAM__output_SAM_or_BAM_on_data_207__bam_peak_8484	265	.	2.591	28.7383	26.5911	197	Promoter (<=1kb)	4	21661186	21662972	1787	2	NM_142718	0	Archease	Archease
chr4	1124027	1124287	Filter_SAM_or_BAM__output_SAM_or_BAM_on_data_207__bam_peak_9578	153	.	2.43199	17.2172	15.3254	182	Promoter (<=1kb)	5	1124167	1125113	947	1	NM_001272158	0	Arf102F	Arf102F
chr2R	15322375	15323166	Filter_SAM_or_BAM__output_SAM_or_BAM_on_data_207__bam_peak_3277	436	.	3.15015	46.1623	43.6656	712	Promoter (<=1kb)	2	15322501	15324892	2392	1	NM_079027	0	Arf51F	Arf51F
chr3L	22871299	22872431	Filter_SAM_or_BAM__output_SAM_or_BAM_on_data_207__bam_peak_6671	538	.	3.77881	56.5712	53.8711	857	Promoter (<=1kb)	3	22868380	22872052	3673	2	NM_168972	0	Arf79F	Arf79F
chr3L	12417438	12417732	Filter_SAM_or_BAM__output_SAM_or_BAM_on_data_207__bam_peak_5604	202	.	3.79849	22.2088	20.2009	145	Promoter (<=1kb)	3	12415026	12417580	2555	2	NM_001274832	0	ArfGAP1	ArfGAP1
chr3L	22717186	22717445	Filter_SAM_or_BAM__output_SAM_or_BAM_on_data_207__bam_peak_6653	182	.	2.94774	20.1624	18.201	150	Promoter (<=1kb)	3	22714408	22717276	2869	2	NM_001104194	0	ArfGAP3	ArfGAP3
chrX	15844188	15844432	Filter_SAM_or_BAM__output_SAM_or_BAM_on_data_207__bam_peak_11009	31	.	1.63987	4.60083	3.10571	17	Promoter (<=1kb)	6	15841769	15844145	2377	2	NM_132853	-44	ArgRS	ArgRS
chr3R	7886943	7887248	Filter_SAM_or_BAM__output_SAM_or_BAM_on_data_207__bam_peak_7051	123	.	2.5847	14.144	12.3307	163	Promoter (<=1kb)	4	7887045	7889336	2292	1	NM_141488	0	ArgRS-m	ArgRS-m
chrX	18137505	18137936	Filter_SAM_or_BAM__output_SAM_or_BAM_on_data_207__bam_peak_11246	283	.	4.6741	30.4983	28.315	302	Promoter (<=1kb)	6	18130392	18137685	7294	2	NM_001258807	0	ari-1	ari-1
chr2R	22212394	22213050	Filter_SAM_or_BAM__output_SAM_or_BAM_on_data_207__bam_peak_4010	238	.	2.86365	25.9877	23.8977	551	Promoter (<=1kb)	2	22212835	22217264	4430	1	NM_058026	0	ari-2	ari-2
chr3L	15982813	15983194	Filter_SAM_or_BAM__output_SAM_or_BAM_on_data_207__bam_peak_5905	174	.	3.57772	19.4439	17.499	185	Promoter (<=1kb)	3	15983135	15984362	1228	1	NM_079374	0	Arl1	Arl1
chr3R	8340907	8341188	Filter_SAM_or_BAM__output_SAM_or_BAM_on_data_207__bam_peak_7116	129	.	2.82752	14.7812	12.9511	81	Promoter (<=1kb)	4	8341100	8341872	773	1	NM_057538	0	Arl2	Arl2
chr4	179309	179639	Filter_SAM_or_BAM__output_SAM_or_BAM_on_data_207__bam_peak_9507	278	.	3.12734	30.0148	27.8412	144	Promoter (<=1kb)	5	177348	179389	2042	2	NM_001258479	0	Arl4	Arl4
chr3L	8299239	8300101	Filter_SAM_or_BAM__output_SAM_or_BAM_on_data_207__bam_peak_5162	476	.	4.24874	50.2144	47.6381	150	Promoter (<=1kb)	3	8298501	8299839	1339	2	NM_139944	0	Arl5	Arl5
chr3R	16643582	16643835	Filter_SAM_or_BAM__output_SAM_or_BAM_on_data_207__bam_peak_7982	228	.	3.43356	24.9052	22.8381	132	Promoter (<=1kb)	4	16643605	16645171	1567	1	NM_142313	0	Arl6IP1	Arl6IP1
chr3R	8126800	8127206	Filter_SAM_or_BAM__output_SAM_or_BAM_on_data_207__bam_peak_7087	280	.	2.9667	30.209	28.0317	1152	Promoter (<=1kb)	4	8126605	8129835	3231	1	NM_001300297	196	Arl8	Arl8
chr3R	8127325	8127555	Filter_SAM_or_BAM__output_SAM_or_BAM_on_data_207__bam_peak_7087	280	.	2.9667	30.209	28.0317	1152	Promoter (<=1kb)	4	8126605	8129835	3231	1	NM_001300297	721	Arl8	Arl8
chr3R	8126213	8126747	Filter_SAM_or_BAM__output_SAM_or_BAM_on_data_207__bam_peak_7087	280	.	2.9667	30.209	28.0317	1152	Promoter (<=1kb)	4	8126605	8128850	2246	1	NM_141512	0	Arl8	Arl8
chrX	1899628	1900204	Filter_SAM_or_BAM__output_SAM_or_BAM_on_data_207__bam_peak_9734	474	.	5.41293	49.9932	47.4212	188	Promoter (<=1kb)	6	1891401	1900173	8773	2	NM_057318	0	arm	arm
chr3R	12691352	12691915	Filter_SAM_or_BAM__output_SAM_or_BAM_on_data_207__bam_peak_7570	212	.	3.32951	23.2601	21.2286	255	Promoter (<=1kb)	4	12691743	12694232	2490	1	NM_079607	0	Arp1	Arp1
chrX	16552758	16553234	Filter_SAM_or_BAM__output_SAM_or_BAM_on_data_207__bam_peak_11090	1254	.	8.92571	129.911	125.499	259	Promoter (<=1kb)	6	16548290	16553951	5662	2	NM_001103531	717	Arp2	Arp2
chrX	16553706	16554112	Filter_SAM_or_BAM__output_SAM_or_BAM_on_data_207__bam_peak_11091	111	.	2.85785	12.9074	11.1279	214	Promoter (<=1kb)	6	16548290	16553951	5662	2	NM_001103531	0	Arp2	Arp2
chr3R	18185546	18185757	Filter_SAM_or_BAM__output_SAM_or_BAM_on_data_207__bam_peak_8088	99	.	2.46215	11.649	9.90458	94	Promoter (<=1kb)	4	18185738	18187875	2138	1	NM_001275768	0	Arp5	Arp5
chr2L	13829655	13830034	Filter_SAM_or_BAM__output_SAM_or_BAM_on_data_207__bam_peak_1413	145	.	2.4994	16.4191	14.5472	156	Promoter (<=1kb)	1	13827941	13829741	1801	2	NM_057248	0	Arpc1	Arpc1
chr2L	20416985	20417744	Filter_SAM_or_BAM__output_SAM_or_BAM_on_data_207__bam_peak_1920	382	.	3.62041	40.6467	38.2598	440	Promoter (<=1kb)	1	20417057	20423027	5971	1	NM_001299173	0	Arpc2	Arpc2
chr2L	6124828	6125147	Filter_SAM_or_BAM__output_SAM_or_BAM_on_data_207__bam_peak_625	186	.	3.35219	20.5761	18.605	281	Promoter (<=1kb)	1	6125132	6125911	780	1	NM_135152	0	Arpc4	Arpc4
chr2R	13482985	13483452	Filter_SAM_or_BAM__output_SAM_or_BAM_on_data_207__bam_peak_3068	326	.	3.63632	34.9387	32.6659	282	Promoter (<=1kb)	2	13453640	13483229	29590	2	NM_079998	0	arr	arr
chr2R	6085514	6085770	Filter_SAM_or_BAM__output_SAM_or_BAM_on_data_207__bam_peak_2162	348	.	3.35014	37.2101	34.892	148	Promoter (<=1kb)	2	6080828	6085625	4798	2	NM_001273790	0	Ars2	Ars2
chr3R	9985819	9986499	Filter_SAM_or_BAM__output_SAM_or_BAM_on_data_207__bam_peak_7312	371	.	4.36755	39.4755	37.1121	476	Promoter (<=1kb)	4	9982816	9986060	3245	2	NM_001275516	0	Art4	Art4
chr2R	23079007	23079420	Filter_SAM_or_BAM__output_SAM_or_BAM_on_data_207__bam_peak_4086	387	.	3.89407	41.1746	38.7775	275	Promoter (<=1kb)	2	23076688	23079038	2351	2	NM_137909	0	Art7	Art7
chr2L	11010998	11011228	Filter_SAM_or_BAM__output_SAM_or_BAM_on_data_207__bam_peak_1178	199	.	2.89074	21.9046	19.9034	128	Promoter (<=1kb)	1	11009821	11011086	1266	2	NM_135634	0	Art8	Art8
chr2L	866847	867136	Filter_SAM_or_BAM__output_SAM_or_BAM_on_data_207__bam_peak_129	479	.	3.82517	50.5739	47.9901	1493	Promoter (<=1kb)	1	861849	868013	6165	2	NM_164395	877	aru	aru
chr3L	21529213	21529454	Filter_SAM_or_BAM__output_SAM_or_BAM_on_data_207__bam_peak_6572	90	.	2.12789	10.8149	9.09421	124	Promoter (<=1kb)	3	21528218	21529333	1116	2	NM_001144523	0	Arv1	Arv1
chr2R	8122914	8123156	Filter_SAM_or_BAM__output_SAM_or_BAM_on_data_207__bam_peak_2407	269	.	4.20969	29.0859	26.9312	162	Promoter (<=1kb)	2	8114286	8123001	8716	2	NM_001169614	0	Asap	Asap
chr4	486410	486915	Filter_SAM_or_BAM__output_SAM_or_BAM_on_data_207__bam_peak_9532	267	.	2.98907	28.8589	26.709	312	Promoter (<=1kb)	5	472895	486033	13139	2	NM_001272128	-378	Asator	Asator
chr3L	3165011	3165361	Filter_SAM_or_BAM__output_SAM_or_BAM_on_data_207__bam_peak_4701	470	.	4.49763	49.5862	47.0217	171	Promoter (<=1kb)	3	3163786	3165088	1303	2	NM_139519	0	Asciz	Asciz
chr3L	19618378	19619046	Filter_SAM_or_BAM__output_SAM_or_BAM_on_data_207__bam_peak_6345	442	.	4.81406	46.7128	44.2058	540	Promoter (<=1kb)	3	19618894	19620022	1129	1	NM_001202202	0	asf1	asf1
chr3R	24651033	24651539	Filter_SAM_or_BAM__output_SAM_or_BAM_on_data_207__bam_peak_8823	1413	.	9.62469	146.203	141.337	262	Promoter (<=1kb)	4	24651180	24653376	2197	1	NM_001260363	0	ash2	ash2
chr3R	19879504	19879810	Filter_SAM_or_BAM__output_SAM_or_BAM_on_data_207__bam_peak_8263	157	.	3.06306	17.6047	15.7031	138	Promoter (<=1kb)	4	19879719	19886030	6312	1	NM_057741	0	Ask1	Ask1
chr3R	5606484	5606876	Filter_SAM_or_BAM__output_SAM_or_BAM_on_data_207__bam_peak_6880	224	.	2.62944	24.4627	22.4053	187	Promoter (<=1kb)	4	5603236	5606543	3308	2	NM_141300	0	asl	asl
chr3L	21172971	21173215	Filter_SAM_or_BAM__output_SAM_or_BAM_on_data_207__bam_peak_6518	960	.	6.07637	99.6906	96.018	179	Promoter (<=1kb)	3	21173118	21174973	1856	1	NM_206410	0	AsnS	AsnS
chr3R	24753605	24753984	Filter_SAM_or_BAM__output_SAM_or_BAM_on_data_207__bam_peak_8831	174	.	2.83536	19.3572	17.4144	190	Promoter (<=1kb)	4	24753849	24760513	6665	1	NM_079764	0	asp	asp
chr2R	21251447	21251818	Filter_SAM_or_BAM__output_SAM_or_BAM_on_data_207__bam_peak_3909	111	.	3.44208	12.9711	11.1891	269	Promoter (<=1kb)	2	21217856	21251150	33295	2	NM_001274193	-298	ASPP	ASPP
chr2R	12880144	12880477	Filter_SAM_or_BAM__output_SAM_or_BAM_on_data_207__bam_peak_2998	288	.	3.6641	31.0242	28.8303	182	Promoter (<=1kb)	2	12880284	12883168	2885	1	NM_057261	0	AspRS	AspRS
chr3R	13465736	13466635	Filter_SAM_or_BAM__output_SAM_or_BAM_on_data_207__bam_peak_7634	1092	.	7.59874	113.211	109.206	725	Promoter (<=1kb)	4	13455511	13466106	10596	2	NR_048380	0	asRNA:CR17025	asRNA:CR17025
chr2R	24793819	24794042	Filter_SAM_or_BAM__output_SAM_or_BAM_on_data_207__bam_peak_4272	634	.	5.58387	66.3118	63.4082	254	Promoter (<=1kb)	2	24793807	24795772	1966	1	NR_048202	13	asRNA:CR43257	asRNA:CR43257
chr3R	4452427	4452622	Filter_SAM_or_BAM__output_SAM_or_BAM_on_data_207__bam_peak_6757	292	.	3.39098	31.5026	29.2991	146	Promoter (<=1kb)	4	4452705	4454295	1591	1	NR_125062	-83	asRNA:CR43629	asRNA:CR43629
chr3L	19908357	19908660	Filter_SAM_or_BAM__output_SAM_or_BAM_on_data_207__bam_peak_6387	409	.	3.0017	43.3946	40.9535	197	Promoter (<=1kb)	3	19909365	19910203	839	1	NR_073953	-705	asRNA:CR43889	asRNA:CR43889
chr2R	16221566	16222022	Filter_SAM_or_BAM__output_SAM_or_BAM_on_data_207__bam_peak_3385	239	.	2.38728	26.0223	23.9317	338	Promoter (<=1kb)	2	16221636	16223187	1552	1	NR_073879	0	asRNA:CR43898	asRNA:CR43898
chr4	56237	56733	Filter_SAM_or_BAM__output_SAM_or_BAM_on_data_207__bam_peak_9497	610	.	3.87326	63.8747	61.0231	224	Promoter (<=1kb)	5	56497	60974	4478	1	NR_073612	0	asRNA:CR43957	asRNA:CR43957
chr2R	18774809	18775066	Filter_SAM_or_BAM__output_SAM_or_BAM_on_data_207__bam_peak_3687	256	.	3.60697	27.7329	25.6064	85	Promoter (<=1kb)	2	18775411	18777166	1756	1	NR_073888	-345	asRNA:CR43964	asRNA:CR43964
chr2R	18775197	18775556	Filter_SAM_or_BAM__output_SAM_or_BAM_on_data_207__bam_peak_3688	281	.	2.98676	30.327	28.1472	170	Promoter (<=1kb)	2	18775411	18777166	1756	1	NR_073888	0	asRNA:CR43964	asRNA:CR43964
chr3R	5251167	5251261	Filter_SAM_or_BAM__output_SAM_or_BAM_on_data_207__bam_peak_6833	106	.	2.21604	12.4175	10.6509	332	Promoter (<=1kb)	4	5250913	5252132	1220	1	NR_156772	255	asRNA:CR44019	asRNA:CR44019
chr4	959859	959960	Filter_SAM_or_BAM__output_SAM_or_BAM_on_data_207__bam_peak_9564	118	.	2.48978	13.6802	11.879	64	Promoter (<=1kb)	5	959675	962692	3018	1	NR_123752	185	asRNA:CR44030	asRNA:CR44030
chr3R	5658917	5659130	Filter_SAM_or_BAM__output_SAM_or_BAM_on_data_207__bam_peak_6890	53	.	1.76087	6.90041	5.30884	125	Promoter (<=1kb)	4	5659477	5660570	1094	1	NR_073985	-347	asRNA:CR44093	asRNA:CR44093
chr2L	2228103	2228566	Filter_SAM_or_BAM__output_SAM_or_BAM_on_data_207__bam_peak_259	417	.	3.24009	44.227	41.7694	580	Promoter (<=1kb)	1	2226753	2227604	852	2	NR_073695	-500	asRNA:CR44114	asRNA:CR44114
chrX	17578313	17578523	Filter_SAM_or_BAM__output_SAM_or_BAM_on_data_207__bam_peak_11191	78	.	2.824	9.55647	7.87465	42	Promoter (<=1kb)	6	17578689	17579135	447	1	NR_073661	-166	asRNA:CR44124	asRNA:CR44124
chr2R	6872794	6873099	Filter_SAM_or_BAM__output_SAM_or_BAM_on_data_207__bam_peak_2242	113	.	2.70441	13.1464	11.36	150	Promoter (<=1kb)	2	6873149	6880088	6940	1	NR_073846	-50	asRNA:CR44169	asRNA:CR44169
chr3R	25493273	25493683	Filter_SAM_or_BAM__output_SAM_or_BAM_on_data_207__bam_peak_8901	278	.	3.46108	30.0364	27.8625	290	Promoter (<=1kb)	4	25491285	25493262	1978	2	NR_074059	-12	asRNA:CR44179	asRNA:CR44179
chrX	19495823	19496137	Filter_SAM_or_BAM__output_SAM_or_BAM_on_data_207__bam_peak_11355	493	.	5.89765	51.9359	49.3262	157	Promoter (<=1kb)	6	19495285	19495896	612	2	NR_123958	0	asRNA:CR44340	asRNA:CR44340
chr2R	16583348	16583619	Filter_SAM_or_BAM__output_SAM_or_BAM_on_data_207__bam_peak_3410	403	.	4.54953	42.8154	40.3852	102	Promoter (<=1kb)	2	16581996	16583369	1374	2	NR_124576	0	asRNA:CR44375	asRNA:CR44375
chr2R	16583746	16584328	Filter_SAM_or_BAM__output_SAM_or_BAM_on_data_207__bam_peak_3411	1278	.	5.93235	132.323	127.85	330	Promoter (<=1kb)	2	16581996	16583369	1374	2	NR_124576	-378	asRNA:CR44375	asRNA:CR44375
chrX	19668455	19669010	Filter_SAM_or_BAM__output_SAM_or_BAM_on_data_207__bam_peak_11370	877	.	7.35017	91.2117	87.7412	325	Promoter (<=1kb)	6	19667018	19667746	729	2	NR_123959	-710	asRNA:CR44512	asRNA:CR44512
chr2L	13385433	13385648	Filter_SAM_or_BAM__output_SAM_or_BAM_on_data_207__bam_peak_1373	65	.	1.87909	8.19109	6.55316	114	Promoter (<=1kb)	1	13384822	13385403	582	2	NR_124233	-31	asRNA:CR44599	asRNA:CR44599
chr2R	21298603	21298873	Filter_SAM_or_BAM__output_SAM_or_BAM_on_data_207__bam_peak_3915	401	.	3.03316	42.5399	40.1155	157	Promoter (<=1kb)	2	21297495	21298495	1001	2	NR_124675	-109	asRNA:CR44724	asRNA:CR44724
chr2L	20069244	20069491	Filter_SAM_or_BAM__output_SAM_or_BAM_on_data_207__bam_peak_1888	60	.	2.18079	7.67682	6.05844	195	Promoter (<=1kb)	1	20068793	20069318	526	2	NR_124391	0	asRNA:CR44907	asRNA:CR44907
chr2L	122298	122636	Filter_SAM_or_BAM__output_SAM_or_BAM_on_data_207__bam_peak_19	325	.	3.16478	34.8202	32.5498	191	Promoter (<=1kb)	1	122837	124031	1195	1	NR_123999	-201	asRNA:CR44969	asRNA:CR44969
chr2L	73791	74188	Filter_SAM_or_BAM__output_SAM_or_BAM_on_data_207__bam_peak_10	152	.	2.07139	17.0997	15.2107	269	Promoter (<=1kb)	1	71039	73836	2798	2	NR_123997	0	asRNA:CR44987	asRNA:CR44987
chr2L	8702312	8702639	Filter_SAM_or_BAM__output_SAM_or_BAM_on_data_207__bam_peak_935	118	.	2.47041	13.6296	11.8299	318	Promoter (<=1kb)	1	8703475	8705450	1976	1	NR_124147	-836	asRNA:CR44992	asRNA:CR44992
chrX	23007590	23007877	Filter_SAM_or_BAM__output_SAM_or_BAM_on_data_207__bam_peak_11508	318	.	4.20617	34.0667	31.8111	193	Promoter (<=1kb)	6	23007672	23009452	1781	1	NR_123993	0	asRNA:CR45009	asRNA:CR45009
chr3R	20675824	20676101	Filter_SAM_or_BAM__output_SAM_or_BAM_on_data_207__bam_peak_8328	572	.	5.42304	59.9911	57.2213	149	Promoter (<=1kb)	4	20677080	20677858	779	1	NR_125216	-979	asRNA:CR45024	asRNA:CR45024
chr2R	10476873	10477056	Filter_SAM_or_BAM__output_SAM_or_BAM_on_data_207__bam_peak_2691	268	.	3.53791	28.9812	26.8294	123	Promoter (<=1kb)	2	10478043	10478795	753	1	NR_124502	-987	asRNA:CR45134	asRNA:CR45134
chr2R	10540281	10540777	Filter_SAM_or_BAM__output_SAM_or_BAM_on_data_207__bam_peak_2702	647	.	5.04199	67.7319	64.798	381	Promoter (<=1kb)	2	10541595	10541995	401	1	NR_124504	-818	asRNA:CR45135	asRNA:CR45135
chr2R	10541455	10541962	Filter_SAM_or_BAM__output_SAM_or_BAM_on_data_207__bam_peak_2703	567	.	4.21356	59.4751	56.7151	238	Promoter (<=1kb)	2	10541595	10541995	401	1	NR_124504	0	asRNA:CR45135	asRNA:CR45135
chr2R	12883107	12883427	Filter_SAM_or_BAM__output_SAM_or_BAM_on_data_207__bam_peak_2999	145	.	2.40379	16.4639	14.5912	174	Promoter (<=1kb)	2	12881445	12883253	1809	2	NR_124535	0	asRNA:CR45141	asRNA:CR45141
chr2R	9564960	9566111	Filter_SAM_or_BAM__output_SAM_or_BAM_on_data_207__bam_peak_2570	1221	.	8.04632	126.513	122.183	350	Promoter (<=1kb)	2	9559255	9565046	5792	2	NR_124486	0	asRNA:CR45281	asRNA:CR45281
chrX	5518080	5518514	Filter_SAM_or_BAM__output_SAM_or_BAM_on_data_207__bam_peak_10070	988	.	6.55053	102.577	98.8328	310	Promoter (<=1kb)	6	5516993	5517500	508	2	NR_123799	-581	asRNA:CR45518	asRNA:CR45518
chrX	7959075	7959402	Filter_SAM_or_BAM__output_SAM_or_BAM_on_data_207__bam_peak_10328	205	.	3.34845	22.5466	20.5312	135	Promoter (<=1kb)	6	7959274	7960898	1625	1	NR_123834	0	asRNA:CR45620	asRNA:CR45620
chr3L	16318560	16318954	Filter_SAM_or_BAM__output_SAM_or_BAM_on_data_207__bam_peak_5947	813	.	6.08587	84.6243	81.312	146	Promoter (<=1kb)	3	16318941	16319263	323	1	NR_124958	0	asRNA:CR45663	asRNA:CR45663
chr3L	12491173	12491524	Filter_SAM_or_BAM__output_SAM_or_BAM_on_data_207__bam_peak_5610	140	.	2.64315	15.9136	14.0548	73	Promoter (<=1kb)	3	12491840	12493605	1766	1	NR_124905	-316	asRNA:CR45682	asRNA:CR45682
chr3L	9692521	9692884	Filter_SAM_or_BAM__output_SAM_or_BAM_on_data_207__bam_peak_5332	473	.	3.49856	49.9564	47.385	280	Promoter (<=1kb)	3	9693821	9694705	885	1	NR_133199	-937	asRNA:CR45804	asRNA:CR45804
chr3L	16612944	16613255	Filter_SAM_or_BAM__output_SAM_or_BAM_on_data_207__bam_peak_5983	106	.	2.20503	12.4004	10.6343	278	Promoter (<=1kb)	3	16612500	16612827	328	2	NR_133253	-118	asRNA:CR45865	asRNA:CR45865
chr3R	15803594	15803823	Filter_SAM_or_BAM__output_SAM_or_BAM_on_data_207__bam_peak_7875	164	.	2.5818	18.4032	16.4831	86	Promoter (<=1kb)	4	15802854	15803495	642	2	NR_133405	-100	asRNA:CR45891	asRNA:CR45891
chr3L	16588006	16588221	Filter_SAM_or_BAM__output_SAM_or_BAM_on_data_207__bam_peak_5979	75	.	2.46442	9.21257	7.54134	160	Promoter (<=1kb)	3	16587111	16587805	695	2	NR_133252	-202	asRNA:CR45895	asRNA:CR45895
chr3L	18865471	18865681	Filter_SAM_or_BAM__output_SAM_or_BAM_on_data_207__bam_peak_6268	90	.	2.17964	10.7392	9.02062	112	Promoter (<=1kb)	3	18858690	18866107	7418	2	NR_133272	426	asRNA:CR45912	asRNA:CR45912
chr3L	19294296	19295204	Filter_SAM_or_BAM__output_SAM_or_BAM_on_data_207__bam_peak_6325	382	.	3.22944	40.6594	38.2723	787	Promoter (<=1kb)	3	19294727	19295198	472	2	NR_133278	0	asRNA:CR46048	asRNA:CR46048
chr3R	24320347	24320694	Filter_SAM_or_BAM__output_SAM_or_BAM_on_data_207__bam_peak_8795	397	.	3.84459	42.1464	39.7294	913	Promoter (<=1kb)	4	24318816	24319782	967	2	NR_133441	-566	asRNA:CR46093	asRNA:CR46093
chr3R	16263932	16264370	Filter_SAM_or_BAM__output_SAM_or_BAM_on_data_207__bam_peak_7944	1350	.	10.9065	139.738	135.065	250	Promoter (<=1kb)	4	16264271	16266891	2621	1	NM_079655	0	asun	asun
chr2R	14503851	14504465	Filter_SAM_or_BAM__output_SAM_or_BAM_on_data_207__bam_peak_3204	96	.	2.18153	11.3921	9.65462	549	Promoter (<=1kb)	2	14503958	14512493	8536	1	NM_001274041	0	Asx	Asx
chr2L	6960222	6960505	Filter_SAM_or_BAM__output_SAM_or_BAM_on_data_207__bam_peak_702	89	.	1.99526	10.6585	8.94342	128	Promoter (<=1kb)	1	6959099	6960328	1230	2	NM_135244	0	Atac1	Atac1
chr3L	327883	328316	Filter_SAM_or_BAM__output_SAM_or_BAM_on_data_207__bam_peak_4364	79	.	2.04994	9.60688	7.92395	79	Promoter (<=1kb)	3	324985	327992	3008	2	NM_001259602	0	Atac3	Atac3
chr2L	4333049	4334147	Filter_SAM_or_BAM__output_SAM_or_BAM_on_data_207__bam_peak_462	551	.	3.40344	57.9071	55.1793	797	Promoter (<=1kb)	1	4333913	4345411	11499	1	NM_078747	0	Atet	Atet
chr2R	24869863	24870201	Filter_SAM_or_BAM__output_SAM_or_BAM_on_data_207__bam_peak_4278	199	.	2.60045	21.9157	19.9143	187	Promoter (<=1kb)	2	24870108	24871509	1402	1	NM_001038884	0	Atf-2	Atf-2
chr2R	5144495	5144790	Filter_SAM_or_BAM__output_SAM_or_BAM_on_data_207__bam_peak_2114	335	.	4.48675	35.8797	33.5882	177	Promoter (<=1kb)	2	5144733	5154194	9462	1	NM_206023	0	Atf6	Atf6
chr3R	8349715	8350032	Filter_SAM_or_BAM__output_SAM_or_BAM_on_data_207__bam_peak_7117	103	.	2.2525	12.1517	10.3928	153	Promoter (<=1kb)	4	8349815	8352817	3003	1	NM_141539	0	Atg13	Atg13
chr3R	29116265	29116465	Filter_SAM_or_BAM__output_SAM_or_BAM_on_data_207__bam_peak_9197	84	.	2.19041	10.1007	8.40162	145	Promoter (<=1kb)	4	29116391	29118390	2000	1	NM_143412	0	Atg14	Atg14
chr3R	5669521	5670007	Filter_SAM_or_BAM__output_SAM_or_BAM_on_data_207__bam_peak_6891	268	.	2.58376	29.0402	26.8867	419	Promoter (<=1kb)	4	5669713	5679930	10218	1	NM_141316	0	Atg17	Atg17
chr3L	8186659	8187274	Filter_SAM_or_BAM__output_SAM_or_BAM_on_data_207__bam_peak_5153	167	.	2.94788	18.6878	16.7609	555	Promoter (<=1kb)	3	8186857	8190714	3858	1	NM_001300048	0	Atg18a	Atg18a
chr2L	21219661	21219982	Filter_SAM_or_BAM__output_SAM_or_BAM_on_data_207__bam_peak_2009	282	.	2.76986	30.4794	28.2967	89	Promoter (<=1kb)	1	21212322	21220572	8251	2	NM_001273738	590	Atg18b	Atg18b
chr3L	2774296	2774544	Filter_SAM_or_BAM__output_SAM_or_BAM_on_data_207__bam_peak_4657	56	.	2.32032	7.30389	5.69788	176	Promoter (<=1kb)	3	2774338	2780677	6340	1	NM_001274412	0	Atg2	Atg2
chr3L	18748564	18748815	Filter_SAM_or_BAM__output_SAM_or_BAM_on_data_207__bam_peak_6237	118	.	2.32078	13.6001	11.8012	174	Promoter (<=1kb)	3	18748687	18750483	1797	1	NM_140802	0	Atg3	Atg3
chrX	7323693	7323924	Filter_SAM_or_BAM__output_SAM_or_BAM_on_data_207__bam_peak_10263	70	.	2.39293	8.75086	7.09419	65	Promoter (<=1kb)	6	7314622	7323770	9149	2	NM_132162	0	Atg5	Atg5
chr3R	24050694	24050901	Filter_SAM_or_BAM__output_SAM_or_BAM_on_data_207__bam_peak_8751	202	.	3.00379	22.2475	20.2387	162	Promoter (<=1kb)	4	24049180	24050782	1603	2	NM_142952	0	Atg6	Atg6
chrX	10768017	10768731	Filter_SAM_or_BAM__output_SAM_or_BAM_on_data_207__bam_peak_10572	615	.	5.78153	64.3691	61.5067	1492	Promoter (<=1kb)	6	10764878	10768338	3461	2	NM_167245	0	Atg8a	Atg8a
chr2R	16294095	16294473	Filter_SAM_or_BAM__output_SAM_or_BAM_on_data_207__bam_peak_3393	234	.	4.04349	25.5578	23.4769	380	Promoter (<=1kb)	2	16294400	16297232	2833	1	NM_001274094	0	Atg9	Atg9
chr3R	4775437	4775696	Filter_SAM_or_BAM__output_SAM_or_BAM_on_data_207__bam_peak_6786	140	.	2.32262	15.9093	14.0506	95	Promoter (<=1kb)	4	4775605	4777490	1886	1	NM_141236	0	atms	atms
chr3L	21640783	21641119	Filter_SAM_or_BAM__output_SAM_or_BAM_on_data_207__bam_peak_6582	260	.	3.71242	28.2226	26.0859	190	Promoter (<=1kb)	3	21640995	21642599	1605	1	NM_001275255	0	Atox1	Atox1
chr3R	9260449	9260747	Filter_SAM_or_BAM__output_SAM_or_BAM_on_data_207__bam_peak_7214	224	.	2.62944	24.4627	22.4053	148	Promoter (<=1kb)	4	9260638	9262590	1953	1	NM_141619	0	ATP6AP2	ATP6AP2
chrX	11854768	11855122	Filter_SAM_or_BAM__output_SAM_or_BAM_on_data_207__bam_peak_10674	122	.	3.34323	14.0594	12.2486	154	Promoter (<=1kb)	6	11855022	11863827	8806	1	NM_132528	0	ATP7	ATP7
chr3R	12080585	12080925	Filter_SAM_or_BAM__output_SAM_or_BAM_on_data_207__bam_peak_7509	165	.	3.09742	18.4815	16.5592	176	Promoter (<=1kb)	4	12068375	12079928	11554	2	NM_169450	-658	ATP8B	ATP8B
chr3R	20947980	20948943	Filter_SAM_or_BAM__output_SAM_or_BAM_on_data_207__bam_peak_8358	936	.	5.24091	97.2131	93.6014	268	Promoter (<=1kb)	4	20948714	20976239	27526	1	NM_001275861	0	Atpalpha	Atpalpha
chr3R	20949744	20950139	Filter_SAM_or_BAM__output_SAM_or_BAM_on_data_207__bam_peak_8359	318	.	3.7856	34.0963	31.8403	176	Promoter (<=1kb)	4	20948780	20975284	26505	1	NM_206527	965	Atpalpha	Atpalpha
chr3R	20956712	20957244	Filter_SAM_or_BAM__output_SAM_or_BAM_on_data_207__bam_peak_8361	246	.	3.75047	26.7703	24.6639	398	Promoter (<=1kb)	4	20957734	20974337	16604	1	NM_169937	-490	Atpalpha	Atpalpha
chr3R	20957534	20958065	Filter_SAM_or_BAM__output_SAM_or_BAM_on_data_207__bam_peak_8362	210	.	3.493	23.1083	21.0807	112	Promoter (<=1kb)	4	20957734	20974337	16604	1	NM_169937	0	Atpalpha	Atpalpha
chr2R	16000290	16000524	Filter_SAM_or_BAM__output_SAM_or_BAM_on_data_207__bam_peak_3346	84	.	2.24726	10.1777	8.47671	113	Promoter (<=1kb)	2	15993803	16000287	6485	2	NM_166131	-4	ATPCL	ATPCL
chr2R	16001008	16001485	Filter_SAM_or_BAM__output_SAM_or_BAM_on_data_207__bam_peak_3347	174	.	2.83536	19.3572	17.4144	167	Promoter (<=1kb)	2	15993531	16001290	7760	2	NM_001144202	0	ATPCL	ATPCL
chr4	1031653	1032057	Filter_SAM_or_BAM__output_SAM_or_BAM_on_data_207__bam_peak_9570	274	.	2.75163	29.6623	27.4961	198	Promoter (<=1kb)	5	1031864	1034557	2694	1	NM_166808	0	ATPsynbeta	ATPsynbeta
chr3R	31218485	31218964	Filter_SAM_or_BAM__output_SAM_or_BAM_on_data_207__bam_peak_9423	527	.	4.1583	55.4156	52.7379	201	Promoter (<=1kb)	4	31216145	31218904	2760	2	NM_001260454	0	ATPsynC	ATPsynC
chr3R	31219355	31219971	Filter_SAM_or_BAM__output_SAM_or_BAM_on_data_207__bam_peak_9424	435	.	4.37517	46.0031	43.5099	314	Promoter (<=1kb)	4	31216145	31219559	3415	2	NM_001260453	0	ATPsynC	ATPsynC
chr3R	23355912	23356156	Filter_SAM_or_BAM__output_SAM_or_BAM_on_data_207__bam_peak_8672	181	.	2.57626	20.0986	18.1382	151	Promoter (<=1kb)	4	23355220	23356064	845	2	NM_001275944	0	ATPsynCF6	ATPsynCF6
chr3R	19094854	19095072	Filter_SAM_or_BAM__output_SAM_or_BAM_on_data_207__bam_peak_8200	193	.	3.67384	21.3404	19.3519	134	Promoter (<=1kb)	4	19095000	19096055	1056	1	NM_079678	0	ATPsynD	ATPsynD
chr3R	14326940	14327188	Filter_SAM_or_BAM__output_SAM_or_BAM_on_data_207__bam_peak_7714	137	.	2.77854	15.566	13.7157	153	Promoter (<=1kb)	4	14326947	14327735	789	1	NM_001202292	0	ATPsynE	ATPsynE
chr2R	24599700	24600036	Filter_SAM_or_BAM__output_SAM_or_BAM_on_data_207__bam_peak_4246	621	.	4.0778	64.9842	62.1094	142	Promoter (<=1kb)	2	24599088	24599797	710	2	NM_166678	0	ATPsynF	ATPsynF
chr2L	10976246	10976525	Filter_SAM_or_BAM__output_SAM_or_BAM_on_data_207__bam_peak_1173	142	.	2.27813	16.1272	14.2625	161	Promoter (<=1kb)	1	10975522	10976399	878	2	NM_001042889	0	ATPsynG	ATPsynG
chr3R	29748722	29749322	Filter_SAM_or_BAM__output_SAM_or_BAM_on_data_207__bam_peak_9257	153	.	2.52965	17.1961	15.3049	409	Promoter (<=1kb)	4	29747704	29748869	1166	2	NM_170426	0	ATPsyngamma	ATPsyngamma
chr3R	15265437	15265754	Filter_SAM_or_BAM__output_SAM_or_BAM_on_data_207__bam_peak_7822	289	.	3.63046	31.167	28.9704	132	Promoter (<=1kb)	4	15265591	15266690	1100	1	NM_079634	0	ATPsynO	ATPsynO
chr3R	15409757	15410087	Filter_SAM_or_BAM__output_SAM_or_BAM_on_data_207__bam_peak_7846	165	.	3.19064	18.4265	16.5061	152	Promoter (<=1kb)	4	15409451	15417277	7827	1	NM_169658	307	Atx2	Atx2
chr2L	2375708	2375963	Filter_SAM_or_BAM__output_SAM_or_BAM_on_data_207__bam_peak_269	178	.	2.86343	19.8286	17.8749	93	Promoter (<=1kb)	1	2375841	2380268	4428	1	NM_001273004	0	Atxn7	Atxn7
chr2L	11001330	11001572	Filter_SAM_or_BAM__output_SAM_or_BAM_on_data_207__bam_peak_1176	130	.	2.04225	14.8452	13.0135	113	Promoter (<=1kb)	1	10997819	11001476	3658	2	NM_057386	0	aub	aub
chr2L	10858095	10858326	Filter_SAM_or_BAM__output_SAM_or_BAM_on_data_207__bam_peak_1166	92	.	2.32246	10.9616	9.23751	70	Promoter (<=1kb)	1	10856797	10858094	1298	2	NM_057988	-2	aurB	aurB
chr3R	31745768	31746093	Filter_SAM_or_BAM__output_SAM_or_BAM_on_data_207__bam_peak_9473	349	.	4.536	37.2499	34.9307	150	Promoter (<=1kb)	4	31745172	31745928	757	2	NM_001300695	0	awd	awd
chr3R	30022628	30022869	Filter_SAM_or_BAM__output_SAM_or_BAM_on_data_207__bam_peak_9298	110	.	3.1979	12.8422	11.0643	137	Promoter (<=1kb)	4	30022842	30034919	12078	1	NM_170459	0	Axn	Axn
chrX	16683750	16683795	Filter_SAM_or_BAM__output_SAM_or_BAM_on_data_207__bam_peak_11109	100	.	3.2956	11.8341	10.0839	126	Promoter (<=1kb)	6	16680089	16683895	3807	2	NM_057429	100	Axs	Axs
chr2L	2364698	2365457	Filter_SAM_or_BAM__output_SAM_or_BAM_on_data_207__bam_peak_265	334	.	3.01519	35.703	33.4148	627	Promoter (<=1kb)	1	2365345	2370137	4793	1	NM_001272999	0	Axud1	Axud1
chr2L	13549019	13549377	Filter_SAM_or_BAM__output_SAM_or_BAM_on_data_207__bam_peak_1390	129	.	3.02626	14.8008	12.9703	128	Promoter (<=1kb)	1	13500624	13549328	48705	2	NM_001273516	0	B4	B4
chr3R	13661148	13661541	Filter_SAM_or_BAM__output_SAM_or_BAM_on_data_207__bam_peak_7645	272	.	3.86712	29.3626	27.2022	175	Promoter (<=1kb)	4	13661311	13666891	5581	1	NM_001014619	0	B52	B52
chr3L	1177009	1177472	Filter_SAM_or_BAM__output_SAM_or_BAM_on_data_207__bam_peak_4480	428	.	4.34414	45.3475	42.8674	293	Promoter (<=1kb)	3	1140429	1177276	36848	2	NM_001274313	0	bab2	bab2
chr3L	1178000	1178663	Filter_SAM_or_BAM__output_SAM_or_BAM_on_data_207__bam_peak_4481	420	.	6.37987	44.541	42.0772	217	Promoter (<=1kb)	3	1140429	1177276	36848	2	NM_079155	-725	bab2	bab2
chr2R	8952183	8952431	Filter_SAM_or_BAM__output_SAM_or_BAM_on_data_207__bam_peak_2490	161	.	3.22882	18.0925	16.1792	76	Promoter (<=1kb)	2	8952339	8962796	10458	1	NM_001169621	0	babo	babo
chr2L	2752927	2753397	Filter_SAM_or_BAM__output_SAM_or_BAM_on_data_207__bam_peak_286	558	.	4.51098	58.6277	55.8854	181	Promoter (<=1kb)	1	2753233	2756663	3431	1	NM_164498	0	Bacc	Bacc
chr2L	8029219	8029496	Filter_SAM_or_BAM__output_SAM_or_BAM_on_data_207__bam_peak_835	117	.	2.43379	13.5362	11.7398	107	Promoter (<=1kb)	1	8029462	8030150	689	1	NM_135332	0	baf	baf
chr3L	16661198	16662230	Filter_SAM_or_BAM__output_SAM_or_BAM_on_data_207__bam_peak_5995	424	.	3.79482	44.8831	42.412	431	Promoter (<=1kb)	3	16648442	16661615	13174	2	NM_140652	0	Baldspot	Baldspot
chr3R	25245469	25245757	Filter_SAM_or_BAM__output_SAM_or_BAM_on_data_207__bam_peak_8873	217	.	2.77765	23.7684	21.7263	143	Promoter (<=1kb)	4	25243039	25245109	2071	2	NM_057452	-361	bam	bam
chr3L	641575	641791	Filter_SAM_or_BAM__output_SAM_or_BAM_on_data_207__bam_peak_4416	154	.	2.18831	17.3959	15.4995	174	Promoter (<=1kb)	3	642208	642288	81	1	NR_048212	-417	ban	ban
chr2R	6636307	6636657	Filter_SAM_or_BAM__output_SAM_or_BAM_on_data_207__bam_peak_2211	102	.	2.72365	11.9913	10.2368	187	Promoter (<=1kb)	2	6636512	6642358	5847	1	NM_136372	0	Bap170	Bap170
chr2R	17430915	17431201	Filter_SAM_or_BAM__output_SAM_or_BAM_on_data_207__bam_peak_3521	274	.	2.75163	29.6623	27.4961	138	Promoter (<=1kb)	2	17429353	17430963	1611	2	NM_137365	0	Bap55	Bap55
chrX	13159376	13159821	Filter_SAM_or_BAM__output_SAM_or_BAM_on_data_207__bam_peak_10781	222	.	3.57721	24.2959	22.2421	167	Promoter (<=1kb)	6	13157445	13159508	2064	2	NM_078588	0	Bap60	Bap60
chr3L	21433047	21433286	Filter_SAM_or_BAM__output_SAM_or_BAM_on_data_207__bam_peak_6558	70	.	1.93735	8.75076	7.09419	113	Promoter (<=1kb)	3	21420388	21433134	12747	2	NM_141056	0	barc	barc
chr2L	3786183	3786691	Filter_SAM_or_BAM__output_SAM_or_BAM_on_data_207__bam_peak_420	639	.	4.4317	66.8761	63.9601	167	Promoter (<=1kb)	1	3787167	3802726	15560	1	NM_001258935	-476	bark	bark
chrX	17159784	17160236	Filter_SAM_or_BAM__output_SAM_or_BAM_on_data_207__bam_peak_11159	224	.	3.44531	24.5536	22.4941	149	Promoter (<=1kb)	6	17160006	17195313	35308	1	NM_001042818	0	baz	baz
chrX	17160401	17160547	Filter_SAM_or_BAM__output_SAM_or_BAM_on_data_207__bam_peak_11160	50	.	2.33705	6.65601	5.07462	80	Promoter (<=1kb)	6	17160006	17200728	40723	1	NM_001347807	396	baz	baz
chr2R	13494711	13495055	Filter_SAM_or_BAM__output_SAM_or_BAM_on_data_207__bam_peak_3071	187	.	2.39947	20.772	18.7967	191	Promoter (<=1kb)	2	13486634	13494862	8229	2	NM_001259371	0	bbc	bbc
chr3L	14427125	14427746	Filter_SAM_or_BAM__output_SAM_or_BAM_on_data_207__bam_peak_5753	530	.	4.77114	55.7197	53.0363	454	Promoter (<=1kb)	3	14412828	14427378	14551	2	NM_001144478	0	bbg	bbg
chr3L	14476560	14477229	Filter_SAM_or_BAM__output_SAM_or_BAM_on_data_207__bam_peak_5757	329	.	3.91971	35.256	32.9769	551	Promoter (<=1kb)	3	14412991	14476688	63698	2	NM_001144477	0	bbg	bbg
chrX	21362858	21363180	Filter_SAM_or_BAM__output_SAM_or_BAM_on_data_207__bam_peak_11462	151	.	2.67214	16.9866	15.1004	186	Promoter (<=1kb)	6	21363028	21373145	10118	1	NM_001031917	0	bbx	bbx
chr3L	5565047	5565268	Filter_SAM_or_BAM__output_SAM_or_BAM_on_data_207__bam_peak_4932	136	.	2.81435	15.5347	13.6852	134	Promoter (<=1kb)	3	5565231	5566765	1535	1	NM_139715	0	bc10	bc10
chr3R	6759468	6759876	Filter_SAM_or_BAM__output_SAM_or_BAM_on_data_207__bam_peak_6969	756	.	6.21576	78.8496	75.6704	215	Promoter (<=1kb)	4	6755842	6759466	3625	2	NM_176411	-3	bcd	bcd
chr2L	5906835	5907269	Filter_SAM_or_BAM__output_SAM_or_BAM_on_data_207__bam_peak_591	155	.	1.88514	17.4973	15.5986	195	Promoter (<=1kb)	1	5907169	5922776	15608	1	NM_135124	0	bchs	bchs
chrX	9355880	9356723	Filter_SAM_or_BAM__output_SAM_or_BAM_on_data_207__bam_peak_10474	207	.	3.84847	22.8182	20.7967	414	Promoter (<=1kb)	6	9356634	9358594	1961	1	NM_132334	0	BCL7-like	BCL7-like
chrX	2149555	2149833	Filter_SAM_or_BAM__output_SAM_or_BAM_on_data_207__bam_peak_9782	317	.	4.01361	34	31.7463	142	Promoter (<=1kb)	6	2148463	2149647	1185	2	NM_057711	0	bcn92	bcn92
chr2R	15928289	15928608	Filter_SAM_or_BAM__output_SAM_or_BAM_on_data_207__bam_peak_3338	146	.	2.11677	16.4869	14.6134	187	Promoter (<=1kb)	2	15923040	15928330	5291	2	NM_166121	0	bdg	bdg
chr2R	15931000	15931592	Filter_SAM_or_BAM__output_SAM_or_BAM_on_data_207__bam_peak_3340	200	.	2.3842	22.0409	20.0365	178	Promoter (<=1kb)	2	15923040	15931935	8896	2	NM_001299540	343	bdg	bdg
chr2R	15931711	15932275	Filter_SAM_or_BAM__output_SAM_or_BAM_on_data_207__bam_peak_3341	579	.	3.70379	60.7566	57.971	220	Promoter (<=1kb)	2	15923040	15931935	8896	2	NM_001299540	0	bdg	bdg
chrX	15023687	15024072	Filter_SAM_or_BAM__output_SAM_or_BAM_on_data_207__bam_peak_10932	393	.	3.48311	41.7339	39.3258	194	Promoter (<=1kb)	6	15024436	15034414	9979	1	NM_001258745	-364	be	be
chrX	15024380	15024637	Filter_SAM_or_BAM__output_SAM_or_BAM_on_data_207__bam_peak_10933	698	.	7.74901	72.9129	69.8672	186	Promoter (<=1kb)	6	15024436	15034414	9979	1	NM_001258745	0	be	be
chr2R	14771236	14771446	Filter_SAM_or_BAM__output_SAM_or_BAM_on_data_207__bam_peak_3229	107	.	2.44156	12.5465	10.7767	142	Promoter (<=1kb)	2	14771301	14772630	1330	1	NM_166069	0	BEAF-32	BEAF-32
chr3L	17035479	17035752	Filter_SAM_or_BAM__output_SAM_or_BAM_on_data_207__bam_peak_6063	284	.	3.858	30.6131	28.4272	144	Promoter (<=1kb)	3	17035668	17036865	1198	1	NM_140693	0	beg	beg
chr3R	8659378	8659934	Filter_SAM_or_BAM__output_SAM_or_BAM_on_data_207__bam_peak_7136	885	.	4.71815	91.994	88.5052	178	Promoter (<=1kb)	4	8655587	8660422	4836	2	NM_080522	488	bel	bel
chr3R	8660191	8660439	Filter_SAM_or_BAM__output_SAM_or_BAM_on_data_207__bam_peak_7137	99	.	2.13206	11.6612	9.91636	154	Promoter (<=1kb)	4	8655587	8660422	4836	2	NM_080522	0	bel	bel
chr3R	10170152	10170935	Filter_SAM_or_BAM__output_SAM_or_BAM_on_data_207__bam_peak_7347	1370	.	6.20255	141.775	137.046	358	Promoter (<=1kb)	4	10161464	10170487	9024	2	NM_001144561	0	Best1	Best1
chr3L	6257268	6257517	Filter_SAM_or_BAM__output_SAM_or_BAM_on_data_207__bam_peak_4992	285	.	3.41791	30.6914	28.5042	70	Promoter (<=1kb)	3	6245933	6256665	10733	2	NM_168162	-604	Best2	Best2
chr3L	19261305	19261535	Filter_SAM_or_BAM__output_SAM_or_BAM_on_data_207__bam_peak_6321	65	.	1.86337	8.23202	6.59287	166	Promoter (<=1kb)	3	19261394	19262154	761	1	NM_140839	0	Bet1	Bet1
chr3L	9442096	9442381	Filter_SAM_or_BAM__output_SAM_or_BAM_on_data_207__bam_peak_5300	168	.	2.78233	18.796	16.8665	145	Promoter (<=1kb)	3	9438482	9442267	3786	2	NM_140055	0	Bet3	Bet3
chr3R	4197006	4197499	Filter_SAM_or_BAM__output_SAM_or_BAM_on_data_207__bam_peak_6728	303	.	2.88043	32.6032	30.3772	314	Promoter (<=1kb)	4	4197206	4204572	7367	1	NM_001259970	0	beta-Man	beta-Man
chr3R	24252539	24252820	Filter_SAM_or_BAM__output_SAM_or_BAM_on_data_207__bam_peak_8780	276	.	3.48529	29.8388	27.6688	156	Promoter (<=1kb)	4	24250460	24252679	2220	2	NM_142980	0	beta-PheRS	beta-PheRS
chr2L	13378732	13378995	Filter_SAM_or_BAM__output_SAM_or_BAM_on_data_207__bam_peak_1372	65	.	2.25901	8.21963	6.58087	118	Promoter (<=1kb)	1	13378902	13382382	3481	1	NM_080097	0	beta'COP	beta'COP
chr2L	2878969	2879167	Filter_SAM_or_BAM__output_SAM_or_BAM_on_data_207__bam_peak_308	86	.	2.66219	10.3094	8.60485	106	Promoter (<=1kb)	1	2879112	2880708	1597	1	NM_080155	0	betaggt-II	betaggt-II
chr2R	19449674	19450151	Filter_SAM_or_BAM__output_SAM_or_BAM_on_data_207__bam_peak_3769	251	.	3.1823	27.2523	25.1354	305	Promoter (<=1kb)	2	19447319	19449599	2281	2	NM_166356	-76	betaTub56D	betaTub56D
chr2R	19450522	19451765	Filter_SAM_or_BAM__output_SAM_or_BAM_on_data_207__bam_peak_3770	718	.	5.45764	74.9092	71.8199	408	Promoter (<=1kb)	2	19447319	19451600	4282	2	NM_079071	0	betaTub56D	betaTub56D
chr3L	7238340	7238648	Filter_SAM_or_BAM__output_SAM_or_BAM_on_data_207__bam_peak_5040	534	.	4.48773	56.1005	53.409	164	Promoter (<=1kb)	3	7238542	7240245	1704	1	NM_139833	0	BHD	BHD
chrX	4426686	4427129	Filter_SAM_or_BAM__output_SAM_or_BAM_on_data_207__bam_peak_9997	550	.	7.68974	57.7387	55.0146	270	Promoter (<=1kb)	6	4427135	4484452	57318	1	NM_001169192	-6	bi	bi
chr3L	8308894	8309261	Filter_SAM_or_BAM__output_SAM_or_BAM_on_data_207__bam_peak_5164	55	.	1.91461	7.1208	5.52117	33	Promoter (<=1kb)	3	8307145	8308941	1797	2	NM_139948	0	BI-1	BI-1
chr2R	12870118	12870340	Filter_SAM_or_BAM__output_SAM_or_BAM_on_data_207__bam_peak_2994	76	.	2.00072	9.3527	7.67741	134	Promoter (<=1kb)	2	12870249	12871240	992	1	NM_165954	0	bic	bic
chr2L	17473031	17473439	Filter_SAM_or_BAM__output_SAM_or_BAM_on_data_207__bam_peak_1692	226	.	3.00253	24.6975	22.635	286	Promoter (<=1kb)	1	17459605	17473215	13611	2	NM_001273601	0	BicD	BicD
chr3R	16186775	16187236	Filter_SAM_or_BAM__output_SAM_or_BAM_on_data_207__bam_peak_7916	685	.	6.04556	71.5454	68.5284	172	Promoter (<=1kb)	4	16186156	16186897	742	2	NM_079653	0	Bin1	Bin1
chr2R	6220278	6220605	Filter_SAM_or_BAM__output_SAM_or_BAM_on_data_207__bam_peak_2183	456	.	3.24612	48.1541	45.6178	204	Promoter (<=1kb)	2	6221040	6240602	19563	1	NM_001316407	-435	bin3	bin3
chr2R	6220944	6221418	Filter_SAM_or_BAM__output_SAM_or_BAM_on_data_207__bam_peak_2184	715	.	4.19061	74.6184	71.5353	614	Promoter (<=1kb)	2	6221040	6240602	19563	1	NM_001316407	0	bin3	bin3
chr3L	8056418	8056749	Filter_SAM_or_BAM__output_SAM_or_BAM_on_data_207__bam_peak_5131	624	.	5.67781	65.3279	62.445	188	Promoter (<=1kb)	3	8054333	8056375	2043	2	NM_001169904	-44	bip1	bip1
chr3L	8058796	8059043	Filter_SAM_or_BAM__output_SAM_or_BAM_on_data_207__bam_peak_5132	110	.	2.44188	12.8166	11.0393	78	Promoter (<=1kb)	3	8054333	8058713	4381	2	NM_139912	-84	bip1	bip1
chr3R	11741747	11741954	Filter_SAM_or_BAM__output_SAM_or_BAM_on_data_207__bam_peak_7478	113	.	2.49148	13.1418	11.3556	146	Promoter (<=1kb)	4	11736810	11741783	4974	2	NM_079595	0	Blm	Blm
chr3L	10878937	10879171	Filter_SAM_or_BAM__output_SAM_or_BAM_on_data_207__bam_peak_5453	249	.	3.46619	27.0712	24.958	125	Promoter (<=1kb)	3	10879085	10879797	713	1	NM_001274760	0	Blos4	Blos4
chr3L	17407139	17407380	Filter_SAM_or_BAM__output_SAM_or_BAM_on_data_207__bam_peak_6068	339	.	5.11925	36.2441	33.945	171	Promoter (<=1kb)	3	17396031	17406521	10491	2	NM_170637	-619	blot	blot
chr3L	17421291	17421756	Filter_SAM_or_BAM__output_SAM_or_BAM_on_data_207__bam_peak_6070	211	.	2.73824	23.2293	21.1989	150	Promoter (<=1kb)	3	17396031	17421514	25484	2	NM_170636	0	blot	blot
chr2R	7587079	7587384	Filter_SAM_or_BAM__output_SAM_or_BAM_on_data_207__bam_peak_2318	534	.	7.08797	56.1534	53.4613	160	Promoter (<=1kb)	2	7580488	7587079	6592	2	NM_165542	-1	blow	blow
chr2R	22798484	22798980	Filter_SAM_or_BAM__output_SAM_or_BAM_on_data_207__bam_peak_4065	342	.	3.03124	36.5594	34.254	164	Promoter (<=1kb)	2	22799099	22802180	3082	1	NM_166554	-119	blw	blw
chr2R	22799543	22799887	Filter_SAM_or_BAM__output_SAM_or_BAM_on_data_207__bam_peak_4066	177	.	2.83743	19.7261	17.7748	159	Promoter (<=1kb)	2	22799099	22802180	3082	1	NM_166554	445	blw	blw
chr3L	14786128	14786543	Filter_SAM_or_BAM__output_SAM_or_BAM_on_data_207__bam_peak_5790	284	.	2.91051	30.6084	28.4226	189	Promoter (<=1kb)	3	14776496	14786412	9917	2	NM_001169974	0	bmm	bmm
chr3R	19836582	19837238	Filter_SAM_or_BAM__output_SAM_or_BAM_on_data_207__bam_peak_8259	183	.	3.15109	20.3586	18.3929	303	Promoter (<=1kb)	4	19794075	19836817	42743	2	NM_001300482	0	bnl	bnl
chr3R	27938323	27938649	Filter_SAM_or_BAM__output_SAM_or_BAM_on_data_207__bam_peak_9108	57	.	2.08673	7.40402	5.79421	157	Promoter (<=1kb)	4	27938562	27942778	4217	1	NM_001170280	0	BOD1	BOD1
chrX	2447713	2448150	Filter_SAM_or_BAM__output_SAM_or_BAM_on_data_207__bam_peak_9822	110	.	3.12274	12.8405	11.0626	173	Promoter (<=1kb)	6	2444167	2447892	3726	2	NM_166941	0	boi	boi
chr3L	9125087	9125320	Filter_SAM_or_BAM__output_SAM_or_BAM_on_data_207__bam_peak_5266	131	.	3.2076	14.9952	13.1599	64	Promoter (<=1kb)	3	9101641	9125313	23673	2	NM_168318	0	bol	bol
chr3L	9125393	9125617	Filter_SAM_or_BAM__output_SAM_or_BAM_on_data_207__bam_peak_5267	147	.	3.11936	16.6527	14.7744	190	Promoter (<=1kb)	3	9106548	9125313	18766	2	NM_168319	-81	bol	bol
chr2L	9253082	9253312	Filter_SAM_or_BAM__output_SAM_or_BAM_on_data_207__bam_peak_990	86	.	2.16653	10.3986	8.69032	55	Promoter (<=1kb)	1	9251472	9253118	1647	2	NM_135435	0	borr	borr
chr2L	3771057	3771686	Filter_SAM_or_BAM__output_SAM_or_BAM_on_data_207__bam_peak_414	848	.	5.87829	88.2642	84.864	923	Promoter (<=1kb)	1	3771700	3784121	12422	1	NM_001258932	-14	bowl	bowl
chr2L	3771946	3772198	Filter_SAM_or_BAM__output_SAM_or_BAM_on_data_207__bam_peak_414	848	.	5.87829	88.2642	84.864	923	Promoter (<=1kb)	1	3772026	3784121	12096	1	NM_164558	0	bowl	bowl
chr2L	3772952	3773002	Filter_SAM_or_BAM__output_SAM_or_BAM_on_data_207__bam_peak_415	308	.	3.71235	33.0474	30.813	157	Promoter (<=1kb)	1	3772026	3784121	12096	1	NM_164558	927	bowl	bowl
chr2L	3778340	3779049	Filter_SAM_or_BAM__output_SAM_or_BAM_on_data_207__bam_peak_417	1006	.	5.37315	104.421	100.632	1270	Promoter (<=1kb)	1	3778938	3784121	5184	1	NM_164556	0	bowl	bowl
chr2L	19133389	19134062	Filter_SAM_or_BAM__output_SAM_or_BAM_on_data_207__bam_peak_1806	58	.	1.79794	7.43185	5.82073	351	Promoter (<=1kb)	1	19133816	19171852	38037	1	NM_057597	0	brat	brat
chr2L	19166013	19166399	Filter_SAM_or_BAM__output_SAM_or_BAM_on_data_207__bam_peak_1820	885	.	4.67049	92.0282	88.5383	178	Promoter (<=1kb)	1	19165867	19172567	6701	1	NM_001299154	147	brat	brat
chr2L	19157843	19158645	Filter_SAM_or_BAM__output_SAM_or_BAM_on_data_207__bam_peak_1813	639	.	4.08618	66.8414	63.9266	839	Promoter (<=1kb)	1	19158540	19172567	14028	1	NM_134302	0	brat	brat
chr2R	24525985	24526309	Filter_SAM_or_BAM__output_SAM_or_BAM_on_data_207__bam_peak_4232	473	.	4.64435	49.9582	47.3867	183	Promoter (<=1kb)	2	24526172	24529581	3410	1	NM_138081	0	Brca2	Brca2
chr3R	29223338	29223547	Filter_SAM_or_BAM__output_SAM_or_BAM_on_data_207__bam_peak_9214	108	.	2.46154	12.594	10.8229	83	Promoter (<=1kb)	4	29223485	29226276	2792	1	NM_143428	0	Brd8	Brd8
chr3L	5794106	5794363	Filter_SAM_or_BAM__output_SAM_or_BAM_on_data_207__bam_peak_4953	221	.	3.18594	24.1919	22.1403	80	Promoter (<=1kb)	3	5789831	5794192	4362	2	NM_001300021	0	Bre1	Bre1
chr3R	17391279	17391593	Filter_SAM_or_BAM__output_SAM_or_BAM_on_data_207__bam_peak_8030	98	.	2.4403	11.6007	9.85809	171	Promoter (<=1kb)	4	17374833	17391337	16505	2	NM_142359	0	Brf	Brf
chrX	7307477	7308159	Filter_SAM_or_BAM__output_SAM_or_BAM_on_data_207__bam_peak_10262	353	.	6.00532	37.7169	35.3892	195	Promoter (<=1kb)	6	7307939	7311132	3194	1	NM_078514	0	brk	brk
chr2L	12365885	12366324	Filter_SAM_or_BAM__output_SAM_or_BAM_on_data_207__bam_peak_1262	706	.	4.82721	73.7365	70.6728	334	Promoter (<=1kb)	1	12366366	12397528	31163	1	NM_001259070	-42	bru2	bru2
chr3R	24318864	24319080	Filter_SAM_or_BAM__output_SAM_or_BAM_on_data_207__bam_peak_8794	73	.	2.06576	9.02554	7.36121	122	Promoter (<=1kb)	4	24319000	24328619	9620	1	NM_170139	0	BRWD3	BRWD3
chr2L	9568756	9568902	Filter_SAM_or_BAM__output_SAM_or_BAM_on_data_207__bam_peak_1019	560	.	5.00816	58.814	56.0674	175	Promoter (<=1kb)	1	9568890	9573572	4683	1	NM_164859	0	brwl	brwl
chr2L	9569154	9569155	Filter_SAM_or_BAM__output_SAM_or_BAM_on_data_207__bam_peak_1020	413	.	3.18337	43.7657	41.3166	175	Promoter (<=1kb)	1	9568890	9573572	4683	1	NM_164859	265	brwl	brwl
chr2L	9569838	9569995	Filter_SAM_or_BAM__output_SAM_or_BAM_on_data_207__bam_peak_1020	413	.	3.18337	43.7657	41.3166	175	Promoter (<=1kb)	1	9570271	9573572	3302	1	NM_135454	-276	brwl	brwl
chr2L	8083055	8083942	Filter_SAM_or_BAM__output_SAM_or_BAM_on_data_207__bam_peak_844	796	.	5.12891	82.9495	79.6779	694	Promoter (<=1kb)	1	8083420	8109458	26039	1	NM_164782	0	Bsg	Bsg
chr2L	8084373	8085244	Filter_SAM_or_BAM__output_SAM_or_BAM_on_data_207__bam_peak_845	787	.	4.01849	82.0134	78.763	496	Promoter (<=1kb)	1	8083420	8116531	33112	1	NM_164785	954	Bsg	Bsg
chr2L	8086664	8087329	Filter_SAM_or_BAM__output_SAM_or_BAM_on_data_207__bam_peak_846	615	.	3.67256	64.3683	61.5061	1229	Promoter (<=1kb)	1	8088304	8109458	21155	1	NM_164786	-975	Bsg	Bsg
chr2L	8088072	8088228	Filter_SAM_or_BAM__output_SAM_or_BAM_on_data_207__bam_peak_846	615	.	3.67256	64.3683	61.5061	1229	Promoter (<=1kb)	1	8088304	8109458	21155	1	NM_164786	-76	Bsg	Bsg
chr2L	5278402	5278741	Filter_SAM_or_BAM__output_SAM_or_BAM_on_data_207__bam_peak_547	171	.	2.65987	19.0385	17.1035	186	Promoter (<=1kb)	1	5271728	5278548	6821	2	NM_001201770	0	Bsg25D	Bsg25D
chr3L	3148133	3148779	Filter_SAM_or_BAM__output_SAM_or_BAM_on_data_207__bam_peak_4697	206	.	3.09661	22.6498	20.6318	225	Promoter (<=1kb)	3	3148646	3154225	5580	1	NM_001144408	0	BtbVII	BtbVII
chr3L	3149000	3149590	Filter_SAM_or_BAM__output_SAM_or_BAM_on_data_207__bam_peak_4698	436	.	4.18285	46.1402	43.6437	482	Promoter (<=1kb)	3	3149133	3154934	5802	1	NM_167990	0	BtbVII	BtbVII
chrX	13611992	13612212	Filter_SAM_or_BAM__output_SAM_or_BAM_on_data_207__bam_peak_10836	82	.	2.29999	9.93065	8.23735	76	Promoter (<=1kb)	6	13612131	13613228	1098	1	NM_132675	0	BthD	BthD
chr2L	8277574	8277811	Filter_SAM_or_BAM__output_SAM_or_BAM_on_data_207__bam_peak_869	596	.	4.79462	62.4201	59.6002	374	Promoter (<=1kb)	1	8258755	8277702	18948	2	NM_057398	0	Btk29A	Btk29A
chr2L	8300542	8300807	Filter_SAM_or_BAM__output_SAM_or_BAM_on_data_207__bam_peak_871	298	.	3.34377	32.0289	29.8151	122	Promoter (<=1kb)	1	8258373	8300746	42374	2	NM_001103651	0	Btk29A	Btk29A
chr2L	8300921	8301145	Filter_SAM_or_BAM__output_SAM_or_BAM_on_data_207__bam_peak_872	86	.	2.03257	10.3206	8.61545	166	Promoter (<=1kb)	1	8259505	8301079	41575	2	NM_164804	0	Btk29A	Btk29A
chr3R	22586506	22587012	Filter_SAM_or_BAM__output_SAM_or_BAM_on_data_207__bam_peak_8569	481	.	5.45694	50.7505	48.1635	459	Promoter (<=1kb)	4	22586149	22586625	477	2	NM_170026	0	btn	btn
chr2R	5974306	5974554	Filter_SAM_or_BAM__output_SAM_or_BAM_on_data_207__bam_peak_2149	280	.	3.10013	30.2386	28.061	126	Promoter (<=1kb)	2	5969099	5974385	5287	2	NM_058034	0	BubR1	BubR1
chr2L	16743398	16743694	Filter_SAM_or_BAM__output_SAM_or_BAM_on_data_207__bam_peak_1652	205	.	2.75082	22.579	20.5627	185	Promoter (<=1kb)	1	16743405	16745565	2161	1	NM_135964	0	BuGZ	BuGZ
chr2L	12461019	12461501	Filter_SAM_or_BAM__output_SAM_or_BAM_on_data_207__bam_peak_1277	428	.	3.47275	45.2939	42.815	592	Promoter (<=1kb)	1	12457138	12461256	4119	2	NM_165013	0	bun	bun
chr2L	12482886	12483404	Filter_SAM_or_BAM__output_SAM_or_BAM_on_data_207__bam_peak_1280	660	.	3.99598	69.0258	66.064	1514	Promoter (<=1kb)	1	12456577	12483589	27013	2	NM_001169494	185	bun	bun
chr2L	12484147	12484629	Filter_SAM_or_BAM__output_SAM_or_BAM_on_data_207__bam_peak_1280	660	.	3.99598	69.0258	66.064	1514	Promoter (<=1kb)	1	12456577	12483589	27013	2	NM_001169494	-559	bun	bun
chr2L	12493185	12493456	Filter_SAM_or_BAM__output_SAM_or_BAM_on_data_207__bam_peak_1281	95	.	2.07689	11.2998	9.56536	295	Promoter (<=1kb)	1	12456577	12493497	36921	2	NM_165012	41	bun	bun
chr2L	12546190	12546877	Filter_SAM_or_BAM__output_SAM_or_BAM_on_data_207__bam_peak_1301	537	.	5.66027	56.4266	53.7293	698	Promoter (<=1kb)	1	12455540	12546611	91072	2	NM_001042894	0	bun	bun
chr2L	12547077	12547319	Filter_SAM_or_BAM__output_SAM_or_BAM_on_data_207__bam_peak_1302	298	.	4.04128	32.0165	29.8028	112	Promoter (<=1kb)	1	12456887	12546611	89725	2	NM_080364	-467	bun	bun
chrX	18515178	18515481	Filter_SAM_or_BAM__output_SAM_or_BAM_on_data_207__bam_peak_11274	101	.	3.06976	11.9492	10.1961	147	Promoter (<=1kb)	6	18515428	18571726	56299	1	NM_001272759	0	Bx	Bx
chr3R	9532785	9533065	Filter_SAM_or_BAM__output_SAM_or_BAM_on_data_207__bam_peak_7260	686	.	4.87181	71.6691	68.6499	199	Promoter (<=1kb)	4	9528238	9533011	4774	2	NM_001170099	0	by	by
chrX	7901724	7902017	Filter_SAM_or_BAM__output_SAM_or_BAM_on_data_207__bam_peak_10316	52	.	2.15937	6.79742	5.20952	161	Promoter (<=1kb)	6	7901880	7903643	1764	1	NM_078519	0	bys	bys
chrX	9282998	9283294	Filter_SAM_or_BAM__output_SAM_or_BAM_on_data_207__bam_peak_10466	183	.	4.01636	20.3279	18.3627	158	Promoter (<=1kb)	6	9275318	9283117	7800	2	NM_001298121	0	c11.1	c11.1
chrX	9319151	9319377	Filter_SAM_or_BAM__output_SAM_or_BAM_on_data_207__bam_peak_10470	141	.	3.80825	15.9679	14.1073	137	Promoter (<=1kb)	6	9317915	9319223	1309	2	NM_144348	0	c12.1	c12.1
chr2L	8950003	8950345	Filter_SAM_or_BAM__output_SAM_or_BAM_on_data_207__bam_peak_955	891	.	4.29818	92.6796	89.1758	255	Promoter (<=1kb)	1	8943455	8951216	7762	2	NM_135414	871	C1GalTA	C1GalTA
chr2L	8951209	8951608	Filter_SAM_or_BAM__output_SAM_or_BAM_on_data_207__bam_peak_956	605	.	4.73975	63.3695	60.5287	151	Promoter (<=1kb)	1	8943455	8951216	7762	2	NM_135414	0	C1GalTA	C1GalTA
chrX	6803300	6803772	Filter_SAM_or_BAM__output_SAM_or_BAM_on_data_207__bam_peak_10213	210	.	3.38485	23.0941	21.0668	360	Promoter (<=1kb)	6	6780790	6803593	22804	2	NM_001298037	0	C3G	C3G
chr3R	29806644	29806857	Filter_SAM_or_BAM__output_SAM_or_BAM_on_data_207__bam_peak_9276	119	.	2.75676	13.7154	11.9135	180	Promoter (<=1kb)	4	29806811	29815047	8237	1	NM_170430	0	ca	ca
chr2L	11168690	11169107	Filter_SAM_or_BAM__output_SAM_or_BAM_on_data_207__bam_peak_1193	480	.	4.59237	50.6762	48.0904	153	Promoter (<=1kb)	1	11158378	11167896	9519	2	NM_205963	-795	Ca-beta	Ca-beta
chr2L	16356513	16357202	Filter_SAM_or_BAM__output_SAM_or_BAM_on_data_207__bam_peak_1592	354	.	2.85003	37.8107	35.4805	145	Promoter (<=1kb)	1	16354886	16356735	1850	2	NM_001299050	0	CaBP1	CaBP1
chr2L	16325387	16326222	Filter_SAM_or_BAM__output_SAM_or_BAM_on_data_207__bam_peak_1586	466	.	3.5118	49.2573	46.6996	629	Promoter (<=1kb)	1	16313036	16325625	12590	2	NM_057594	0	cact	cact
chr2L	20770393	20770764	Filter_SAM_or_BAM__output_SAM_or_BAM_on_data_207__bam_peak_1939	636	.	4.10034	66.5343	63.6267	213	Promoter (<=1kb)	1	20770731	20783135	12405	1	NM_001273712	0	cad	cad
chr3R	11948955	11949381	Filter_SAM_or_BAM__output_SAM_or_BAM_on_data_207__bam_peak_7498	454	.	3.88413	48.0198	45.4862	190	Promoter (<=1kb)	4	11893512	11949129	55618	2	NM_169440	0	Cad87A	Cad87A
chr4	1230546	1230911	Filter_SAM_or_BAM__output_SAM_or_BAM_on_data_207__bam_peak_9579	228	.	2.78462	24.8709	22.8047	267	Promoter (<=1kb)	5	1230837	1271759	40923	1	NM_001031858	0	Cadps	Cadps
chrX	8606231	8606488	Filter_SAM_or_BAM__output_SAM_or_BAM_on_data_207__bam_peak_10402	223	.	3.91554	24.3661	22.3107	158	Promoter (<=1kb)	6	8602137	8606304	4168	2	NM_132267	0	Caf1-180	Caf1-180
chrX	8681394	8681604	Filter_SAM_or_BAM__output_SAM_or_BAM_on_data_207__bam_peak_10406	89	.	2.68939	10.6362	8.92218	279	Promoter (<=1kb)	6	8681551	8688760	7210	1	NM_001272422	0	CAH3	CAH3
chrX	8681955	8682285	Filter_SAM_or_BAM__output_SAM_or_BAM_on_data_207__bam_peak_10407	386	.	5.27702	41.0178	38.6238	174	Promoter (<=1kb)	6	8681551	8688760	7210	1	NM_132269	405	CAH3	CAH3
chr3R	8980208	8980307	Filter_SAM_or_BAM__output_SAM_or_BAM_on_data_207__bam_peak_7166	463	.	2.84184	48.8837	46.3334	187	Promoter (<=1kb)	4	8980860	8982793	1934	1	NM_001300313	-553	CAHbeta	CAHbeta
chr2R	19424630	19425222	Filter_SAM_or_BAM__output_SAM_or_BAM_on_data_207__bam_peak_3763	414	.	3.65677	43.892	41.4409	414	Promoter (<=1kb)	2	19425113	19429050	3938	1	NM_057700	0	CalpA	CalpA
chr3L	9889002	9889039	Filter_SAM_or_BAM__output_SAM_or_BAM_on_data_207__bam_peak_5367	291	.	3.3576	31.3156	29.1159	145	Promoter (<=1kb)	3	9889104	9893011	3908	1	NM_001259777	-65	CalpB	CalpB
chr3R	9630646	9631164	Filter_SAM_or_BAM__output_SAM_or_BAM_on_data_207__bam_peak_7276	864	.	5.78701	89.8847	86.4459	282	Promoter (<=1kb)	4	9628691	9630851	2161	2	NM_001275501	0	Calr	Calr
chr2R	12258612	12258939	Filter_SAM_or_BAM__output_SAM_or_BAM_on_data_207__bam_peak_2917	36	.	1.67802	5.1313	3.61121	225	Promoter (<=1kb)	2	12259398	12274625	15228	1	NM_078986	-459	Cam	Cam
chr2R	12259110	12259612	Filter_SAM_or_BAM__output_SAM_or_BAM_on_data_207__bam_peak_2918	844	.	6.28449	87.829	84.4407	201	Promoter (<=1kb)	2	12259398	12274625	15228	1	NM_078986	0	Cam	Cam
chr4	1051274	1051617	Filter_SAM_or_BAM__output_SAM_or_BAM_on_data_207__bam_peak_9572	189	.	2.61748	20.953	18.9736	174	Promoter (<=1kb)	5	1035288	1051378	16091	2	NM_001169361	0	CaMKII	CaMKII
chr2R	17407127	17407433	Filter_SAM_or_BAM__output_SAM_or_BAM_on_data_207__bam_peak_3515	163	.	2.73125	18.2509	16.3338	206	Promoter (<=1kb)	2	17405304	17407150	1847	2	NM_001299594	0	Camp	Camp
chr2R	9445722	9446153	Filter_SAM_or_BAM__output_SAM_or_BAM_on_data_207__bam_peak_2560	251	.	3.16357	27.2333	25.1168	87	Promoter (<=1kb)	2	9446046	9478090	32045	1	NM_001144152	0	Camta	Camta
chr2L	11269472	11269842	Filter_SAM_or_BAM__output_SAM_or_BAM_on_data_207__bam_peak_1197	137	.	2.569	15.6122	13.7609	228	Promoter (<=1kb)	1	11269780	11277846	8067	1	NM_001032076	0	cana	cana
chrX	16586655	16586762	Filter_SAM_or_BAM__output_SAM_or_BAM_on_data_207__bam_peak_11095	129	.	3.66178	14.7436	12.9145	151	Promoter (<=1kb)	6	16560684	16586665	25982	2	NM_001258788	0	CanA-14F	CanA-14F
chrX	16586915	16587316	Filter_SAM_or_BAM__output_SAM_or_BAM_on_data_207__bam_peak_11096	198	.	4.46737	21.8655	19.8654	162	Promoter (<=1kb)	6	16565473	16587172	21700	2	NM_167523	0	CanA-14F	CanA-14F
chrX	5332302	5332616	Filter_SAM_or_BAM__output_SAM_or_BAM_on_data_207__bam_peak_10056	128	.	3.37072	14.6585	12.8318	220	Promoter (<=1kb)	6	5332499	5334449	1951	1	NM_001258602	0	CanB	CanB
chr2R	7785869	7786075	Filter_SAM_or_BAM__output_SAM_or_BAM_on_data_207__bam_peak_2363	38	.	1.74233	5.35786	3.82918	147	Promoter (<=1kb)	2	7786010	7788135	2126	1	NM_080135	0	CanB2	CanB2
chr2R	10270821	10272020	Filter_SAM_or_BAM__output_SAM_or_BAM_on_data_207__bam_peak_2673	852	.	7.18608	88.6722	85.2621	438	Promoter (<=1kb)	2	10271884	10306739	34856	1	NM_001259309	0	CAP	CAP
chr2R	10302551	10303173	Filter_SAM_or_BAM__output_SAM_or_BAM_on_data_207__bam_peak_2675	570	.	3.89899	59.8063	57.0401	446	Promoter (<=1kb)	2	10303001	10307024	4024	1	NM_165762	0	CAP	CAP
chr3R	29675445	29675645	Filter_SAM_or_BAM__output_SAM_or_BAM_on_data_207__bam_peak_9248	86	.	2.41468	10.3361	8.63007	68	Promoter (<=1kb)	4	29675651	29680257	4607	1	NM_143452	-6	Cap-D2	Cap-D2
chr3R	10761044	10761440	Filter_SAM_or_BAM__output_SAM_or_BAM_on_data_207__bam_peak_7390	141	.	2.35778	16.0021	14.1406	306	Promoter (<=1kb)	4	10761310	10766756	5447	1	NM_141757	0	Cap-H2	Cap-H2
chr2L	7032470	7032819	Filter_SAM_or_BAM__output_SAM_or_BAM_on_data_207__bam_peak_712	388	.	3.77884	41.2856	38.8862	183	Promoter (<=1kb)	1	7032721	7037613	4893	1	NM_001298771	0	Caper	Caper
chr2L	7033328	7033548	Filter_SAM_or_BAM__output_SAM_or_BAM_on_data_207__bam_peak_713	31	.	1.46742	4.65568	3.15751	148	Promoter (<=1kb)	1	7032721	7037878	5158	1	NM_135251	608	Caper	Caper
chr3L	18672217	18672535	Filter_SAM_or_BAM__output_SAM_or_BAM_on_data_207__bam_peak_6229	112	.	2.80398	13.0551	11.2709	121	Promoter (<=1kb)	3	18668153	18673160	5008	2	NM_144414	625	Capr	Capr
chr3L	18673090	18673294	Filter_SAM_or_BAM__output_SAM_or_BAM_on_data_207__bam_peak_6230	83	.	2.61916	10.044	8.34687	29	Promoter (<=1kb)	3	18668153	18673160	5008	2	NM_144414	0	Capr	Capr
chr3L	13228320	13228987	Filter_SAM_or_BAM__output_SAM_or_BAM_on_data_207__bam_peak_5669	920	.	4.81769	95.6578	92.0821	348	Promoter (<=1kb)	3	13228692	13279642	50951	1	NM_001043139	0	caps	caps
chr2L	1157524	1158433	Filter_SAM_or_BAM__output_SAM_or_BAM_on_data_207__bam_peak_153	378	.	2.70024	40.2031	37.8254	652	Promoter (<=1kb)	1	1151678	1158262	6585	2	NM_001038780	0	capt	capt
chr2L	3889708	3890025	Filter_SAM_or_BAM__output_SAM_or_BAM_on_data_207__bam_peak_435	159	.	2.84274	17.8675	15.9597	126	Promoter (<=1kb)	1	3872660	3890025	17366	2	NM_164567	0	capu	capu
chr2L	3890112	3890312	Filter_SAM_or_BAM__output_SAM_or_BAM_on_data_207__bam_peak_436	54	.	1.97466	7.06981	5.47256	48	Promoter (<=1kb)	1	3872660	3890031	17372	2	NM_001144315	-82	capu	capu
chr2L	3896785	3897370	Filter_SAM_or_BAM__output_SAM_or_BAM_on_data_207__bam_peak_438	852	.	4.46122	88.6568	85.2477	982	Promoter (<=1kb)	1	3872660	3896108	23449	2	NM_164566	-678	capu	capu
chr3R	21822576	21822993	Filter_SAM_or_BAM__output_SAM_or_BAM_on_data_207__bam_peak_8492	70	.	2.14381	8.74797	7.09157	278	Promoter (<=1kb)	4	21783400	21822674	39275	2	NM_001170210	0	CASK	CASK
chr2L	17477705	17478052	Filter_SAM_or_BAM__output_SAM_or_BAM_on_data_207__bam_peak_1693	300	.	2.87968	32.2359	30.0173	155	Promoter (<=1kb)	1	17474912	17477888	2977	2	NM_058106	0	cass	cass
chr3L	18822451	18823116	Filter_SAM_or_BAM__output_SAM_or_BAM_on_data_207__bam_peak_6256	611	.	4.86711	64.0501	61.1953	375	Promoter (<=1kb)	3	18822604	18828188	5585	1	NM_080483	0	Cat	Cat
chr2R	7823441	7823785	Filter_SAM_or_BAM__output_SAM_or_BAM_on_data_207__bam_peak_2372	79	.	2.34423	9.67265	7.98801	182	Promoter (<=1kb)	2	7815339	7823569	8231	2	NM_001347753	0	cathD	cathD
chr3L	12609217	12609742	Filter_SAM_or_BAM__output_SAM_or_BAM_on_data_207__bam_peak_5621	1007	.	9.2224	104.507	100.715	230	Promoter (<=1kb)	3	12609631	12621798	12168	1	NM_079322	0	caup	caup
chr3L	8424727	8425357	Filter_SAM_or_BAM__output_SAM_or_BAM_on_data_207__bam_peak_5175	317	.	3.85492	34.0421	31.7871	480	Promoter (<=1kb)	3	8424954	8428655	3702	1	NM_168276	0	Cbl	Cbl
chr2R	13450415	13450776	Filter_SAM_or_BAM__output_SAM_or_BAM_on_data_207__bam_peak_3065	135	.	2.65238	15.3846	13.539	104	Promoter (<=1kb)	2	13450586	13453393	2808	1	NM_001259368	0	cbs	cbs
chr2L	478661	478867	Filter_SAM_or_BAM__output_SAM_or_BAM_on_data_207__bam_peak_72	125	.	2.23446	14.4031	12.583	145	Promoter (<=1kb)	1	476446	479688	3243	2	NM_001272903	821	cbt	cbt
chr2L	479113	479261	Filter_SAM_or_BAM__output_SAM_or_BAM_on_data_207__bam_peak_73	724	.	4.02701	75.5118	72.4096	1991	Promoter (<=1kb)	1	476446	479688	3243	2	NM_001272903	427	cbt	cbt
chr2L	479417	479959	Filter_SAM_or_BAM__output_SAM_or_BAM_on_data_207__bam_peak_73	724	.	4.02701	75.5118	72.4096	1991	Promoter (<=1kb)	1	476446	479688	3243	2	NM_001272903	0	cbt	cbt
chr2L	8040870	8041209	Filter_SAM_or_BAM__output_SAM_or_BAM_on_data_207__bam_peak_839	492	.	4.58138	51.8414	49.2336	169	Promoter (<=1kb)	1	8041106	8041879	774	1	NM_135334	0	CCDC53	CCDC53
chr3L	11708870	11709025	Filter_SAM_or_BAM__output_SAM_or_BAM_on_data_207__bam_peak_5553	36	.	1.88249	5.13424	3.61385	69	Promoter (<=1kb)	3	11708979	11710570	1592	1	NM_206340	0	Ccdc56	Ccdc56
chr3L	19804985	19805309	Filter_SAM_or_BAM__output_SAM_or_BAM_on_data_207__bam_peak_6364	168	.	3.00192	18.8128	16.8828	176	Promoter (<=1kb)	3	19805181	19806932	1752	1	NM_140893	0	Ccdc58	Ccdc58
chr3R	15371892	15372096	Filter_SAM_or_BAM__output_SAM_or_BAM_on_data_207__bam_peak_7841	86	.	2.13269	10.3649	8.65777	46	Promoter (<=1kb)	4	15371957	15374237	2281	1	NM_142202	0	Ccm3	Ccm3
chr3R	22491485	22491688	Filter_SAM_or_BAM__output_SAM_or_BAM_on_data_207__bam_peak_8558	67	.	1.92951	8.43078	6.78514	33	Promoter (<=1kb)	4	22489105	22491439	2335	2	NM_170016	-47	CCT1	CCT1
chrX	9089352	9089635	Filter_SAM_or_BAM__output_SAM_or_BAM_on_data_207__bam_peak_10441	261	.	4.34578	28.2716	26.134	112	Promoter (<=1kb)	6	9089513	9092826	3314	1	NM_132296	0	CCT2	CCT2
chr2L	12692834	12693055	Filter_SAM_or_BAM__output_SAM_or_BAM_on_data_207__bam_peak_1308	153	.	2.94805	17.2121	15.3205	54	Promoter (<=1kb)	1	12690336	12692934	2599	2	NM_135735	0	CCT4	CCT4
chr2R	12174698	12174929	Filter_SAM_or_BAM__output_SAM_or_BAM_on_data_207__bam_peak_2908	144	.	2.56306	16.28	14.4114	89	Promoter (<=1kb)	2	12174802	12177516	2715	1	NM_078983	0	CCT5	CCT5
chr3R	8801446	8801797	Filter_SAM_or_BAM__output_SAM_or_BAM_on_data_207__bam_peak_7150	193	.	2.53935	21.3168	19.3289	176	Promoter (<=1kb)	4	8801564	8806234	4671	1	NM_141578	0	CCT7	CCT7
chr2R	8906896	8907130	Filter_SAM_or_BAM__output_SAM_or_BAM_on_data_207__bam_peak_2481	109	.	2.52675	12.7539	10.9782	61	Promoter (<=1kb)	2	8904844	8906990	2147	2	NM_136574	0	CCT8	CCT8
chr3R	7977412	7978005	Filter_SAM_or_BAM__output_SAM_or_BAM_on_data_207__bam_peak_7061	327	.	3.79868	35.0206	32.7461	842	Promoter (<=1kb)	4	7974409	7977769	3361	2	NM_001275427	0	CD98hc	CD98hc
chr2L	7809501	7809991	Filter_SAM_or_BAM__output_SAM_or_BAM_on_data_207__bam_peak_801	906	.	5.63989	94.159	90.6193	868	Promoter (<=1kb)	1	7801668	7810703	9036	2	NM_001298792	712	cdc14	cdc14
chr2L	7810494	7810892	Filter_SAM_or_BAM__output_SAM_or_BAM_on_data_207__bam_peak_802	285	.	3.0503	30.7014	28.5139	104	Promoter (<=1kb)	1	7801668	7810703	9036	2	NM_001298792	0	cdc14	cdc14
chr3R	23280931	23281293	Filter_SAM_or_BAM__output_SAM_or_BAM_on_data_207__bam_peak_8644	177	.	3.12564	19.7264	17.7749	349	Promoter (<=1kb)	4	23281201	23284123	2923	1	NM_058049	0	Cdc16	Cdc16
chr3L	7249233	7249551	Filter_SAM_or_BAM__output_SAM_or_BAM_on_data_207__bam_peak_5042	179	.	2.89044	19.9353	17.9788	148	Promoter (<=1kb)	3	7245481	7249340	3860	2	NM_001274574	0	Cdc27	Cdc27
chr2R	10068642	10068859	Filter_SAM_or_BAM__output_SAM_or_BAM_on_data_207__bam_peak_2641	127	.	2.77985	14.5679	12.7435	143	Promoter (<=1kb)	2	10067217	10068702	1486	2	NM_078950	0	Cdc2rk	Cdc2rk
chr3L	1795227	1795624	Filter_SAM_or_BAM__output_SAM_or_BAM_on_data_207__bam_peak_4555	229	.	3.54524	24.9838	22.9151	339	Promoter (<=1kb)	3	1795392	1797307	1916	1	NM_057658	0	Cdc37	Cdc37
chr3L	8634063	8634269	Filter_SAM_or_BAM__output_SAM_or_BAM_on_data_207__bam_peak_5197	78	.	2.63666	9.53355	7.85244	129	Promoter (<=1kb)	3	8631509	8634069	2561	2	NM_139990	0	Cdc6	Cdc6
chrX	6654402	6654766	Filter_SAM_or_BAM__output_SAM_or_BAM_on_data_207__bam_peak_10188	132	.	3.4031	15.0669	13.2297	183	Promoter (<=1kb)	6	6654541	6659709	5169	1	NM_167080	0	Cdc7	Cdc7
chr3R	4910376	4910692	Filter_SAM_or_BAM__output_SAM_or_BAM_on_data_207__bam_peak_6803	351	.	3.85245	37.4697	35.1463	153	Promoter (<=1kb)	4	4910552	4924161	13610	1	NM_141248	0	Cdep	Cdep
chr3R	19094096	19094370	Filter_SAM_or_BAM__output_SAM_or_BAM_on_data_207__bam_peak_8199	138	.	2.61077	15.7419	13.8873	115	Promoter (<=1kb)	4	19044882	19094270	49389	2	NM_001260262	0	cdi	cdi
chr3L	21516881	21517273	Filter_SAM_or_BAM__output_SAM_or_BAM_on_data_207__bam_peak_6570	114	.	2.08819	13.2437	11.4547	156	Promoter (<=1kb)	3	21517187	21522156	4970	1	NM_001275238	0	Cdk12	Cdk12
chr3R	20735450	20735698	Filter_SAM_or_BAM__output_SAM_or_BAM_on_data_207__bam_peak_8331	151	.	2.82584	17.014	15.1271	84	Promoter (<=1kb)	4	20735623	20737330	1708	1	NM_079696	0	Cdk2	Cdk2
chrX	11137681	11137980	Filter_SAM_or_BAM__output_SAM_or_BAM_on_data_207__bam_peak_10595	158	.	3.46628	17.7561	15.8511	139	Promoter (<=1kb)	6	11137859	11139689	1831	1	NM_001272510	0	CDK2AP1	CDK2AP1
chr2R	16578636	16578972	Filter_SAM_or_BAM__output_SAM_or_BAM_on_data_207__bam_peak_3406	483	.	5.03797	50.9812	48.3899	184	Promoter (<=1kb)	2	16579470	16585448	5979	1	NM_166185	-498	Cdk4	Cdk4
chr2R	16579277	16579521	Filter_SAM_or_BAM__output_SAM_or_BAM_on_data_207__bam_peak_3407	102	.	2.18319	12.0442	10.2881	176	Promoter (<=1kb)	2	16579470	16585448	5979	1	NM_166185	0	Cdk4	Cdk4
chr2R	16579578	16579969	Filter_SAM_or_BAM__output_SAM_or_BAM_on_data_207__bam_peak_3408	411	.	4.08925	43.5608	41.116	254	Promoter (<=1kb)	2	16579765	16585448	5684	1	NM_001299565	0	Cdk4	Cdk4
chr3L	8127808	8128173	Filter_SAM_or_BAM__output_SAM_or_BAM_on_data_207__bam_peak_5149	154	.	3.08264	17.3685	15.4727	183	Promoter (<=1kb)	3	8128054	8131675	3622	1	NM_079922	0	Cds	Cds
chr2R	9444722	9444952	Filter_SAM_or_BAM__output_SAM_or_BAM_on_data_207__bam_peak_2559	711	.	5.94749	74.2674	71.1915	315	Promoter (<=1kb)	2	9434669	9444937	10269	2	NM_001259296	0	ced-6	ced-6
chr2L	13835207	13835672	Filter_SAM_or_BAM__output_SAM_or_BAM_on_data_207__bam_peak_1415	364	.	3.29851	38.8249	36.4746	226	Promoter (<=1kb)	1	13835564	13898712	63149	1	NM_165067	0	CenG1A	CenG1A
chr3R	8563889	8564178	Filter_SAM_or_BAM__output_SAM_or_BAM_on_data_207__bam_peak_7131	53	.	1.8235	6.98102	5.3871	141	Promoter (<=1kb)	4	8564105	8569055	4951	1	NM_001300308	0	Cenp-C	Cenp-C
chr3L	15116588	15116801	Filter_SAM_or_BAM__output_SAM_or_BAM_on_data_207__bam_peak_5822	108	.	2.30348	12.5754	10.805	99	Promoter (<=1kb)	3	15116737	15128029	11293	1	NM_001202179	0	Cep135	Cep135
chr3R	5367579	5367845	Filter_SAM_or_BAM__output_SAM_or_BAM_on_data_207__bam_peak_6856	73	.	2.01907	9.02144	7.35762	189	Promoter (<=1kb)	4	5358873	5368306	9434	2	NM_169050	461	Cerk	Cerk
chr3R	5368141	5368519	Filter_SAM_or_BAM__output_SAM_or_BAM_on_data_207__bam_peak_6857	289	.	3.55863	31.1205	28.9249	179	Promoter (<=1kb)	4	5358873	5368306	9434	2	NM_169050	0	Cerk	Cerk
chr3L	8289717	8290255	Filter_SAM_or_BAM__output_SAM_or_BAM_on_data_207__bam_peak_5160	134	.	2.46027	15.2884	13.4456	279	Promoter (<=1kb)	3	8282528	8289870	7343	2	NM_139942	0	cert	cert
chrX	15577921	15578192	Filter_SAM_or_BAM__output_SAM_or_BAM_on_data_207__bam_peak_10975	98	.	2.76144	11.5834	9.84098	132	Promoter (<=1kb)	6	15576986	15577998	1013	2	NM_132815	0	cerv	cerv
chr2R	14173430	14173876	Filter_SAM_or_BAM__output_SAM_or_BAM_on_data_207__bam_peak_3162	445	.	3.98775	47.0312	44.5176	275	Promoter (<=1kb)	2	14173693	14180228	6536	1	NM_001144194	0	cg	cg
chr3R	28635030	28635357	Filter_SAM_or_BAM__output_SAM_or_BAM_on_data_207__bam_peak_9152	365	.	4.27713	38.894	36.5424	291	Promoter (<=1kb)	4	28607939	28635099	27161	2	NM_143367	0	CG10011	CG10011
chr3R	28635518	28635927	Filter_SAM_or_BAM__output_SAM_or_BAM_on_data_207__bam_peak_9153	442	.	3.94617	46.7361	44.2283	150	Promoter (<=1kb)	4	28607939	28635099	27161	2	NM_143367	-420	CG10011	CG10011
chr3R	12222145	12222439	Filter_SAM_or_BAM__output_SAM_or_BAM_on_data_207__bam_peak_7517	396	.	3.26096	42.0624	39.6478	133	Promoter (<=1kb)	4	12222387	12224048	1662	1	NM_141907	0	CG10014	CG10014
chr2L	3730258	3730447	Filter_SAM_or_BAM__output_SAM_or_BAM_on_data_207__bam_peak_410	700	.	5.50048	73.1322	70.0814	298	Promoter (<=1kb)	1	3730466	3753407	22942	1	NM_001273073	-19	CG10019	CG10019
chr3R	12350533	12350868	Filter_SAM_or_BAM__output_SAM_or_BAM_on_data_207__bam_peak_7524	182	.	3.36364	20.2206	18.2578	170	Promoter (<=1kb)	4	12348987	12350644	1658	2	NM_141919	0	CG10038	CG10038
chr2R	19364041	19364327	Filter_SAM_or_BAM__output_SAM_or_BAM_on_data_207__bam_peak_3753	470	.	6.79147	49.6553	47.0895	140	Promoter (<=1kb)	2	19363641	19367294	3654	1	NM_137570	401	CG10051	CG10051
chr3R	7186533	7186752	Filter_SAM_or_BAM__output_SAM_or_BAM_on_data_207__bam_peak_7008	57	.	2.01378	7.38813	5.7798	173	Promoter (<=1kb)	4	7184101	7186673	2573	2	NM_141446	0	CG10055	CG10055
chr3L	6955807	6956098	Filter_SAM_or_BAM__output_SAM_or_BAM_on_data_207__bam_peak_5021	100	.	2.25395	11.827	10.0774	66	Promoter (<=1kb)	3	6949491	6955904	6414	2	NM_139805	0	CG10077	CG10077
chr2R	21646015	21646348	Filter_SAM_or_BAM__output_SAM_or_BAM_on_data_207__bam_peak_3959	582	.	4.45708	61.0207	58.2295	1167	Promoter (<=1kb)	2	21646177	21657935	11759	1	NM_166466	0	CG10082	CG10082
chr3L	6756366	6756649	Filter_SAM_or_BAM__output_SAM_or_BAM_on_data_207__bam_peak_5015	202	.	3.56737	22.2781	20.2685	109	Promoter (<=1kb)	3	6754017	6756497	2481	2	NM_001274554	0	CG10103	CG10103
chr3R	12857303	12857962	Filter_SAM_or_BAM__output_SAM_or_BAM_on_data_207__bam_peak_7583	896	.	5.87906	93.1909	89.6738	654	Promoter (<=1kb)	4	12855544	12857632	2089	2	NM_141977	0	CG10126	CG10126
chr3R	12858154	12858524	Filter_SAM_or_BAM__output_SAM_or_BAM_on_data_207__bam_peak_7583	896	.	5.87906	93.1909	89.6738	654	Promoter (<=1kb)	4	12855544	12857632	2089	2	NM_141977	-523	CG10126	CG10126
chr3L	6488405	6488673	Filter_SAM_or_BAM__output_SAM_or_BAM_on_data_207__bam_peak_4998	122	.	2.63795	14.0166	12.2068	89	Promoter (<=1kb)	3	6486167	6488424	2258	2	NM_001274548	0	CG10147	CG10147
chr2L	19528222	19528761	Filter_SAM_or_BAM__output_SAM_or_BAM_on_data_207__bam_peak_1851	391	.	3.1029	41.5982	39.1927	408	Promoter (<=1kb)	1	19527281	19528323	1043	2	NM_001299157	0	CG10165	CG10165
chr2L	19526211	19526679	Filter_SAM_or_BAM__output_SAM_or_BAM_on_data_207__bam_peak_1850	141	.	2.24046	16.0422	14.1795	164	Promoter (<=1kb)	1	19525434	19526368	935	2	NM_136136	0	CG10166	CG10166
chr3L	13387701	13388056	Filter_SAM_or_BAM__output_SAM_or_BAM_on_data_207__bam_peak_5675	140	.	3.13003	15.922	14.0629	190	Promoter (<=1kb)	3	13385946	13387907	1962	2	NM_168542	0	CG10171	CG10171
chr3R	23522313	23522646	Filter_SAM_or_BAM__output_SAM_or_BAM_on_data_207__bam_peak_8680	93	.	2.21692	11.1148	9.38557	163	Promoter (<=1kb)	4	23520146	23521583	1438	2	NM_142893	-731	CG10177	CG10177
chr3R	23605294	23605519	Filter_SAM_or_BAM__output_SAM_or_BAM_on_data_207__bam_peak_8685	100	.	3.2956	11.8341	10.0839	103	Promoter (<=1kb)	4	23602507	23605495	2989	2	NM_142904	0	CG10184	CG10184
chr3R	16068294	16068559	Filter_SAM_or_BAM__output_SAM_or_BAM_on_data_207__bam_peak_7908	262	.	3.03597	28.3743	26.2344	104	Promoter (<=1kb)	4	16060589	16067594	7006	2	NM_142264	-701	CG10185	CG10185
chr2L	19508683	19508981	Filter_SAM_or_BAM__output_SAM_or_BAM_on_data_207__bam_peak_1848	237	.	3.04654	25.8087	23.7223	160	Promoter (<=1kb)	1	19502335	19508764	6430	2	NM_001273659	0	CG10188	CG10188
chr2L	19493119	19493449	Filter_SAM_or_BAM__output_SAM_or_BAM_on_data_207__bam_peak_1847	155	.	2.79583	17.4137	15.5168	182	Promoter (<=1kb)	1	19491647	19493253	1607	2	NM_001273656	0	CG10189	CG10189
chr2R	14848060	14848530	Filter_SAM_or_BAM__output_SAM_or_BAM_on_data_207__bam_peak_3231	299	.	3.99306	32.1368	29.9207	318	Promoter (<=1kb)	2	14846064	14848366	2303	2	NM_001274053	0	CG10209	CG10209
chr3R	23767457	23767693	Filter_SAM_or_BAM__output_SAM_or_BAM_on_data_207__bam_peak_8703	99	.	2.34669	11.6709	9.92561	79	Promoter (<=1kb)	4	23766519	23767488	970	2	NM_142927	0	CG10214	CG10214
chr3R	23721981	23722278	Filter_SAM_or_BAM__output_SAM_or_BAM_on_data_207__bam_peak_8693	185	.	2.67736	20.5039	18.5345	173	Promoter (<=1kb)	4	23719343	23721625	2283	2	NM_142918	-357	CG10232	CG10232
chr3R	6380295	6380498	Filter_SAM_or_BAM__output_SAM_or_BAM_on_data_207__bam_peak_6935	70	.	2.08224	8.7066	7.05205	156	Promoter (<=1kb)	4	6378396	6380328	1933	2	NM_141395	0	CG1024	CG1024
chr3R	23694596	23694962	Filter_SAM_or_BAM__output_SAM_or_BAM_on_data_207__bam_peak_8688	262	.	3.03597	28.3743	26.2344	125	Promoter (<=1kb)	4	23689007	23694726	5720	2	NM_001275949	0	CG10254	CG10254
chr3R	16043123	16043369	Filter_SAM_or_BAM__output_SAM_or_BAM_on_data_207__bam_peak_7904	228	.	3.43356	24.9052	22.8381	92	Promoter (<=1kb)	4	16043498	16044832	1335	1	NM_142261	-129	CG10264	CG10264
chr2L	18484441	18484930	Filter_SAM_or_BAM__output_SAM_or_BAM_on_data_207__bam_peak_1731	469	.	4.63238	49.4995	46.9374	169	Promoter (<=1kb)	1	18472964	18484513	11550	2	NM_001169535	0	CG10283	CG10283
chr3R	6368733	6369023	Filter_SAM_or_BAM__output_SAM_or_BAM_on_data_207__bam_peak_6934	200	.	3.31206	22.0038	20.0006	165	Promoter (<=1kb)	4	6368965	6371115	2151	1	NM_141392	0	CG10286	CG10286
chr2R	21634488	21634884	Filter_SAM_or_BAM__output_SAM_or_BAM_on_data_207__bam_peak_3955	233	.	2.47711	25.4364	23.3579	188	Promoter (<=1kb)	2	21634679	21638399	3721	1	NM_001274195	0	CG10321	CG10321
chr2R	23601678	23602040	Filter_SAM_or_BAM__output_SAM_or_BAM_on_data_207__bam_peak_4126	315	.	3.25296	33.8386	31.5876	180	Promoter (<=1kb)	2	23600914	23601773	860	2	NM_137965	0	CG10332	CG10332
chr2L	18606690	18606923	Filter_SAM_or_BAM__output_SAM_or_BAM_on_data_207__bam_peak_1748	106	.	2.19434	12.3846	10.6193	126	Promoter (<=1kb)	1	18606832	18609550	2719	1	NM_136044	0	CG10333	CG10333
chr2L	18689495	18689829	Filter_SAM_or_BAM__output_SAM_or_BAM_on_data_207__bam_peak_1761	74	.	1.93843	9.07922	7.41229	161	Promoter (<=1kb)	1	18689528	18690906	1379	1	NM_136051	0	CG10336	CG10336
chr2L	19547279	19547314	Filter_SAM_or_BAM__output_SAM_or_BAM_on_data_207__bam_peak_1854	462	.	3.83106	48.8229	46.2735	147	Promoter (<=1kb)	1	19545376	19546959	1584	2	NM_136142	-321	CG10337	CG10337
chr2L	18695564	18695879	Filter_SAM_or_BAM__output_SAM_or_BAM_on_data_207__bam_peak_1765	227	.	2.76677	24.7827	22.7182	190	Promoter (<=1kb)	1	18695664	18698571	2908	1	NM_001299127	0	CG10338	CG10338
chr2L	18698614	18698841	Filter_SAM_or_BAM__output_SAM_or_BAM_on_data_207__bam_peak_1766	140	.	2.15296	15.8859	14.0276	72	Promoter (<=1kb)	1	18698714	18700645	1932	1	NM_001103708	0	CG10341	CG10341
chr2L	18703275	18703489	Filter_SAM_or_BAM__output_SAM_or_BAM_on_data_207__bam_peak_1768	71	.	2.15251	8.82097	7.16225	131	Promoter (<=1kb)	1	18703473	18704454	982	1	NM_136056	0	CG10343	CG10343
chr2R	22426763	22427316	Filter_SAM_or_BAM__output_SAM_or_BAM_on_data_207__bam_peak_4032	500	.	3.92264	52.6464	50.0229	248	Promoter (<=1kb)	2	22425733	22426977	1245	2	NM_137827	0	CG10344	CG10344
chr2L	18732477	18733324	Filter_SAM_or_BAM__output_SAM_or_BAM_on_data_207__bam_peak_1772	617	.	5.53192	64.5872	61.7206	782	Promoter (<=1kb)	1	18714453	18732524	18072	2	NM_001299130	0	CG10348	CG10348
chrX	11887070	11887376	Filter_SAM_or_BAM__output_SAM_or_BAM_on_data_207__bam_peak_10680	515	.	5.07917	54.2495	51.5946	152	Promoter (<=1kb)	6	11877737	11887162	9426	2	NM_001272540	0	CG10353	CG10353
chr2L	19583906	19584284	Filter_SAM_or_BAM__output_SAM_or_BAM_on_data_207__bam_peak_1863	207	.	2.78986	22.7553	20.7351	135	Promoter (<=1kb)	1	19584235	19586440	2206	1	NM_136151	0	CG10366	CG10366
chr2L	18702907	18703191	Filter_SAM_or_BAM__output_SAM_or_BAM_on_data_207__bam_peak_1767	381	.	4.29316	40.5577	38.1726	136	Promoter (<=1kb)	1	18700606	18703105	2500	2	NM_136055	0	CG10376	CG10376
chr2L	18695235	18695432	Filter_SAM_or_BAM__output_SAM_or_BAM_on_data_207__bam_peak_1764	301	.	3.40887	32.4026	30.1811	116	Promoter (<=1kb)	1	18690904	18695426	4523	2	NM_136052	0	CG10383	CG10383
chr2R	5350544	5350769	Filter_SAM_or_BAM__output_SAM_or_BAM_on_data_207__bam_peak_2119	101	.	2.6036	11.9097	10.1579	131	Promoter (<=1kb)	2	5350740	5351972	1233	1	NM_165428	0	CG10395	CG10395
chr2L	18605033	18605338	Filter_SAM_or_BAM__output_SAM_or_BAM_on_data_207__bam_peak_1747	158	.	2.68202	17.7214	15.8171	189	Promoter (<=1kb)	1	18599755	18605249	5495	2	NM_001299119	0	CG10413	CG10413
chr3L	12336277	12336753	Filter_SAM_or_BAM__output_SAM_or_BAM_on_data_207__bam_peak_5592	299	.	4.08824	32.1514	29.9347	301	Promoter (<=1kb)	3	12336676	12337236	561	1	NM_140313	0	CG10418	CG10418
chr3R	25262381	25262765	Filter_SAM_or_BAM__output_SAM_or_BAM_on_data_207__bam_peak_8877	272	.	3.86712	29.3626	27.2022	138	Promoter (<=1kb)	4	25260963	25262498	1536	2	NM_143106	0	CG10425	CG10425
chr2R	21608033	21608546	Filter_SAM_or_BAM__output_SAM_or_BAM_on_data_207__bam_peak_3951	618	.	3.91805	64.7499	61.8797	340	Promoter (<=1kb)	2	21605676	21608125	2450	2	NM_001299754	0	CG10433	CG10433
chr3R	8013112	8013319	Filter_SAM_or_BAM__output_SAM_or_BAM_on_data_207__bam_peak_7066	42	.	1.95353	5.7536	4.20781	118	Promoter (<=1kb)	4	8010907	8013201	2295	2	NM_141502	0	CG10435	CG10435
chr2R	20274426	20274740	Filter_SAM_or_BAM__output_SAM_or_BAM_on_data_207__bam_peak_3829	299	.	4.41552	32.1727	29.9556	155	Promoter (<=1kb)	2	20271653	20274499	2847	2	NM_137621	0	CG10444	CG10444
chr3R	7920202	7920577	Filter_SAM_or_BAM__output_SAM_or_BAM_on_data_207__bam_peak_7056	89	.	1.97649	10.6735	8.95765	241	Promoter (<=1kb)	4	7916599	7920299	3701	2	NM_001260045	0	CG10445	CG10445
chr2L	19758612	19758973	Filter_SAM_or_BAM__output_SAM_or_BAM_on_data_207__bam_peak_1867	314	.	3.22696	33.677	31.4298	171	Promoter (<=1kb)	1	19758879	19760986	2108	1	NM_136156	0	CG10463	CG10463
chr2L	19791625	19792211	Filter_SAM_or_BAM__output_SAM_or_BAM_on_data_207__bam_peak_1870	317	.	3.44122	33.9552	31.7024	442	Promoter (<=1kb)	1	19792104	19792782	679	1	NM_001273672	0	CG10466	CG10466
chr2L	19049026	19049244	Filter_SAM_or_BAM__output_SAM_or_BAM_on_data_207__bam_peak_1798	69	.	1.86228	8.57416	6.92419	157	Promoter (<=1kb)	1	19049076	19049884	809	1	NM_136092	0	CG10470	CG10470
chr2L	19053973	19054276	Filter_SAM_or_BAM__output_SAM_or_BAM_on_data_207__bam_peak_1800	175	.	3.38858	19.5119	17.5656	142	Promoter (<=1kb)	1	19054078	19058410	4333	1	NM_001103709	0	CG10492	CG10492
chr2L	19063063	19063459	Filter_SAM_or_BAM__output_SAM_or_BAM_on_data_207__bam_peak_1801	261	.	3.01281	28.2476	26.1105	177	Promoter (<=1kb)	1	19063295	19064726	1432	1	NM_136095	0	CG10495	CG10495
chr3L	21210105	21210327	Filter_SAM_or_BAM__output_SAM_or_BAM_on_data_207__bam_peak_6528	89	.	3.01521	10.6927	8.97603	92	Promoter (<=1kb)	3	21210215	21216051	5837	1	NM_001259930	0	CG10508	CG10508
chr3L	21202642	21203131	Filter_SAM_or_BAM__output_SAM_or_BAM_on_data_207__bam_peak_6526	348	.	3.52253	37.1278	34.8111	426	Promoter (<=1kb)	3	21202920	21208092	5173	1	NM_141032	0	CG10512	CG10512
chr3L	21205333	21205761	Filter_SAM_or_BAM__output_SAM_or_BAM_on_data_207__bam_peak_6527	904	.	5.65301	93.9605	90.4249	500	Promoter (<=1kb)	3	21205580	21208092	2513	1	NM_168890	0	CG10512	CG10512
chr3L	15967740	15968368	Filter_SAM_or_BAM__output_SAM_or_BAM_on_data_207__bam_peak_5902	191	.	3.60391	21.0907	19.1083	134	Promoter (<=1kb)	3	15968204	15969902	1699	1	NM_140562	0	CG10516	CG10516
chr2R	21072520	21072950	Filter_SAM_or_BAM__output_SAM_or_BAM_on_data_207__bam_peak_3881	488	.	3.35499	51.4838	48.8826	253	Promoter (<=1kb)	2	21070368	21072789	2422	2	NM_137700	0	CG10527	CG10527
chr2R	20996029	20996328	Filter_SAM_or_BAM__output_SAM_or_BAM_on_data_207__bam_peak_3868	166	.	3.12664	18.5243	16.6009	144	Promoter (<=1kb)	2	20996220	21007740	11521	1	NM_001274183	0	CG10543	CG10543
chr2R	20996445	20997021	Filter_SAM_or_BAM__output_SAM_or_BAM_on_data_207__bam_peak_3869	976	.	6.2924	101.387	97.6738	617	Promoter (<=1kb)	2	20996641	21006641	10001	1	NM_166416	0	CG10543	CG10543
chr2R	21000099	21000742	Filter_SAM_or_BAM__output_SAM_or_BAM_on_data_207__bam_peak_3873	661	.	5.45192	69.0937	66.1302	182	Promoter (<=1kb)	2	21000475	21006641	6167	1	NM_176241	0	CG10543	CG10543
chr3R	25308152	25308626	Filter_SAM_or_BAM__output_SAM_or_BAM_on_data_207__bam_peak_8884	632	.	3.68728	66.1952	63.294	272	Promoter (<=1kb)	4	25306407	25308391	1985	2	NM_143123	0	CG10550	CG10550
chrX	8398653	8398904	Filter_SAM_or_BAM__output_SAM_or_BAM_on_data_207__bam_peak_10362	52	.	2.17928	6.81455	5.22567	60	Promoter (<=1kb)	6	8398940	8403942	5003	1	NM_132246	-36	CG10555	CG10555
chr2L	19114240	19114472	Filter_SAM_or_BAM__output_SAM_or_BAM_on_data_207__bam_peak_1804	184	.	2.84135	20.4637	18.4952	86	Promoter (<=1kb)	1	19114401	19116570	2170	1	NM_057260	0	CG10561	CG10561
chr3L	21135952	21136297	Filter_SAM_or_BAM__output_SAM_or_BAM_on_data_207__bam_peak_6513	645	.	3.93485	67.5232	64.5932	149	Promoter (<=1kb)	3	21133250	21136052	2803	2	NM_141027	0	CG10565	CG10565
chr3L	5765352	5765558	Filter_SAM_or_BAM__output_SAM_or_BAM_on_data_207__bam_peak_4947	72	.	2.70199	8.93946	7.27768	57	Promoter (<=1kb)	3	5762027	5765501	3475	2	NM_139727	0	CG10576	CG10576
chr2L	18839522	18839941	Filter_SAM_or_BAM__output_SAM_or_BAM_on_data_207__bam_peak_1780	518	.	4.21745	54.525	51.8644	249	Promoter (<=1kb)	1	18833710	18839679	5970	2	NM_001144367	0	CG10600	CG10600
chr2L	18857622	18857992	Filter_SAM_or_BAM__output_SAM_or_BAM_on_data_207__bam_peak_1781	38	.	1.62002	5.34316	3.81511	185	Promoter (<=1kb)	1	18855126	18857679	2554	2	NM_165268	0	CG10602	CG10602
chr2L	18859151	18859519	Filter_SAM_or_BAM__output_SAM_or_BAM_on_data_207__bam_peak_1782	197	.	2.47552	21.7328	19.7359	221	Promoter (<=1kb)	1	18855126	18859248	4123	2	NM_136072	0	CG10602	CG10602
chr3L	12471430	12471796	Filter_SAM_or_BAM__output_SAM_or_BAM_on_data_207__bam_peak_5607	106	.	2.38619	12.4197	10.6529	102	Promoter (<=1kb)	3	12471728	12474279	2552	1	NM_001259805	0	CG10616	CG10616
chr2L	18957031	18957384	Filter_SAM_or_BAM__output_SAM_or_BAM_on_data_207__bam_peak_1787	242	.	3.3291	26.3401	24.2423	216	Promoter (<=1kb)	1	18955481	18957080	1600	2	NM_001299144	0	CG10623	CG10623
chr2L	19756766	19757037	Filter_SAM_or_BAM__output_SAM_or_BAM_on_data_207__bam_peak_1866	46	.	1.8454	6.22648	4.66104	252	Promoter (<=1kb)	1	19742817	19756904	14088	2	NM_136154	0	CG10631	CG10631
chr3L	12489969	12491059	Filter_SAM_or_BAM__output_SAM_or_BAM_on_data_207__bam_peak_5609	1188	.	6.08821	123.081	118.844	258	Promoter (<=1kb)	3	12486668	12490075	3408	2	NM_001274834	0	CG10660	CG10660
chr3L	5136254	5136454	Filter_SAM_or_BAM__output_SAM_or_BAM_on_data_207__bam_peak_4899	229	.	4.0871	25.0112	22.9418	122	Promoter (<=1kb)	3	5135748	5136292	545	2	NM_139693	0	CG10674	CG10674
chr2R	19164017	19164343	Filter_SAM_or_BAM__output_SAM_or_BAM_on_data_207__bam_peak_3728	241	.	3.14865	26.2399	24.1444	171	Promoter (<=1kb)	2	19164143	19177082	12940	1	NM_001144239	0	CG10737	CG10737
chr2R	19164422	19164462	Filter_SAM_or_BAM__output_SAM_or_BAM_on_data_207__bam_peak_3729	86	.	1.98979	10.3366	8.63046	158	Promoter (<=1kb)	2	19164143	19178223	14081	1	NM_001144240	280	CG10737	CG10737
chr3R	4433811	4434080	Filter_SAM_or_BAM__output_SAM_or_BAM_on_data_207__bam_peak_6753	197	.	3.14225	21.701	19.7044	187	Promoter (<=1kb)	4	4433965	4436175	2211	1	NM_141214	0	CG1074	CG1074
chr2L	20091034	20091326	Filter_SAM_or_BAM__output_SAM_or_BAM_on_data_207__bam_peak_1892	180	.	2.094	20.001	18.0434	107	Promoter (<=1kb)	1	20089636	20091222	1587	2	NM_136178	0	CG10747	CG10747
chrX	7933209	7933507	Filter_SAM_or_BAM__output_SAM_or_BAM_on_data_207__bam_peak_10322	308	.	3.6059	33.1075	30.8716	100	Promoter (<=1kb)	6	7931745	7933332	1588	2	NM_132197	0	CG10778	CG10778
chr2R	21384214	21384444	Filter_SAM_or_BAM__output_SAM_or_BAM_on_data_207__bam_peak_3928	51	.	1.96516	6.74411	5.15934	55	Promoter (<=1kb)	2	21383227	21384391	1165	2	NM_001369962	0	CG10795	CG10795
chrX	3481013	3481364	Filter_SAM_or_BAM__output_SAM_or_BAM_on_data_207__bam_peak_9918	260	.	4.56845	28.1817	26.0458	124	Promoter (<=1kb)	6	3476463	3482322	5860	2	NM_001297910	958	CG10804	CG10804
chr3L	9859620	9859944	Filter_SAM_or_BAM__output_SAM_or_BAM_on_data_207__bam_peak_5364	138	.	2.2412	15.7184	13.8646	261	Promoter (<=1kb)	3	9857383	9859889	2507	2	NM_001169932	0	CG10809	CG10809
chr3L	3947314	3947594	Filter_SAM_or_BAM__output_SAM_or_BAM_on_data_207__bam_peak_4807	64	.	2.03854	8.04253	6.41135	187	Promoter (<=1kb)	3	3947891	3948687	797	1	NM_139585	-297	CG10853	CG10853
chr3L	3942235	3942621	Filter_SAM_or_BAM__output_SAM_or_BAM_on_data_207__bam_peak_4806	318	.	3.7856	34.0963	31.8403	195	Promoter (<=1kb)	3	3941008	3942465	1458	2	NM_139583	0	CG10863	CG10863
chr2L	2192347	2192571	Filter_SAM_or_BAM__output_SAM_or_BAM_on_data_207__bam_peak_245	95	.	2.02501	11.2948	9.56066	49	Promoter (<=1kb)	1	2189914	2192386	2473	2	NM_001258916	0	CG10874	CG10874
chr3R	20564001	20564302	Filter_SAM_or_BAM__output_SAM_or_BAM_on_data_207__bam_peak_8316	232	.	3.53044	25.3294	23.2532	275	Promoter (<=1kb)	4	20562486	20564067	1582	2	NM_142637	0	CG10877	CG10877
chr3R	20036004	20036241	Filter_SAM_or_BAM__output_SAM_or_BAM_on_data_207__bam_peak_8283	245	.	2.99306	26.656	24.5519	111	Promoter (<=1kb)	4	20033881	20036056	2176	2	NM_142606	0	CG10889	CG10889
chr3R	11557492	11557844	Filter_SAM_or_BAM__output_SAM_or_BAM_on_data_207__bam_peak_7445	164	.	2.82416	18.3777	16.4582	151	Promoter (<=1kb)	4	11557776	11559877	2102	1	NM_141826	0	CG10898	CG10898
chr3R	4360537	4361326	Filter_SAM_or_BAM__output_SAM_or_BAM_on_data_207__bam_peak_6745	722	.	4.30455	75.3569	72.2576	603	Promoter (<=1kb)	4	4359883	4366855	6973	1	NM_164343	655	CG1090	CG1090
chr3R	8030612	8030967	Filter_SAM_or_BAM__output_SAM_or_BAM_on_data_207__bam_peak_7069	252	.	3.36459	27.3833	25.264	185	Promoter (<=1kb)	4	8030827	8032145	1319	1	NM_141505	0	CG10903	CG10903
chr2R	23970058	23970426	Filter_SAM_or_BAM__output_SAM_or_BAM_on_data_207__bam_peak_4179	79	.	2.25311	9.66089	7.97685	107	Promoter (<=1kb)	2	23968941	23970073	1133	2	NM_001299871	0	CG10904	CG10904
chr2R	18158031	18158385	Filter_SAM_or_BAM__output_SAM_or_BAM_on_data_207__bam_peak_3600	287	.	3.36489	30.9594	28.7669	188	Promoter (<=1kb)	2	18158257	18160310	2054	1	NM_137453	0	CG10914	CG10914
chr2R	18160325	18160577	Filter_SAM_or_BAM__output_SAM_or_BAM_on_data_207__bam_peak_3601	182	.	3.57716	20.1689	18.2073	172	Promoter (<=1kb)	2	18160720	18164209	3490	1	NM_137455	-143	CG10915	CG10915
chr2R	18173588	18173948	Filter_SAM_or_BAM__output_SAM_or_BAM_on_data_207__bam_peak_3606	235	.	2.65408	25.624	23.5415	189	Promoter (<=1kb)	2	18173669	18174683	1015	1	NM_137459	0	CG10916	CG10916
chr3R	4266762	4267160	Filter_SAM_or_BAM__output_SAM_or_BAM_on_data_207__bam_peak_6736	289	.	3.63046	31.167	28.9704	166	Promoter (<=1kb)	4	4266770	4268316	1547	1	NM_164325	0	CG1092	CG1092
chr2R	17394339	17394678	Filter_SAM_or_BAM__output_SAM_or_BAM_on_data_207__bam_peak_3511	603	.	4.54375	63.2308	60.3932	162	Promoter (<=1kb)	2	17394593	17405171	10579	1	NM_079973	0	CG10939	CG10939
chr2L	20414962	20415211	Filter_SAM_or_BAM__output_SAM_or_BAM_on_data_207__bam_peak_1918	30	.	1.81981	4.52976	3.03757	169	Promoter (<=1kb)	1	20385293	20414800	29508	2	NM_136187	-163	CG10947	CG10947
chr3L	12849917	12850205	Filter_SAM_or_BAM__output_SAM_or_BAM_on_data_207__bam_peak_5649	146	.	2.97104	16.4743	14.6011	173	Promoter (<=1kb)	3	12844254	12850117	5864	2	NM_140349	0	CG10948	CG10948
chr2L	20416663	20416888	Filter_SAM_or_BAM__output_SAM_or_BAM_on_data_207__bam_peak_1919	144	.	2.9117	16.3548	14.4845	72	Promoter (<=1kb)	1	20415173	20416768	1596	2	NM_136188	0	CG10949	CG10949
chrX	8148619	8148826	Filter_SAM_or_BAM__output_SAM_or_BAM_on_data_207__bam_peak_10355	120	.	2.79101	13.811	12.0067	97	Promoter (<=1kb)	6	8148783	8150686	1904	1	NM_001272395	0	CG10959	CG10959
chrX	8974244	8974482	Filter_SAM_or_BAM__output_SAM_or_BAM_on_data_207__bam_peak_10431	323	.	5.0889	34.6015	32.3356	137	Promoter (<=1kb)	6	8972908	8974255	1348	2	NM_176714	0	CG10962	CG10962
chr3R	4337556	4337850	Filter_SAM_or_BAM__output_SAM_or_BAM_on_data_207__bam_peak_6744	291	.	3.09358	31.3343	29.1341	152	Promoter (<=1kb)	4	4337755	4339914	2160	1	NM_141199	0	CG1103	CG1103
chr2L	5724495	5724739	Filter_SAM_or_BAM__output_SAM_or_BAM_on_data_207__bam_peak_577	236	.	3.50121	25.7717	23.6864	114	Promoter (<=1kb)	1	5724656	5760047	35392	1	NM_135112	0	CG11030	CG11030
chr2R	20230800	20231089	Filter_SAM_or_BAM__output_SAM_or_BAM_on_data_207__bam_peak_3824	664	.	6.94724	69.4026	66.4317	170	Promoter (<=1kb)	2	20231829	20234927	3099	1	NM_137612	-740	CG11044	CG11044
chr3R	7067127	7067510	Filter_SAM_or_BAM__output_SAM_or_BAM_on_data_207__bam_peak_6985	113	.	2.23736	13.1051	11.3195	35	Promoter (<=1kb)	4	7064186	7067136	2951	2	NM_141431	0	CG1105	CG1105
chr2L	6610794	6611007	Filter_SAM_or_BAM__output_SAM_or_BAM_on_data_207__bam_peak_663	207	.	3.76938	22.7855	20.7647	35	Promoter (<=1kb)	1	6611011	6617117	6107	1	NM_135208	-4	CG11050	CG11050
chr2L	6612300	6612996	Filter_SAM_or_BAM__output_SAM_or_BAM_on_data_207__bam_peak_664	777	.	5.37339	81.0163	77.7873	183	Promoter (<=1kb)	1	6611687	6617117	5431	1	NM_164695	614	CG11050	CG11050
chr3R	8009202	8009467	Filter_SAM_or_BAM__output_SAM_or_BAM_on_data_207__bam_peak_7065	116	.	2.78676	13.4403	11.6459	90	Promoter (<=1kb)	4	8008249	8009239	991	2	NM_143924	0	CG11052	CG11052
chr2L	6658319	6658538	Filter_SAM_or_BAM__output_SAM_or_BAM_on_data_207__bam_peak_671	109	.	2.52675	12.7539	10.9782	167	Promoter (<=1kb)	1	6658517	6662033	3517	1	NM_135216	0	CG11070	CG11070
chr3R	24876863	24877096	Filter_SAM_or_BAM__output_SAM_or_BAM_on_data_207__bam_peak_8848	111	.	2.31411	12.9266	11.1463	132	Promoter (<=1kb)	4	24877045	24881478	4434	1	NM_143048	0	CG11089	CG11089
chrX	13811419	13811757	Filter_SAM_or_BAM__output_SAM_or_BAM_on_data_207__bam_peak_10864	185	.	3.62474	20.4994	18.5306	177	Promoter (<=1kb)	6	13811684	13812870	1187	1	NM_132699	0	CG11095	CG11095
chr2R	7440565	7440780	Filter_SAM_or_BAM__output_SAM_or_BAM_on_data_207__bam_peak_2296	123	.	2.79504	14.1817	12.3674	69	Promoter (<=1kb)	2	7440706	7442885	2180	1	NM_136432	0	CG11123	CG11123
chr3L	22868131	22868479	Filter_SAM_or_BAM__output_SAM_or_BAM_on_data_207__bam_peak_6669	109	.	2.20516	12.7259	10.9509	157	Promoter (<=1kb)	3	22867175	22868243	1069	2	NM_001316459	0	CG11137	CG11137
chr2R	7463017	7463281	Filter_SAM_or_BAM__output_SAM_or_BAM_on_data_207__bam_peak_2300	385	.	4.73401	40.9211	38.5292	101	Promoter (<=1kb)	2	7459685	7463139	3455	2	NM_001299230	0	CG11141	CG11141
chr2L	5720898	5721100	Filter_SAM_or_BAM__output_SAM_or_BAM_on_data_207__bam_peak_576	92	.	1.99414	10.9845	9.2594	175	Promoter (<=1kb)	1	5718121	5720899	2779	2	NM_001169419	0	CG11149	CG11149
chrX	13739502	13739713	Filter_SAM_or_BAM__output_SAM_or_BAM_on_data_207__bam_peak_10849	95	.	2.46245	11.2436	9.51126	139	Promoter (<=1kb)	6	13739744	13741101	1358	1	NM_132689	-31	CG11151	CG11151
chr3R	24918008	24918230	Filter_SAM_or_BAM__output_SAM_or_BAM_on_data_207__bam_peak_8849	67	.	2.07739	8.37884	6.73537	175	Promoter (<=1kb)	4	24918106	24922385	4280	1	NM_001170244	0	CG11168	CG11168
chrX	13605976	13606257	Filter_SAM_or_BAM__output_SAM_or_BAM_on_data_207__bam_peak_10835	277	.	3.99839	29.9627	27.7902	142	Promoter (<=1kb)	6	13606144	13609529	3386	1	NM_132673	0	CG11178	CG11178
chr2R	20623319	20623658	Filter_SAM_or_BAM__output_SAM_or_BAM_on_data_207__bam_peak_3850	284	.	3.37244	30.6036	28.4181	148	Promoter (<=1kb)	2	20620914	20623429	2516	2	NM_001299709	0	CG11180	CG11180
chr2R	8098517	8099116	Filter_SAM_or_BAM__output_SAM_or_BAM_on_data_207__bam_peak_2405	117	.	2.11234	13.583	11.7845	265	Promoter (<=1kb)	2	8098684	8102306	3623	1	NM_136507	0	CG11210	CG11210
chr3L	21728532	21729070	Filter_SAM_or_BAM__output_SAM_or_BAM_on_data_207__bam_peak_6585	191	.	3.60391	21.0907	19.1083	549	Promoter (<=1kb)	3	21724326	21728673	4348	2	NM_001104189	0	CG11247	CG11247
chr3L	13006536	13006916	Filter_SAM_or_BAM__output_SAM_or_BAM_on_data_207__bam_peak_5654	175	.	2.42912	19.5469	17.5998	162	Promoter (<=1kb)	3	13006817	13007881	1065	1	NM_001169964	0	CG11263	CG11263
chr3L	13015874	13016175	Filter_SAM_or_BAM__output_SAM_or_BAM_on_data_207__bam_peak_5657	209	.	3.16501	22.9461	20.9215	155	Promoter (<=1kb)	3	13016050	13016903	854	1	NM_140365	0	CG11267	CG11267
chr3R	4813247	4813501	Filter_SAM_or_BAM__output_SAM_or_BAM_on_data_207__bam_peak_6796	74	.	1.90373	9.13948	7.47077	137	Promoter (<=1kb)	4	4813335	4815812	2478	1	NM_169021	0	CG1129	CG1129
chr3L	21304378	21304882	Filter_SAM_or_BAM__output_SAM_or_BAM_on_data_207__bam_peak_6545	41	.	1.55706	5.73447	4.19033	413	Promoter (<=1kb)	3	21301785	21304467	2683	2	NM_001300212	0	CG11309	CG11309
chr3R	31462998	31463393	Filter_SAM_or_BAM__output_SAM_or_BAM_on_data_207__bam_peak_9443	716	.	6.27928	74.757	71.6714	197	Promoter (<=1kb)	4	31463301	31464134	834	1	NM_143612	0	CG11333	CG11333
chr3L	4541574	4542321	Filter_SAM_or_BAM__output_SAM_or_BAM_on_data_207__bam_peak_4867	529	.	3.74235	55.6518	52.9699	413	Promoter (<=1kb)	3	4542051	4553457	11407	1	NM_001259697	0	CG11357	CG11357
chr4	670918	671363	Filter_SAM_or_BAM__output_SAM_or_BAM_on_data_207__bam_peak_9547	173	.	2.34458	19.2628	17.3222	258	Promoter (<=1kb)	5	671142	687565	16424	1	NM_001272141	0	CG11360	CG11360
chr3L	22727745	22728334	Filter_SAM_or_BAM__output_SAM_or_BAM_on_data_207__bam_peak_6656	537	.	4.63931	56.4414	53.7435	330	Promoter (<=1kb)	3	22728111	22733446	5336	1	NM_141155	0	CG11367	CG11367
chr2L	102141	102474	Filter_SAM_or_BAM__output_SAM_or_BAM_on_data_207__bam_peak_14	274	.	3.05486	29.6031	27.438	165	Promoter (<=1kb)	1	102380	104142	1763	1	NM_001272861	0	CG11377	CG11377
chr3L	20788078	20788279	Filter_SAM_or_BAM__output_SAM_or_BAM_on_data_207__bam_peak_6481	87	.	2.24583	10.5035	8.79247	72	Promoter (<=1kb)	3	20786340	20788137	1798	2	NM_140998	0	CG11396	CG11396
chrX	1215048	1215296	Filter_SAM_or_BAM__output_SAM_or_BAM_on_data_207__bam_peak_9667	68	.	2.1861	8.46214	6.81515	139	Promoter (<=1kb)	6	1211989	1215156	3168	2	NM_001272193	0	CG11398	CG11398
chr3L	20785052	20785378	Filter_SAM_or_BAM__output_SAM_or_BAM_on_data_207__bam_peak_6479	341	.	3.9845	36.484	34.1806	514	Promoter (<=1kb)	3	20780350	20786197	5848	2	NM_140997	819	CG11399	CG11399
chr3L	20785618	20785709	Filter_SAM_or_BAM__output_SAM_or_BAM_on_data_207__bam_peak_6479	341	.	3.9845	36.484	34.1806	514	Promoter (<=1kb)	3	20780350	20786197	5848	2	NM_140997	488	CG11399	CG11399
chr3L	20786111	20786379	Filter_SAM_or_BAM__output_SAM_or_BAM_on_data_207__bam_peak_6480	80	.	2.18968	9.77356	8.08419	168	Promoter (<=1kb)	3	20780350	20786197	5848	2	NM_140997	0	CG11399	CG11399
chr2R	17133843	17134203	Filter_SAM_or_BAM__output_SAM_or_BAM_on_data_207__bam_peak_3497	216	.	3.34842	23.6572	21.6172	249	Promoter (<=1kb)	2	17134129	17134852	724	1	NM_137349	0	CG11400	CG11400
chr2R	24561462	24561784	Filter_SAM_or_BAM__output_SAM_or_BAM_on_data_207__bam_peak_4242	127	.	2.42733	14.5256	12.7023	175	Promoter (<=1kb)	2	24561607	24565058	3452	1	NM_138088	0	CG11414	CG11414
chr3R	7473706	7473901	Filter_SAM_or_BAM__output_SAM_or_BAM_on_data_207__bam_peak_7023	189	.	2.94768	20.8993	18.9213	147	Promoter (<=1kb)	4	7472458	7473781	1324	2	NM_176415	0	CG1142	CG1142
chrX	4554054	4554409	Filter_SAM_or_BAM__output_SAM_or_BAM_on_data_207__bam_peak_10000	574	.	5.07156	60.2508	57.4754	166	Promoter (<=1kb)	6	4553117	4554197	1081	2	NM_131943	0	CG11444	CG11444
chr2L	143019	143494	Filter_SAM_or_BAM__output_SAM_or_BAM_on_data_207__bam_peak_28	1078	.	4.78321	111.812	107.841	266	Promoter (<=1kb)	1	143323	144227	905	1	NM_134653	0	CG11454	CG11454
chr3L	2488504	2489026	Filter_SAM_or_BAM__output_SAM_or_BAM_on_data_207__bam_peak_4621	253	.	3.63166	27.4738	25.3528	442	Promoter (<=1kb)	3	2488804	2492613	3810	1	NM_167950	0	CG1146	CG1146
chr3L	2489844	2490263	Filter_SAM_or_BAM__output_SAM_or_BAM_on_data_207__bam_peak_4622	428	.	3.75731	45.3772	42.8961	166	Promoter (<=1kb)	3	2490220	2492613	2394	1	NM_139468	0	CG1146	CG1146
chr3L	3070573	3071157	Filter_SAM_or_BAM__output_SAM_or_BAM_on_data_207__bam_peak_4678	800	.	4.44645	83.3495	80.067	264	Promoter (<=1kb)	3	3071133	3088634	17502	1	NM_001104017	0	CG11486	CG11486
chr3L	3072323	3072671	Filter_SAM_or_BAM__output_SAM_or_BAM_on_data_207__bam_peak_4679	175	.	2.97954	19.5469	17.5998	120	Promoter (<=1kb)	3	3072547	3088634	16088	1	NM_001104018	0	CG11486	CG11486
chr3L	3077554	3078235	Filter_SAM_or_BAM__output_SAM_or_BAM_on_data_207__bam_peak_4680	363	.	3.51856	38.7317	36.3831	220	Promoter (<=1kb)	3	3077929	3088634	10706	1	NM_001104016	0	CG11486	CG11486
chr3L	3080969	3081567	Filter_SAM_or_BAM__output_SAM_or_BAM_on_data_207__bam_peak_4682	445	.	4.46931	47.0567	44.5422	496	Promoter (<=1kb)	3	3081568	3088493	6926	1	NM_167984	-1	CG11486	CG11486
chr3L	3081692	3081809	Filter_SAM_or_BAM__output_SAM_or_BAM_on_data_207__bam_peak_4683	155	.	2.81184	17.3978	15.5014	164	Promoter (<=1kb)	3	3081568	3088493	6926	1	NM_167984	125	CG11486	CG11486
chr3R	29997701	29998019	Filter_SAM_or_BAM__output_SAM_or_BAM_on_data_207__bam_peak_9293	183	.	2.8915	20.3041	18.3394	178	Promoter (<=1kb)	4	29997900	29999755	1856	1	NM_143501	0	CG11504	CG11504
chr3L	22266591	22266857	Filter_SAM_or_BAM__output_SAM_or_BAM_on_data_207__bam_peak_6625	143	.	2.75766	16.2129	14.3462	167	Promoter (<=1kb)	3	22265806	22266679	874	2	NM_141129	0	CG11523	CG11523
chr3L	3143352	3143557	Filter_SAM_or_BAM__output_SAM_or_BAM_on_data_207__bam_peak_4694	111	.	3.10024	12.9137	11.1339	105	Promoter (<=1kb)	3	3128832	3143457	14626	2	NM_139514	0	CG11537	CG11537
chr3R	31736853	31737149	Filter_SAM_or_BAM__output_SAM_or_BAM_on_data_207__bam_peak_9470	280	.	3.97031	30.2733	28.0947	111	Promoter (<=1kb)	4	31737035	31737999	965	1	NM_143627	0	CG11563	CG11563
chr3L	4282694	4282977	Filter_SAM_or_BAM__output_SAM_or_BAM_on_data_207__bam_peak_4848	112	.	2.51339	13.0614	11.2769	89	Promoter (<=1kb)	3	4281504	4282817	1314	2	NM_001038900	0	CG11583	CG11583
chr3L	4262395	4262628	Filter_SAM_or_BAM__output_SAM_or_BAM_on_data_207__bam_peak_4845	38	.	1.78478	5.33531	3.80739	69	Promoter (<=1kb)	3	4261297	4262470	1174	2	NM_139624	0	CG11586	CG11586
chr3L	4040198	4040544	Filter_SAM_or_BAM__output_SAM_or_BAM_on_data_207__bam_peak_4813	164	.	3.05728	18.3387	16.4198	319	Promoter (<=1kb)	3	4037523	4040291	2769	2	NM_001274463	0	CG11593	CG11593
chrX	1927479	1927712	Filter_SAM_or_BAM__output_SAM_or_BAM_on_data_207__bam_peak_9737	197	.	2.57171	21.7931	19.7946	161	Promoter (<=1kb)	6	1927683	1930510	2828	1	NM_001272226	0	CG11596	CG11596
chr3L	11822009	11822369	Filter_SAM_or_BAM__output_SAM_or_BAM_on_data_207__bam_peak_5561	385	.	3.94324	40.9639	38.5708	98	Promoter (<=1kb)	3	11820338	11822205	1868	2	NM_001043137	0	CG11597	CG11597
chr2L	283172	283528	Filter_SAM_or_BAM__output_SAM_or_BAM_on_data_207__bam_peak_52	305	.	3.20929	32.7953	30.5655	181	Promoter (<=1kb)	1	281670	283195	1526	2	NM_001298617	0	CG11601	CG11601
chr3R	12638038	12638490	Filter_SAM_or_BAM__output_SAM_or_BAM_on_data_207__bam_peak_7562	410	.	4.75651	43.4673	41.0246	167	Promoter (<=1kb)	4	12638481	12640033	1553	1	NM_141961	0	CG11608	CG11608
chr3R	5354904	5355164	Filter_SAM_or_BAM__output_SAM_or_BAM_on_data_207__bam_peak_6851	164	.	2.96819	18.3183	16.4002	180	Promoter (<=1kb)	4	5355092	5356748	1657	1	NM_001014606	0	CG1161	CG1161
chr2L	207253	207543	Filter_SAM_or_BAM__output_SAM_or_BAM_on_data_207__bam_peak_40	272	.	3.21992	29.3791	27.2183	165	Promoter (<=1kb)	1	204743	207297	2555	2	NM_134658	0	CG11617	CG11617
chr2L	21899052	21899828	Filter_SAM_or_BAM__output_SAM_or_BAM_on_data_207__bam_peak_2057	1359	.	8.34692	140.693	135.991	225	Promoter (<=1kb)	1	21896666	21898289	1624	2	NM_136281	-764	CG11629	CG11629
chrX	1026569	1026901	Filter_SAM_or_BAM__output_SAM_or_BAM_on_data_207__bam_peak_9654	241	.	3.84579	26.2526	24.1567	164	Promoter (<=1kb)	6	1013984	1026703	12720	2	NM_130523	0	CG11638	CG11638
chr3L	11707884	11708316	Filter_SAM_or_BAM__output_SAM_or_BAM_on_data_207__bam_peak_5552	154	.	2.76909	17.3204	15.4258	159	Promoter (<=1kb)	3	11700091	11707755	7665	2	NM_206339	-130	CG11658	CG11658
chr3R	13260115	13260596	Filter_SAM_or_BAM__output_SAM_or_BAM_on_data_207__bam_peak_7612	273	.	4.00547	29.4661	27.3039	248	Promoter (<=1kb)	4	13260356	13262227	1872	1	NM_001275602	0	CG11686	CG11686
chrX	6283520	6283740	Filter_SAM_or_BAM__output_SAM_or_BAM_on_data_207__bam_peak_10158	22	.	1.71062	3.70049	2.25091	186	Promoter (<=1kb)	6	6282037	6283575	1539	2	NM_132078	0	CG11700	CG11700
chr3R	5393722	5394016	Filter_SAM_or_BAM__output_SAM_or_BAM_on_data_207__bam_peak_6860	298	.	3.49858	32.102	29.8865	162	Promoter (<=1kb)	4	5393922	5397188	3267	1	NM_141277	0	CG1172	CG1172
chr3R	10045478	10045724	Filter_SAM_or_BAM__output_SAM_or_BAM_on_data_207__bam_peak_7318	104	.	2.70226	12.1653	10.4061	147	Promoter (<=1kb)	4	10044596	10045542	947	2	NM_141713	0	CG11722	CG11722
chr3R	8517656	8517958	Filter_SAM_or_BAM__output_SAM_or_BAM_on_data_207__bam_peak_7127	134	.	2.16548	15.2581	13.4159	169	Promoter (<=1kb)	4	8517868	8521378	3511	1	NM_141546	0	CG11737	CG11737
chr3R	8652708	8652959	Filter_SAM_or_BAM__output_SAM_or_BAM_on_data_207__bam_peak_7134	53	.	1.74707	6.98499	5.39101	90	Promoter (<=1kb)	4	8652821	8653847	1027	1	NM_001275448	0	CG11753	CG11753
chr3R	8676479	8676928	Filter_SAM_or_BAM__output_SAM_or_BAM_on_data_207__bam_peak_7142	233	.	3.04826	25.4422	23.3635	135	Promoter (<=1kb)	4	8676915	8678955	2041	1	NM_001275452	0	CG11755	CG11755
chr2R	10468415	10468676	Filter_SAM_or_BAM__output_SAM_or_BAM_on_data_207__bam_peak_2687	286	.	4.16909	30.8196	28.63	161	Promoter (<=1kb)	2	10468616	10469643	1028	1	NM_165776	0	CG11777	CG11777
chr3R	25025000	25025306	Filter_SAM_or_BAM__output_SAM_or_BAM_on_data_207__bam_peak_8854	210	.	3.03026	23.1104	21.0826	174	Promoter (<=1kb)	4	25024473	25025017	545	2	NM_143063	0	CG11781	CG11781
chr3R	25049908	25050509	Filter_SAM_or_BAM__output_SAM_or_BAM_on_data_207__bam_peak_8857	661	.	4.47392	69.1259	66.1613	180	Promoter (<=1kb)	4	25050243	25053074	2832	1	NM_001104437	0	CG11791	CG11791
chrX	11872694	11872922	Filter_SAM_or_BAM__output_SAM_or_BAM_on_data_207__bam_peak_10676	198	.	4.17747	21.8197	19.821	124	Promoter (<=1kb)	6	11871299	11872779	1481	2	NM_132531	0	CG11802	CG11802
chr2R	15216028	15216286	Filter_SAM_or_BAM__output_SAM_or_BAM_on_data_207__bam_peak_3265	174	.	2.58157	19.4328	17.4882	163	Promoter (<=1kb)	2	15216207	15217070	864	1	NM_137177	0	CG11808	CG11808
chr3L	1971093	1971605	Filter_SAM_or_BAM__output_SAM_or_BAM_on_data_207__bam_peak_4579	715	.	4.7157	74.6734	71.5891	184	Promoter (<=1kb)	3	1970191	1971200	1010	2	NM_139428	0	CG11815	CG11815
chr2R	10421076	10422118	Filter_SAM_or_BAM__output_SAM_or_BAM_on_data_207__bam_peak_2678	450	.	3.35862	47.5607	45.0367	730	Promoter (<=1kb)	2	10420414	10421908	1495	2	NM_001273937	0	CG11825	CG11825
chr2R	10423104	10423529	Filter_SAM_or_BAM__output_SAM_or_BAM_on_data_207__bam_peak_2679	806	.	5.92593	83.9375	80.6413	277	Promoter (<=1kb)	2	10420414	10423650	3237	2	NM_001273936	121	CG11825	CG11825
chr3R	28922790	28923071	Filter_SAM_or_BAM__output_SAM_or_BAM_on_data_207__bam_peak_9180	324	.	3.75167	34.7579	32.4886	175	Promoter (<=1kb)	4	28923044	28925086	2043	1	NM_143391	0	CG11828	CG11828
chr3R	29049370	29049613	Filter_SAM_or_BAM__output_SAM_or_BAM_on_data_207__bam_peak_9188	105	.	2.05088	12.2634	10.5021	153	Promoter (<=1kb)	4	29049493	29050721	1229	1	NM_143403	0	CG11837	CG11837
chr3R	25258696	25259068	Filter_SAM_or_BAM__output_SAM_or_BAM_on_data_207__bam_peak_8876	182	.	2.60802	20.2242	18.2612	220	Promoter (<=1kb)	4	25258898	25260759	1862	1	NM_001316488	0	CG11857	CG11857
chr3R	29062858	29063542	Filter_SAM_or_BAM__output_SAM_or_BAM_on_data_207__bam_peak_9189	453	.	3.75301	47.8836	45.353	180	Promoter (<=1kb)	4	29063040	29106821	43782	1	NM_143409	0	CG11873	CG11873
chr3R	29063597	29064077	Filter_SAM_or_BAM__output_SAM_or_BAM_on_data_207__bam_peak_9190	299	.	3.30687	32.2091	29.9911	335	Promoter (<=1kb)	4	29063828	29108948	45121	1	NM_001276124	0	CG11873	CG11873
chr3R	29064148	29064312	Filter_SAM_or_BAM__output_SAM_or_BAM_on_data_207__bam_peak_9191	192	.	2.77969	21.2835	19.2965	132	Promoter (<=1kb)	4	29063828	29108948	45121	1	NM_001276124	321	CG11873	CG11873
chr3R	29148113	29148462	Filter_SAM_or_BAM__output_SAM_or_BAM_on_data_207__bam_peak_9204	147	.	3.22948	16.6157	14.7386	243	Promoter (<=1kb)	4	29147016	29148172	1157	2	NM_143419	0	CG11882	CG11882
chr2R	10617382	10617799	Filter_SAM_or_BAM__output_SAM_or_BAM_on_data_207__bam_peak_2720	374	.	3.74206	39.7755	37.406	318	Promoter (<=1kb)	2	10617662	10640990	23329	1	NM_136754	0	CG11883	CG11883
chr2R	10618344	10618668	Filter_SAM_or_BAM__output_SAM_or_BAM_on_data_207__bam_peak_2721	375	.	3.3944	39.8961	37.5243	205	Promoter (<=1kb)	2	10617662	10641807	24146	1	NM_001299360	683	CG11883	CG11883
chr2L	421280	421736	Filter_SAM_or_BAM__output_SAM_or_BAM_on_data_207__bam_peak_63	264	.	2.80421	28.5437	26.4002	161	Promoter (<=1kb)	1	420895	421450	556	2	NM_134678	0	CG11885	CG11885
chr3R	29200052	29200544	Filter_SAM_or_BAM__output_SAM_or_BAM_on_data_207__bam_peak_9209	42	.	2.17289	5.81969	4.27061	156	Promoter (<=1kb)	4	29200454	29201770	1317	1	NM_143789	0	CG11899	CG11899
chr2R	19283874	19284228	Filter_SAM_or_BAM__output_SAM_or_BAM_on_data_207__bam_peak_3739	163	.	2.4527	18.2897	16.372	115	Promoter (<=1kb)	2	19281418	19283961	2544	2	NM_137558	0	CG11906	CG11906
chr3R	25074691	25074927	Filter_SAM_or_BAM__output_SAM_or_BAM_on_data_207__bam_peak_8863	65	.	2.14747	8.16357	6.52654	109	Promoter (<=1kb)	4	25074877	25076382	1506	1	NM_143078	0	CG11920	CG11920
chr2L	4847599	4847863	Filter_SAM_or_BAM__output_SAM_or_BAM_on_data_207__bam_peak_490	52	.	1.99175	6.86613	5.27555	158	Promoter (<=1kb)	1	4847766	4849499	1734	1	NM_135023	0	CG11927	CG11927
chr2R	19357312	19357693	Filter_SAM_or_BAM__output_SAM_or_BAM_on_data_207__bam_peak_3751	525	.	5.32207	55.2086	52.5349	110	Promoter (<=1kb)	2	19357532	19362373	4842	1	NM_137569	0	CG11961	CG11961
chr2R	19358091	19358323	Filter_SAM_or_BAM__output_SAM_or_BAM_on_data_207__bam_peak_3752	277	.	3.47304	29.9372	27.7652	150	Promoter (<=1kb)	2	19358316	19362373	4058	1	NM_166342	0	CG11961	CG11961
chr3R	8944903	8945156	Filter_SAM_or_BAM__output_SAM_or_BAM_on_data_207__bam_peak_7164	426	.	4.61743	45.1041	42.629	137	Promoter (<=1kb)	4	8942954	8945020	2067	2	NM_141590	0	CG11964	CG11964
chr3R	8984646	8984959	Filter_SAM_or_BAM__output_SAM_or_BAM_on_data_207__bam_peak_7169	61	.	1.94873	7.74741	6.12501	135	Promoter (<=1kb)	4	8984718	8990649	5932	1	NM_001300314	0	CG11970	CG11970
chr3R	9003884	9004105	Filter_SAM_or_BAM__output_SAM_or_BAM_on_data_207__bam_peak_7171	178	.	2.50413	19.821	17.8676	102	Promoter (<=1kb)	4	9004017	9005331	1315	1	NM_141600	0	CG11980	CG11980
chr3R	9008270	9008615	Filter_SAM_or_BAM__output_SAM_or_BAM_on_data_207__bam_peak_7173	317	.	2.98195	33.9959	31.7425	213	Promoter (<=1kb)	4	9008321	9010274	1954	1	NM_141603	0	CG11983	CG11983
chr3R	9015228	9015566	Filter_SAM_or_BAM__output_SAM_or_BAM_on_data_207__bam_peak_7176	212	.	2.36293	23.2802	21.2483	157	Promoter (<=1kb)	4	9015446	9016822	1377	1	NM_141605	0	CG11986	CG11986
chr3L	1569019	1569269	Filter_SAM_or_BAM__output_SAM_or_BAM_on_data_207__bam_peak_4525	147	.	3.14972	16.6732	14.7948	67	Promoter (<=1kb)	3	1569181	1574732	5552	1	NM_139370	0	CG12004	CG12004
chr3R	5126919	5127278	Filter_SAM_or_BAM__output_SAM_or_BAM_on_data_207__bam_peak_6820	1244	.	6.73707	128.827	124.442	179	Promoter (<=1kb)	4	5128087	5129939	1853	1	NM_141255	-809	CG12007	CG12007
chr3R	5127903	5128175	Filter_SAM_or_BAM__output_SAM_or_BAM_on_data_207__bam_peak_6821	148	.	2.47487	16.6802	14.8014	151	Promoter (<=1kb)	4	5128087	5129939	1853	1	NM_141255	0	CG12007	CG12007
chr3L	3374063	3374303	Filter_SAM_or_BAM__output_SAM_or_BAM_on_data_207__bam_peak_4737	179	.	3.37771	19.8809	17.9258	90	Promoter (<=1kb)	3	3374282	3376649	2368	1	NM_168030	0	CG12010	CG12010
chr3L	1856867	1857312	Filter_SAM_or_BAM__output_SAM_or_BAM_on_data_207__bam_peak_4561	130	.	2.30833	14.888	13.055	291	Promoter (<=1kb)	3	1857165	1859047	1883	1	NM_001202093	0	CG12024	CG12024
chr3L	1865159	1865542	Filter_SAM_or_BAM__output_SAM_or_BAM_on_data_207__bam_peak_4564	127	.	2.68294	14.5661	12.7418	90	Promoter (<=1kb)	3	1865430	1867863	2434	1	NM_139414	0	CG12025	CG12025
chr3R	31220448	31221659	Filter_SAM_or_BAM__output_SAM_or_BAM_on_data_207__bam_peak_9425	323	.	3.88731	34.6473	32.3803	141	Promoter (<=1kb)	4	31220702	31228491	7790	1	NM_143596	0	CG12054	CG12054
chr3R	31223988	31224296	Filter_SAM_or_BAM__output_SAM_or_BAM_on_data_207__bam_peak_9427	691	.	4.64213	72.1718	69.1417	537	Promoter (<=1kb)	4	31224917	31229387	4471	1	NM_170545	-621	CG12054	CG12054
chrX	9192487	9192719	Filter_SAM_or_BAM__output_SAM_or_BAM_on_data_207__bam_peak_10454	51	.	2.56325	6.74651	5.16087	135	Promoter (<=1kb)	6	9192669	9193620	952	1	NM_132307	0	CG12056	CG12056
chrX	8573968	8574360	Filter_SAM_or_BAM__output_SAM_or_BAM_on_data_207__bam_peak_10395	92	.	3.11605	10.9868	9.26153	83	Promoter (<=1kb)	6	8574306	8588528	14223	1	NM_001169237	0	CG12065	CG12065
chrX	8574470	8574563	Filter_SAM_or_BAM__output_SAM_or_BAM_on_data_207__bam_peak_10396	361	.	5.08609	38.5325	36.1883	438	Promoter (<=1kb)	6	8574306	8588528	14223	1	NM_206662	165	CG12065	CG12065
chrX	8837872	8838286	Filter_SAM_or_BAM__output_SAM_or_BAM_on_data_207__bam_peak_10417	745	.	7.03123	77.6702	74.5179	189	Promoter (<=1kb)	6	8838323	8872774	34452	1	NM_001258653	-37	CG12075	CG12075
chr3L	1496557	1496825	Filter_SAM_or_BAM__output_SAM_or_BAM_on_data_207__bam_peak_4514	156	.	2.63995	17.5732	15.6725	171	Promoter (<=1kb)	3	1490951	1496643	5693	2	NM_001274328	0	CG12084	CG12084
chr3L	1536821	1537275	Filter_SAM_or_BAM__output_SAM_or_BAM_on_data_207__bam_peak_4519	57	.	2.04795	7.39042	5.78163	304	Promoter (<=1kb)	3	1534929	1536835	1907	2	NM_001274332	0	CG12091	CG12091
chr3L	2773946	2774069	Filter_SAM_or_BAM__output_SAM_or_BAM_on_data_207__bam_peak_4656	64	.	2.09687	8.06238	6.42963	104	Promoter (<=1kb)	3	2772560	2774007	1448	2	NM_139490	0	CG12093	CG12093
chr3L	1558270	1558761	Filter_SAM_or_BAM__output_SAM_or_BAM_on_data_207__bam_peak_4524	128	.	2.75716	14.715	12.887	373	Promoter (<=1kb)	3	1555363	1558484	3122	2	NM_139366	0	CG12099	CG12099
chr3L	1602131	1602191	Filter_SAM_or_BAM__output_SAM_or_BAM_on_data_207__bam_peak_4532	187	.	3.29279	20.7474	18.7727	116	Promoter (<=1kb)	3	1600942	1602034	1093	2	NM_001299971	-98	CG12104	CG12104
chr3L	1602561	1602838	Filter_SAM_or_BAM__output_SAM_or_BAM_on_data_207__bam_peak_4533	118	.	2.86297	13.6495	11.8491	126	Promoter (<=1kb)	3	1600726	1602674	1949	2	NM_001274338	0	CG12104	CG12104
chr2R	7674219	7674560	Filter_SAM_or_BAM__output_SAM_or_BAM_on_data_207__bam_peak_2334	479	.	3.87236	50.5172	47.9342	169	Promoter (<=1kb)	2	7674450	7675362	913	1	NM_136470	0	CG12107	CG12107
chrX	8559982	8560974	Filter_SAM_or_BAM__output_SAM_or_BAM_on_data_207__bam_peak_10391	494	.	4.65443	52.038	49.4259	194	Promoter (<=1kb)	6	8558879	8560186	1308	2	NM_001272409	0	CG12112	CG12112
chrX	9196353	9196562	Filter_SAM_or_BAM__output_SAM_or_BAM_on_data_207__bam_peak_10455	91	.	2.74891	10.8391	9.11778	72	Promoter (<=1kb)	6	9194750	9196414	1665	2	NM_132309	0	CG12118	CG12118
chrX	9232285	9232561	Filter_SAM_or_BAM__output_SAM_or_BAM_on_data_207__bam_peak_10459	169	.	3.56975	18.9057	16.9735	163	Promoter (<=1kb)	6	9228796	9232378	3583	2	NM_132317	0	CG12121	CG12121
chrX	8442209	8442443	Filter_SAM_or_BAM__output_SAM_or_BAM_on_data_207__bam_peak_10378	109	.	3.38172	12.6846	10.9107	132	Promoter (<=1kb)	6	8441247	8442348	1102	2	NM_132250	0	CG12123	CG12123
chr2R	10026649	10026944	Filter_SAM_or_BAM__output_SAM_or_BAM_on_data_207__bam_peak_2628	252	.	2.99165	27.3904	25.2709	171	Promoter (<=1kb)	2	10026839	10028498	1660	1	NM_136699	0	CG12128	CG12128
chr2R	7916358	7916828	Filter_SAM_or_BAM__output_SAM_or_BAM_on_data_207__bam_peak_2381	111	.	2.13157	12.9548	11.1738	167	Promoter (<=1kb)	2	7915027	7916478	1452	2	NM_206054	0	CG12159	CG12159
chr3R	5251584	5251964	Filter_SAM_or_BAM__output_SAM_or_BAM_on_data_207__bam_peak_6834	256	.	3.24825	27.8217	25.6932	279	Promoter (<=1kb)	4	5237651	5251745	14095	2	NM_141264	0	CG12163	CG12163
chr3R	5633433	5633727	Filter_SAM_or_BAM__output_SAM_or_BAM_on_data_207__bam_peak_6885	670	.	5.43017	69.9844	67.0013	161	Promoter (<=1kb)	4	5633627	5634640	1014	1	NM_141306	0	CG12171	CG12171
chr3R	5256587	5257239	Filter_SAM_or_BAM__output_SAM_or_BAM_on_data_207__bam_peak_6835	58	.	1.94792	7.41746	5.8069	523	Promoter (<=1kb)	4	5255444	5256681	1238	2	NM_141266	0	CG12173	CG12173
chr3R	5791441	5791809	Filter_SAM_or_BAM__output_SAM_or_BAM_on_data_207__bam_peak_6905	186	.	2.436	20.5737	18.6028	205	Promoter (<=1kb)	4	5791879	5793383	1505	1	NM_141332	-70	CG1218	CG1218
chrX	6301245	6301468	Filter_SAM_or_BAM__output_SAM_or_BAM_on_data_207__bam_peak_10160	84	.	3.0759	10.1994	8.49734	137	Promoter (<=1kb)	6	6299054	6301285	2232	2	NM_132084	0	CG12219	CG12219
chr3R	11982552	11982894	Filter_SAM_or_BAM__output_SAM_or_BAM_on_data_207__bam_peak_7504	598	.	3.62813	62.6573	59.8316	185	Promoter (<=1kb)	4	11980704	11982622	1919	2	NM_001275563	0	CG12224	CG12224
chrX	5907862	5908219	Filter_SAM_or_BAM__output_SAM_or_BAM_on_data_207__bam_peak_10127	354	.	3.43486	37.7726	35.4432	188	Promoter (<=1kb)	6	5908135	5911789	3655	1	NM_132049	0	CG12236	CG12236
chr3R	26230066	26230491	Filter_SAM_or_BAM__output_SAM_or_BAM_on_data_207__bam_peak_8972	828	.	5.31974	86.2471	82.8954	678	Promoter (<=1kb)	4	26230248	26233329	3082	1	NM_143213	0	CG12290	CG12290
chr3L	15580536	15580810	Filter_SAM_or_BAM__output_SAM_or_BAM_on_data_207__bam_peak_5863	238	.	3.87266	25.932	23.8433	159	Promoter (<=1kb)	3	15580800	15583373	2574	1	NM_140524	0	CG12301	CG12301
chr3L	15137230	15137466	Filter_SAM_or_BAM__output_SAM_or_BAM_on_data_207__bam_peak_5824	112	.	2.78227	13.0693	11.2845	69	Promoter (<=1kb)	3	15131508	15136934	5427	2	NM_140495	-297	CG12316	CG12316
chr3L	361265	361592	Filter_SAM_or_BAM__output_SAM_or_BAM_on_data_207__bam_peak_4371	281	.	4.06958	30.2843	28.1055	148	Promoter (<=1kb)	3	361472	365681	4210	1	NM_138190	0	CG1233	CG1233
chr2R	10813284	10813599	Filter_SAM_or_BAM__output_SAM_or_BAM_on_data_207__bam_peak_2733	53	.	1.85067	6.90208	5.31041	34	Promoter (<=1kb)	2	10812157	10813310	1154	2	NM_136768	0	CG12341	CG12341
chr2L	8126866	8127081	Filter_SAM_or_BAM__output_SAM_or_BAM_on_data_207__bam_peak_850	89	.	1.95347	10.7007	8.98387	37	Promoter (<=1kb)	1	8125668	8126890	1223	2	NM_135339	0	CG12375	CG12375
chr2R	11359131	11359338	Filter_SAM_or_BAM__output_SAM_or_BAM_on_data_207__bam_peak_2803	110	.	2.28719	12.8717	11.0932	92	Promoter (<=1kb)	2	11357902	11359176	1275	2	NM_136832	0	CG12384	CG12384
chr3R	5733154	5733641	Filter_SAM_or_BAM__output_SAM_or_BAM_on_data_207__bam_peak_6898	496	.	4.40765	52.252	49.6364	108	Promoter (<=1kb)	4	5733513	5734702	1190	1	NM_001300256	0	CG1239	CG1239
chr2R	11149993	11150232	Filter_SAM_or_BAM__output_SAM_or_BAM_on_data_207__bam_peak_2768	87	.	2.1786	10.4124	8.70382	106	Promoter (<=1kb)	2	11147602	11150068	2467	2	NM_136795	0	CG12391	CG12391
chr2L	6047786	6048074	Filter_SAM_or_BAM__output_SAM_or_BAM_on_data_207__bam_peak_613	131	.	3.2076	14.9952	13.1599	109	Promoter (<=1kb)	1	6048002	6050438	2437	1	NM_164678	0	CG12393	CG12393
chrX	16062797	16063781	Filter_SAM_or_BAM__output_SAM_or_BAM_on_data_207__bam_peak_11033	1714	.	8.25304	177.047	171.491	392	Promoter (<=1kb)	6	16061902	16062898	997	2	NM_132873	0	CG12395	CG12395
chr3R	14108333	14108866	Filter_SAM_or_BAM__output_SAM_or_BAM_on_data_207__bam_peak_7692	1408	.	7.28085	145.722	140.869	314	Promoter (<=1kb)	4	14104488	14108321	3834	2	NM_142078	-13	CG12402	CG12402
chr3R	22446575	22446825	Filter_SAM_or_BAM__output_SAM_or_BAM_on_data_207__bam_peak_8549	104	.	2.50675	12.1591	10.4001	83	Promoter (<=1kb)	4	22440152	22446587	6436	2	NM_142787	0	CG12499	CG12499
chr2L	5341141	5341411	Filter_SAM_or_BAM__output_SAM_or_BAM_on_data_207__bam_peak_560	145	.	2.24862	16.3854	14.5144	49	Promoter (<=1kb)	1	5339132	5342234	3103	2	NM_135080	823	CG12512	CG12512
chr3L	12902733	12902959	Filter_SAM_or_BAM__output_SAM_or_BAM_on_data_207__bam_peak_5651	225	.	4.06391	24.5689	22.5093	156	Promoter (<=1kb)	3	12901247	12902737	1491	2	NM_001104126	0	CG12520	CG12520
chr3L	15832257	15832528	Filter_SAM_or_BAM__output_SAM_or_BAM_on_data_207__bam_peak_5895	137	.	2.89109	15.6443	13.7923	123	Promoter (<=1kb)	3	15832464	15833947	1484	1	NM_140549	0	CG12713	CG12713
chrX	12763533	12763781	Filter_SAM_or_BAM__output_SAM_or_BAM_on_data_207__bam_peak_10762	76	.	2.71794	9.3471	7.6725	71	Promoter (<=1kb)	6	12760642	12763611	2970	2	NM_001298238	0	CG12717	CG12717
chrX	5941894	5942154	Filter_SAM_or_BAM__output_SAM_or_BAM_on_data_207__bam_peak_10133	46	.	2.22463	6.19683	4.6325	153	Promoter (<=1kb)	6	5942606	5944622	2017	1	NM_132052	-452	CG12728	CG12728
chrX	5517060	5517373	Filter_SAM_or_BAM__output_SAM_or_BAM_on_data_207__bam_peak_10069	874	.	5.66436	90.9592	87.4953	199	Promoter (<=1kb)	6	5517259	5518771	1513	1	NM_132000	0	CG12730	CG12730
chr2R	9875019	9875440	Filter_SAM_or_BAM__output_SAM_or_BAM_on_data_207__bam_peak_2610	358	.	2.80277	38.173	35.8358	248	Promoter (<=1kb)	2	9875281	9876242	962	1	NM_165717	0	CG12744	CG12744
chr3R	5564765	5565211	Filter_SAM_or_BAM__output_SAM_or_BAM_on_data_207__bam_peak_6873	212	.	3.21526	23.2408	21.2102	284	Promoter (<=1kb)	4	5564865	5567435	2571	1	NM_169067	0	CG12746	CG12746
chrX	8676603	8677142	Filter_SAM_or_BAM__output_SAM_or_BAM_on_data_207__bam_peak_10405	908	.	10.3995	94.3671	90.8226	371	Promoter (<=1kb)	6	8677063	8680702	3640	1	NM_132268	0	CG12772	CG12772
chr2R	7791245	7791632	Filter_SAM_or_BAM__output_SAM_or_BAM_on_data_207__bam_peak_2364	133	.	2.09042	15.1786	13.3386	196	Promoter (<=1kb)	2	7790368	7791170	803	1	NM_136479	878	CG12824	CG12824
chr2R	24763013	24763247	Filter_SAM_or_BAM__output_SAM_or_BAM_on_data_207__bam_peak_4267	349	.	3.23995	37.2488	34.9297	138	Promoter (<=1kb)	2	24762566	24763094	529	2	NM_001274242	0	CG12848	CG12848
chr2R	14621311	14621754	Filter_SAM_or_BAM__output_SAM_or_BAM_on_data_207__bam_peak_3219	470	.	4.49763	49.5862	47.0217	334	Promoter (<=1kb)	2	14619798	14621320	1523	2	NM_137129	0	CG12863	CG12863
chr2R	10437245	10437568	Filter_SAM_or_BAM__output_SAM_or_BAM_on_data_207__bam_peak_2684	700	.	5.50048	73.1322	70.0814	148	Promoter (<=1kb)	2	10436598	10437382	785	2	NM_001273939	0	CG12895	CG12895
chr2R	10428145	10429260	Filter_SAM_or_BAM__output_SAM_or_BAM_on_data_207__bam_peak_2681	553	.	3.38143	58.0796	55.3486	1174	Promoter (<=1kb)	2	10426880	10427915	1036	2	NM_136740	-231	CG12896	CG12896
chr3R	9747363	9747893	Filter_SAM_or_BAM__output_SAM_or_BAM_on_data_207__bam_peak_7284	50	.	1.82782	6.6192	5.03868	397	Promoter (<=1kb)	4	9746167	9747506	1340	2	NM_141679	0	CG12948	CG12948
chr3L	21285609	21286222	Filter_SAM_or_BAM__output_SAM_or_BAM_on_data_207__bam_peak_6543	194	.	3.58366	21.4313	19.4409	515	Promoter (<=1kb)	3	21282014	21285962	3949	2	NM_141039	0	CG12974	CG12974
chr3L	21216775	21217033	Filter_SAM_or_BAM__output_SAM_or_BAM_on_data_207__bam_peak_6529	178	.	2.68803	19.8467	17.8924	171	Promoter (<=1kb)	3	21215995	21216839	845	2	NM_141036	0	CG12975	CG12975
chrX	17820284	17820776	Filter_SAM_or_BAM__output_SAM_or_BAM_on_data_207__bam_peak_11226	191	.	2.48826	21.1105	19.1276	195	Promoter (<=1kb)	6	17819155	17819685	531	2	NM_133015	-600	CG12986	CG12986
chrX	17579583	17579964	Filter_SAM_or_BAM__output_SAM_or_BAM_on_data_207__bam_peak_11193	29	.	2.04651	4.42233	2.93558	123	Promoter (<=1kb)	6	17579861	17598955	19095	1	NM_132995	0	CG12991	CG12991
chrX	16942797	16943025	Filter_SAM_or_BAM__output_SAM_or_BAM_on_data_207__bam_peak_11140	84	.	2.86648	10.1244	8.42473	72	Promoter (<=1kb)	6	16941086	16942871	1786	2	NM_132953	0	CG13001	CG13001
chrX	16803258	16803772	Filter_SAM_or_BAM__output_SAM_or_BAM_on_data_207__bam_peak_11126	160	.	2.85472	17.9828	16.072	326	Promoter (<=1kb)	6	16803650	16805754	2105	1	NM_132940	0	CG13005	CG13005
chr3L	16779683	16779943	Filter_SAM_or_BAM__output_SAM_or_BAM_on_data_207__bam_peak_6011	94	.	2.25714	11.177	9.44623	93	Promoter (<=1kb)	3	16776531	16779736	3206	2	NM_140662	0	CG13025	CG13025
chr3L	16291811	16292016	Filter_SAM_or_BAM__output_SAM_or_BAM_on_data_207__bam_peak_5946	95	.	3.22237	11.2795	9.5461	150	Promoter (<=1kb)	3	16289712	16290950	1239	2	NM_140607	-862	CG13045	CG13045
chr3R	6657350	6657579	Filter_SAM_or_BAM__output_SAM_or_BAM_on_data_207__bam_peak_6962	71	.	2.44959	8.84669	7.18717	141	Promoter (<=1kb)	4	6656030	6657442	1413	2	NM_001300273	0	CG1307	CG1307
chr2L	19565266	19565551	Filter_SAM_or_BAM__output_SAM_or_BAM_on_data_207__bam_peak_1856	130	.	2.13458	14.8952	13.0619	118	Promoter (<=1kb)	1	19565863	19567359	1497	1	NM_136146	-312	CG13077	CG13077
chr2L	8488862	8489072	Filter_SAM_or_BAM__output_SAM_or_BAM_on_data_207__bam_peak_915	108	.	2.08237	12.5952	10.824	61	Promoter (<=1kb)	1	8488981	8490546	1566	1	NM_135390	0	CG13088	CG13088
chr3L	4259158	4259512	Filter_SAM_or_BAM__output_SAM_or_BAM_on_data_207__bam_peak_4844	62	.	2.38414	7.9232	6.29495	214	Promoter (<=1kb)	3	4259430	4261643	2214	1	NM_139623	0	CG1309	CG1309
chr2L	8511736	8512156	Filter_SAM_or_BAM__output_SAM_or_BAM_on_data_207__bam_peak_916	203	.	2.46389	22.357	20.3461	249	Promoter (<=1kb)	1	8509069	8511866	2798	2	NM_001298828	0	CG13096	CG13096
chr2L	9735821	9736329	Filter_SAM_or_BAM__output_SAM_or_BAM_on_data_207__bam_peak_1048	628	.	3.84882	65.777	62.8848	183	Promoter (<=1kb)	1	9736645	9737329	685	1	NM_135463	-316	CG13117	CG13117
chr2L	9736391	9736765	Filter_SAM_or_BAM__output_SAM_or_BAM_on_data_207__bam_peak_1049	286	.	3.40731	30.7939	28.6046	196	Promoter (<=1kb)	1	9736645	9737329	685	1	NM_135463	0	CG13117	CG13117
chr2L	9792989	9793288	Filter_SAM_or_BAM__output_SAM_or_BAM_on_data_207__bam_peak_1063	133	.	2.0727	15.1702	13.3305	149	Promoter (<=1kb)	1	9791961	9793107	1147	2	NM_001273371	0	CG13123	CG13123
chr2L	9907264	9907675	Filter_SAM_or_BAM__output_SAM_or_BAM_on_data_207__bam_peak_1070	603	.	3.93533	63.1825	60.3458	679	Promoter (<=1kb)	1	9903279	9908633	5355	2	NM_001169457	958	CG13124	CG13124
chr2L	9908427	9908883	Filter_SAM_or_BAM__output_SAM_or_BAM_on_data_207__bam_peak_1071	641	.	4.33297	67.0957	64.1753	970	Promoter (<=1kb)	1	9903279	9908633	5355	2	NM_001169457	0	CG13124	CG13124
chr2R	12686054	12686281	Filter_SAM_or_BAM__output_SAM_or_BAM_on_data_207__bam_peak_2979	179	.	2.79103	19.9018	17.9464	109	Promoter (<=1kb)	2	12686249	12688786	2538	1	NM_001273994	0	CG13148	CG13148
chr3L	4283768	4283981	Filter_SAM_or_BAM__output_SAM_or_BAM_on_data_207__bam_peak_4849	85	.	1.87811	10.209	8.50642	68	Promoter (<=1kb)	3	4283851	4286865	3015	1	NM_139630	0	CG1316	CG1316
chr2R	12239857	12240080	Filter_SAM_or_BAM__output_SAM_or_BAM_on_data_207__bam_peak_2914	156	.	3.95733	17.5131	15.6138	151	Promoter (<=1kb)	2	12240399	12240813	415	1	NM_136906	-319	CG13170	CG13170
chr2R	11885510	11885787	Filter_SAM_or_BAM__output_SAM_or_BAM_on_data_207__bam_peak_2879	253	.	3.93125	27.4779	25.3567	100	Promoter (<=1kb)	2	11867876	11885585	17710	2	NM_001103809	0	CG13185	CG13185
chr2R	11825167	11825454	Filter_SAM_or_BAM__output_SAM_or_BAM_on_data_207__bam_peak_2874	151	.	3.20687	17.0878	15.1995	144	Promoter (<=1kb)	2	11825345	11827097	1753	1	NM_136858	0	CG13192	CG13192
chr2R	11366355	11366556	Filter_SAM_or_BAM__output_SAM_or_BAM_on_data_207__bam_peak_2806	97	.	2.95146	11.4915	9.7514	59	Promoter (<=1kb)	2	11366710	11370287	3578	1	NM_136834	-154	CG13204	CG13204
chr2R	11366731	11366856	Filter_SAM_or_BAM__output_SAM_or_BAM_on_data_207__bam_peak_2807	156	.	3.39865	17.5428	15.6427	160	Promoter (<=1kb)	2	11366710	11370287	3578	1	NM_136834	22	CG13204	CG13204
chr2R	11367233	11367638	Filter_SAM_or_BAM__output_SAM_or_BAM_on_data_207__bam_peak_2808	430	.	3.89745	45.5233	43.0394	181	Promoter (<=1kb)	2	11366710	11370287	3578	1	NM_136834	524	CG13204	CG13204
chr2R	11368031	11368353	Filter_SAM_or_BAM__output_SAM_or_BAM_on_data_207__bam_peak_2809	336	.	3.34029	35.9596	33.6666	195	Promoter (<=1kb)	2	11368286	11370287	2002	1	NM_165827	0	CG13204	CG13204
chr3L	20410827	20411149	Filter_SAM_or_BAM__output_SAM_or_BAM_on_data_207__bam_peak_6444	207	.	2.78986	22.7553	20.7351	174	Promoter (<=1kb)	3	20407103	20410566	3464	2	NM_140962	-262	CG13248	CG13248
chr3L	20730107	20730772	Filter_SAM_or_BAM__output_SAM_or_BAM_on_data_207__bam_peak_6468	614	.	4.96957	64.3298	61.4686	294	Promoter (<=1kb)	3	20730591	20744508	13918	1	NM_140991	0	CG13252	CG13252
chr3L	8748920	8749196	Filter_SAM_or_BAM__output_SAM_or_BAM_on_data_207__bam_peak_5218	207	.	3.39596	22.74	20.7204	167	Promoter (<=1kb)	3	8749139	8749726	588	2	NM_144187	530	CG13306	CG13306
chr2R	12923750	12923952	Filter_SAM_or_BAM__output_SAM_or_BAM_on_data_207__bam_peak_3005	93	.	1.95382	11.0275	9.30106	60	Promoter (<=1kb)	2	12923904	12924664	761	1	NM_001169660	0	CG13319	CG13319
chr2R	13132390	13133266	Filter_SAM_or_BAM__output_SAM_or_BAM_on_data_207__bam_peak_3035	852	.	5.35249	88.6241	85.2159	172	Promoter (<=1kb)	2	13129511	13132455	2945	2	NM_136994	0	CG13326	CG13326
chr2R	13824267	13824911	Filter_SAM_or_BAM__output_SAM_or_BAM_on_data_207__bam_peak_3100	215	.	2.8995	23.6206	21.5813	483	Promoter (<=1kb)	2	13824858	13825572	715	1	NM_137059	0	CG13339	CG13339
chr2R	13861911	13862119	Filter_SAM_or_BAM__output_SAM_or_BAM_on_data_207__bam_peak_3105	74	.	2.21881	9.15507	7.48597	84	Promoter (<=1kb)	2	13861997	13863579	1583	1	NM_001032245	0	CG13344	CG13344
chrX	620035	620298	Filter_SAM_or_BAM__output_SAM_or_BAM_on_data_207__bam_peak_9624	317	.	4.10501	34.018	31.7636	173	Promoter (<=1kb)	6	585081	620195	35115	2	NM_001297820	0	CG13366	CG13366
chr2L	8384332	8384691	Filter_SAM_or_BAM__output_SAM_or_BAM_on_data_207__bam_peak_889	176	.	2.34166	19.5826	17.6346	147	Promoter (<=1kb)	1	8384455	8388804	4350	1	NM_001201794	0	CG13384	CG13384
chr2L	8382638	8382988	Filter_SAM_or_BAM__output_SAM_or_BAM_on_data_207__bam_peak_888	319	.	2.73935	34.174	31.9167	181	Promoter (<=1kb)	1	8381821	8382807	987	2	NM_001273318	0	CG13392	CG13392
chr2L	8415116	8415388	Filter_SAM_or_BAM__output_SAM_or_BAM_on_data_207__bam_peak_896	202	.	2.92146	22.2578	20.2487	119	Promoter (<=1kb)	1	8412144	8415256	3113	2	NM_001273323	0	CG13398	CG13398
chr2R	20551927	20552383	Filter_SAM_or_BAM__output_SAM_or_BAM_on_data_207__bam_peak_3841	540	.	3.70537	56.7465	54.0427	255	Promoter (<=1kb)	2	20550334	20552090	1757	2	NM_001032271	0	CG13430	CG13430
chr3L	15809870	15810175	Filter_SAM_or_BAM__output_SAM_or_BAM_on_data_207__bam_peak_5887	485	.	4.94931	51.1545	48.5596	159	Promoter (<=1kb)	3	15809485	15809977	493	1	NM_140546	386	CG13445	CG13445
chr3L	15516478	15516724	Filter_SAM_or_BAM__output_SAM_or_BAM_on_data_207__bam_peak_5848	286	.	3.64518	30.8271	28.6372	123	Promoter (<=1kb)	3	15516533	15517056	524	2	NM_140514	332	CG13454	CG13454
chr3L	14053042	14053367	Filter_SAM_or_BAM__output_SAM_or_BAM_on_data_207__bam_peak_5720	416	.	5.02678	44.132	41.6763	156	Promoter (<=1kb)	3	14052428	14053079	652	2	NM_140433	0	CG13484	CG13484
chr2R	22060659	22061024	Filter_SAM_or_BAM__output_SAM_or_BAM_on_data_207__bam_peak_3992	330	.	2.80454	35.3316	33.0509	111	Promoter (<=1kb)	2	22058904	22060710	1807	2	NM_137787	0	CG13501	CG13501
chr2R	22853709	22853923	Filter_SAM_or_BAM__output_SAM_or_BAM_on_data_207__bam_peak_4068	138	.	3.15593	15.6938	13.8406	156	Promoter (<=1kb)	2	22847832	22853728	5897	2	NM_137882	0	CG13531	CG13531
chr2R	23383276	23383616	Filter_SAM_or_BAM__output_SAM_or_BAM_on_data_207__bam_peak_4102	194	.	2.49368	21.4695	19.4785	184	Promoter (<=1kb)	2	23377866	23383424	5559	2	NM_144045	0	CG13551	CG13551
chr2R	7614177	7614515	Filter_SAM_or_BAM__output_SAM_or_BAM_on_data_207__bam_peak_2323	193	.	3.99507	21.3192	19.3313	419	Promoter (<=1kb)	2	7595735	7614222	18488	2	NM_165546	0	CG1358	CG1358
chr2R	7620832	7621070	Filter_SAM_or_BAM__output_SAM_or_BAM_on_data_207__bam_peak_2325	98	.	2.31402	11.607	9.86405	148	Promoter (<=1kb)	2	7595265	7620711	25447	2	NM_001201944	-122	CG1358	CG1358
chr2R	24531362	24531733	Filter_SAM_or_BAM__output_SAM_or_BAM_on_data_207__bam_peak_4233	147	.	2.21423	16.6371	14.7593	189	Promoter (<=1kb)	2	24531594	24533391	1798	1	NM_138084	0	CG13585	CG13585
chr2R	24531808	24532379	Filter_SAM_or_BAM__output_SAM_or_BAM_on_data_207__bam_peak_4234	151	.	2.79266	17.0444	15.1568	337	Promoter (<=1kb)	2	24532112	24533391	1280	1	NM_166676	0	CG13585	CG13585
chr2R	7589700	7590355	Filter_SAM_or_BAM__output_SAM_or_BAM_on_data_207__bam_peak_2320	468	.	5.0982	49.4115	46.8511	495	Promoter (<=1kb)	2	7587773	7590109	2337	2	NM_136456	0	CG1360	CG1360
chr3R	23927537	23927741	Filter_SAM_or_BAM__output_SAM_or_BAM_on_data_207__bam_peak_8726	128	.	2.59044	14.6435	12.8173	147	Promoter (<=1kb)	4	23926372	23927634	1263	2	NM_001275961	0	CG13601	CG13601
chr3R	23986467	23986709	Filter_SAM_or_BAM__output_SAM_or_BAM_on_data_207__bam_peak_8735	202	.	3.56737	22.2781	20.2685	60	Promoter (<=1kb)	4	23985213	23986569	1357	2	NM_142943	0	CG13603	CG13603
chr3R	23992816	23993279	Filter_SAM_or_BAM__output_SAM_or_BAM_on_data_207__bam_peak_8736	217	.	2.48409	23.7875	21.7449	161	Promoter (<=1kb)	4	23988806	23992916	4111	2	NM_001104428	0	CG13604	CG13604
chr3R	24112302	24112820	Filter_SAM_or_BAM__output_SAM_or_BAM_on_data_207__bam_peak_8763	411	.	4.07056	43.6189	41.1735	170	Promoter (<=1kb)	4	24109944	24112389	2446	2	NM_142957	0	CG13605	CG13605
chr3R	24226854	24227168	Filter_SAM_or_BAM__output_SAM_or_BAM_on_data_207__bam_peak_8774	118	.	2.72424	13.6251	11.8256	155	Promoter (<=1kb)	4	24227023	24228538	1516	1	NM_142976	0	CG13609	CG13609
chr3R	24530436	24530684	Filter_SAM_or_BAM__output_SAM_or_BAM_on_data_207__bam_peak_8801	124	.	2.3957	14.3094	12.4913	77	Promoter (<=1kb)	4	24529773	24530558	786	2	NM_143010	0	CG13623	CG13623
chr3R	24769039	24769101	Filter_SAM_or_BAM__output_SAM_or_BAM_on_data_207__bam_peak_8832	328	.	3.73571	35.0908	32.8149	341	Promoter (<=1kb)	4	24769351	24770111	761	1	NM_143995	-250	CG13631	CG13631
chr3R	24769176	24769422	Filter_SAM_or_BAM__output_SAM_or_BAM_on_data_207__bam_peak_8833	162	.	3.24003	18.1773	16.2621	60	Promoter (<=1kb)	4	24769351	24770111	761	1	NM_143995	0	CG13631	CG13631
chr3R	25287253	25287498	Filter_SAM_or_BAM__output_SAM_or_BAM_on_data_207__bam_peak_8880	115	.	2.50111	13.3702	11.5779	121	Promoter (<=1kb)	4	25287474	25288930	1457	1	NM_143117	0	CG13658	CG13658
chr3R	25215098	25215359	Filter_SAM_or_BAM__output_SAM_or_BAM_on_data_207__bam_peak_8871	101	.	2.28112	11.8749	10.1238	113	Promoter (<=1kb)	4	25214325	25215188	864	2	NM_143094	0	CG13663	CG13663
chr3L	8405237	8405499	Filter_SAM_or_BAM__output_SAM_or_BAM_on_data_207__bam_peak_5173	255	.	4.70667	27.721	25.5948	148	Promoter (<=1kb)	3	8405454	8407354	1901	1	NM_168274	0	CG13667	CG13667
chr2L	602435	602815	Filter_SAM_or_BAM__output_SAM_or_BAM_on_data_207__bam_peak_109	203	.	3.2129	22.3789	20.3672	171	Promoter (<=1kb)	1	602813	603562	750	1	NM_134694	0	CG13689	CG13689
chr2L	419642	419984	Filter_SAM_or_BAM__output_SAM_or_BAM_on_data_207__bam_peak_62	215	.	2.8995	23.6206	21.5813	225	Promoter (<=1kb)	1	418434	419652	1219	2	NM_134677	0	CG13690	CG13690
chr3L	4840508	4840920	Filter_SAM_or_BAM__output_SAM_or_BAM_on_data_207__bam_peak_4889	638	.	4.36864	66.7747	63.8615	248	Promoter (<=1kb)	3	4837791	4840108	2318	2	NM_001259705	-401	CG13707	CG13707
chr2R	10075570	10075777	Filter_SAM_or_BAM__output_SAM_or_BAM_on_data_207__bam_peak_2642	83	.	2.14134	10.0479	8.35057	47	Promoter (<=1kb)	2	10070981	10075645	4665	2	NM_136707	0	CG1371	CG1371
chr2R	10076215	10076477	Filter_SAM_or_BAM__output_SAM_or_BAM_on_data_207__bam_peak_2643	89	.	2.0529	10.6456	8.9311	242	Promoter (<=1kb)	2	10070981	10075645	4665	2	NM_136707	-571	CG1371	CG1371
chr2R	9094632	9094930	Filter_SAM_or_BAM__output_SAM_or_BAM_on_data_207__bam_peak_2500	149	.	2.90049	16.8014	14.9198	152	Promoter (<=1kb)	2	9092506	9094658	2153	2	NM_176109	0	CG13741	CG13741
chr2R	8900107	8900411	Filter_SAM_or_BAM__output_SAM_or_BAM_on_data_207__bam_peak_2479	351	.	4.99638	37.5234	35.1991	133	Promoter (<=1kb)	2	8900241	8900617	377	1	NM_136572	0	CG13751	CG13751
chr2L	6566064	6566358	Filter_SAM_or_BAM__output_SAM_or_BAM_on_data_207__bam_peak_661	243	.	3.94335	26.4811	24.3807	167	Promoter (<=1kb)	1	6564112	6566181	2070	2	NM_001298752	0	CG13766	CG13766
chr2L	6907807	6908125	Filter_SAM_or_BAM__output_SAM_or_BAM_on_data_207__bam_peak_691	236	.	3.54929	25.7398	23.6549	135	Promoter (<=1kb)	1	6906666	6907844	1179	2	NM_135237	0	CG13773	CG13773
chr2L	6956865	6957065	Filter_SAM_or_BAM__output_SAM_or_BAM_on_data_207__bam_peak_701	47	.	2.02817	6.33751	4.76805	82	Promoter (<=1kb)	1	6954357	6956950	2594	2	NM_001298765	0	CG13775	CG13775
chr2L	7219893	7220301	Filter_SAM_or_BAM__output_SAM_or_BAM_on_data_207__bam_peak_740	411	.	2.80916	43.5755	41.1306	197	Promoter (<=1kb)	1	7204538	7220033	15496	2	NM_001273245	0	CG13784	CG13784
chr3L	2262663	2262964	Filter_SAM_or_BAM__output_SAM_or_BAM_on_data_207__bam_peak_4600	104	.	2.58413	12.2088	10.4486	185	Promoter (<=1kb)	3	2262919	2263615	697	1	NM_139449	0	CG13807	CG13807
chr3L	20230348	20230750	Filter_SAM_or_BAM__output_SAM_or_BAM_on_data_207__bam_peak_6418	226	.	3.50967	24.668	22.6065	141	Promoter (<=1kb)	3	20231669	20233255	1587	1	NM_140938	-919	CG13813	CG13813
chr3R	22410826	22411028	Filter_SAM_or_BAM__output_SAM_or_BAM_on_data_207__bam_peak_8543	48	.	1.92622	6.43969	4.86548	135	Promoter (<=1kb)	4	22408566	22410915	2350	2	NM_142781	0	CG13850	CG13850
chr2R	20313422	20313936	Filter_SAM_or_BAM__output_SAM_or_BAM_on_data_207__bam_peak_3832	415	.	3.96685	43.9975	41.5441	257	Promoter (<=1kb)	2	20308780	20313623	4844	2	NM_001169744	0	CG13868	CG13868
chr3L	205761	206229	Filter_SAM_or_BAM__output_SAM_or_BAM_on_data_207__bam_peak_4348	212	.	3.23943	23.2677	21.236	353	Promoter (<=1kb)	3	206134	207527	1394	1	NM_138165	0	CG13876	CG13876
chr3L	837647	837874	Filter_SAM_or_BAM__output_SAM_or_BAM_on_data_207__bam_peak_4446	82	.	2.51821	9.98386	8.28943	61	Promoter (<=1kb)	3	837861	839747	1887	1	NM_001259609	0	CG13887	CG13887
chr3L	432544	432944	Filter_SAM_or_BAM__output_SAM_or_BAM_on_data_207__bam_peak_4374	789	.	4.59905	82.1593	78.9045	165	Promoter (<=1kb)	3	433146	433906	761	2	NM_138192	962	CG13891	CG13891
chr3L	603768	604279	Filter_SAM_or_BAM__output_SAM_or_BAM_on_data_207__bam_peak_4398	679	.	3.96649	70.9035	67.9005	168	Promoter (<=1kb)	3	599094	604008	4915	2	NM_138198	0	CG13893	CG13893
chr3L	604725	605090	Filter_SAM_or_BAM__output_SAM_or_BAM_on_data_207__bam_peak_4399	350	.	2.5538	37.3736	35.0524	187	Promoter (<=1kb)	3	599094	604008	4915	2	NM_138198	-718	CG13893	CG13893
chr3L	708009	708397	Filter_SAM_or_BAM__output_SAM_or_BAM_on_data_207__bam_peak_4428	466	.	3.31727	49.1734	46.6178	436	Promoter (<=1kb)	3	705948	708205	2258	2	NM_001274291	0	CG13895	CG13895
chr3L	712043	712380	Filter_SAM_or_BAM__output_SAM_or_BAM_on_data_207__bam_peak_4430	439	.	3.90594	46.4492	43.9471	162	Promoter (<=1kb)	3	710820	711850	1031	2	NM_001274292	-194	CG13896	CG13896
chr3L	880979	881262	Filter_SAM_or_BAM__output_SAM_or_BAM_on_data_207__bam_peak_4452	239	.	2.59654	26.023	23.9324	181	Promoter (<=1kb)	3	877291	881045	3755	2	NM_001299965	0	CG13907	CG13907
chr3L	881735	882325	Filter_SAM_or_BAM__output_SAM_or_BAM_on_data_207__bam_peak_4453	423	.	4.40562	44.7977	42.3284	355	Promoter (<=1kb)	3	877291	882013	4723	2	NM_138225	0	CG13907	CG13907
chr3L	882722	883219	Filter_SAM_or_BAM__output_SAM_or_BAM_on_data_207__bam_peak_4454	515	.	4.17353	54.1858	51.5321	336	Promoter (<=1kb)	3	877291	882013	4723	2	NM_138225	-710	CG13907	CG13907
chr3L	1188860	1189082	Filter_SAM_or_BAM__output_SAM_or_BAM_on_data_207__bam_peak_4482	152	.	2.49737	17.09	15.2015	125	Promoter (<=1kb)	3	1189588	1190472	885	1	NM_138235	-506	CG13912	CG13912
chr3L	1586347	1586860	Filter_SAM_or_BAM__output_SAM_or_BAM_on_data_207__bam_peak_4529	769	.	7.82497	80.1445	76.9351	307	Promoter (<=1kb)	3	1586694	1600845	14152	1	NM_001316470	0	CG13917	CG13917
chr3L	1883429	1883710	Filter_SAM_or_BAM__output_SAM_or_BAM_on_data_207__bam_peak_4567	195	.	3.00608	21.5123	19.5203	131	Promoter (<=1kb)	3	1876551	1883041	6491	2	NM_167924	-389	CG13937	CG13937
chr2L	6411953	6412263	Filter_SAM_or_BAM__output_SAM_or_BAM_on_data_207__bam_peak_636	235	.	3.80306	25.6471	23.5641	136	Promoter (<=1kb)	1	6412315	6414418	2104	1	NM_001298740	-52	CG13982	CG13982
chr2L	6062696	6063061	Filter_SAM_or_BAM__output_SAM_or_BAM_on_data_207__bam_peak_616	148	.	2.95551	16.7197	14.8402	233	Promoter (<=1kb)	1	6062989	6063629	641	1	NM_001298729	0	CG13994	CG13994
chr2L	5054956	5055268	Filter_SAM_or_BAM__output_SAM_or_BAM_on_data_207__bam_peak_523	218	.	2.58514	23.9085	21.8631	145	Promoter (<=1kb)	1	5054579	5055016	438	2	NM_135059	0	CG14036	CG14036
chr2L	4971374	4971728	Filter_SAM_or_BAM__output_SAM_or_BAM_on_data_207__bam_peak_509	236	.	3.06926	25.6958	23.6118	342	Promoter (<=1kb)	1	4971702	4973687	1986	1	NM_135042	0	CG14043	CG14043
chr2R	10032744	10032963	Filter_SAM_or_BAM__output_SAM_or_BAM_on_data_207__bam_peak_2629	83	.	2.41224	10.0557	8.35823	77	Promoter (<=1kb)	2	10028443	10032893	4451	2	NM_001273914	0	CG1407	CG1407
chr3L	18819935	18820261	Filter_SAM_or_BAM__output_SAM_or_BAM_on_data_207__bam_peak_6255	548	.	4.70373	57.5753	54.8551	692	Promoter (<=1kb)	3	18802265	18820675	18411	2	NM_001275093	414	CG14073	CG14073
chr3L	19590467	19590746	Filter_SAM_or_BAM__output_SAM_or_BAM_on_data_207__bam_peak_6341	40	.	1.83867	5.5478	4.00949	180	Promoter (<=1kb)	3	19589072	19590524	1453	2	NM_140873	0	CG14100	CG14100
chr3L	19801234	19801503	Filter_SAM_or_BAM__output_SAM_or_BAM_on_data_207__bam_peak_6363	46	.	1.87278	6.24013	4.67441	242	Promoter (<=1kb)	3	19798975	19801291	2317	2	NM_140890	0	CG14102	CG14102
chr3L	11691457	11691804	Filter_SAM_or_BAM__output_SAM_or_BAM_on_data_207__bam_peak_5549	524	.	4.25902	55.1176	52.4458	184	Promoter (<=1kb)	3	11691571	11692757	1187	1	NM_001274792	0	CG14135	CG14135
chr2L	21757950	21758179	Filter_SAM_or_BAM__output_SAM_or_BAM_on_data_207__bam_peak_2051	159	.	2.95348	17.8145	15.9082	117	Promoter (<=1kb)	1	21758010	21760915	2906	1	NM_165398	0	CG1416	CG1416
chrX	19604998	19605402	Filter_SAM_or_BAM__output_SAM_or_BAM_on_data_207__bam_peak_11363	103	.	2.24003	12.1304	10.3722	280	Promoter (<=1kb)	6	19605199	19611273	6075	1	NM_134482	0	CG14207	CG14207
chrX	19601745	19601980	Filter_SAM_or_BAM__output_SAM_or_BAM_on_data_207__bam_peak_11362	112	.	2.78227	13.0693	11.2845	55	Promoter (<=1kb)	6	19599803	19601851	2049	2	NM_001258830	0	CG14220	CG14220
chr3R	26945280	26945598	Filter_SAM_or_BAM__output_SAM_or_BAM_on_data_207__bam_peak_9027	226	.	2.67254	24.6718	22.6102	154	Promoter (<=1kb)	4	26945534	26947248	1715	1	NM_143256	0	CG14252	CG14252
chr3R	26980342	26980744	Filter_SAM_or_BAM__output_SAM_or_BAM_on_data_207__bam_peak_9034	436	.	3.24323	46.1907	43.6935	187	Promoter (<=1kb)	4	26980518	26985706	5189	1	NM_001276074	0	CG14253	CG14253
chr2L	8342292	8342820	Filter_SAM_or_BAM__output_SAM_or_BAM_on_data_207__bam_peak_879	712	.	6.10836	74.3005	71.2237	339	Promoter (<=1kb)	1	8342695	8344378	1684	1	NM_135369	0	CG14273	CG14273
chr2L	8326922	8327243	Filter_SAM_or_BAM__output_SAM_or_BAM_on_data_207__bam_peak_877	436	.	4.26104	46.197	43.6996	147	Promoter (<=1kb)	1	8327456	8332911	5456	1	NM_135367	-213	CG14275	CG14275
chr3R	19023902	19024103	Filter_SAM_or_BAM__output_SAM_or_BAM_on_data_207__bam_peak_8193	85	.	2.62103	10.2085	8.50587	170	Promoter (<=1kb)	4	19024092	19024853	762	1	NM_142515	0	CG14286	CG14286
chr3R	18905961	18906296	Filter_SAM_or_BAM__output_SAM_or_BAM_on_data_207__bam_peak_8176	750	.	5.68973	78.1904	75.0258	170	Promoter (<=1kb)	4	18904933	18905655	723	2	NM_142502	-307	CG14292	CG14292
chr3R	18215322	18215614	Filter_SAM_or_BAM__output_SAM_or_BAM_on_data_207__bam_peak_8092	321	.	3.47653	34.4076	32.1454	163	Promoter (<=1kb)	4	18216142	18218014	1873	1	NM_142433	-528	CG14314	CG14314
chr2L	1166371	1166616	Filter_SAM_or_BAM__output_SAM_or_BAM_on_data_207__bam_peak_155	174	.	3.04961	19.4398	17.4951	143	Promoter (<=1kb)	1	1166506	1167211	706	1	NM_134736	0	CG14341	CG14341
chr2L	1611139	1611435	Filter_SAM_or_BAM__output_SAM_or_BAM_on_data_207__bam_peak_177	35	.	1.68106	5.10646	3.58743	258	Promoter (<=1kb)	1	1611410	1612576	1167	1	NM_134765	0	CG14352	CG14352
chrX	8436729	8437083	Filter_SAM_or_BAM__output_SAM_or_BAM_on_data_207__bam_peak_10376	122	.	2.86532	14.0203	12.2103	146	Promoter (<=1kb)	6	8437057	8440936	3880	1	NM_132249	0	CG1440	CG1440
chr2L	20868959	20869179	Filter_SAM_or_BAM__output_SAM_or_BAM_on_data_207__bam_peak_1958	387	.	3.34645	41.1377	38.7416	119	Promoter (<=1kb)	1	20869854	20871472	1619	1	NM_001259186	-675	CG14401	CG14401
chrX	14831967	14832177	Filter_SAM_or_BAM__output_SAM_or_BAM_on_data_207__bam_peak_10914	111	.	3.44208	12.9711	11.1891	131	Promoter (<=1kb)	6	14826867	14832033	5167	2	NM_001298318	0	CG14408	CG14408
chrX	14832395	14832771	Filter_SAM_or_BAM__output_SAM_or_BAM_on_data_207__bam_peak_10915	314	.	5.63914	33.708	31.4598	186	Promoter (<=1kb)	6	14832647	14835887	3241	1	NM_001169285	0	CG14411	CG14411
chrX	14580355	14580731	Filter_SAM_or_BAM__output_SAM_or_BAM_on_data_207__bam_peak_10898	437	.	5.73719	46.2744	43.7756	194	Promoter (<=1kb)	6	14580600	14582174	1575	1	NM_001298311	0	CG14414	CG14414
chrX	6852615	6852893	Filter_SAM_or_BAM__output_SAM_or_BAM_on_data_207__bam_peak_10218	71	.	2.44959	8.84669	7.18717	129	Promoter (<=1kb)	6	6851909	6852638	730	2	NM_132135	0	CG14434	CG14434
chrX	6843748	6844069	Filter_SAM_or_BAM__output_SAM_or_BAM_on_data_207__bam_peak_10217	168	.	3.18411	18.7896	16.8604	228	Promoter (<=1kb)	6	6838174	6843921	5748	2	NM_001169211	0	CG14435	CG14435
chrX	6699195	6699691	Filter_SAM_or_BAM__output_SAM_or_BAM_on_data_207__bam_peak_10197	166	.	3.35684	18.6046	16.6792	188	Promoter (<=1kb)	6	6699508	6717432	17925	1	NM_001272360	0	CG14441	CG14441
chrX	6700409	6700775	Filter_SAM_or_BAM__output_SAM_or_BAM_on_data_207__bam_peak_10198	778	.	5.152	81.1305	77.8996	605	Promoter (<=1kb)	6	6699508	6719389	19882	1	NM_132116	902	CG14441	CG14441
chr2R	17457431	17457892	Filter_SAM_or_BAM__output_SAM_or_BAM_on_data_207__bam_peak_3529	127	.	2.50628	14.5396	12.716	155	Promoter (<=1kb)	2	17457663	17465580	7918	1	NM_166229	0	CG14478	CG14478
chr2R	17458274	17458539	Filter_SAM_or_BAM__output_SAM_or_BAM_on_data_207__bam_peak_3530	202	.	3.19852	22.2415	20.233	136	Promoter (<=1kb)	2	17458816	17465580	6765	1	NM_001299600	-277	CG14478	CG14478
chr2R	17458636	17458637	Filter_SAM_or_BAM__output_SAM_or_BAM_on_data_207__bam_peak_3531	142	.	2.50027	16.1507	14.2853	426	Promoter (<=1kb)	2	17458816	17465580	6765	1	NM_001299600	-179	CG14478	CG14478
chr2R	17585988	17586323	Filter_SAM_or_BAM__output_SAM_or_BAM_on_data_207__bam_peak_3550	246	.	2.81233	26.7994	24.6923	173	Promoter (<=1kb)	2	17585195	17586149	955	2	NM_001299612	0	CG14483	CG14483
chr2R	18287941	18288318	Filter_SAM_or_BAM__output_SAM_or_BAM_on_data_207__bam_peak_3612	180	.	2.36726	19.9966	18.039	197	Promoter (<=1kb)	2	18288696	18294712	6017	1	NM_001169721	-378	CG14502	CG14502
chr3R	29138489	29138698	Filter_SAM_or_BAM__output_SAM_or_BAM_on_data_207__bam_peak_9202	147	.	2.44518	16.588	14.7121	56	Promoter (<=1kb)	4	29137970	29138573	604	2	NM_143416	0	CG14512	CG14512
chr3R	25851179	25851627	Filter_SAM_or_BAM__output_SAM_or_BAM_on_data_207__bam_peak_8928	196	.	3.43296	21.682	19.6859	358	Promoter (<=1kb)	4	25850410	25851291	882	2	NM_143997	0	CG14545	CG14545
chr3L	22065729	22065934	Filter_SAM_or_BAM__output_SAM_or_BAM_on_data_207__bam_peak_6605	73	.	2.06576	9.02554	7.36121	132	Promoter (<=1kb)	3	22065907	22066967	1061	1	NM_141120	0	CG14561	CG14561
chr3R	7199880	7200208	Filter_SAM_or_BAM__output_SAM_or_BAM_on_data_207__bam_peak_7014	467	.	4.55688	49.307	46.7485	186	Promoter (<=1kb)	4	7200970	7203362	2393	1	NM_141447	-762	CG14609	CG14609
chrX	22443087	22443457	Filter_SAM_or_BAM__output_SAM_or_BAM_on_data_207__bam_peak_11481	523	.	4.74075	55.0269	52.3574	129	Promoter (<=1kb)	6	22444227	22447181	2955	1	NM_001298593	-770	CG14621	CG14621
chrX	843571	844021	Filter_SAM_or_BAM__output_SAM_or_BAM_on_data_207__bam_peak_9646	1198	.	6.92278	124.144	119.878	228	Promoter (<=1kb)	6	844823	845297	475	1	NM_130508	-802	CG14635	CG14635
chr3R	4232197	4232425	Filter_SAM_or_BAM__output_SAM_or_BAM_on_data_207__bam_peak_6731	153	.	2.74341	17.2313	15.3387	160	Promoter (<=1kb)	4	4230779	4232342	1564	2	NM_141183	0	CG14641	CG14641
chr3R	4242608	4242886	Filter_SAM_or_BAM__output_SAM_or_BAM_on_data_207__bam_peak_6734	45	.	1.89704	6.136	4.57391	259	Promoter (<=1kb)	4	4241045	4242717	1673	2	NM_001259972	0	CG14642	CG14642
chr3R	4390162	4390468	Filter_SAM_or_BAM__output_SAM_or_BAM_on_data_207__bam_peak_6748	357	.	3.61622	38.1347	35.7983	145	Promoter (<=1kb)	4	4390366	4391999	1634	1	NM_001202236	0	CG14646	CG14646
chr3R	4437174	4437485	Filter_SAM_or_BAM__output_SAM_or_BAM_on_data_207__bam_peak_6754	155	.	2.60071	17.4369	15.5395	148	Promoter (<=1kb)	4	4437387	4441328	3942	1	NM_141216	0	CG14650	CG14650
chr3R	4821227	4821678	Filter_SAM_or_BAM__output_SAM_or_BAM_on_data_207__bam_peak_6797	370	.	3.26626	39.3769	37.0151	290	Promoter (<=1kb)	4	4817980	4821432	3453	2	NM_001275339	0	CG14657	CG14657
chr3R	5374906	5375170	Filter_SAM_or_BAM__output_SAM_or_BAM_on_data_207__bam_peak_6859	92	.	2.1274	11.009	9.28296	126	Promoter (<=1kb)	4	5375022	5376460	1439	1	NM_001014607	0	CG14667	CG14667
chrX	9878171	9878467	Filter_SAM_or_BAM__output_SAM_or_BAM_on_data_207__bam_peak_10518	65	.	2.78295	8.16095	6.52396	134	Promoter (<=1kb)	6	9878422	9879279	858	1	NM_132357	0	CG1468	CG1468
chr3R	10696212	10696674	Filter_SAM_or_BAM__output_SAM_or_BAM_on_data_207__bam_peak_7384	115	.	2.36807	13.3769	11.5842	274	Promoter (<=1kb)	4	10696647	10698976	2330	1	NM_176455	0	CG14683	CG14683
chr3R	10884762	10885246	Filter_SAM_or_BAM__output_SAM_or_BAM_on_data_207__bam_peak_7403	324	.	3.09732	34.7577	32.4884	437	Promoter (<=1kb)	4	10882433	10885001	2569	2	NM_141778	0	CG14696	CG14696
chr3R	11619619	11620169	Filter_SAM_or_BAM__output_SAM_or_BAM_on_data_207__bam_peak_7459	92	.	2.04937	10.9691	9.24473	160	Promoter (<=1kb)	4	11620090	11621728	1639	1	NM_141835	0	CG14710	CG14710
chr2R	8014177	8014704	Filter_SAM_or_BAM__output_SAM_or_BAM_on_data_207__bam_peak_2391	894	.	5.95033	92.934	89.4224	214	Promoter (<=1kb)	2	8009119	8013755	4637	2	NM_136502	-423	CG14762	CG14762
chr2R	8723600	8724009	Filter_SAM_or_BAM__output_SAM_or_BAM_on_data_207__bam_peak_2469	148	.	2.05906	16.7758	14.8949	183	Promoter (<=1kb)	2	8718017	8723839	5823	2	NM_144143	0	CG14767	CG14767
chrX	1512734	1513182	Filter_SAM_or_BAM__output_SAM_or_BAM_on_data_207__bam_peak_9701	418	.	4.47277	44.263	41.8045	160	Promoter (<=1kb)	6	1512227	1512803	577	2	NM_130569	0	CG14795	CG14795
chrX	1877137	1877460	Filter_SAM_or_BAM__output_SAM_or_BAM_on_data_207__bam_peak_9730	155	.	3.02278	17.4671	15.5688	175	Promoter (<=1kb)	6	1877317	1879077	1761	1	NM_130598	0	CG14805	CG14805
chrX	1880333	1880592	Filter_SAM_or_BAM__output_SAM_or_BAM_on_data_207__bam_peak_9731	85	.	2.83359	10.3031	8.59856	107	Promoter (<=1kb)	6	1880531	1881432	902	1	NM_001272218	0	CG14806	CG14806
chr3R	14563037	14563310	Filter_SAM_or_BAM__output_SAM_or_BAM_on_data_207__bam_peak_7740	508	.	6.34342	53.519	50.8788	131	Promoter (<=1kb)	4	14562340	14562845	506	1	NM_142115	698	CG14851	CG14851
chr3R	14801304	14801749	Filter_SAM_or_BAM__output_SAM_or_BAM_on_data_207__bam_peak_7784	35	.	1.69074	5.03292	3.51784	70	Promoter (<=1kb)	4	14801773	14804342	2570	1	NM_142135	-24	CG14857	CG14857
chrX	21323650	21324415	Filter_SAM_or_BAM__output_SAM_or_BAM_on_data_207__bam_peak_11456	353	.	4.6648	37.681	35.3541	423	Promoter (<=1kb)	6	21324046	21328150	4105	1	NM_134606	0	CG1486	CG1486
chr3R	16349212	16349449	Filter_SAM_or_BAM__output_SAM_or_BAM_on_data_207__bam_peak_7960	44	.	1.79721	6.0128	4.45634	181	Promoter (<=1kb)	4	16345825	16349226	3402	2	NM_001275700	0	CG14879	CG14879
chr3R	16455902	16456106	Filter_SAM_or_BAM__output_SAM_or_BAM_on_data_207__bam_peak_7973	121	.	2.47931	13.9911	12.182	158	Promoter (<=1kb)	4	16456052	16458233	2182	1	NM_142290	0	CG14883	CG14883
chr3R	16624676	16625396	Filter_SAM_or_BAM__output_SAM_or_BAM_on_data_207__bam_peak_7979	360	.	3.93032	38.3599	36.0193	221	Promoter (<=1kb)	4	16622736	16624717	1982	2	NM_142312	0	CG14905	CG14905
chr3R	16651003	16651223	Filter_SAM_or_BAM__output_SAM_or_BAM_on_data_207__bam_peak_7983	147	.	2.70351	16.6712	14.7928	117	Promoter (<=1kb)	4	16649981	16651157	1177	2	NM_142316	0	CG14906	CG14906
chr3R	16652179	16652539	Filter_SAM_or_BAM__output_SAM_or_BAM_on_data_207__bam_peak_7984	594	.	5.00222	62.2739	59.4564	188	Promoter (<=1kb)	4	16651217	16652319	1103	2	NM_142317	0	CG14907	CG14907
chrX	12012092	12012543	Filter_SAM_or_BAM__output_SAM_or_BAM_on_data_207__bam_peak_10688	120	.	3.35463	13.8977	12.0912	120	Promoter (<=1kb)	6	12009711	12012211	2501	2	NM_001316624	0	CG1492	CG1492
chr3L	3192418	3192830	Filter_SAM_or_BAM__output_SAM_or_BAM_on_data_207__bam_peak_4705	145	.	2.59154	16.4405	14.5682	279	Promoter (<=1kb)	3	3190622	3192491	1870	2	NM_139526	0	CG14965	CG14965
chr3L	3197534	3197822	Filter_SAM_or_BAM__output_SAM_or_BAM_on_data_207__bam_peak_4707	164	.	2.82416	18.3777	16.4582	171	Promoter (<=1kb)	3	3197045	3197631	587	2	NM_139527	0	CG14966	CG14966
chr3L	3303109	3303445	Filter_SAM_or_BAM__output_SAM_or_BAM_on_data_207__bam_peak_4725	219	.	2.84865	24.034	21.9858	174	Promoter (<=1kb)	3	3299336	3303112	3777	2	NM_139543	0	CG14968	CG14968
chr3L	4092823	4093031	Filter_SAM_or_BAM__output_SAM_or_BAM_on_data_207__bam_peak_4819	101	.	2.72847	11.8609	10.1102	170	Promoter (<=1kb)	3	4093207	4094344	1138	1	NM_139599	-176	CG14990	CG14990
chr3L	4239307	4240008	Filter_SAM_or_BAM__output_SAM_or_BAM_on_data_207__bam_peak_4838	548	.	3.45004	57.5776	54.8571	435	Promoter (<=1kb)	3	4240173	4242603	2431	1	NM_168071	-165	CG14997	CG14997
chr3L	4240129	4240463	Filter_SAM_or_BAM__output_SAM_or_BAM_on_data_207__bam_peak_4839	161	.	2.65426	18.0417	16.1298	145	Promoter (<=1kb)	3	4240173	4242603	2431	1	NM_168071	0	CG14997	CG14997
chr3L	4405885	4406246	Filter_SAM_or_BAM__output_SAM_or_BAM_on_data_207__bam_peak_4857	76	.	2.01659	9.34769	7.67294	189	Promoter (<=1kb)	3	4405127	4406059	933	2	NM_001104032	0	CG15019	CG15019
chr3L	4464686	4464989	Filter_SAM_or_BAM__output_SAM_or_BAM_on_data_207__bam_peak_4866	280	.	4.74193	30.2751	28.0964	173	Promoter (<=1kb)	3	4462974	4463823	850	2	NM_144079	-864	CG15024	CG15024
chr3R	19491060	19491305	Filter_SAM_or_BAM__output_SAM_or_BAM_on_data_207__bam_peak_8224	341	.	4.40227	36.4058	34.1037	123	Promoter (<=1kb)	4	19489570	19491115	1546	2	NM_142553	0	CG15025	CG15025
chrX	15085834	15086095	Filter_SAM_or_BAM__output_SAM_or_BAM_on_data_207__bam_peak_10941	148	.	3.70329	16.7225	14.8429	152	Promoter (<=1kb)	6	15085159	15085827	669	2	NM_132771	-8	CG15027	CG15027
chr2R	18705827	18706029	Filter_SAM_or_BAM__output_SAM_or_BAM_on_data_207__bam_peak_3683	163	.	2.73125	18.2509	16.3338	123	Promoter (<=1kb)	2	18705977	18708226	2250	1	NM_001299659	0	CG15073	CG15073
chr2R	18835202	18835469	Filter_SAM_or_BAM__output_SAM_or_BAM_on_data_207__bam_peak_3702	194	.	3.07192	21.4112	19.4212	146	Promoter (<=1kb)	2	18835263	18836842	1580	1	NM_137536	0	CG15083	CG15083
chr2R	18777292	18777716	Filter_SAM_or_BAM__output_SAM_or_BAM_on_data_207__bam_peak_3689	170	.	2.97404	18.9327	17.0002	379	Promoter (<=1kb)	2	18775669	18776978	1310	2	NM_166306	-315	CG15093	CG15093
chr2R	18829558	18829850	Filter_SAM_or_BAM__output_SAM_or_BAM_on_data_207__bam_peak_3699	61	.	2.43157	7.79953	6.17497	127	Promoter (<=1kb)	2	18822188	18829699	7512	2	NM_001202044	0	CG15097	CG15097
chr2R	18834598	18834845	Filter_SAM_or_BAM__output_SAM_or_BAM_on_data_207__bam_peak_3701	280	.	3.38027	30.2483	28.0702	89	Promoter (<=1kb)	2	18833372	18834775	1404	2	NM_137535	0	CG15098	CG15098
chr2R	18846217	18846828	Filter_SAM_or_BAM__output_SAM_or_BAM_on_data_207__bam_peak_3705	267	.	3.13604	28.9214	26.7703	444	Promoter (<=1kb)	2	18836821	18846619	9799	2	NM_001274152	0	CG15099	CG15099
chr2R	19137101	19137583	Filter_SAM_or_BAM__output_SAM_or_BAM_on_data_207__bam_peak_3717	144	.	2.68504	16.3287	14.459	292	Promoter (<=1kb)	2	19137372	19141034	3663	1	NM_137553	0	CG15111	CG15111
chr2R	19125687	19126511	Filter_SAM_or_BAM__output_SAM_or_BAM_on_data_207__bam_peak_3714	181	.	2.39759	20.1014	18.1409	196	Promoter (<=1kb)	2	19122231	19126269	4039	2	NM_001299670	0	CG15117	CG15117
chr2R	19129227	19129537	Filter_SAM_or_BAM__output_SAM_or_BAM_on_data_207__bam_peak_3716	141	.	2.35778	16.0021	14.1406	212	Promoter (<=1kb)	2	19122231	19129300	7070	2	NM_137551	0	CG15117	CG15117
chr2L	17410481	17410797	Filter_SAM_or_BAM__output_SAM_or_BAM_on_data_207__bam_peak_1686	65	.	1.87909	8.19109	6.55316	163	Promoter (<=1kb)	1	17410641	17413499	2859	1	NM_135993	0	CG15141	CG15141
chr2L	18590709	18591056	Filter_SAM_or_BAM__output_SAM_or_BAM_on_data_207__bam_peak_1746	108	.	2.14696	12.6477	10.8749	173	Promoter (<=1kb)	1	18590891	18595429	4539	1	NM_001299117	0	CG15160	CG15160
chrX	10840975	10841303	Filter_SAM_or_BAM__output_SAM_or_BAM_on_data_207__bam_peak_10586	248	.	3.524	26.9355	24.8251	121	Promoter (<=1kb)	6	10842205	10842995	791	1	NM_132426	-902	CG15209	CG15209
chr2L	14851768	14852049	Filter_SAM_or_BAM__output_SAM_or_BAM_on_data_207__bam_peak_1495	326	.	4.73068	34.8807	32.6093	113	Promoter (<=1kb)	1	14844993	14851749	6757	2	NM_165093	-20	CG15279	CG15279
chrX	21028154	21028510	Filter_SAM_or_BAM__output_SAM_or_BAM_on_data_207__bam_peak_11421	168	.	2.69557	18.8233	16.893	193	Promoter (<=1kb)	6	21026125	21028361	2237	2	NM_001298576	0	CG1532	CG1532
chr2L	1980651	1980855	Filter_SAM_or_BAM__output_SAM_or_BAM_on_data_207__bam_peak_211	81	.	2.61036	9.83759	8.14653	97	Promoter (<=1kb)	1	1975463	1980755	5293	2	NM_134789	0	CG15356	CG15356
chr2L	1980969	1981205	Filter_SAM_or_BAM__output_SAM_or_BAM_on_data_207__bam_peak_212	153	.	2.8507	17.2439	15.3509	185	Promoter (<=1kb)	1	1981176	1982099	924	1	NM_134790	0	CG15362	CG15362
chr2L	2226241	2226520	Filter_SAM_or_BAM__output_SAM_or_BAM_on_data_207__bam_peak_255	205	.	2.58102	22.5184	20.5036	132	Promoter (<=1kb)	1	2225545	2226294	750	2	NM_001103588	0	CG15387	CG15387
chr2L	2374335	2374824	Filter_SAM_or_BAM__output_SAM_or_BAM_on_data_207__bam_peak_268	235	.	2.37485	25.6374	23.5547	255	Promoter (<=1kb)	1	2374713	2375697	985	1	NM_134832	0	CG15390	CG15390
chr3R	31213259	31213570	Filter_SAM_or_BAM__output_SAM_or_BAM_on_data_207__bam_peak_9421	169	.	2.62248	18.8976	16.9657	178	Promoter (<=1kb)	4	31213458	31214784	1327	1	NM_143593	0	CG1542	CG1542
chr2L	4442233	4442465	Filter_SAM_or_BAM__output_SAM_or_BAM_on_data_207__bam_peak_472	131	.	2.49527	14.9835	13.1484	48	Promoter (<=1kb)	1	4442320	4442985	666	1	NM_001273098	0	CG15432	CG15432
chr2L	4459664	4459891	Filter_SAM_or_BAM__output_SAM_or_BAM_on_data_207__bam_peak_478	202	.	3.17464	22.2189	20.2106	150	Promoter (<=1kb)	1	4459729	4461746	2018	1	NM_001298674	0	CG15435	CG15435
chr3R	31196744	31197001	Filter_SAM_or_BAM__output_SAM_or_BAM_on_data_207__bam_peak_9420	123	.	3.58855	14.144	12.3307	99	Promoter (<=1kb)	4	31196916	31203722	6807	1	NM_143592	0	CG1544	CG1544
chr2L	4454369	4454691	Filter_SAM_or_BAM__output_SAM_or_BAM_on_data_207__bam_peak_475	224	.	2.56835	24.5142	22.4558	185	Promoter (<=1kb)	1	4453169	4454453	1285	2	NM_134993	0	CG15440	CG15440
chrX	21116902	21117404	Filter_SAM_or_BAM__output_SAM_or_BAM_on_data_207__bam_peak_11439	66	.	2.52007	8.28453	6.64412	312	Promoter (<=1kb)	6	21117159	21120333	3175	1	NM_001272827	0	CG15445	CG15445
chr3R	29904029	29904385	Filter_SAM_or_BAM__output_SAM_or_BAM_on_data_207__bam_peak_9290	143	.	2.9636	16.2278	14.3609	196	Promoter (<=1kb)	4	29903240	29903825	586	2	NM_143488	-205	CG15517	CG15517
chr3R	30195517	30195829	Filter_SAM_or_BAM__output_SAM_or_BAM_on_data_207__bam_peak_9312	209	.	3.09363	23.0155	20.9897	152	Promoter (<=1kb)	4	30194790	30196228	1439	2	NM_143523	399	CG15531	CG15531
chr3R	30425097	30425371	Filter_SAM_or_BAM__output_SAM_or_BAM_on_data_207__bam_peak_9345	175	.	2.68384	19.4799	17.5343	161	Promoter (<=1kb)	4	30424499	30425162	664	2	NM_143532	0	CG15536	CG15536
chr3R	31215826	31216121	Filter_SAM_or_BAM__output_SAM_or_BAM_on_data_207__bam_peak_9422	276	.	3.52517	29.8	27.631	140	Promoter (<=1kb)	4	31214776	31215942	1167	2	NM_143594	0	CG15561	CG15561
chrX	15710908	15711167	Filter_SAM_or_BAM__output_SAM_or_BAM_on_data_207__bam_peak_10990	124	.	2.83032	14.2833	12.466	128	Promoter (<=1kb)	6	15711057	15712186	1130	1	NM_001298357	0	CG15601	CG15601
chr2R	17108720	17109031	Filter_SAM_or_BAM__output_SAM_or_BAM_on_data_207__bam_peak_3492	329	.	3.2915	35.2525	32.9736	152	Promoter (<=1kb)	2	17108844	17114360	5517	1	NM_137345	0	CG15611	CG15611
chr3L	15837374	15837612	Filter_SAM_or_BAM__output_SAM_or_BAM_on_data_207__bam_peak_5897	181	.	2.57626	20.0986	18.1382	58	Promoter (<=1kb)	3	15835693	15837482	1790	2	NM_001259849	0	CG15715	CG15715
chrX	13128578	13129147	Filter_SAM_or_BAM__output_SAM_or_BAM_on_data_207__bam_peak_10778	612	.	6.41216	64.1564	61.2987	456	Promoter (<=1kb)	6	13128952	13130290	1339	1	NM_001298258	0	CG15717	CG15717
chrX	13285425	13285789	Filter_SAM_or_BAM__output_SAM_or_BAM_on_data_207__bam_peak_10795	63	.	2.34299	7.92968	6.30135	197	Promoter (<=1kb)	6	13285707	13287741	2035	1	NM_001298268	0	CG15743	CG15743
chrX	13287893	13288150	Filter_SAM_or_BAM__output_SAM_or_BAM_on_data_207__bam_peak_10796	144	.	3.83215	16.3493	14.4793	118	Promoter (<=1kb)	6	13288051	13294433	6383	1	NM_132642	0	CG15744	CG15744
chrX	13338191	13338411	Filter_SAM_or_BAM__output_SAM_or_BAM_on_data_207__bam_peak_10816	75	.	2.60139	9.17861	7.50819	67	Promoter (<=1kb)	6	13338318	13341009	2692	1	NM_001298276	0	CG15747	CG15747
chrX	5755620	5755823	Filter_SAM_or_BAM__output_SAM_or_BAM_on_data_207__bam_peak_10106	59	.	2.52185	7.57802	5.96211	131	Promoter (<=1kb)	6	5755748	5759751	4004	1	NM_132029	0	CG15771	CG15771
chrX	5429787	5430364	Filter_SAM_or_BAM__output_SAM_or_BAM_on_data_207__bam_peak_10062	590	.	6.75594	61.885	59.0758	161	Promoter (<=1kb)	6	5430565	5432526	1962	1	NM_131995	-201	CG15784	CG15784
chrX	5430445	5430842	Filter_SAM_or_BAM__output_SAM_or_BAM_on_data_207__bam_peak_10063	740	.	6.39414	77.2188	74.0764	197	Promoter (<=1kb)	6	5430565	5432526	1962	1	NM_131995	0	CG15784	CG15784
chr3L	3159821	3160108	Filter_SAM_or_BAM__output_SAM_or_BAM_on_data_207__bam_peak_4699	117	.	2.29488	13.5442	11.7474	151	Promoter (<=1kb)	3	3159991	3162019	2029	1	NM_079173	0	CG15812	CG15812
chrX	5317161	5317505	Filter_SAM_or_BAM__output_SAM_or_BAM_on_data_207__bam_peak_10054	275	.	3.84378	29.6849	27.5182	150	Promoter (<=1kb)	6	5315130	5317295	2166	2	NM_131986	0	CG15930	CG15930
chr3R	31381209	31381424	Filter_SAM_or_BAM__output_SAM_or_BAM_on_data_207__bam_peak_9430	132	.	2.5041	15.0768	13.2394	121	Promoter (<=1kb)	4	31382109	31391893	9785	1	NM_001276211	-685	CG1607	CG1607
chrX	10601601	10601896	Filter_SAM_or_BAM__output_SAM_or_BAM_on_data_207__bam_peak_10561	418	.	5.3174	44.3069	41.8475	157	Promoter (<=1kb)	6	10598146	10601646	3501	2	NM_001272494	0	CG1628	CG1628
chrX	13370915	13371185	Filter_SAM_or_BAM__output_SAM_or_BAM_on_data_207__bam_peak_10818	40	.	1.82473	5.57896	4.03955	17	Promoter (<=1kb)	6	13370995	13380160	9166	1	NM_132651	0	CG1640	CG1640
chrX	13373200	13373405	Filter_SAM_or_BAM__output_SAM_or_BAM_on_data_207__bam_peak_10819	95	.	2.70978	11.2485	9.51602	111	Promoter (<=1kb)	6	13373759	13380160	6402	1	NM_001298277	-354	CG1640	CG1640
chrX	13373524	13374200	Filter_SAM_or_BAM__output_SAM_or_BAM_on_data_207__bam_peak_10820	596	.	6.2147	62.4978	59.676	227	Promoter (<=1kb)	6	13373759	13380160	6402	1	NM_001298277	0	CG1640	CG1640
chr2R	9819939	9820462	Filter_SAM_or_BAM__output_SAM_or_BAM_on_data_207__bam_peak_2595	512	.	4.78628	53.8721	51.2247	245	Promoter (<=1kb)	2	9810974	9820053	9080	2	NM_001299324	0	CG1648	CG1648
chr2R	9836806	9837114	Filter_SAM_or_BAM__output_SAM_or_BAM_on_data_207__bam_peak_2597	179	.	2.44698	19.9454	17.9887	157	Promoter (<=1kb)	2	9836985	9838481	1497	1	NM_136677	0	CG1663	CG1663
chr2R	9847763	9848164	Filter_SAM_or_BAM__output_SAM_or_BAM_on_data_207__bam_peak_2602	83	.	2.17748	10.0854	8.38671	45	Promoter (<=1kb)	2	9848061	9850642	2582	1	NM_136682	0	CG1671	CG1671
chr3L	9679054	9679382	Filter_SAM_or_BAM__output_SAM_or_BAM_on_data_207__bam_peak_5330	73	.	2.24957	9.06401	7.39783	70	Promoter (<=1kb)	3	9679201	9681060	1860	1	NM_140086	0	CG16717	CG16717
chrX	5879677	5879992	Filter_SAM_or_BAM__output_SAM_or_BAM_on_data_207__bam_peak_10116	225	.	2.65782	24.6	22.5396	570	Promoter (<=1kb)	6	5879869	5883391	3523	1	NM_132047	0	CG16721	CG16721
chrX	13396693	13397019	Filter_SAM_or_BAM__output_SAM_or_BAM_on_data_207__bam_peak_10828	759	.	7.89347	79.1058	75.9196	164	Promoter (<=1kb)	6	13396899	13401224	4326	1	NM_132656	0	CG1673	CG1673
chr4	231242	231565	Filter_SAM_or_BAM__output_SAM_or_BAM_on_data_207__bam_peak_9516	382	.	3.38236	40.6064	38.2203	184	Promoter (<=1kb)	5	231426	241318	9893	1	NM_205866	0	CG1674	CG1674
chrX	7286046	7286487	Filter_SAM_or_BAM__output_SAM_or_BAM_on_data_207__bam_peak_10255	106	.	3.36884	12.398	10.6319	338	Promoter (<=1kb)	6	7281089	7286195	5107	2	NM_001298048	0	CG1677	CG1677
chr2R	23957247	23957607	Filter_SAM_or_BAM__output_SAM_or_BAM_on_data_207__bam_peak_4178	172	.	2.42278	19.191	17.2519	190	Promoter (<=1kb)	2	23956335	23957405	1071	2	NM_138013	0	CG16787	CG16787
chr3R	21348999	21349250	Filter_SAM_or_BAM__output_SAM_or_BAM_on_data_207__bam_peak_8428	240	.	3.19555	26.1635	24.0696	157	Promoter (<=1kb)	4	21318300	21349601	31302	2	NM_001300514	351	CG16791	CG16791
chr3R	21349434	21349954	Filter_SAM_or_BAM__output_SAM_or_BAM_on_data_207__bam_peak_8429	786	.	5.35679	81.913	78.6642	172	Promoter (<=1kb)	4	21318300	21349601	31302	2	NM_001300514	0	CG16791	CG16791
chr2L	13222282	13222714	Filter_SAM_or_BAM__output_SAM_or_BAM_on_data_207__bam_peak_1362	111	.	2.45156	12.9073	11.1279	107	Promoter (<=1kb)	1	13222587	13224545	1959	1	NM_135775	0	CG16812	CG16812
chrX	2080330	2080828	Filter_SAM_or_BAM__output_SAM_or_BAM_on_data_207__bam_peak_9762	913	.	10.2807	94.9113	91.3525	169	Promoter (<=1kb)	6	2078343	2080405	2063	2	NM_130624	0	CG16903	CG16903
chr2L	11948525	11948850	Filter_SAM_or_BAM__output_SAM_or_BAM_on_data_207__bam_peak_1227	522	.	4.33307	54.9482	52.2799	166	Promoter (<=1kb)	1	11947965	11948623	659	1	NM_135682	561	CG16964	CG16964
chr2L	12355248	12355449	Filter_SAM_or_BAM__output_SAM_or_BAM_on_data_207__bam_peak_1260	116	.	2.90322	13.3936	11.6004	53	Promoter (<=1kb)	1	12356441	12357906	1466	1	NM_135716	-992	CG17010	CG17010
chrX	11611458	11612132	Filter_SAM_or_BAM__output_SAM_or_BAM_on_data_207__bam_peak_10639	173	.	2.91738	19.3089	17.3673	482	Promoter (<=1kb)	6	11611927	11615128	3202	1	NM_001298201	0	CG1703	CG1703
chrX	20250997	20251613	Filter_SAM_or_BAM__output_SAM_or_BAM_on_data_207__bam_peak_11396	140	.	2.44471	15.9156	14.0568	248	Promoter (<=1kb)	6	20248309	20251093	2785	2	NM_134535	0	CG17068	CG17068
chr2L	10681595	10681874	Filter_SAM_or_BAM__output_SAM_or_BAM_on_data_207__bam_peak_1156	141	.	3.80825	15.9679	14.1073	183	Promoter (<=1kb)	1	10681902	10682383	482	1	NM_001273430	-28	CG17107	CG17107
chr2L	10682398	10682679	Filter_SAM_or_BAM__output_SAM_or_BAM_on_data_207__bam_peak_1157	418	.	3.9048	44.2754	41.8168	112	Promoter (<=1kb)	1	10681966	10682528	563	1	NM_001273431	433	CG17107	CG17107
chr3R	23091635	23091997	Filter_SAM_or_BAM__output_SAM_or_BAM_on_data_207__bam_peak_8614	485	.	5.84767	51.1422	48.5477	183	Promoter (<=1kb)	4	23091724	23095184	3461	1	NM_001300550	0	CG17110	CG17110
chr3R	23057289	23057597	Filter_SAM_or_BAM__output_SAM_or_BAM_on_data_207__bam_peak_8611	252	.	2.72302	27.384	25.2646	218	Promoter (<=1kb)	4	23054410	23057547	3138	2	NM_142859	0	CG17119	CG17119
chr3L	680277	680626	Filter_SAM_or_BAM__output_SAM_or_BAM_on_data_207__bam_peak_4423	31	.	1.5706	4.62816	3.13204	51	Promoter (<=1kb)	3	677879	680326	2448	2	NM_138204	0	CG17129	CG17129
chr3R	22747481	22747728	Filter_SAM_or_BAM__output_SAM_or_BAM_on_data_207__bam_peak_8598	87	.	2.56386	10.4353	8.72592	139	Promoter (<=1kb)	4	22746446	22747599	1154	2	NM_142837	0	CG17141	CG17141
chrX	23096477	23096834	Filter_SAM_or_BAM__output_SAM_or_BAM_on_data_207__bam_peak_11510	69	.	2.2973	8.60267	6.95194	343	Promoter (<=1kb)	6	23085731	23096734	11004	2	NM_001111001	0	CG17162	CG17162
chr3L	540097	540971	Filter_SAM_or_BAM__output_SAM_or_BAM_on_data_207__bam_peak_4386	332	.	2.99756	35.5816	33.2962	692	Promoter (<=1kb)	3	540851	542147	1297	1	NM_138193	0	CG17180	CG17180
chr3R	12422607	12422878	Filter_SAM_or_BAM__output_SAM_or_BAM_on_data_207__bam_peak_7540	192	.	3.03894	21.2752	19.2884	157	Promoter (<=1kb)	4	12422768	12423606	839	1	NM_141937	0	CG17202	CG17202
chr2L	3039884	3040116	Filter_SAM_or_BAM__output_SAM_or_BAM_on_data_207__bam_peak_333	138	.	2.36199	15.6825	13.8293	90	Promoter (<=1kb)	1	3039976	3041626	1651	1	NM_164523	0	CG17221	CG17221
chr2L	3018104	3018673	Filter_SAM_or_BAM__output_SAM_or_BAM_on_data_207__bam_peak_329	831	.	4.4795	86.5261	83.1678	286	Promoter (<=1kb)	1	3016441	3018308	1868	2	NM_001169384	0	CG17224	CG17224
chr3R	11437630	11437847	Filter_SAM_or_BAM__output_SAM_or_BAM_on_data_207__bam_peak_7443	90	.	2.40581	10.7888	9.06889	109	Promoter (<=1kb)	4	11437785	11465638	27854	1	NM_141820	0	CG17230	CG17230
chr3L	20241240	20241605	Filter_SAM_or_BAM__output_SAM_or_BAM_on_data_207__bam_peak_6419	127	.	2.60275	14.6102	12.785	177	Promoter (<=1kb)	3	20233173	20241518	8346	2	NM_001259911	0	CG17233	CG17233
chr3L	20241846	20242096	Filter_SAM_or_BAM__output_SAM_or_BAM_on_data_207__bam_peak_6420	57	.	1.97408	7.39968	5.79005	90	Promoter (<=1kb)	3	20233173	20241903	8731	2	NM_001259912	0	CG17233	CG17233
chr3L	1647345	1647583	Filter_SAM_or_BAM__output_SAM_or_BAM_on_data_207__bam_peak_4538	77	.	2.14873	9.40411	7.72667	163	Promoter (<=1kb)	3	1645931	1647464	1534	2	NM_139381	0	CG17249	CG17249
chr2L	2999000	2999405	Filter_SAM_or_BAM__output_SAM_or_BAM_on_data_207__bam_peak_328	468	.	3.25481	49.3959	46.8356	202	Promoter (<=1kb)	1	2999286	3016069	16784	1	NM_134890	0	CG17265	CG17265
chr2R	6676085	6676350	Filter_SAM_or_BAM__output_SAM_or_BAM_on_data_207__bam_peak_2218	89	.	1.98259	10.6679	8.95237	165	Promoter (<=1kb)	2	6675028	6676001	974	2	NM_136380	-85	CG17266	CG17266
chr3R	20821775	20822393	Filter_SAM_or_BAM__output_SAM_or_BAM_on_data_207__bam_peak_8343	221	.	3.02579	24.2115	22.1593	381	Promoter (<=1kb)	4	20819129	20821848	2720	2	NM_001043269	0	CG17271	CG17271
chr3R	21023117	21023331	Filter_SAM_or_BAM__output_SAM_or_BAM_on_data_207__bam_peak_8369	263	.	3.19941	28.4963	26.3536	159	Promoter (<=1kb)	4	21021044	21024163	3120	2	NM_143973	832	CG17278	CG17278
chr3R	21024108	21024370	Filter_SAM_or_BAM__output_SAM_or_BAM_on_data_207__bam_peak_8371	145	.	2.63474	16.4431	14.5708	109	Promoter (<=1kb)	4	21021044	21024163	3120	2	NM_143973	0	CG17278	CG17278
chr2L	8370247	8370581	Filter_SAM_or_BAM__output_SAM_or_BAM_on_data_207__bam_peak_885	432	.	3.7451	45.7108	43.2233	167	Promoter (<=1kb)	1	8370454	8374250	3797	1	NM_001298821	0	CG17292	CG17292
chr2L	8376826	8377174	Filter_SAM_or_BAM__output_SAM_or_BAM_on_data_207__bam_peak_886	72	.	1.8613	8.91595	7.25472	271	Promoter (<=1kb)	1	8377035	8378206	1172	1	NM_135375	0	CG17294	CG17294
chr2L	16299705	16299987	Filter_SAM_or_BAM__output_SAM_or_BAM_on_data_207__bam_peak_1579	125	.	2.58153	14.4108	12.5905	173	Promoter (<=1kb)	1	16299943	16301765	1823	1	NM_001273565	0	CG17328	CG17328
chr2R	5697631	5698030	Filter_SAM_or_BAM__output_SAM_or_BAM_on_data_207__bam_peak_2131	636	.	4.04294	66.595	63.6854	222	Promoter (<=1kb)	2	5697872	5700212	2341	1	NM_136337	0	CG17337	CG17337
chr2L	19064704	19065006	Filter_SAM_or_BAM__output_SAM_or_BAM_on_data_207__bam_peak_1802	103	.	2.39319	12.1013	10.3438	200	Promoter (<=1kb)	1	19064929	19069673	4745	1	NM_136096	0	CG17343	CG17343
chr2L	6805848	6806346	Filter_SAM_or_BAM__output_SAM_or_BAM_on_data_207__bam_peak_688	120	.	2.79101	13.811	12.0067	164	Promoter (<=1kb)	1	6804619	6805792	1174	2	NM_135232	-57	CG17375	CG17375
chr2R	14411488	14411952	Filter_SAM_or_BAM__output_SAM_or_BAM_on_data_207__bam_peak_3198	284	.	3.78038	30.6638	28.4771	277	Promoter (<=1kb)	2	14409295	14411572	2278	2	NM_001299489	0	CG17385	CG17385
chr2R	4618800	4619106	Filter_SAM_or_BAM__output_SAM_or_BAM_on_data_207__bam_peak_2105	320	.	4.07638	34.3197	32.0595	202	Promoter (<=1kb)	2	4619030	4620833	1804	1	NM_001042981	0	CG17486	CG17486
chr2R	5608676	5608864	Filter_SAM_or_BAM__output_SAM_or_BAM_on_data_207__bam_peak_2125	43	.	1.83886	5.89511	4.34227	340	Promoter (<=1kb)	2	5608635	5611586	2952	1	NM_143844	42	CG17508	CG17508
chr3L	28012481	28012767	Filter_SAM_or_BAM__output_SAM_or_BAM_on_data_207__bam_peak_6716	111	.	2.60118	12.944	11.1633	111	Promoter (<=1kb)	3	27967244	28012599	45356	2	NM_001015316	0	CG17514	CG17514
chr2R	4824227	4824473	Filter_SAM_or_BAM__output_SAM_or_BAM_on_data_207__bam_peak_2109	260	.	3.92289	28.2259	26.0891	101	Promoter (<=1kb)	2	4815426	4824319	8894	2	NM_001042997	0	CG17528	CG17528
chr2L	19393796	19394130	Filter_SAM_or_BAM__output_SAM_or_BAM_on_data_207__bam_peak_1832	406	.	3.18856	43.0402	40.6057	147	Promoter (<=1kb)	1	19390370	19393835	3466	2	NM_165290	0	CG17544	CG17544
chr2L	19398253	19398595	Filter_SAM_or_BAM__output_SAM_or_BAM_on_data_207__bam_peak_1834	662	.	3.7299	69.1787	66.2128	184	Promoter (<=1kb)	1	19390370	19398493	8124	2	NM_001169544	0	CG17544	CG17544
chr2L	19398840	19399553	Filter_SAM_or_BAM__output_SAM_or_BAM_on_data_207__bam_peak_1835	974	.	4.59422	101.137	97.4289	244	Promoter (<=1kb)	1	19390370	19398493	8124	2	NM_165291	-348	CG17544	CG17544
chr3R	16995967	16996266	Filter_SAM_or_BAM__output_SAM_or_BAM_on_data_207__bam_peak_8005	208	.	3.06215	22.8768	20.8539	114	Promoter (<=1kb)	4	16994542	16996071	1530	2	NM_142324	0	CG17556	CG17556
chr2R	12869165	12869528	Filter_SAM_or_BAM__output_SAM_or_BAM_on_data_207__bam_peak_2993	362	.	3.15885	38.6021	36.2567	160	Promoter (<=1kb)	2	12849358	12869423	20066	2	NM_001273997	0	CG17574	CG17574
chr2L	18831123	18831404	Filter_SAM_or_BAM__output_SAM_or_BAM_on_data_207__bam_peak_1779	86	.	1.85071	10.3109	8.60628	172	Promoter (<=1kb)	1	18829012	18831153	2142	2	NM_001299137	0	CG17597	CG17597
chrX	13302586	13302666	Filter_SAM_or_BAM__output_SAM_or_BAM_on_data_207__bam_peak_10797	99	.	2.364	11.7061	9.95972	162	Promoter (<=1kb)	6	13294473	13302415	7943	2	NM_001298269	-172	CG1764	CG1764
chrX	13302796	13302976	Filter_SAM_or_BAM__output_SAM_or_BAM_on_data_207__bam_peak_10798	972	.	4.89454	100.977	97.2732	188	Promoter (<=1kb)	6	13294473	13302415	7943	2	NM_001298269	-382	CG1764	CG1764
chr2L	1710323	1710566	Filter_SAM_or_BAM__output_SAM_or_BAM_on_data_207__bam_peak_192	422	.	4.31311	44.695	42.2278	160	Promoter (<=1kb)	1	1707132	1710421	3290	2	NM_134768	0	CG17660	CG17660
chr2L	1752036	1752265	Filter_SAM_or_BAM__output_SAM_or_BAM_on_data_207__bam_peak_199	135	.	3.33864	15.3671	13.5219	130	Promoter (<=1kb)	1	1750687	1752122	1436	2	NM_134775	0	CG17712	CG17712
chr3R	11243886	11244431	Filter_SAM_or_BAM__output_SAM_or_BAM_on_data_207__bam_peak_7429	178	.	2.86343	19.8286	17.8749	253	Promoter (<=1kb)	4	11242208	11243999	1792	2	NM_001260114	0	CG17734	CG17734
chr3L	3239414	3240362	Filter_SAM_or_BAM__output_SAM_or_BAM_on_data_207__bam_peak_4715	806	.	5.92593	83.9375	80.6413	557	Promoter (<=1kb)	3	3236947	3239578	2632	2	NM_139537	0	CG17746	CG17746
chr3R	19607565	19607853	Filter_SAM_or_BAM__output_SAM_or_BAM_on_data_207__bam_peak_8228	306	.	2.58924	32.8386	30.6081	143	Promoter (<=1kb)	4	19607254	19609322	2069	1	NM_142559	312	CG17751	CG17751
chr3R	19610649	19610947	Filter_SAM_or_BAM__output_SAM_or_BAM_on_data_207__bam_peak_8229	261	.	2.75749	28.2803	26.1424	128	Promoter (<=1kb)	4	19610225	19612437	2213	1	NM_142560	425	CG17752	CG17752
chrX	9250189	9250558	Filter_SAM_or_BAM__output_SAM_or_BAM_on_data_207__bam_peak_10461	123	.	3.04542	14.1557	12.342	197	Promoter (<=1kb)	6	9250420	9255031	4612	1	NM_176721	0	CG17754	CG17754
chr2R	12625456	12625941	Filter_SAM_or_BAM__output_SAM_or_BAM_on_data_207__bam_peak_2968	313	.	2.98238	33.6292	31.383	205	Promoter (<=1kb)	2	12625808	12628619	2812	1	NM_001043074	0	CG17760	CG17760
chr2R	10479918	10480298	Filter_SAM_or_BAM__output_SAM_or_BAM_on_data_207__bam_peak_2694	112	.	1.857	12.9836	11.2014	196	Promoter (<=1kb)	2	10480163	10481886	1724	1	NM_136748	0	CG17765	CG17765
chr2L	10403953	10404181	Filter_SAM_or_BAM__output_SAM_or_BAM_on_data_207__bam_peak_1132	98	.	2.01013	11.6244	9.88083	134	Promoter (<=1kb)	1	10403197	10404021	825	2	NM_001201849	0	CG17768	CG17768
chr3R	7886338	7886807	Filter_SAM_or_BAM__output_SAM_or_BAM_on_data_207__bam_peak_7050	183	.	2.79373	20.2703	18.3066	301	Promoter (<=1kb)	4	7855582	7886733	31152	2	NM_001104235	0	CG17816	CG17816
chr2L	8528937	8529150	Filter_SAM_or_BAM__output_SAM_or_BAM_on_data_207__bam_peak_918	119	.	2.27884	13.7076	11.9059	94	Promoter (<=1kb)	1	8529141	8537932	8792	1	NM_001273335	0	CG17834	CG17834
chr2L	8535681	8536069	Filter_SAM_or_BAM__output_SAM_or_BAM_on_data_207__bam_peak_920	300	.	3.54969	32.2207	30.0024	351	Promoter (<=1kb)	1	8535786	8537932	2147	1	NM_164828	0	CG17834	CG17834
chrX	10367813	10368025	Filter_SAM_or_BAM__output_SAM_or_BAM_on_data_207__bam_peak_10539	73	.	2.3586	9.02965	7.36487	24	Promoter (<=1kb)	6	10368052	10382928	14877	1	NM_001369989	-27	CG17841	CG17841
chr2L	9540052	9540284	Filter_SAM_or_BAM__output_SAM_or_BAM_on_data_207__bam_peak_1017	139	.	2.63288	15.8114	13.9551	131	Promoter (<=1kb)	1	9540523	9542480	1958	1	NM_135450	-239	CG17855	CG17855
chrX	8721519	8721956	Filter_SAM_or_BAM__output_SAM_or_BAM_on_data_207__bam_peak_10413	261	.	5.12649	28.3319	26.1927	172	Promoter (<=1kb)	6	8720520	8721503	984	1	NM_132276	1000	CG1789	CG1789
chrX	493392	493764	Filter_SAM_or_BAM__output_SAM_or_BAM_on_data_207__bam_peak_9613	805	.	6.05417	83.8256	80.5329	835	Promoter (<=1kb)	6	490787	493495	2709	2	NM_130489	0	CG17896	CG17896
chr2R	7655159	7655393	Filter_SAM_or_BAM__output_SAM_or_BAM_on_data_207__bam_peak_2330	223	.	3.50792	24.4159	22.3595	133	Promoter (<=1kb)	2	7651625	7655302	3678	2	NM_136461	0	CG17985	CG17985
chr2R	10142194	10142474	Filter_SAM_or_BAM__output_SAM_or_BAM_on_data_207__bam_peak_2660	405	.	4.11512	43.0107	40.5768	122	Promoter (<=1kb)	2	10142338	10146206	3869	1	NM_136715	0	CG18011	CG18011
chr3R	6345920	6346122	Filter_SAM_or_BAM__output_SAM_or_BAM_on_data_207__bam_peak_6929	52	.	1.7683	6.8594	5.26916	21	Promoter (<=1kb)	4	6346111	6347519	1409	1	NM_141389	0	CG18048	CG18048
chr3L	15835253	15835453	Filter_SAM_or_BAM__output_SAM_or_BAM_on_data_207__bam_peak_5896	54	.	1.79564	7.08735	5.48916	113	Promoter (<=1kb)	3	15833795	15835276	1482	2	NM_001259848	0	CG18081	CG18081
chr3L	18995680	18996040	Filter_SAM_or_BAM__output_SAM_or_BAM_on_data_207__bam_peak_6287	86	.	1.99646	10.3323	8.62639	32	Promoter (<=1kb)	3	18990026	18995809	5784	2	NM_140825	0	CG18135	CG18135
chr3L	18996454	18996917	Filter_SAM_or_BAM__output_SAM_or_BAM_on_data_207__bam_peak_6288	618	.	4.14145	64.6912	61.8223	619	Promoter (<=1kb)	3	18990026	18995809	5784	2	NM_140825	-646	CG18135	CG18135
chr3L	18998306	18998630	Filter_SAM_or_BAM__output_SAM_or_BAM_on_data_207__bam_peak_6289	383	.	3.18554	40.7139	38.3258	145	Promoter (<=1kb)	3	18990026	18998283	8258	2	NM_176346	-24	CG18135	CG18135
chr3R	31669105	31669554	Filter_SAM_or_BAM__output_SAM_or_BAM_on_data_207__bam_peak_9460	155	.	2.60071	17.4369	15.5395	345	Promoter (<=1kb)	4	31669465	31677971	8507	1	NM_143624	0	CG1815	CG1815
chr3L	9719020	9719229	Filter_SAM_or_BAM__output_SAM_or_BAM_on_data_207__bam_peak_5342	110	.	2.27436	12.8467	11.0686	78	Promoter (<=1kb)	3	9717786	9719063	1278	2	NM_001274718	0	CG18178	CG18178
chr2R	18852861	18853537	Filter_SAM_or_BAM__output_SAM_or_BAM_on_data_207__bam_peak_3706	312	.	3.31871	33.4591	31.216	166	Promoter (<=1kb)	2	18851907	18853043	1137	2	NM_137540	0	CG18190	CG18190
chrX	18783393	18783602	Filter_SAM_or_BAM__output_SAM_or_BAM_on_data_207__bam_peak_11293	38	.	2.05938	5.42196	3.89043	120	Promoter (<=1kb)	6	18781265	18783494	2230	2	NM_133096	0	CG18259	CG18259
chrX	18783676	18783959	Filter_SAM_or_BAM__output_SAM_or_BAM_on_data_207__bam_peak_11294	154	.	3.33546	17.3426	15.4474	181	Promoter (<=1kb)	6	18781265	18783494	2230	2	NM_133096	-183	CG18259	CG18259
chr2R	9588819	9589047	Filter_SAM_or_BAM__output_SAM_or_BAM_on_data_207__bam_peak_2575	76	.	1.97857	9.36547	7.68966	195	Promoter (<=1kb)	2	9589050	9590443	1394	1	NM_136660	-3	CG1827	CG1827
chr2R	13409892	13410159	Filter_SAM_or_BAM__output_SAM_or_BAM_on_data_207__bam_peak_3061	98	.	3.23782	11.564	9.82213	155	Promoter (<=1kb)	2	13408042	13409887	1846	2	NM_165983	-6	CG18278	CG18278
chr2R	12138595	12138916	Filter_SAM_or_BAM__output_SAM_or_BAM_on_data_207__bam_peak_2896	501	.	4.57813	52.7705	50.1443	150	Promoter (<=1kb)	2	12138695	12139324	630	1	NM_001273982	0	CG18343	CG18343
chrX	11888180	11888496	Filter_SAM_or_BAM__output_SAM_or_BAM_on_data_207__bam_peak_10681	75	.	2.62731	9.17203	7.50186	183	Promoter (<=1kb)	6	11888352	11889186	835	1	NM_001272545	0	CG1840	CG1840
chr3L	4690642	4690921	Filter_SAM_or_BAM__output_SAM_or_BAM_on_data_207__bam_peak_4880	325	.	4.16343	34.849	32.578	163	Promoter (<=1kb)	3	4688929	4690070	1142	2	NM_139667	-573	CG18418	CG18418
chr3R	11678057	11678257	Filter_SAM_or_BAM__output_SAM_or_BAM_on_data_207__bam_peak_7474	82	.	2.49158	9.94477	8.25102	67	Promoter (<=1kb)	4	11674920	11678116	3197	2	NM_169419	0	CG18476	CG18476
chrX	3173094	3173351	Filter_SAM_or_BAM__output_SAM_or_BAM_on_data_207__bam_peak_9881	179	.	3.37575	19.8659	17.9111	68	Promoter (<=1kb)	6	3172268	3173140	873	2	NM_001297907	0	CG18508	CG18508
chr3R	24360045	24360412	Filter_SAM_or_BAM__output_SAM_or_BAM_on_data_207__bam_peak_8798	696	.	5.73023	72.6775	69.6363	171	Promoter (<=1kb)	4	24358095	24360144	2050	2	NM_142994	0	CG18528	CG18528
chr3R	11980337	11980641	Filter_SAM_or_BAM__output_SAM_or_BAM_on_data_207__bam_peak_7502	571	.	4.31823	59.889	57.121	120	Promoter (<=1kb)	4	11978574	11980390	1817	2	NM_141881	0	CG18547	CG18547
chr3R	12448969	12449474	Filter_SAM_or_BAM__output_SAM_or_BAM_on_data_207__bam_peak_7551	146	.	2.31693	16.552	14.6768	444	Promoter (<=1kb)	4	12449296	12456355	7060	1	NM_141946	0	CG18549	CG18549
chr3R	22375627	22376079	Filter_SAM_or_BAM__output_SAM_or_BAM_on_data_207__bam_peak_8541	856	.	4.33646	89.0272	85.6085	263	Promoter (<=1kb)	4	22375923	22379955	4033	1	NM_142774	0	CG18596	CG18596
chr3R	18301608	18301845	Filter_SAM_or_BAM__output_SAM_or_BAM_on_data_207__bam_peak_8116	246	.	3.15622	26.7365	24.6304	99	Promoter (<=1kb)	4	18300195	18301728	1534	2	NM_142451	0	CG18600	CG18600
chr3R	16986308	16986640	Filter_SAM_or_BAM__output_SAM_or_BAM_on_data_207__bam_peak_8003	241	.	3.84579	26.2526	24.1567	169	Promoter (<=1kb)	4	16983510	16986245	2736	2	NM_001275720	-64	CG18622	CG18622
chr2R	9130441	9130921	Filter_SAM_or_BAM__output_SAM_or_BAM_on_data_207__bam_peak_2508	435	.	3.61798	46.0109	43.5176	777	Promoter (<=1kb)	2	9123304	9131893	8590	2	NM_001201961	972	CG18659	CG18659
chr2R	9131784	9132046	Filter_SAM_or_BAM__output_SAM_or_BAM_on_data_207__bam_peak_2509	239	.	3.69514	26.0419	23.9509	99	Promoter (<=1kb)	2	9123304	9131893	8590	2	NM_001201961	0	CG18659	CG18659
chr2L	8997229	8997752	Filter_SAM_or_BAM__output_SAM_or_BAM_on_data_207__bam_peak_963	266	.	3.41467	28.831	26.6816	351	Promoter (<=1kb)	1	8997605	8998544	940	1	NM_001201814	0	CG18661	CG18661
chr3R	8243814	8244099	Filter_SAM_or_BAM__output_SAM_or_BAM_on_data_207__bam_peak_7096	78	.	2.23413	9.503	7.82256	177	Promoter (<=1kb)	4	8244055	8247855	3801	1	NM_001031983	0	CG18749	CG18749
chr3R	27245046	27245780	Filter_SAM_or_BAM__output_SAM_or_BAM_on_data_207__bam_peak_9065	716	.	6.19484	74.7657	71.6796	631	Promoter (<=1kb)	4	27242335	27245249	2915	2	NM_144400	0	CG18766	CG18766
chrX	19744075	19744462	Filter_SAM_or_BAM__output_SAM_or_BAM_on_data_207__bam_peak_11375	74	.	2.92943	9.15924	7.48954	70	Promoter (<=1kb)	6	19741224	19744335	3112	2	NM_144412	0	CG18809	CG18809
chr3L	11627884	11628214	Filter_SAM_or_BAM__output_SAM_or_BAM_on_data_207__bam_peak_5542	128	.	2.19693	14.6605	12.8337	153	Promoter (<=1kb)	3	11628037	11629992	1956	1	NM_144417	0	CG18815	CG18815
chr2R	7812371	7812847	Filter_SAM_or_BAM__output_SAM_or_BAM_on_data_207__bam_peak_2369	415	.	4.19829	43.9812	41.5281	181	Promoter (<=1kb)	2	7812504	7814745	2242	1	NM_136482	0	CG1882	CG1882
chr2R	9546700	9546710	Filter_SAM_or_BAM__output_SAM_or_BAM_on_data_207__bam_peak_2565	123	.	2.56066	14.2141	12.3988	228	Promoter (<=1kb)	2	9541947	9546958	5012	2	NM_001273899	248	CG1888	CG1888
chr2R	9547046	9547212	Filter_SAM_or_BAM__output_SAM_or_BAM_on_data_207__bam_peak_2566	270	.	3.32618	29.1673	27.0109	99	Promoter (<=1kb)	2	9545172	9546958	1787	2	NM_136651	-89	CG1888	CG1888
chr3R	31743185	31743692	Filter_SAM_or_BAM__output_SAM_or_BAM_on_data_207__bam_peak_9471	624	.	4.41005	65.2887	62.4066	379	Promoter (<=1kb)	4	31743490	31744248	759	1	NM_143628	0	CG1890	CG1890
chr2R	9593899	9594164	Filter_SAM_or_BAM__output_SAM_or_BAM_on_data_207__bam_peak_2577	145	.	2.5161	16.4718	14.5989	105	Promoter (<=1kb)	2	9594045	9605624	11580	1	NM_136663	0	CG1902	CG1902
chr3R	29618669	29619082	Filter_SAM_or_BAM__output_SAM_or_BAM_on_data_207__bam_peak_9246	322	.	4.00735	34.4965	32.2328	197	Promoter (<=1kb)	4	29619065	29620758	1694	1	NM_143446	0	CG1907	CG1907
chr3R	31747478	31747821	Filter_SAM_or_BAM__output_SAM_or_BAM_on_data_207__bam_peak_9474	276	.	3.52517	29.8	27.631	187	Promoter (<=1kb)	4	31747643	31751894	4252	1	NM_143631	0	CG1910	CG1910
chr3R	31748189	31748801	Filter_SAM_or_BAM__output_SAM_or_BAM_on_data_207__bam_peak_9475	378	.	3.94931	40.2167	37.8384	571	Promoter (<=1kb)	4	31748559	31751894	3336	1	NM_170574	0	CG1910	CG1910
chr3L	1969616	1970260	Filter_SAM_or_BAM__output_SAM_or_BAM_on_data_207__bam_peak_4578	306	.	2.92983	32.9206	30.6887	472	Promoter (<=1kb)	3	1966725	1970079	3355	2	NM_139427	0	CG1927	CG1927
chr3R	7074314	7075056	Filter_SAM_or_BAM__output_SAM_or_BAM_on_data_207__bam_peak_6986	489	.	3.23742	51.5609	48.9584	487	Promoter (<=1kb)	4	7074859	7077791	2933	1	NM_141434	0	CG1943	CG1943
chr3R	29027073	29027327	Filter_SAM_or_BAM__output_SAM_or_BAM_on_data_207__bam_peak_9184	132	.	2.24279	15.0707	13.2334	61	Promoter (<=1kb)	4	29027236	29030938	3703	1	NM_143398	0	CG1951	CG1951
chrX	13413006	13413286	Filter_SAM_or_BAM__output_SAM_or_BAM_on_data_207__bam_peak_10831	528	.	5.56453	55.5658	52.8851	142	Promoter (<=1kb)	6	13409369	13413074	3706	2	NM_132659	0	CG1998	CG1998
chr3R	31977733	31977992	Filter_SAM_or_BAM__output_SAM_or_BAM_on_data_207__bam_peak_9487	250	.	3.32712	27.1991	25.0833	434	Promoter (<=1kb)	4	31978121	31990909	12789	1	NM_143646	-129	CG2003	CG2003
chr3R	31978077	31978236	Filter_SAM_or_BAM__output_SAM_or_BAM_on_data_207__bam_peak_9488	154	.	2.67717	17.354	15.4583	175	Promoter (<=1kb)	4	31978121	31990909	12789	1	NM_143646	0	CG2003	CG2003
chrX	8714607	8714850	Filter_SAM_or_BAM__output_SAM_or_BAM_on_data_207__bam_peak_10412	32	.	1.9506	4.75039	3.24829	78	Promoter (<=1kb)	6	8712472	8714663	2192	2	NM_001272425	0	CG2004	CG2004
chr3R	29489248	29489524	Filter_SAM_or_BAM__output_SAM_or_BAM_on_data_207__bam_peak_9238	67	.	2.6555	8.38747	6.74356	146	Promoter (<=1kb)	4	29489468	29490606	1139	1	NM_001202381	0	CG2006	CG2006
chr3R	5861893	5862224	Filter_SAM_or_BAM__output_SAM_or_BAM_on_data_207__bam_peak_6912	190	.	3.35928	21.0799	19.0978	124	Promoter (<=1kb)	4	5858083	5861902	3820	2	NM_169116	0	CG2017	CG2017
chr3R	5862331	5862616	Filter_SAM_or_BAM__output_SAM_or_BAM_on_data_207__bam_peak_6913	242	.	3.07131	26.3086	24.2114	138	Promoter (<=1kb)	4	5858083	5862405	4323	2	NM_141346	0	CG2017	CG2017
chr3R	5824420	5824731	Filter_SAM_or_BAM__output_SAM_or_BAM_on_data_207__bam_peak_6909	102	.	2.09153	11.9538	10.2005	120	Promoter (<=1kb)	4	5822026	5824504	2479	2	NM_141338	0	CG2023	CG2023
chr3L	2257437	2257770	Filter_SAM_or_BAM__output_SAM_or_BAM_on_data_207__bam_peak_4599	187	.	3.19668	20.7664	18.7912	397	Promoter (<=1kb)	3	2257456	2258922	1467	1	NM_001274393	0	CG2034	CG2034
chrX	7286634	7286839	Filter_SAM_or_BAM__output_SAM_or_BAM_on_data_207__bam_peak_10256	43	.	2.41678	5.86219	4.31075	90	Promoter (<=1kb)	6	7286651	7288117	1467	1	NM_132160	0	CG2059	CG2059
chr2R	7665587	7666084	Filter_SAM_or_BAM__output_SAM_or_BAM_on_data_207__bam_peak_2332	935	.	4.19307	97.1918	93.5803	320	Promoter (<=1kb)	2	7665828	7667343	1516	1	NM_136466	0	CG2064	CG2064
chr2R	7663604	7663944	Filter_SAM_or_BAM__output_SAM_or_BAM_on_data_207__bam_peak_2331	381	.	3.66631	40.5396	38.1549	241	Promoter (<=1kb)	2	7663786	7665269	1484	1	NM_001273858	0	CG2065	CG2065
chrX	11090167	11090411	Filter_SAM_or_BAM__output_SAM_or_BAM_on_data_207__bam_peak_10590	122	.	2.99546	14.0167	12.2068	188	Promoter (<=1kb)	6	11090210	11092098	1889	1	NM_001298178	0	CG2076	CG2076
chr3R	5754692	5754924	Filter_SAM_or_BAM__output_SAM_or_BAM_on_data_207__bam_peak_6900	296	.	3.67698	31.9107	29.6987	99	Promoter (<=1kb)	4	5753318	5754774	1457	2	NM_141325	0	CG2091	CG2091
chrX	8129582	8129981	Filter_SAM_or_BAM__output_SAM_or_BAM_on_data_207__bam_peak_10352	52	.	2.20038	6.83426	5.24469	136	Promoter (<=1kb)	6	8129812	8131783	1972	1	NM_132216	0	CG2116	CG2116
chrX	10595825	10596297	Filter_SAM_or_BAM__output_SAM_or_BAM_on_data_207__bam_peak_10559	79	.	2.34423	9.67265	7.98801	330	Promoter (<=1kb)	6	10596122	10599169	3048	1	NM_132410	0	CG2124	CG2124
chr3L	3034951	3035209	Filter_SAM_or_BAM__output_SAM_or_BAM_on_data_207__bam_peak_4668	129	.	2.51492	14.7681	12.9382	121	Promoter (<=1kb)	3	3035196	3040469	5274	1	NM_001169861	0	CG2162	CG2162
chr3L	3035273	3035580	Filter_SAM_or_BAM__output_SAM_or_BAM_on_data_207__bam_peak_4669	172	.	3.11469	19.2283	17.2884	167	Promoter (<=1kb)	3	3035196	3040469	5274	1	NM_139503	78	CG2162	CG2162
chrX	10857326	10857748	Filter_SAM_or_BAM__output_SAM_or_BAM_on_data_207__bam_peak_10587	99	.	3.14631	11.7454	9.99812	88	Promoter (<=1kb)	6	10857655	10866246	8592	1	NM_001272504	0	CG2186	CG2186
chr3L	1342144	1342575	Filter_SAM_or_BAM__output_SAM_or_BAM_on_data_207__bam_peak_4501	67	.	1.99744	8.37405	6.73096	317	Promoter (<=1kb)	3	1339460	1342165	2706	2	NM_001274323	0	CG2199	CG2199
chr2L	21623517	21623821	Filter_SAM_or_BAM__output_SAM_or_BAM_on_data_207__bam_peak_2040	270	.	2.87617	29.1702	27.0138	189	Promoter (<=1kb)	1	21614766	21623627	8862	2	NM_165386	0	CG2201	CG2201
chr2L	21623935	21624270	Filter_SAM_or_BAM__output_SAM_or_BAM_on_data_207__bam_peak_2040	270	.	2.87617	29.1702	27.0138	189	Promoter (<=1kb)	1	21614766	21624080	9315	2	NM_001299196	0	CG2201	CG2201
chr3L	1334536	1335051	Filter_SAM_or_BAM__output_SAM_or_BAM_on_data_207__bam_peak_4497	234	.	2.84275	25.5201	23.4399	424	Promoter (<=1kb)	3	1333239	1334576	1338	2	NM_001274322	0	CG2211	CG2211
chr3L	1335118	1335152	Filter_SAM_or_BAM__output_SAM_or_BAM_on_data_207__bam_peak_4498	783	.	4.95626	81.6317	78.3892	367	Promoter (<=1kb)	3	1333239	1335359	2121	2	NM_138258	207	CG2211	CG2211
chr3L	1336148	1336618	Filter_SAM_or_BAM__output_SAM_or_BAM_on_data_207__bam_peak_4499	479	.	3.66969	50.5782	47.9943	428	Promoter (<=1kb)	3	1333239	1335359	2121	2	NM_138258	-790	CG2211	CG2211
chr3R	30459149	30459392	Filter_SAM_or_BAM__output_SAM_or_BAM_on_data_207__bam_peak_9349	155	.	2.48884	17.4002	15.5037	94	Promoter (<=1kb)	4	30456441	30459300	2860	2	NM_001276179	0	CG2224	CG2224
chr2L	21676569	21677031	Filter_SAM_or_BAM__output_SAM_or_BAM_on_data_207__bam_peak_2045	259	.	2.78635	28.0865	25.953	176	Promoter (<=1kb)	1	21663806	21677230	13425	2	NM_165392	199	CG2225	CG2225
chr2L	21677549	21678059	Filter_SAM_or_BAM__output_SAM_or_BAM_on_data_207__bam_peak_2046	99	.	1.94468	11.697	9.95095	362	Promoter (<=1kb)	1	21663806	21677530	13725	2	NM_206020	-20	CG2225	CG2225
chrX	8121125	8121345	Filter_SAM_or_BAM__output_SAM_or_BAM_on_data_207__bam_peak_10351	85	.	2.6587	10.2879	8.58377	64	Promoter (<=1kb)	6	8119082	8121147	2066	2	NM_132213	0	CG2260	CG2260
chr3L	1307370	1307581	Filter_SAM_or_BAM__output_SAM_or_BAM_on_data_207__bam_peak_4493	95	.	2.48631	11.2956	9.56131	52	Promoter (<=1kb)	3	1304850	1307418	2569	2	NM_001274319	0	CG2277	CG2277
chr3R	29493169	29493758	Filter_SAM_or_BAM__output_SAM_or_BAM_on_data_207__bam_peak_9240	339	.	4.18557	36.2252	33.9263	263	Promoter (<=1kb)	4	29491524	29493518	1995	2	NM_143437	0	CG2310	CG2310
chr2L	20463311	20463972	Filter_SAM_or_BAM__output_SAM_or_BAM_on_data_207__bam_peak_1922	424	.	4.12671	44.8737	42.4031	137	Promoter (<=1kb)	1	20461585	20463444	1860	2	NM_136193	0	CG2493	CG2493
chr2L	20464403	20464676	Filter_SAM_or_BAM__output_SAM_or_BAM_on_data_207__bam_peak_1923	237	.	3.61923	25.881	23.7934	170	Promoter (<=1kb)	1	20461768	20463444	1677	2	NM_001273701	-960	CG2493	CG2493
chr3R	5547585	5547825	Filter_SAM_or_BAM__output_SAM_or_BAM_on_data_207__bam_peak_6871	111	.	2.88353	12.9015	11.1223	113	Promoter (<=1kb)	4	5539510	5547775	8266	2	NM_001275357	0	CG2519	CG2519
chr3R	7793771	7794338	Filter_SAM_or_BAM__output_SAM_or_BAM_on_data_207__bam_peak_7045	373	.	3.60762	39.7334	37.3648	446	Promoter (<=1kb)	4	7794069	7796599	2531	1	NM_141480	0	CG2641	CG2641
chrX	2713815	2714119	Filter_SAM_or_BAM__output_SAM_or_BAM_on_data_207__bam_peak_9852	162	.	3.86734	18.1303	16.2162	169	Promoter (<=1kb)	6	2711756	2713960	2205	2	NM_130667	0	CG2685	CG2685
chr3R	8027542	8027674	Filter_SAM_or_BAM__output_SAM_or_BAM_on_data_207__bam_peak_7067	254	.	3.17819	27.6154	25.491	136	Promoter (<=1kb)	4	8016452	8027174	10723	2	NM_141504	-369	CG2747	CG2747
chr2R	24962438	24962779	Filter_SAM_or_BAM__output_SAM_or_BAM_on_data_207__bam_peak_4293	710	.	5.42845	74.1589	71.0853	1223	Promoter (<=1kb)	2	24959841	24962590	2750	2	NM_001103981	0	CG2765	CG2765
chr2R	24963278	24963753	Filter_SAM_or_BAM__output_SAM_or_BAM_on_data_207__bam_peak_4293	710	.	5.42845	74.1589	71.0853	1223	Promoter (<=1kb)	2	24959841	24963248	3408	2	NM_001103982	-31	CG2765	CG2765
chr2R	24964101	24964694	Filter_SAM_or_BAM__output_SAM_or_BAM_on_data_207__bam_peak_4293	710	.	5.42845	74.1589	71.0853	1223	Promoter (<=1kb)	2	24959841	24965076	5236	2	NM_138144	382	CG2765	CG2765
chr2R	24964860	24965350	Filter_SAM_or_BAM__output_SAM_or_BAM_on_data_207__bam_peak_4294	314	.	3.41807	33.6572	31.4103	158	Promoter (<=1kb)	2	24959841	24965076	5236	2	NM_138144	0	CG2765	CG2765
chr3R	8007896	8008249	Filter_SAM_or_BAM__output_SAM_or_BAM_on_data_207__bam_peak_7064	63	.	1.68574	7.95476	6.32578	99	Promoter (<=1kb)	4	8005924	8008110	2187	2	NM_141500	0	CG2767	CG2767
chr2R	24948265	24948565	Filter_SAM_or_BAM__output_SAM_or_BAM_on_data_207__bam_peak_4290	424	.	4.56489	44.8953	42.4241	135	Promoter (<=1kb)	2	24946561	24948378	1818	2	NM_138142	0	CG2790	CG2790
chr2L	563952	564240	Filter_SAM_or_BAM__output_SAM_or_BAM_on_data_207__bam_peak_104	92	.	2.02734	10.9701	9.24566	122	Promoter (<=1kb)	1	564163	566472	2310	1	NM_134689	0	CG2794	CG2794
chr2R	24940479	24940665	Filter_SAM_or_BAM__output_SAM_or_BAM_on_data_207__bam_peak_4287	135	.	2.62667	15.4446	13.5974	189	Promoter (<=1kb)	2	24939706	24940483	778	2	NM_001259585	0	CG2811	CG2811
chr2L	3712727	3713512	Filter_SAM_or_BAM__output_SAM_or_BAM_on_data_207__bam_peak_409	316	.	3.05519	33.8798	31.628	544	Promoter (<=1kb)	1	3713360	3716810	3451	1	NM_134960	0	CG2818	CG2818
chr2R	22646179	22646551	Filter_SAM_or_BAM__output_SAM_or_BAM_on_data_207__bam_peak_4053	565	.	3.84016	59.2633	56.5076	181	Promoter (<=1kb)	2	22644646	22646344	1699	2	NM_166539	0	CG2852	CG2852
chr2L	2769955	2770220	Filter_SAM_or_BAM__output_SAM_or_BAM_on_data_207__bam_peak_294	272	.	3.25804	29.4306	27.2689	106	Promoter (<=1kb)	1	2770135	2770808	674	1	NM_001273035	0	CG2862	CG2862
chrX	2293267	2293658	Filter_SAM_or_BAM__output_SAM_or_BAM_on_data_207__bam_peak_9800	189	.	3.96797	20.8793	18.9017	359	Promoter (<=1kb)	6	2278031	2293411	15381	2	NM_001272255	0	CG2865	CG2865
chrX	3573564	3573776	Filter_SAM_or_BAM__output_SAM_or_BAM_on_data_207__bam_peak_9921	61	.	2.18377	7.80441	6.17952	38	Promoter (<=1kb)	6	3571456	3573622	2167	2	NM_001272290	0	CG2875	CG2875
chrX	10474609	10474917	Filter_SAM_or_BAM__output_SAM_or_BAM_on_data_207__bam_peak_10542	130	.	3.45156	14.875	13.0427	161	Promoter (<=1kb)	6	10474716	10477201	2486	1	NM_001258686	0	CG2889	CG2889
chrX	3827631	3828102	Filter_SAM_or_BAM__output_SAM_or_BAM_on_data_207__bam_peak_9962	211	.	3.71975	23.1927	21.1631	346	Promoter (<=1kb)	6	3828197	3831546	3350	1	NM_130721	-95	CG2901	CG2901
chr2R	7955899	7956215	Filter_SAM_or_BAM__output_SAM_or_BAM_on_data_207__bam_peak_2386	59	.	1.90227	7.54025	5.9253	173	Promoter (<=1kb)	2	7956150	7958254	2105	1	NM_001103755	0	CG2906	CG2906
chr3R	5623108	5623378	Filter_SAM_or_BAM__output_SAM_or_BAM_on_data_207__bam_peak_6882	90	.	1.90865	10.7875	9.06786	173	Promoter (<=1kb)	4	5622119	5623151	1033	2	NM_141302	0	CG2911	CG2911
chr3R	5624009	5624553	Filter_SAM_or_BAM__output_SAM_or_BAM_on_data_207__bam_peak_6883	396	.	4.3254	42.1017	39.6858	219	Promoter (<=1kb)	4	5622119	5624125	2007	2	NM_001104219	0	CG2911	CG2911
chr2R	7959683	7960068	Filter_SAM_or_BAM__output_SAM_or_BAM_on_data_207__bam_peak_2387	43	.	1.84571	5.88016	4.32785	261	Promoter (<=1kb)	2	7958207	7960015	1809	2	NM_136494	0	CG2915	CG2915
chrX	2274880	2275124	Filter_SAM_or_BAM__output_SAM_or_BAM_on_data_207__bam_peak_9798	234	.	3.69542	25.5387	23.4583	87	Promoter (<=1kb)	6	2271285	2275068	3784	2	NM_130639	0	CG2918	CG2918
chrX	2270400	2270464	Filter_SAM_or_BAM__output_SAM_or_BAM_on_data_207__bam_peak_9796	62	.	2.54661	7.84568	6.21978	118	Promoter (<=1kb)	6	2264657	2270761	6105	2	NM_001297890	297	CG2924	CG2924
chrX	2270668	2271022	Filter_SAM_or_BAM__output_SAM_or_BAM_on_data_207__bam_peak_9797	444	.	5.2369	46.9996	44.4868	173	Promoter (<=1kb)	6	2264657	2270761	6105	2	NM_001297890	0	CG2924	CG2924
chr3R	5588265	5588507	Filter_SAM_or_BAM__output_SAM_or_BAM_on_data_207__bam_peak_6875	257	.	3.73183	27.8896	25.7597	143	Promoter (<=1kb)	4	5579301	5588380	9080	2	NM_001275360	0	CG2926	CG2926
chrX	3868089	3869184	Filter_SAM_or_BAM__output_SAM_or_BAM_on_data_207__bam_peak_9966	357	.	4.19657	38.0919	35.7565	865	Promoter (<=1kb)	6	3868973	3878817	9845	1	NM_001297917	0	CG2930	CG2930
chrX	10009884	10010368	Filter_SAM_or_BAM__output_SAM_or_BAM_on_data_207__bam_peak_10522	67	.	2.40423	8.43264	6.78672	81	Promoter (<=1kb)	6	10010481	10014279	3799	1	NM_001103463	-113	CG2990	CG2990
chr2L	2856954	2857302	Filter_SAM_or_BAM__output_SAM_or_BAM_on_data_207__bam_peak_300	315	.	3.05978	33.7595	31.5103	186	Promoter (<=1kb)	1	2857164	2868548	11385	1	NM_134881	0	CG2991	CG2991
chr2L	2858097	2858450	Filter_SAM_or_BAM__output_SAM_or_BAM_on_data_207__bam_peak_301	1283	.	5.7177	132.882	128.394	206	Promoter (<=1kb)	1	2857164	2868548	11385	1	NM_164509	934	CG2991	CG2991
chr2L	2862054	2862240	Filter_SAM_or_BAM__output_SAM_or_BAM_on_data_207__bam_peak_302	175	.	2.86182	19.4596	17.5144	74	Promoter (<=1kb)	1	2862537	2868548	6012	1	NM_164510	-297	CG2991	CG2991
chr2R	9822844	9823099	Filter_SAM_or_BAM__output_SAM_or_BAM_on_data_207__bam_peak_2596	116	.	2.24756	13.4499	11.6554	62	Promoter (<=1kb)	2	9821168	9822955	1788	2	NM_165697	0	CG30001	CG30001
chr2R	9863421	9863724	Filter_SAM_or_BAM__output_SAM_or_BAM_on_data_207__bam_peak_2607	146	.	2.80939	16.5192	14.6448	125	Promoter (<=1kb)	2	9863564	9864576	1013	1	NM_001273907	0	CG30010	CG30010
chr2R	10874505	10875000	Filter_SAM_or_BAM__output_SAM_or_BAM_on_data_207__bam_peak_2742	430	.	3.49856	45.4961	43.0126	253	Promoter (<=1kb)	2	10839102	10874771	35670	2	NM_001103792	0	CG30015	CG30015
chr2R	10886612	10886898	Filter_SAM_or_BAM__output_SAM_or_BAM_on_data_207__bam_peak_2744	102	.	2.4842	11.9702	10.2163	113	Promoter (<=1kb)	2	10886810	10892787	5978	1	NM_001273946	0	CG30020	CG30020
chr2R	11388291	11388967	Filter_SAM_or_BAM__output_SAM_or_BAM_on_data_207__bam_peak_2813	279	.	2.71553	30.153	27.9766	461	Promoter (<=1kb)	2	11387160	11388779	1620	2	NM_165830	0	CG30022	CG30022
chr2R	14185148	14185701	Filter_SAM_or_BAM__output_SAM_or_BAM_on_data_207__bam_peak_3166	822	.	5.92525	85.5794	82.2434	215	Promoter (<=1kb)	2	14185204	14198368	13165	1	NM_137093	0	CG30069	CG30069
chr2L	4882922	4883298	Filter_SAM_or_BAM__output_SAM_or_BAM_on_data_207__bam_peak_492	73	.	2.33559	8.99268	7.32958	207	Promoter (<=1kb)	1	4883298	4885669	2372	1	NM_135027	0	CG3008	CG3008
chrX	4666985	4667398	Filter_SAM_or_BAM__output_SAM_or_BAM_on_data_207__bam_peak_10013	333	.	5.18746	35.6052	33.3192	291	Promoter (<=1kb)	6	4658577	4666700	8124	2	NM_001169194	-286	CG3009	CG3009
chr2R	16322118	16322333	Filter_SAM_or_BAM__output_SAM_or_BAM_on_data_207__bam_peak_3394	156	.	2.66282	17.5138	15.6144	54	Promoter (<=1kb)	2	16320815	16322124	1310	2	NM_166162	0	CG30096	CG30096
chr2R	17492945	17493257	Filter_SAM_or_BAM__output_SAM_or_BAM_on_data_207__bam_peak_3538	211	.	4.06201	23.1389	21.1104	130	Promoter (<=1kb)	2	17493695	17495998	2304	1	NM_166233	-438	CG30103	CG30103
chr2R	17669959	17670179	Filter_SAM_or_BAM__output_SAM_or_BAM_on_data_207__bam_peak_3555	87	.	2.19109	10.4276	8.71856	136	Promoter (<=1kb)	2	17670082	17670748	667	1	NM_166244	0	CG30109	CG30109
chr2R	18446382	18446724	Filter_SAM_or_BAM__output_SAM_or_BAM_on_data_207__bam_peak_3642	156	.	2.51987	17.5036	15.6046	186	Promoter (<=1kb)	2	18446548	18449420	2873	1	NM_166290	0	CG30120	CG30120
chr2R	18639086	18639449	Filter_SAM_or_BAM__output_SAM_or_BAM_on_data_207__bam_peak_3664	237	.	2.97059	25.8008	23.7147	191	Promoter (<=1kb)	2	18632328	18639270	6943	2	NM_001169725	0	CG30122	CG30122
chr2R	6985605	6986003	Filter_SAM_or_BAM__output_SAM_or_BAM_on_data_207__bam_peak_2251	382	.	4.03311	40.6395	38.2529	146	Promoter (<=1kb)	2	6981446	6985712	4267	2	NM_001273823	0	CG30156	CG30156
chr2R	6992519	6993090	Filter_SAM_or_BAM__output_SAM_or_BAM_on_data_207__bam_peak_2254	548	.	4.03958	57.5562	54.8368	332	Promoter (<=1kb)	2	6992681	6994306	1626	1	NM_001169598	0	CG30159	CG30159
chr2R	24664288	24664528	Filter_SAM_or_BAM__output_SAM_or_BAM_on_data_207__bam_peak_4253	179	.	2.60308	19.8598	17.9052	117	Promoter (<=1kb)	2	24663532	24664377	846	2	NM_138109	0	CG30161	CG30161
chr2R	14513342	14514008	Filter_SAM_or_BAM__output_SAM_or_BAM_on_data_207__bam_peak_3205	595	.	5.13209	62.3888	59.5697	164	Promoter (<=1kb)	2	14514030	14514992	963	1	NM_166058	-22	CG30197	CG30197
chr2R	22217123	22217462	Filter_SAM_or_BAM__output_SAM_or_BAM_on_data_207__bam_peak_4011	199	.	2.08681	21.9201	19.9184	173	Promoter (<=1kb)	2	22217405	22218460	1056	2	NM_001299781	998	CG30278	CG30278
chr2R	21535281	21535814	Filter_SAM_or_BAM__output_SAM_or_BAM_on_data_207__bam_peak_3945	563	.	3.56656	59.1475	56.3952	274	Promoter (<=1kb)	2	21535716	21536795	1080	2	NM_001169768	981	CG30286	CG30286
chr2R	21009539	21009748	Filter_SAM_or_BAM__output_SAM_or_BAM_on_data_207__bam_peak_3874	191	.	3.39258	21.1265	19.1434	43	Promoter (<=1kb)	2	21007755	21009576	1822	2	NM_166417	0	CG30291	CG30291
chr2R	17852228	17852549	Filter_SAM_or_BAM__output_SAM_or_BAM_on_data_207__bam_peak_3582	74	.	1.89844	9.15108	7.48218	164	Promoter (<=1kb)	2	17853295	17854296	1002	1	NM_001274135	-746	CG30323	CG30323
chr2R	9145135	9145522	Filter_SAM_or_BAM__output_SAM_or_BAM_on_data_207__bam_peak_2513	394	.	3.62231	41.9025	39.4903	187	Promoter (<=1kb)	2	9145260	9148512	3253	1	NM_165655	0	CG30344	CG30344
chr2R	8907400	8907667	Filter_SAM_or_BAM__output_SAM_or_BAM_on_data_207__bam_peak_2482	165	.	2.88575	18.4591	16.5373	157	Promoter (<=1kb)	2	8907518	8910885	3368	1	NM_136577	0	CG30349	CG30349
chr2R	8164541	8164947	Filter_SAM_or_BAM__output_SAM_or_BAM_on_data_207__bam_peak_2420	103	.	2.6656	12.0605	10.304	146	Promoter (<=1kb)	2	8164000	8164670	671	2	NM_165595	0	CG30373	CG30373
chr2R	7889727	7889994	Filter_SAM_or_BAM__output_SAM_or_BAM_on_data_207__bam_peak_2377	136	.	3.36406	15.5188	13.6697	149	Promoter (<=1kb)	2	7890025	7915032	25008	1	NM_001299242	-31	CG30377	CG30377
chr2R	7940399	7940865	Filter_SAM_or_BAM__output_SAM_or_BAM_on_data_207__bam_peak_2384	872	.	4.21589	90.7205	87.2615	173	Promoter (<=1kb)	2	7939956	7941870	1915	1	NM_165574	444	CG30379	CG30379
chrX	245742	246090	Filter_SAM_or_BAM__output_SAM_or_BAM_on_data_207__bam_peak_9599	182	.	3.2545	20.2109	18.2483	308	Promoter (<=1kb)	6	243954	245856	1903	2	NM_001297803	0	CG3038	CG3038
chr2R	21160403	21160780	Filter_SAM_or_BAM__output_SAM_or_BAM_on_data_207__bam_peak_3897	352	.	3.55725	37.5941	35.2686	178	Promoter (<=1kb)	2	21148733	21160545	11813	2	NM_001274187	0	CG30389	CG30389
chr2R	21161451	21161668	Filter_SAM_or_BAM__output_SAM_or_BAM_on_data_207__bam_peak_3898	79	.	2.03875	9.67088	7.98664	48	Promoter (<=1kb)	2	21148733	21160545	11813	2	NM_137711	-907	CG30389	CG30389
chr2R	21292063	21292359	Filter_SAM_or_BAM__output_SAM_or_BAM_on_data_207__bam_peak_3911	188	.	3.16101	20.8575	18.8802	168	Promoter (<=1kb)	2	21290914	21292181	1268	2	NM_001299743	0	CG30392	CG30392
chr2R	21323184	21323698	Filter_SAM_or_BAM__output_SAM_or_BAM_on_data_207__bam_peak_3919	257	.	3.73183	27.8896	25.7597	164	Promoter (<=1kb)	2	21320040	21323320	3281	2	NM_137734	0	CG30394	CG30394
chrX	6973277	6973667	Filter_SAM_or_BAM__output_SAM_or_BAM_on_data_207__bam_peak_10236	308	.	3.84223	33.1152	30.879	150	Promoter (<=1kb)	6	6972324	6973393	1070	2	NM_132144	0	CG3040	CG3040
chr2R	24875768	24876034	Filter_SAM_or_BAM__output_SAM_or_BAM_on_data_207__bam_peak_4280	153	.	2.61267	17.2707	15.3771	107	Promoter (<=1kb)	2	24874976	24875865	890	2	NM_166691	0	CG30423	CG30423
chr2R	25253165	25253384	Filter_SAM_or_BAM__output_SAM_or_BAM_on_data_207__bam_peak_4323	188	.	2.55603	20.8392	18.8622	95	Promoter (<=1kb)	2	25253314	25254535	1222	1	NM_166709	0	CG30428	CG30428
chr2R	22174616	22174870	Filter_SAM_or_BAM__output_SAM_or_BAM_on_data_207__bam_peak_4003	125	.	2.36719	14.3705	12.5511	135	Promoter (<=1kb)	2	22172803	22174691	1889	2	NM_137802	0	CG3045	CG3045
chr2R	17099977	17100283	Filter_SAM_or_BAM__output_SAM_or_BAM_on_data_207__bam_peak_3487	105	.	2.63641	12.3104	10.5473	172	Promoter (<=1kb)	2	17100241	17107542	7302	1	NM_137344	0	CG30456	CG30456
chr2R	17101002	17101107	Filter_SAM_or_BAM__output_SAM_or_BAM_on_data_207__bam_peak_3488	63	.	1.84921	7.93344	6.305	116	Promoter (<=1kb)	2	17100241	17107542	7302	1	NM_137344	762	CG30456	CG30456
chr2R	15568896	15569125	Filter_SAM_or_BAM__output_SAM_or_BAM_on_data_207__bam_peak_3295	123	.	2.64982	14.12	12.3077	131	Promoter (<=1kb)	2	15568960	15573170	4211	1	NM_001299534	0	CG30466	CG30466
chr2R	15537789	15538301	Filter_SAM_or_BAM__output_SAM_or_BAM_on_data_207__bam_peak_3292	723	.	4.9603	75.4037	72.3033	192	Promoter (<=1kb)	2	15538175	15540014	1840	1	NM_137200	0	CG30467	CG30467
chr2R	7698894	7699528	Filter_SAM_or_BAM__output_SAM_or_BAM_on_data_207__bam_peak_2340	510	.	4.26412	53.6975	51.0533	150	Promoter (<=1kb)	2	7699500	7701878	2379	1	NM_165551	0	CG30496	CG30496
chr2L	2765444	2765760	Filter_SAM_or_BAM__output_SAM_or_BAM_on_data_207__bam_peak_292	209	.	3.09363	23.0155	20.9897	729	Promoter (<=1kb)	1	2763416	2765665	2250	2	NM_001273033	0	CG3077	CG3077
chr2R	23074571	23075007	Filter_SAM_or_BAM__output_SAM_or_BAM_on_data_207__bam_peak_4085	192	.	2.44754	21.2864	19.2993	175	Promoter (<=1kb)	2	23074823	23076857	2035	1	NM_001274220	0	CG3085	CG3085
chr3R	30601787	30602065	Filter_SAM_or_BAM__output_SAM_or_BAM_on_data_207__bam_peak_9369	372	.	3.8567	39.6458	37.2786	152	Promoter (<=1kb)	4	30602206	30604041	1836	1	NM_170513	-141	CG31021	CG31021
chr3R	29876778	29877421	Filter_SAM_or_BAM__output_SAM_or_BAM_on_data_207__bam_peak_9289	916	.	5.6073	95.2389	91.6731	353	Promoter (<=1kb)	4	29877059	29898793	21735	1	NM_170448	0	CG31038	CG31038
chr2L	2855599	2855832	Filter_SAM_or_BAM__output_SAM_or_BAM_on_data_207__bam_peak_299	286	.	3.64518	30.8271	28.6372	94	Promoter (<=1kb)	1	2848989	2855778	6790	2	NM_134880	0	CG3104	CG3104
chr3R	27238894	27239270	Filter_SAM_or_BAM__output_SAM_or_BAM_on_data_207__bam_peak_9063	107	.	2.44156	12.5465	10.7767	233	Promoter (<=1kb)	4	27229505	27239085	9581	2	NM_170324	0	CG31064	CG31064
chr2R	5090414	5090766	Filter_SAM_or_BAM__output_SAM_or_BAM_on_data_207__bam_peak_2111	99	.	2.7791	11.6973	9.95124	140	Promoter (<=1kb)	2	5090581	5095090	4510	1	NM_136312	0	CG3107	CG3107
chr3R	26988195	26988420	Filter_SAM_or_BAM__output_SAM_or_BAM_on_data_207__bam_peak_9036	21	.	1.50248	3.59843	2.15382	215	Promoter (<=1kb)	4	26985624	26988517	2894	2	NM_170304	97	CG31075	CG31075
chr3R	26988489	26988999	Filter_SAM_or_BAM__output_SAM_or_BAM_on_data_207__bam_peak_9037	180	.	2.47119	20.0347	18.0763	427	Promoter (<=1kb)	4	26985624	26988517	2894	2	NM_170304	0	CG31075	CG31075
chr3R	25292794	25293333	Filter_SAM_or_BAM__output_SAM_or_BAM_on_data_207__bam_peak_8881	839	.	6.63137	87.2778	83.9019	233	Promoter (<=1kb)	4	25291370	25292977	1608	2	NM_170212	0	CG31098	CG31098
chr3R	25054499	25054910	Filter_SAM_or_BAM__output_SAM_or_BAM_on_data_207__bam_peak_8859	134	.	2.32894	15.2669	13.4244	247	Promoter (<=1kb)	4	25053369	25054653	1285	2	NM_001276017	0	CG31109	CG31109
chr3R	25056017	25056246	Filter_SAM_or_BAM__output_SAM_or_BAM_on_data_207__bam_peak_8860	71	.	1.89061	8.83513	7.17594	138	Promoter (<=1kb)	4	25055076	25056177	1102	2	NM_170195	0	CG31111	CG31111
chr3R	18412343	18413288	Filter_SAM_or_BAM__output_SAM_or_BAM_on_data_207__bam_peak_8125	208	.	3.2212	22.8789	20.856	130	Promoter (<=1kb)	4	18406631	18412874	6244	2	NM_001170176	0	CG31122	CG31122
chr3R	24659464	24659703	Filter_SAM_or_BAM__output_SAM_or_BAM_on_data_207__bam_peak_8825	248	.	3.12384	26.9537	24.8428	107	Promoter (<=1kb)	4	24659621	24660265	645	1	NM_170162	0	CG31126	CG31126
chr3R	23669411	23669826	Filter_SAM_or_BAM__output_SAM_or_BAM_on_data_207__bam_peak_8686	323	.	4.14233	34.6529	32.3858	188	Promoter (<=1kb)	4	23605751	23669659	63909	2	NM_001144629	0	CG31145	CG31145
chr3R	21719558	21719877	Filter_SAM_or_BAM__output_SAM_or_BAM_on_data_207__bam_peak_8486	206	.	3.5894	22.6928	20.674	248	Promoter (<=1kb)	4	21672303	21719660	47358	2	NM_169963	0	CG31176	CG31176
chr3R	20762272	20762473	Filter_SAM_or_BAM__output_SAM_or_BAM_on_data_207__bam_peak_8332	45	.	1.70237	6.15998	4.5968	66	Promoter (<=1kb)	4	20757269	20762369	5101	2	NM_169923	0	CG31195	CG31195
chr3R	19648316	19648531	Filter_SAM_or_BAM__output_SAM_or_BAM_on_data_207__bam_peak_8240	118	.	3.02824	13.6569	11.8564	114	Promoter (<=1kb)	4	19648487	19650586	2100	1	NM_169868	0	CG31220	CG31220
chr3R	18659014	18659795	Filter_SAM_or_BAM__output_SAM_or_BAM_on_data_207__bam_peak_8154	549	.	3.71363	57.6624	54.9398	656	Promoter (<=1kb)	4	18650121	18659309	9189	2	NM_001300467	0	CG31224	CG31224
chr3R	18667651	18667903	Filter_SAM_or_BAM__output_SAM_or_BAM_on_data_207__bam_peak_8156	91	.	2.25892	10.8519	9.13021	97	Promoter (<=1kb)	4	18667852	18669083	1232	1	NM_169828	0	CG31229	CG31229
chr3R	17686927	17687154	Filter_SAM_or_BAM__output_SAM_or_BAM_on_data_207__bam_peak_8053	184	.	2.95363	20.4072	18.4403	129	Promoter (<=1kb)	4	17685689	17687071	1383	2	NM_169774	0	CG31249	CG31249
chr3R	10708212	10708414	Filter_SAM_or_BAM__output_SAM_or_BAM_on_data_207__bam_peak_7386	121	.	2.72972	13.9951	12.1859	115	Promoter (<=1kb)	4	10707398	10708340	943	2	NM_001300344	0	CG31278	CG31278
chr3R	16431711	16431975	Filter_SAM_or_BAM__output_SAM_or_BAM_on_data_207__bam_peak_7966	482	.	4.20341	50.799	48.2109	85	Promoter (<=1kb)	4	16432197	16432897	701	1	NM_001275704	-222	CG31279	CG31279
chr3R	15346043	15346300	Filter_SAM_or_BAM__output_SAM_or_BAM_on_data_207__bam_peak_7836	170	.	3.26219	18.9881	17.0541	77	Promoter (<=1kb)	4	15346205	15348012	1808	1	NM_142192	0	CG31301	CG31301
chr3R	26106793	26107166	Filter_SAM_or_BAM__output_SAM_or_BAM_on_data_207__bam_peak_8958	492	.	5.59055	51.8803	49.2716	344	Promoter (<=1kb)	4	26106868	26130190	23323	1	NM_170259	0	CG31324	CG31324
chr3R	26129675	26129946	Filter_SAM_or_BAM__output_SAM_or_BAM_on_data_207__bam_peak_8964	132	.	2.87162	15.1317	13.2927	165	Promoter (<=1kb)	4	26128804	26130190	1387	1	NM_001276055	872	CG31324	CG31324
chr3R	12985856	12986148	Filter_SAM_or_BAM__output_SAM_or_BAM_on_data_207__bam_peak_7592	42	.	1.75067	5.84365	4.29355	152	Promoter (<=1kb)	4	12986041	12991543	5503	1	NM_001104293	0	CG31342	CG31342
chr3R	15225291	15225712	Filter_SAM_or_BAM__output_SAM_or_BAM_on_data_207__bam_peak_7815	325	.	3.16478	34.8202	32.5498	249	Promoter (<=1kb)	4	15223378	15225329	1952	2	NM_142176	0	CG31344	CG31344
chr3R	24829897	24830146	Filter_SAM_or_BAM__output_SAM_or_BAM_on_data_207__bam_peak_8843	61	.	2.15031	7.77361	6.14997	242	Promoter (<=1kb)	4	24828279	24829959	1681	2	NM_170171	0	CG31357	CG31357
chr3R	11882497	11882810	Filter_SAM_or_BAM__output_SAM_or_BAM_on_data_207__bam_peak_7495	82	.	2.2822	9.90221	8.2096	243	Promoter (<=1kb)	4	11882790	11892382	9593	1	NM_169439	0	CG31368	CG31368
chr3R	25302299	25302614	Filter_SAM_or_BAM__output_SAM_or_BAM_on_data_207__bam_peak_8882	225	.	3.02441	24.5785	22.5185	164	Promoter (<=1kb)	4	25302464	25303986	1523	1	NM_170216	0	CG31370	CG31370
chr3R	11237669	11237978	Filter_SAM_or_BAM__output_SAM_or_BAM_on_data_207__bam_peak_7427	42	.	1.86785	5.83868	4.28892	224	Promoter (<=1kb)	4	11237815	11240114	2300	1	NM_001260113	0	CG31388	CG31388
chr3R	25303915	25304317	Filter_SAM_or_BAM__output_SAM_or_BAM_on_data_207__bam_peak_8883	589	.	3.50029	61.7267	58.9208	193	Promoter (<=1kb)	4	25304137	25305651	1515	1	NM_170217	0	CG31436	CG31436
chr3R	23127849	23128164	Filter_SAM_or_BAM__output_SAM_or_BAM_on_data_207__bam_peak_8619	221	.	2.71297	24.1675	22.1162	165	Promoter (<=1kb)	4	23126581	23127981	1401	2	NM_170051	0	CG31457	CG31457
chr3R	8562385	8562797	Filter_SAM_or_BAM__output_SAM_or_BAM_on_data_207__bam_peak_7130	118	.	2.7067	13.6473	11.8472	355	Promoter (<=1kb)	4	8562673	8563445	773	1	NM_001300307	0	CG31460	CG31460
chr3R	25122453	25122664	Filter_SAM_or_BAM__output_SAM_or_BAM_on_data_207__bam_peak_8867	58	.	1.8899	7.49496	5.88127	166	Promoter (<=1kb)	4	25117218	25122920	5703	2	NM_170203	256	CG31510	CG31510
chr3R	4453224	4454058	Filter_SAM_or_BAM__output_SAM_or_BAM_on_data_207__bam_peak_6758	274	.	3.18705	29.5845	27.4199	806	Promoter (<=1kb)	4	4441950	4453316	11367	2	NM_001259976	0	CG31522	CG31522
chr3R	4478191	4478534	Filter_SAM_or_BAM__output_SAM_or_BAM_on_data_207__bam_peak_6760	22	.	1.50102	3.72052	2.27029	154	Promoter (<=1kb)	4	4465421	4478849	13429	2	NM_169008	315	CG31523	CG31523
chr3R	4479552	4479893	Filter_SAM_or_BAM__output_SAM_or_BAM_on_data_207__bam_peak_6761	432	.	4.65294	45.7884	43.2996	145	Promoter (<=1kb)	4	4465421	4479207	13787	2	NM_169006	-346	CG31523	CG31523
chr2L	22043700	22044034	Filter_SAM_or_BAM__output_SAM_or_BAM_on_data_207__bam_peak_2064	493	.	4.06136	51.9819	49.3713	185	Promoter (<=1kb)	1	22040727	22043877	3151	2	NM_001259201	0	CG31601	CG31601
chr2L	21794570	21795879	Filter_SAM_or_BAM__output_SAM_or_BAM_on_data_207__bam_peak_2052	683	.	4.31616	71.3473	68.3352	918	Promoter (<=1kb)	1	21762314	21795447	33134	2	NM_001169571	0	CG31612	CG31612
chr2L	21236670	21236942	Filter_SAM_or_BAM__output_SAM_or_BAM_on_data_207__bam_peak_2013	154	.	2.36523	17.346	15.4507	208	Promoter (<=1kb)	1	21232495	21236733	4239	2	NM_165362	0	CG31626	CG31626
chr2R	24029147	24029435	Filter_SAM_or_BAM__output_SAM_or_BAM_on_data_207__bam_peak_4192	352	.	3.40578	37.58	35.2546	149	Promoter (<=1kb)	2	24029317	24030555	1239	1	NM_138028	0	CG3163	CG3163
chr2L	6656209	6656562	Filter_SAM_or_BAM__output_SAM_or_BAM_on_data_207__bam_peak_670	201	.	2.50414	22.188	20.1805	94	Promoter (<=1kb)	1	6654760	6656321	1562	2	NM_164698	0	CG31633	CG31633
chr2L	6498377	6498828	Filter_SAM_or_BAM__output_SAM_or_BAM_on_data_207__bam_peak_651	320	.	4.07638	34.3197	32.0595	275	Promoter (<=1kb)	1	6498647	6526919	28273	1	NM_001298748	0	CG31637	CG31637
chr2L	128149	128360	Filter_SAM_or_BAM__output_SAM_or_BAM_on_data_207__bam_peak_20	36	.	1.71417	5.12212	3.60257	66	Promoter (<=1kb)	1	122624	129245	6622	2	NM_001038776	885	CG3164	CG3164
chr2L	128417	128713	Filter_SAM_or_BAM__output_SAM_or_BAM_on_data_207__bam_peak_21	184	.	2.48949	20.4409	18.4731	114	Promoter (<=1kb)	1	122624	129245	6622	2	NM_001038776	532	CG3164	CG3164
chr2L	129024	129580	Filter_SAM_or_BAM__output_SAM_or_BAM_on_data_207__bam_peak_22	1068	.	5.73202	110.755	106.81	326	Promoter (<=1kb)	1	122624	129245	6622	2	NM_001038776	0	CG3164	CG3164
chr2L	131191	131563	Filter_SAM_or_BAM__output_SAM_or_BAM_on_data_207__bam_peak_23	29	.	1.52925	4.47876	2.98894	251	Promoter (<=1kb)	1	122624	130791	8168	2	NM_205881	-401	CG3164	CG3164
chr2L	6037915	6038125	Filter_SAM_or_BAM__output_SAM_or_BAM_on_data_207__bam_peak_611	148	.	3.30383	16.6897	14.8108	111	Promoter (<=1kb)	1	6038117	6041187	3071	1	NM_001298723	0	CG31643	CG31643
chr2L	5526859	5527081	Filter_SAM_or_BAM__output_SAM_or_BAM_on_data_207__bam_peak_570	141	.	2.47582	16.0084	14.1466	84	Promoter (<=1kb)	1	5526957	5527854	898	1	NM_164644	0	CG31648	CG31648
chr2L	2976876	2977218	Filter_SAM_or_BAM__output_SAM_or_BAM_on_data_207__bam_peak_323	112	.	2.19518	13.0355	11.2518	180	Promoter (<=1kb)	1	2977122	2978398	1277	1	NM_001298642	0	CG3165	CG3165
chr2L	20831131	20831559	Filter_SAM_or_BAM__output_SAM_or_BAM_on_data_207__bam_peak_1955	458	.	2.83135	48.4246	45.8832	261	Promoter (<=1kb)	1	20831262	20832859	1598	1	NM_001299182	0	CG31674	CG31674
chr2L	20675939	20676198	Filter_SAM_or_BAM__output_SAM_or_BAM_on_data_207__bam_peak_1930	70	.	2.01288	8.69646	7.04275	140	Promoter (<=1kb)	1	20659132	20675941	16810	2	NM_165336	0	CG31678	CG31678
chr2L	20428654	20429368	Filter_SAM_or_BAM__output_SAM_or_BAM_on_data_207__bam_peak_1921	451	.	3.99697	47.7111	45.1841	191	Promoter (<=1kb)	1	20429025	20443944	14920	1	NM_001144371	0	CG31688	CG31688
chr2L	2724519	2724746	Filter_SAM_or_BAM__output_SAM_or_BAM_on_data_207__bam_peak_279	416	.	4.08307	44.0551	41.6004	169	Promoter (<=1kb)	1	2725674	2739830	14157	1	NM_001273025	-928	CG31689	CG31689
chr2L	2874251	2875054	Filter_SAM_or_BAM__output_SAM_or_BAM_on_data_207__bam_peak_307	267	.	3.50634	28.8894	26.7389	641	Promoter (<=1kb)	1	2868627	2874489	5863	2	NM_164511	0	CG31694	CG31694
chr2L	11527985	11528470	Filter_SAM_or_BAM__output_SAM_or_BAM_on_data_207__bam_peak_1210	564	.	4.70071	59.1945	56.4408	176	Promoter (<=1kb)	1	11523021	11528205	5185	2	NM_205965	0	CG31705	CG31705
chr2L	9705821	9706223	Filter_SAM_or_BAM__output_SAM_or_BAM_on_data_207__bam_peak_1042	578	.	5.20026	60.6144	57.8318	162	Promoter (<=1kb)	1	9702442	9705954	3513	2	NM_001273365	0	CG31710	CG31710
chr2L	10341463	10341756	Filter_SAM_or_BAM__output_SAM_or_BAM_on_data_207__bam_peak_1124	154	.	2.23782	17.3365	15.4416	147	Promoter (<=1kb)	1	10341616	10342523	908	1	NM_001273399	0	CG31715	CG31715
chr2L	10250521	10250888	Filter_SAM_or_BAM__output_SAM_or_BAM_on_data_207__bam_peak_1106	332	.	3.20785	35.4864	33.2027	185	Promoter (<=1kb)	1	10250737	10251594	858	1	NM_164902	0	CG31717	CG31717
chr2L	13290640	13290840	Filter_SAM_or_BAM__output_SAM_or_BAM_on_data_207__bam_peak_1366	583	.	3.85387	61.1073	58.3139	163	Promoter (<=1kb)	1	13290910	13301516	10607	1	NM_001298958	-70	CG31729	CG31729
chr2L	13296188	13296515	Filter_SAM_or_BAM__output_SAM_or_BAM_on_data_207__bam_peak_1367	327	.	3.32405	35.0671	32.7918	141	Promoter (<=1kb)	1	13296348	13301668	5321	1	NM_165038	0	CG31729	CG31729
chr2L	16879327	16879606	Filter_SAM_or_BAM__output_SAM_or_BAM_on_data_207__bam_peak_1666	313	.	3.44974	33.6031	31.3573	126	Promoter (<=1kb)	1	16879517	16886319	6803	1	NM_135976	0	CG31743	CG31743
chr2L	12207566	12207821	Filter_SAM_or_BAM__output_SAM_or_BAM_on_data_207__bam_peak_1257	86	.	2.33239	10.3168	8.61182	185	Promoter (<=1kb)	1	12207709	12210008	2300	1	NM_165001	0	CG31759	CG31759
chr2L	19034448	19034780	Filter_SAM_or_BAM__output_SAM_or_BAM_on_data_207__bam_peak_1795	165	.	2.17987	18.5103	16.5876	176	Promoter (<=1kb)	1	19033657	19034576	920	2	NM_165272	0	CG31800	CG31800
chr2L	16857926	16858151	Filter_SAM_or_BAM__output_SAM_or_BAM_on_data_207__bam_peak_1664	451	.	4.87608	47.6555	45.1296	147	Promoter (<=1kb)	1	16853620	16858562	4943	2	NM_001299069	411	CG31809	CG31809
chr2L	16852484	16852518	Filter_SAM_or_BAM__output_SAM_or_BAM_on_data_207__bam_peak_1662	261	.	3.38549	28.2833	26.1452	121	Promoter (<=1kb)	1	16849018	16852368	3351	2	NM_165198	-117	CG31810	CG31810
chr2L	16852731	16852941	Filter_SAM_or_BAM__output_SAM_or_BAM_on_data_207__bam_peak_1663	142	.	3.18268	16.0832	14.2197	69	Promoter (<=1kb)	1	16849018	16852368	3351	2	NM_165198	-364	CG31810	CG31810
chr2L	16729557	16729835	Filter_SAM_or_BAM__output_SAM_or_BAM_on_data_207__bam_peak_1649	204	.	2.75348	22.4491	20.436	176	Promoter (<=1kb)	1	16729777	16731199	1423	1	NM_165179	0	CG31812	CG31812
chr2L	16543270	16543625	Filter_SAM_or_BAM__output_SAM_or_BAM_on_data_207__bam_peak_1617	271	.	2.6975	29.3458	27.1865	177	Promoter (<=1kb)	1	16542546	16543263	718	1	NM_165166	725	CG31816	CG31816
chr2L	10002312	10002838	Filter_SAM_or_BAM__output_SAM_or_BAM_on_data_207__bam_peak_1085	466	.	2.94675	49.1652	46.6097	186	Promoter (<=1kb)	1	9995561	10002736	7176	2	NM_001201836	0	CG31875	CG31875
chr2L	8958123	8958575	Filter_SAM_or_BAM__output_SAM_or_BAM_on_data_207__bam_peak_957	573	.	3.92951	60.0866	57.3147	381	Promoter (<=1kb)	1	8953481	8958113	4633	2	NM_135415	-11	CG31886	CG31886
chr2L	8400264	8400472	Filter_SAM_or_BAM__output_SAM_or_BAM_on_data_207__bam_peak_893	211	.	2.87554	23.146	21.1172	138	Promoter (<=1kb)	1	8400421	8401592	1172	1	NM_164817	0	CG31898	CG31898
chr2L	7027371	7027693	Filter_SAM_or_BAM__output_SAM_or_BAM_on_data_207__bam_peak_711	125	.	2.3815	14.4064	12.5861	171	Promoter (<=1kb)	1	7024829	7027389	2561	2	NM_001298770	0	CG31908	CG31908
chr2L	7258102	7258521	Filter_SAM_or_BAM__output_SAM_or_BAM_on_data_207__bam_peak_742	677	.	5.19347	70.7824	67.782	159	Promoter (<=1kb)	1	7257512	7258198	687	1	NM_164745	591	CG31909	CG31909
chr2L	1491810	1492168	Filter_SAM_or_BAM__output_SAM_or_BAM_on_data_207__bam_peak_173	423	.	4.40562	44.7977	42.3284	172	Promoter (<=1kb)	1	1492295	1493645	1351	1	NM_164418	-127	CG31928	CG31928
chr2L	3872356	3872675	Filter_SAM_or_BAM__output_SAM_or_BAM_on_data_207__bam_peak_433	138	.	2.2412	15.7184	13.8646	143	Promoter (<=1kb)	1	3871271	3872458	1188	2	NM_001273082	0	CG31957	CG31957
chr2L	3785506	3785763	Filter_SAM_or_BAM__output_SAM_or_BAM_on_data_207__bam_peak_419	377	.	4.49698	40.0827	37.7073	106	Promoter (<=1kb)	1	3784947	3785622	676	1	NM_164559	560	CG31960	CG31960
chr4	205844	206163	Filter_SAM_or_BAM__output_SAM_or_BAM_on_data_207__bam_peak_9511	503	.	4.18976	52.9574	50.3276	160	Promoter (<=1kb)	5	196675	205945	9271	2	NM_001258481	0	CG31998	CG31998
chr4	225761	225902	Filter_SAM_or_BAM__output_SAM_or_BAM_on_data_207__bam_peak_9513	79	.	2.02223	9.67207	7.98757	152	Promoter (<=1kb)	5	215009	225956	10948	2	NM_166745	54	CG31999	CG31999
chr4	226020	226098	Filter_SAM_or_BAM__output_SAM_or_BAM_on_data_207__bam_peak_9514	83	.	2.01225	9.99978	8.30459	175	Promoter (<=1kb)	5	215009	225956	10948	2	NM_166745	-65	CG31999	CG31999
chr3L	8807298	8807517	Filter_SAM_or_BAM__output_SAM_or_BAM_on_data_207__bam_peak_5228	110	.	2.68018	12.8004	11.0236	83	Promoter (<=1kb)	3	8807601	8808407	807	1	NM_168296	-84	CG32024	CG32024
chr3L	9092899	9093290	Filter_SAM_or_BAM__output_SAM_or_BAM_on_data_207__bam_peak_5263	476	.	3.39302	50.2404	47.6635	400	Promoter (<=1kb)	3	9093053	9094856	1804	1	NM_168317	0	CG32032	CG32032
chr3L	10660709	10661229	Filter_SAM_or_BAM__output_SAM_or_BAM_on_data_207__bam_peak_5410	126	.	2.0445	14.5226	12.6996	433	Promoter (<=1kb)	3	10640416	10661013	20598	2	NM_168417	0	CG32066	CG32066
chr3L	11064915	11065197	Filter_SAM_or_BAM__output_SAM_or_BAM_on_data_207__bam_peak_5467	146	.	3.03124	16.5729	14.6975	133	Promoter (<=1kb)	3	11062726	11064941	2216	2	NM_140171	0	CG32075	CG32075
chr3L	11825622	11825862	Filter_SAM_or_BAM__output_SAM_or_BAM_on_data_207__bam_peak_5563	184	.	2.93607	20.4103	18.4433	174	Promoter (<=1kb)	3	11824207	11825732	1526	2	NM_168482	0	CG32095	CG32095
chr3L	12399284	12399508	Filter_SAM_or_BAM__output_SAM_or_BAM_on_data_207__bam_peak_5596	76	.	2.00854	9.34983	7.67488	72	Promoter (<=1kb)	3	12393804	12399322	5519	2	NM_140316	0	CG32104	CG32104
chr3L	12861495	12861750	Filter_SAM_or_BAM__output_SAM_or_BAM_on_data_207__bam_peak_5650	72	.	2.87806	8.93007	7.26847	146	Promoter (<=1kb)	3	12857282	12861305	4024	2	NM_168526	-191	CG32107	CG32107
chr3L	12741717	12741937	Filter_SAM_or_BAM__output_SAM_or_BAM_on_data_207__bam_peak_5631	84	.	2.19041	10.1007	8.40162	81	Promoter (<=1kb)	3	12741718	12745154	3437	1	NM_001274850	0	CG32112	CG32112
chr3L	12913822	12914276	Filter_SAM_or_BAM__output_SAM_or_BAM_on_data_207__bam_peak_5652	446	.	3.55561	47.1694	44.6529	303	Promoter (<=1kb)	3	12912027	12913646	1620	2	NM_168529	-177	CG32115	CG32115
chr3L	15143898	15144465	Filter_SAM_or_BAM__output_SAM_or_BAM_on_data_207__bam_peak_5828	239	.	3.63785	26.0452	23.9542	246	Promoter (<=1kb)	3	15143063	15144059	997	2	NM_168616	0	CG32147	CG32147
chr3L	17806447	17806660	Filter_SAM_or_BAM__output_SAM_or_BAM_on_data_207__bam_peak_6135	83	.	2.1301	10.0379	8.3409	143	Promoter (<=1kb)	3	17804916	17806365	1450	2	NM_168749	-83	CG32187	CG32187
chr3L	18112782	18113082	Filter_SAM_or_BAM__output_SAM_or_BAM_on_data_207__bam_peak_6196	42	.	1.65664	5.77737	4.23024	130	Promoter (<=1kb)	3	18112959	18115975	3017	1	NM_001275077	0	CG32195	CG32195
chr3L	18114181	18114629	Filter_SAM_or_BAM__output_SAM_or_BAM_on_data_207__bam_peak_6197	594	.	3.92946	62.2576	59.4405	316	Promoter (<=1kb)	3	18114284	18115975	1692	1	NM_001275078	0	CG32195	CG32195
chr3L	18460857	18461081	Filter_SAM_or_BAM__output_SAM_or_BAM_on_data_207__bam_peak_6215	161	.	3.19753	18.0637	16.1514	79	Promoter (<=1kb)	3	18459464	18461024	1561	2	NM_001275085	0	CG32196	CG32196
chr3L	18461203	18461456	Filter_SAM_or_BAM__output_SAM_or_BAM_on_data_207__bam_peak_6216	274	.	3.95502	29.5905	27.4257	157	Promoter (<=1kb)	3	18459464	18461024	1561	2	NM_168764	-180	CG32196	CG32196
chr3L	3811111	3811368	Filter_SAM_or_BAM__output_SAM_or_BAM_on_data_207__bam_peak_4792	48	.	1.9008	6.46829	4.89304	26	Promoter (<=1kb)	3	3810312	3811114	803	2	NM_168041	0	CG32263	CG32263
chr3L	3765582	3766020	Filter_SAM_or_BAM__output_SAM_or_BAM_on_data_207__bam_peak_4786	934	.	4.85299	97.0446	93.4368	183	Promoter (<=1kb)	3	3717217	3765731	48515	2	NM_001259678	0	CG32264	CG32264
chr3L	3787712	3788034	Filter_SAM_or_BAM__output_SAM_or_BAM_on_data_207__bam_peak_4790	224	.	3.44531	24.5536	22.4941	83	Promoter (<=1kb)	3	3717217	3787960	70744	2	NM_168038	0	CG32264	CG32264
chr3L	3198837	3199350	Filter_SAM_or_BAM__output_SAM_or_BAM_on_data_207__bam_peak_4708	302	.	3.80911	32.5148	30.2908	337	Promoter (<=1kb)	3	3197863	3199047	1185	2	NM_167998	0	CG32276	CG32276
chr3L	3165600	3165855	Filter_SAM_or_BAM__output_SAM_or_BAM_on_data_207__bam_peak_4702	78	.	2.08431	9.48788	7.80781	117	Promoter (<=1kb)	3	3165334	3169080	3747	1	NM_167994	267	CG32280	CG32280
chr3L	2244025	2244455	Filter_SAM_or_BAM__output_SAM_or_BAM_on_data_207__bam_peak_4595	693	.	7.14567	72.3985	69.3633	166	Promoter (<=1kb)	3	2244478	2248614	4137	1	NM_001169856	-23	CG32301	CG32301
chr3L	324598	324883	Filter_SAM_or_BAM__output_SAM_or_BAM_on_data_207__bam_peak_4363	20	.	1.43569	3.50621	2.06748	159	Promoter (<=1kb)	3	321233	324720	3488	2	NM_138184	0	CG32344	CG32344
chr3L	7868697	7869166	Filter_SAM_or_BAM__output_SAM_or_BAM_on_data_207__bam_peak_5109	287	.	2.62095	30.9747	28.7818	294	Promoter (<=1kb)	3	7869042	7894814	25773	1	NM_001300045	0	CG32365	CG32365
chr3L	7915060	7915551	Filter_SAM_or_BAM__output_SAM_or_BAM_on_data_207__bam_peak_5116	329	.	4.08465	35.2523	32.9734	169	Promoter (<=1kb)	3	7915437	7915846	410	1	NM_168244	0	CG32368	CG32368
chr3L	7916149	7916538	Filter_SAM_or_BAM__output_SAM_or_BAM_on_data_207__bam_peak_5117	164	.	2.37554	18.3702	16.4508	151	Promoter (<=1kb)	3	7915437	7915846	410	1	NM_168244	713	CG32368	CG32368
chr3L	7804604	7805065	Filter_SAM_or_BAM__output_SAM_or_BAM_on_data_207__bam_peak_5089	695	.	3.87988	72.5574	69.5191	237	Promoter (<=1kb)	3	7777852	7804675	26824	2	NM_168232	0	CG32369	CG32369
chr3L	7805285	7805774	Filter_SAM_or_BAM__output_SAM_or_BAM_on_data_207__bam_peak_5089	695	.	3.87988	72.5574	69.5191	237	Promoter (<=1kb)	3	7777852	7804675	26824	2	NM_168232	-611	CG32369	CG32369
chr3L	7809666	7810267	Filter_SAM_or_BAM__output_SAM_or_BAM_on_data_207__bam_peak_5091	729	.	5.88388	76.0352	72.9204	280	Promoter (<=1kb)	3	7777105	7809825	32721	2	NM_001259731	0	CG32369	CG32369
chr3L	5922165	5922543	Filter_SAM_or_BAM__output_SAM_or_BAM_on_data_207__bam_peak_4969	1061	.	6.74179	110.057	106.129	274	Promoter (<=1kb)	3	5922476	5923567	1092	1	NM_001274527	0	CG32407	CG32407
chr3L	5899345	5899627	Filter_SAM_or_BAM__output_SAM_or_BAM_on_data_207__bam_peak_4967	83	.	1.83648	10.0337	8.33688	174	Promoter (<=1kb)	3	5899528	5900936	1409	1	NM_168144	0	CG32409	CG32409
chr3L	20497176	20497601	Filter_SAM_or_BAM__output_SAM_or_BAM_on_data_207__bam_peak_6452	140	.	2.78231	15.9358	14.0762	322	Promoter (<=1kb)	3	20497323	20511058	13736	1	NM_001104179	0	CG32425	CG32425
chr3L	20509747	20509985	Filter_SAM_or_BAM__output_SAM_or_BAM_on_data_207__bam_peak_6453	844	.	3.8812	87.821	84.433	708	Promoter (<=1kb)	3	20509900	20511058	1159	1	NM_168862	0	CG32425	CG32425
chr3L	20473274	20473501	Filter_SAM_or_BAM__output_SAM_or_BAM_on_data_207__bam_peak_6448	135	.	2.94831	15.3655	13.5204	54	Promoter (<=1kb)	3	20469674	20473372	3699	2	NM_001202213	0	CG32428	CG32428
chr3L	21359819	21360168	Filter_SAM_or_BAM__output_SAM_or_BAM_on_data_207__bam_peak_6552	303	.	2.92964	32.5534	30.3289	179	Promoter (<=1kb)	3	21360179	21361229	1051	1	NM_168900	-11	CG32440	CG32440
chr3R	13309149	13309487	Filter_SAM_or_BAM__output_SAM_or_BAM_on_data_207__bam_peak_7616	71	.	1.89061	8.83513	7.17594	160	Promoter (<=1kb)	4	13309386	13312785	3400	1	NM_142019	0	CG32473	CG32473
chrX	21280978	21281126	Filter_SAM_or_BAM__output_SAM_or_BAM_on_data_207__bam_peak_11449	217	.	3.8672	23.7502	21.7082	183	Promoter (<=1kb)	6	21205310	21281153	75844	2	NM_001272828	27	CG32521	CG32521
chrX	21281223	21281447	Filter_SAM_or_BAM__output_SAM_or_BAM_on_data_207__bam_peak_11450	406	.	4.51087	43.0712	40.6357	136	Promoter (<=1kb)	6	21207675	21281171	73497	2	NM_167736	-53	CG32521	CG32521
chrX	17852572	17852798	Filter_SAM_or_BAM__output_SAM_or_BAM_on_data_207__bam_peak_11230	172	.	4.17443	19.1691	17.2306	148	Promoter (<=1kb)	6	17851869	17852685	817	2	NM_167580	0	CG32554	CG32554
chrX	16651138	16651448	Filter_SAM_or_BAM__output_SAM_or_BAM_on_data_207__bam_peak_11106	268	.	3.08234	29.005	26.8523	140	Promoter (<=1kb)	6	16651376	16653275	1900	1	NM_167529	0	CG32573	CG32573
chrX	16288387	16288982	Filter_SAM_or_BAM__output_SAM_or_BAM_on_data_207__bam_peak_11057	86	.	2.37192	10.3887	8.68067	473	Promoter (<=1kb)	6	16285953	16288533	2581	2	NM_001014746	0	CG32576	CG32576
chrX	16323012	16323406	Filter_SAM_or_BAM__output_SAM_or_BAM_on_data_207__bam_peak_11063	48	.	2.13655	6.45116	4.87654	61	Promoter (<=1kb)	6	16323286	16325120	1835	1	NM_001272677	0	CG32579	CG32579
chrX	14839047	14839330	Filter_SAM_or_BAM__output_SAM_or_BAM_on_data_207__bam_peak_10916	18	.	1.70258	3.32136	1.89281	115	Promoter (<=1kb)	6	14838352	14839106	755	2	NM_167414	0	CG32590	CG32590
chr2L	22239704	22239963	Filter_SAM_or_BAM__output_SAM_or_BAM_on_data_207__bam_peak_2073	77	.	2.18889	9.44616	7.76731	111	Promoter (<=1kb)	1	22239916	22240881	966	1	NM_165412	0	CG3262	CG3262
chrX	12785016	12785334	Filter_SAM_or_BAM__output_SAM_or_BAM_on_data_207__bam_peak_10764	247	.	3.58738	26.8158	24.7082	149	Promoter (<=1kb)	6	12776572	12784958	8387	2	NM_167338	-59	CG32647	CG32647
chrX	10486350	10486721	Filter_SAM_or_BAM__output_SAM_or_BAM_on_data_207__bam_peak_10544	199	.	4.41783	21.9234	19.9217	136	Promoter (<=1kb)	6	10482028	10486632	4605	2	NM_167233	0	CG32687	CG32687
chrX	9873962	9874311	Filter_SAM_or_BAM__output_SAM_or_BAM_on_data_207__bam_peak_10517	296	.	4.73374	31.8945	29.6832	183	Promoter (<=1kb)	6	9872382	9874057	1676	2	NM_001298136	0	CG32695	CG32695
chrX	9550877	9551133	Filter_SAM_or_BAM__output_SAM_or_BAM_on_data_207__bam_peak_10481	154	.	3.76826	17.3301	15.4355	120	Promoter (<=1kb)	6	9506732	9550838	44107	2	NM_167191	-40	CG32700	CG32700
chrX	5737780	5738499	Filter_SAM_or_BAM__output_SAM_or_BAM_on_data_207__bam_peak_10098	168	.	3.79206	18.7665	16.8378	161	Promoter (<=1kb)	6	5720927	5738031	17105	2	NM_167045	0	CG32758	CG32758
[truncated: 4,561 more rows]

## Sheet: CBP & BALL peaks on promoters 
Chrom	Start	End	Filter_SAM_or_BAM__output_SAM_or_BAM_on_data_207__bam_peak_2	X87	.	X2.70627	X10.41792	X8.70929	X121	annotation	geneChr	geneStart	geneEnd	geneLength	geneStrand	transcriptId	distanceToTSS	geneName	geneId
[truncated: 5,865 more rows]
